# Supplementary material for: Estimates of the 2016 global burden of kidney disease attributable to ambient fine particulate matter air pollution
Source: PubMed Central journal article supplement — BMJ Open. 2019 May 9;9(5):e022450. doi: 10.1136/bmjopen-2018-022450 (PMC6528010; doi:10.1136/bmjopen-2018-022450), 2019-05-09
Supplement: bmjopen-2018-022450.draft_revisions.pdf [file bmjopen-2018-022450.draft_revisions.pdf]

# BMJ Open

BMJ Open is committed to open peer review. As part of this commitment we make the peer review history of every article we publish publicly available.

When an article is published we post the peer reviewers' comments and the authors' responses online. We also post the versions of the paper that were used during peer review. These are the versions that the peer review comments apply to.

The versions of the paper that follow are the versions that were submitted during the peer review process. They are not the versions of record or the final published versions. They should not be cited or distributed as the published version of this manuscript.

BMJ Open is an open access journal and the full, final, typeset and author-corrected version of record of the manuscript is available on our site with no access controls, subscription charges or pay-per-view fees (<http://bmjopen.bmj.com>).

If you have any questions on BMJ Open's open peer review process please email [info.bmjopen@bmj.com](mailto:info.bmjopen@bmj.com)

# BMJ Open

## The 2016 Global Burden of Kidney Disease Attributable to Fine Particulate Matter Air Pollution

|                               |                                                                                                                                                                                                                                                                                                                                                                                                                                                                                                                                                                                                                                                                                                                                                                   |
|-------------------------------|-------------------------------------------------------------------------------------------------------------------------------------------------------------------------------------------------------------------------------------------------------------------------------------------------------------------------------------------------------------------------------------------------------------------------------------------------------------------------------------------------------------------------------------------------------------------------------------------------------------------------------------------------------------------------------------------------------------------------------------------------------------------|
| Journal:                      | <i>BMJ Open</i>                                                                                                                                                                                                                                                                                                                                                                                                                                                                                                                                                                                                                                                                                                                                                   |
| Manuscript ID                 | bmjopen-2018-022450                                                                                                                                                                                                                                                                                                                                                                                                                                                                                                                                                                                                                                                                                                                                               |
| Article Type:                 | Research                                                                                                                                                                                                                                                                                                                                                                                                                                                                                                                                                                                                                                                                                                                                                          |
| Date Submitted by the Author: | 19-Feb-2018                                                                                                                                                                                                                                                                                                                                                                                                                                                                                                                                                                                                                                                                                                                                                       |
| Complete List of Authors:     | <p>Bowe, Benjamin; VA Saint Louis Health Care System, Clinical Epidemiology Center</p> <p>Xie, Yan; VA Saint Louis Health Care System, Clinical Epidemiology Center</p> <p>Li, Tingting; VA Saint Louis Health Care System, Clinical Epidemiology Center; Washington University in Saint Louis School of Medicine, Internal Medicine</p> <p>Yan, Yan; VA Saint Louis Health Care System, Clinical Epidemiology Center; Washington University in Saint Louis School of Medicine, Public Health Sciences</p> <p>Xian, Hong; VA Saint Louis Health Care System, Clinical Epidemiology Center; Saint Louis University, School of Public Health, Department of Biostatistics</p> <p>Al-Aly, Ziyad; VA Saint Louis Health Care System, Clinical Epidemiology Center</p> |
| Keywords:                     | Nephrology < INTERNAL MEDICINE, Chronic renal failure < NEPHROLOGY, PUBLIC HEALTH                                                                                                                                                                                                                                                                                                                                                                                                                                                                                                                                                                                                                                                                                 |
|                               |                                                                                                                                                                                                                                                                                                                                                                                                                                                                                                                                                                                                                                                                                                                                                                   |

SCHOLARONE™  
Manuscripts

## The 2016 Global Burden of Kidney Disease Attributable to Fine Particulate Matter Air Pollution

Benjamin Bowe<sup>1</sup>, Yan Xie<sup>1</sup>, Tingting Li<sup>1,2</sup>, Yan Yan<sup>1,3</sup>, Hong Xian<sup>1,4</sup>, and Ziyad Al-Aly<sup>1,2,5,6</sup>.

<sup>1</sup>Clinical Epidemiology Center, Research and Education Service, VA Saint Louis Health Care System,  
Saint Louis, Missouri

<sup>2</sup>Department of Medicine, Washington University School of Medicine, Saint Louis, Missouri

<sup>3</sup>Division of Public Health Sciences, Department of Surgery, Washington University School of Medicine, Saint  
Louis, Missouri

<sup>4</sup>Department of Epidemiology and Biostatistics, College for Public Health and Social Justice, Saint Louis  
University,  
Saint Louis, Missouri

<sup>5</sup>Nephrology Section, Medicine Service, VA Saint Louis Health Care System,  
Saint Louis, Missouri

<sup>6</sup>Institute for Public Health, Washington University in Saint Louis, Saint Louis, Missouri

**Running title:** Global Burden of Kidney Disease Attributable to Air Pollution

**Word count for abstract: 300**  
**Word count for text: 3500**

### Corresponding Author:

Ziyad Al-Aly, M.D.  
VA Saint Louis Health Care System  
915 North Grand Boulevard, 151-JC  
Saint Louis, MO 63106  
Telephone: (314) 289-6333  
E-mail: [zalaly@gmail.com](mailto:zalaly@gmail.com)

**Abstract:**

**Objective:** To quantitate the 2016 global and national burden of chronic kidney disease (CKD) attributable to fine particulate matter air pollution (PM<sub>2.5</sub>).

**Design:** We used the Global Burden of Disease (GBD) study data and methodologies to estimate the 2016 burden of CKD attributable to PM<sub>2.5</sub> in 194 countries and territories. Population weighted PM<sub>2.5</sub> levels and incident rates of CKD for each country were curated from the GBD study publicly available data sources.

**Setting:** GBD global and national data on PM<sub>2.5</sub> and CKD

**Participants:** 194 countries and territories.

**Main outcome measures:** We estimated the attributable burden of disease (ABD), years living with disability (YLD), years of life lost (YLL), and disability-adjusted life-years (DALYs).

**Results:** The 2016 global burden of incident CKD attributable to PM<sub>2.5</sub> was 6,950,514 (95% Uncertainty Interval: 5,061,533-8,914,745). Global YLD, YLL, and DALYs of CKD attributable to PM<sub>2.5</sub> were 2,849,311 (1,875,219-3,983,941), 8,587,735 (6,355,784-10,772,239), and 11,445,397 (8,380,246-14,554,091), respectively. Age-standardized ABD, YLL, YLD, and DALY rates varied substantially among geographies. Populations in Mesoamerica, Northern Africa, several countries in the Eastern Mediterranean region, Afghanistan, Pakistan, India, and several countries in Southeast Asia were amongst those with highest age-standardized DALY rates. For example, age-standardized DALYs per 100,000 were 543.35 (391.16-707.96) in El Salvador, 455.29 (332.51-577.97) in Mexico, 408.41 (283.82-551.84) in Guatemala, 238.25 (173.90-303.98) in India, and 178.26 (125.31-238.47) in Sri Lanka, compared to 5.52 (0.82-11.48) in Sweden, 6.46 (0.00-14.49) in Australia, and 12.13 (4.95-21.82) in Canada. Frontier analyses showed that Mesoamerican countries had significantly higher CKD DALY rates relative to other countries with comparable socio-demographic development.

**Conclusions:** Our results demonstrate that the global toll of CKD attributable to air pollution is significant, and identify several endemic geographies where air pollution may be a significant driver of CKD burden. Air pollution may need to be considered in the discussion of the global epidemiology of CKD.



**Strengths and limitation of this study:**

- The study leveraged the availability of the Global Burden of Disease study data which is the most comprehensive compilation and analysis of global health information available.
- The study quantitated the burden of CKD attributable to air pollution using the combined measure of disability-adjusted-life-years (DALYs) which comprehensively captures the years of healthy life lost due to dying prematurely and to the years living with disability.
- For each estimate reported in this study, we also provide a measure of uncertainty (Uncertainty Intervals) to reflect how much is known, but more importantly how much is not known.
- The burden was quantitated at the country level, the study does not provide subnational estimates of CKD burden.
- Global burden of disease estimates while considered robust and reliable, are necessarily limited by the quality of the available data.

## Introduction:

Several studies described substantial geographic variation in the burden of chronic kidney disease (CKD) that cannot be explained by traditional drivers including diabetes, and hypertension<sup>1-3</sup>. It was suggested that other risk factors including environmental pollution may explain these geographic variations<sup>4</sup>. We recently characterized fine particulate matter of <2.5 µm in aerodynamic diameter (PM<sub>2.5</sub>) as a novel risk factor for development and progression of kidney disease and described a linear relationship between exposure to levels of PM<sub>2.5</sub> and risk of incident CKD, kidney disease progression, and end stage renal disease<sup>5</sup>.

The global burden of kidney disease attributable to air pollution has not been previously described. A quantitative assessment of the global burden of kidney disease attributable to air pollution might explain some of the geographic variation in burden of kidney disease, help identify endemic areas, and contribute to the global and national discussions about the effect of environmental pollution on non-communicable disease in general, and more specifically on the potential impact of air pollution on the global epidemiology of CKD. In this work, we used the Global Burden of Disease (GBD) study methodologies to estimate the burden of CKD attributable to fine particulate matter air pollution in 194 countries and territories using the following measures: attributable burden of disease (ABD), years living with disability (YLD), years of life lost (YLL), and disability-adjusted life years (DALYs).

## Methods:

### Global Data Sources:

National PM<sub>2.5</sub> exposure levels were obtained from the Global Burden of Disease (GBD)<sup>6,7</sup>. The GBD PM<sub>2.5</sub> values are derived from the integration of satellite data, surface measurements, geographic data, and a chemical transport model, at an 11 by 11 km resolution, and then aggregated to national level population weighted means to produce a national exposure estimate<sup>6,7</sup>. Estimates of global and national incident rates, YLDs, YLLs, DALYs of chronic kidney disease, and their uncertainty levels were obtained from the 2016 GBD<sup>8,9</sup>. The GBD aims to use all accessible information on disease occurrence, natural history, and severity that meets inclusion criteria, drawing on a large network collaborators for subject matter expertise on disease and injury to generate internally consistent, comprehensive global health statistics on the burden of disease<sup>10</sup>. GBD

1 uses an integrative Bayesian meta-regression method which estimates a generalized negative binomial model  
2 for all epidemiological data through DisMod-MR 2.1 to compute GBD estimates of disease burden including  
3 YLDs, YLLs, and DALYs<sup>10</sup>. Estimates are generated using hierarchical modeling methodology that accounts  
4 for temporal, geospatial, gender, age, and cause specific variance to establish attributable burden of kidney  
5 disease across all levels of the GBD framework<sup>8 11-14</sup>. Key to GBD estimates are the propagation of uncertainty  
6 through the modeling process, which incorporates uncertainty due to diversity in data sources, sparsity of data  
7 for some parts of the world, modeling choices, and other factors which impact estimation such as the  
8 determination of disability weights. Detailed descriptions of overall GBD 2016 methodologies and specific CKD  
9 methodology have been provided elsewhere<sup>8 10-15</sup>. Population size was obtained from the GBD Population  
10 Estimates dataset<sup>16</sup>. Country income classifications were obtained from the World Bank<sup>17</sup>.

### 23 **PM<sub>2.5</sub> Risk Estimation:**

24 PM<sub>2.5</sub> risk estimation was obtained from prior work assessing the association of PM<sub>2.5</sub> with kidney disease  
25 outcomes<sup>5</sup>. Department of Veterans Affairs datasets were linked with the Center for Disease Control's (CDC)  
26 National Environmental Public Health Tracking Network annual particulate matter estimates for the contiguous  
27 United States, which originates from Community Multiscale Air Quality (CMAQ) modeled output<sup>18</sup>. Time  
28 dependent adjusted Cox Proportional Hazard survival models, where cohort participants' exposure was  
29 updated annually and upon movement in residence, were used to investigate the association between PM<sub>2.5</sub>  
30 and time until incident eGFR <60 ml/min/1.73m<sup>2</sup>. Models were adjusted for age, race, sex, cancer,  
31 cardiovascular disease, chronic lung disease, diabetes mellitus, hyperlipidemia, hypertension, eGFR at time of  
32 cohort entry, BMI, smoking status, angiotensin-converting enzyme inhibitor/angiotensin receptor blocker use,  
33 county population density, number of outpatient eGFR measurements, number of hospitalizations, and county  
34 percent in poverty. Alternate analyses using time zero exposure values, and using NASA data as an alternate  
35 exposure source produced consistent results<sup>19 20</sup>. Ambient sodium levels were investigated as a negative  
36 control, where there existed no biologic bases to support an association with risk of incident CKD. Results for  
37 every IQR (0.046 µg/m<sup>3</sup>) increase in sodium showed a vanishingly weak association, 0.99 (0.99-0.99).  
38  
39  
40  
41  
42  
43  
44  
45  
46  
47  
48  
49  
50  
51  
52  
53  
54  
55  
56  
57  
58  
59  
60

To estimate risk in each country, we relied on the PM<sub>2.5</sub> pollution and risk relationship characterized in the prior study described above<sup>21</sup> where PM<sub>2.5</sub> levels ranged from 5.0 to 22.1 µg/m<sup>3</sup><sup>21</sup>. In this study, we took a conservative approach where we considered annual average PM<sub>2.5</sub> exposure greater than 22.1 µg/m<sup>3</sup> to contribute the same amount of risk as an exposure of 22.1 µg/m<sup>3</sup><sup>6 22</sup>. This approach is supported by findings from GBD and several other studies where integrated exposure response functions suggest that risk of adverse health outcomes of PM<sub>2.5</sub> pollution levels off (follows a near plateau morphology) at PM<sub>2.5</sub> concentrations exceeding 20-25 µg/m<sup>3</sup><sup>6 7 23</sup>.

### **Population Attributable Fraction (PAF) and Attributable Burden of Disease (ABD):**

The PAF of CKD due to PM<sub>2.5</sub> exposure above the theoretical minimum risk exposure level (TMREL) was calculated using an adapted Global Burden of Disease equation<sup>14</sup>. This PAF can be interpreted as the proportion of incident CKD attributable to PM<sub>2.5</sub> exposure that exceeds the TMREL. The Proportional Hazards based equation for PAF in a country is:

$$PAF = \frac{HR(x) - HR(TMREL)}{HR(x)}$$

where HR(x) is the hazard ratio for PM<sub>2.5</sub> at the national exposure level, and HR(TMREL) is the hazard ratio for PM<sub>2.5</sub> at the TMREL. The TMREL was defined according to the Global Burden of Disease (GBD) study methodologies<sup>7 24 25</sup>. The TMREL was assigned as a uniform distribution of PM<sub>2.5</sub> from 2.4 to 5.9 µg/m<sup>3</sup>, which represents exposure values between the minimum and fifth percentiles of exposure distributions from outdoor air pollution cohort studies included in the GBD analyses<sup>7 24 25</sup>. Levels under the TMREL were treated as contributing no risk<sup>7</sup>. Results were repeated utilizing the World Health Organization (WHO) Air Quality Guidelines for annual average of PM<sub>2.5</sub> concentration of 10 µg/m<sup>3</sup> as the TMREL<sup>26</sup>.

Burden of CKD attributable to PM<sub>2.5</sub> above the TMREL, as the number of incident CKD per year attributable to PM<sub>2.5</sub> above the TMREL, was calculated using estimates from the 2016 GBD<sup>11</sup>, from the equation:

$$ABD = PAF * IR * population$$

where PAF is the population attributable fraction, IR is the incident rate of CKD, and population those in which the burden is being assessed<sup>2</sup>. Results were repeated utilizing the WHO TMREL.

## **Years Living with Disability (YLD), Years of Life Lost (YLL), and Disability Adjusted Life years (DALYs):**

YLD, YLL, and DALY values were estimated by multiplying the CKD specific GBD values of the corresponding burden measure by the PAF<sup>11 15</sup>, resulting in YLD, YLL, and DALY values due to CKD attributable to PM<sub>2.5</sub>.

YLD, YLL, and DALY estimates due to chronic kidney disease were obtained from the GBD results tool<sup>8 9</sup>. The basis of their calculation is presented below, further information has been described elsewhere<sup>11 15</sup>. Results were repeated utilizing the WHO TMREL.

YLD due to CKD is calculated as:

$$YLD = I * DW * R$$

where I is the incident cases of CKD in the population, DW is the disability weight for CKD representative of the severity of its impact on a person's life (0, no impact, to 1, the same as death), and R is the average duration of CKD until remission or death. YLD due to CKD is a measure of the burden placed on a population due to the ill-effects of living with CKD<sup>27</sup>.

Years of Life Lost due to CKD is calculated using the equation:

$$YLL = N * L$$

where N is the number of deaths due to CKD, and L is the difference between age of death and average life expectancy due to CKD. YLL due to CKD is a measure of the burden placed on a population due to dying prematurely from CKD. Estimates of the difference between average life expectancy and age of death from CKD come from a GBD set of age and location-year specific life tables<sup>8 11-14</sup>.

Disability Adjusted Life Years due to CKD is calculated using the equation:

$$DALY = YLD + YLL$$

The DALY due to CKD is a summary measure of YLD and YLL and represents the total years of healthy life lost due to ill-health, disability, or early death due to CKD.

### **Measure Estimation and Uncertainty:**

In order to incorporate the uncertainty in measurements used in our estimation, all measures were generated from a distribution of 10,000 predictions, where the median (UI: 2.5<sup>th</sup>-97.5<sup>th</sup> percentile) are reported. Predictions

1 incorporated uncertainty by randomly sampling from, unless otherwise specified, constructed normal  
2 distributions of the relevant measures. Uncertainty was derived from the TMREL distribution, the standard error  
3 of the  $PM_{2.5}$  beta estimate, and the uncertainty of the incident rates, YLD, YLL and DALY from the GBD data.  
4 While accounting for variability in measures, measures sampled under zero were set to zero. Values of zero  
5 thus represent instances of estimated zero burden, reflective of areas where the corresponding  $PM_{2.5}$  levels are  
6 below the TMREL distribution, or where uncertainty was enough to result in such estimates. Maps of age-  
7 standardized rates are presented. All analyses were performed in SAS Enterprise Guide version 7.1 (SAS  
8 Institute, Cary, NC). Maps were generated using Arc Map 10 (ESRI, Redlands, CA). The circular layout image  
9 was generated using the Circos software package<sup>28</sup>.

### 21 **Frontier Analysis:**

22 Frontier analysis was conducted as a quantitative methodology to identify the lowest potentially achievable age  
23 standardized DALYs on the basis of development status as measured by the Socio-demographic Index (SDI).  
24 SDI is a summary measure of a country or territory's socio-demographic development; it is a composite  
25 measure of average income per person, educational attainment, and total fertility rate in any given country. The  
26 minimum possible SDI is zero, maximum is 100; it is comparable across geography and over time<sup>29</sup>. The  
27 DALYs frontier delineates the minimum DALY that could be achieved for every geography (country or territory)  
28 given its SDI. Distance from the frontier is termed effective difference; if a country or territory exhibits a large  
29 effective difference from the frontier given its SDI, then this likely suggests unrealized opportunities for gains or  
30 improvement (reduction in DALYs) that should be possible based on the country or territory's state on the  
31 development spectrum. A data envelope analysis, which allows for non-linear frontiers, utilizing the free  
32 disposal hull method was developed to produce a frontier for age adjusted DALYs<sup>29-31</sup>. In order to account for  
33 uncertainty, we used 1,000 bootstrapped samples of the data, randomly sampling with replacement from all  
34 countries and territories. LOESS regression was then used on this result to produce a smoothed frontier<sup>29</sup>.  
35 Super-efficient countries were excluded, to remove the influence of outliers, in the generation of the frontier<sup>29</sup>.  
36 Absolute distances from the frontier of each country are reported as effective difference, where any countries  
37 with lower DALYs than the frontier were assigned a zero distance.

In order to account the effect of variation in prevalence of primary drivers of CKD (hypertension and diabetes) on differences in overall DALY rates, we repeated the frontier analysis following a decomposition analysis to generate risk deleted cause-specific age standardized DALY rates of CKD attributable to  $PM_{2.5}$ <sup>15</sup>, where risks deleted were hypertension and diabetes. Diabetes and Hypertension cause specific CKD rates were obtained from the 2016 GBD, which were then subtracted from overall rates and then multiplied by the PAF<sup>9</sup>. The risk deleted DALY can be conceptualized by the formula:

$$DALY_O = DALY_{DHO} * (1 - PAF_{DH})$$

Where  $DALY_O$  is the DALY due to other causes,  $DALY_{DHO}$  is the DALY due to all three causes, and  $PAF_{DH}$  is the population attributable fraction due to diabetes and hypertension.

### **Patient involvement:**

No patients were involved in developing the aims, design, or implementation of this study. No patients were involved in the interpretation of study results, or write up of the manuscript.

### **Results:**

#### **Global burden of kidney disease attributable to air pollution:**

In 2016, the global annual burden of incident CKD attributable to elevated  $PM_{2.5}$  was, in 1000s, 6,950.51 (95% Uncertainty Interval: 5,061.53-8,914.74). ABD rate per 100,000 people was 94.29 (68.67, 120.94), and age standardized ABD rate per 100,000 was 101.39 (74.49, 129.69) (table 1).

The 2016 global YLD, YLL, and DALYs of CKD attributable to elevated  $PM_{2.5}$  are reported in table 2 as absolute values in 1000s, rates per 100,000 population, and age standardized rates per 100,000. Age standardized rates for YLD, YLL, and DALYs were 40.97 (26.84, 57.11), 122.71 (90.36, 153.52), and 163.69 (120.58, 207.28), respectively (table 2).

#### **Burden of kidney disease attributable to air pollution at the national level:**



1 ABD, YLD, YLL, and DALYs reported as absolute values, as rates per 100,000 population, and as age  
2 standardized rates per 100,000 population for 10 most populated countries (table 1 and 2), and for 194  
3 countries and territories are provided in supplemental table 1 and supplemental table 2.  
4  
5  
6  
7

8 Among the 10 most populated countries in the world, India followed by China had the highest attributable  
9 burden of incident CKD due to air pollution globally (ABD=1,092.52, UI=791.38-1407.28, and 766.73, 558.72-  
10 985.14, in 1000s, respectively). India also outranked China in estimates standardized by population size, and  
11 age distribution (table 1). Age standardized ABD in the 10 most populated countries showed Nigeria,  
12 Bangladesh, and India having high burden exceeding 100 incident cases of CKD per 100,000 population (table  
13 1). Age standardized ABD per 100,000 population varied substantially among geographies; where it was  
14 highest in Guinea-Bissau, El Salvador, Senegal, Togo, Benin, Mauritania, Chad, Ghana, Niger, and Mali  
15 (supplemental table 1, figure 1a)). Mapping the geographic distribution of age standardized ABD rates showed  
16 high burden in Mesoamerica, several countries in Central and South Africa, Mongolia, and several countries in  
17 the Far East and the Eastern Mediterranean region (figure 1a). Countries with the lowest age standardized  
18 ABD per 100,000 population included Canada, Greenland, several countries in Scandinavia, Brunei, New  
19 Zealand, and Australia (supplemental table 1, figure 1a).  
20  
21  
22  
23  
24  
25  
26  
27  
28  
29  
30  
31  
32  
33  
34  
35

### 36 **Years Living with Disability:**

37  
38 Estimates for YLD in absolute terms, rates per 100,000 population, and age standardized YLL rates are  
39 provided in table 2 for the 10 most populated countries, and in supplemental table 2 for 194 countries and  
40 territories. Among the 10 most populated countries, Nigeria had the highest age standardized YLD rate per  
41 100,000 population (YLD=71.93, UI=45.61-103.27), followed by Bangladesh (45.58, 28.89-64.56), and then  
42 India (45.40, 29.19-64.54). Among all countries, Iraq, Afghanistan, Guinea-Bissau, Senegal, Chad, Turkey,  
43 Mali, Niger, and Yemen had the highest age standardized YLD rate per 100,000 population (supplemental  
44 table 2, figure1b).  
45  
46  
47  
48  
49  
50  
51  
52  
53  
54

### 55 **Years of Life Lost:**



1 Estimates for YLL in absolute numbers, rates per 100,000 population, and age standardized rates per 100,000  
2 population for 10 most populated countries and for 194 countries and territories are provided in table 2 and  
3 supplemental table 2, respectively. Among the 10 most populated countries, Pakistan had the highest age  
4 standardized YLL per 100,000 population (YLL=215.59, UI=123.95-322.52), followed by India (192.55, 138.73-  
5 249.04), and then Bangladesh (137.57, 98.14-179.69). Among all countries and territories, Afghanistan, El  
6 Salvador, Nicaragua, Mexico, Honduras, Philippines, Guatemala, Iraq, Palestine, and Belize had the highest  
7 age standardized YLL per 100,000 population (supplemental table 2, figure 1c).  
8  
9  
10  
11  
12  
13  
14  
15  
16

### 17 **Disability-Adjusted Life-Years:**

18  
19 Among the 10 most populated countries, India had the highest DALY (DALY=2,502.15, UI=1,827.96-3,204.77  
20 in 1000s), followed by China (1,651.72, 1,212.35-2,103.21), and then Pakistan (342.45, 213.87-492.17) (table  
21 2). DALY rates per 100,000 population showed that India remained on top with DALY rate of 190.77  
22 (UI=139.37-244.33), followed by Pakistan with DALY rate of 181.14 (UI=113.12-260.33), then Bangladesh with  
23 DALY rate of 136.84 (UI=99.13-176.20) (table 2). Age standardized DALY rates showed Pakistan leading,  
24 followed by India, then Bangladesh with age adjusted DALY rates of 254.25 (UI=157.33-365.23), 238.25  
25 (UI=173.90-303.98), and 183.21 (132.76-236.87), respectively.  
26  
27  
28  
29  
30  
31  
32  
33  
34  
35

36 Among all countries and territories, those with the highest age standardized DALY rates included Afghanistan,  
37 El Salvador, Nicaragua, Mexico, Honduras, Iraq, Guatemala, Philippines, Palestine, and Belize (supplemental  
38 table 2). Mapping the geographic distribution of age standardized DALY rates across the globe showed  
39 populations in Mesoamerica, Northern Africa, South Africa, several countries in the Eastern Mediterranean  
40 Region, Afghanistan, Pakistan, India, and several countries in Southeast Asia were amongst those with highest  
41 age standardized DALY rates (figure 1d). For example, age standardized DALYs per 100,000 were 543.35  
42 (391.16-707.96) in El Salvador, 455.29 (332.51-577.97) in Mexico, 408.41 (283.82-551.84) in Guatemala,  
43 295.39 (203.17-401.39) in Jordan, 273.55 (184.84-379.35) in Egypt, 264.23 (181.58-360.76) in Morocco,  
44 259.46 (189.72-330.98) in South Africa, 205.12 (148.73-264.89) in Thailand, 183.21 (132.76-236.87) in  
45 Bangladesh, and 178.26 (125.31-238.47) in Sri Lanka. The map identified Canada, several northern European  
46 and Scandinavian countries, New Zealand, and Australia as having lowest estimates of age standardized  
47  
48  
49  
50  
51  
52  
53  
54  
55  
56  
57  
58  
59

1 DALY rates. For example, age standardized DALY rates were 5.52 (0.82-11.48) in Sweden, 6.46 (0.00-14.49)  
2 in Australia, and 12.13 (4.95-21.82) in Canada (figure 1d).  
3  
4

### 5 **Frontier analysis:**

6  
7 We developed a frontier analysis to identify countries and territories which exhibited the least burden of kidney  
8 disease attributable to particulate matter air pollution given their SDI. The analysis provides a comparative  
9 quantitative assessment of the potential reduction in CKD burden that might be achievable in each country  
10 given their social and economic development. Most importantly, for each SDI, this analysis identifies exemplar  
11 countries at the frontier (with lowest DALYs for their SDI), and countries with the highest DALYs for their SDI.  
12 The effective difference between the frontier and the highest DALYs given an SDI represents a hypothetical  
13 magnitude of potential improvement in impact of air pollution on burden of CKD in a given country. Frontier  
14 analysis of age adjusted DALYs are presented in figure 2. Supplemental table 3 provides the effective  
15 difference from the frontier for each country given that country SDI; countries with the largest effective  
16 difference were El Salvador, Afghanistan, Mexico, Nicaragua, Honduras, Philippines, Iraq, Guatemala, and  
17 Palestine. Among countries with an SDI<0.3, Somalia, Niger, Liberia, the Democratic Republic of Congo,  
18 Mozambique, and Burundi had age standardized DALY rates that are close to the frontier with an effective  
19 difference of less than 10. Afghanistan, Guinea-Bissau, and Chad also had an SDI <0.3; however, they  
20 exhibited relatively high age standardized DALY rates and effective difference from the frontier which  
21 exceeded 100 representing a large gap in performance vis-à-vis other countries with comparable resources.  
22 Among reasonably well-resourced countries with an SDI>0.7, Mexico, Mauritius, The United Arab Emirates,  
23 Saudi Arabia, Turkmenistan, Venezuela, South Africa, Bahrain, and Mongolia had an effective difference from  
24 the frontier of more than 200 representing potential unrealized opportunities for progress in those countries  
25 given their resources.  
26  
27  
28  
29  
30  
31  
32  
33  
34  
35  
36  
37  
38  
39  
40  
41  
42  
43  
44  
45  
46  
47  
48  
49

50 To further evaluate the frontier independent of potential contamination by other strong drivers of CKD such as  
51 diabetes—where it is a major driver in Mexico<sup>32</sup>—and hypertension, we rebuilt the entire frontier following a  
52 decomposition analysis of risk-deleted cause-specific DALYs where we risk deleted DALYs caused by  
53 diabetes and hypertension. This analysis yielded consistent results (supplemental figure 1); specifically, that  
54  
55  
56  
57  
58  
59

several countries including Mesoamerica exhibited significant effective difference from the frontier suggesting a disproportionately higher PM<sub>2.5</sub> attributable DALYs than would be expected by their SDI (supplemental figure 1).

### **Burden of CKD attributable to PM<sub>2.5</sub> levels above the WHO limit of 10 µg/m<sup>3</sup>:**

All the primary analyses were developed considering risk attributable to exposure levels of PM<sub>2.5</sub> above a uniform distribution between 2.4-5.9 µg/m<sup>3</sup> representing exposure values between the minimum and fifth percentiles of exposure distributions from outdoor air pollution studies<sup>6,7</sup>.

We repeated all the analyses where we considered risk attributable to exposure levels of PM<sub>2.5</sub> above the WHO limit of 10 µg/m<sup>3</sup> (using the alternate scenario where the theoretical minimal risk exposure level was set at 10 µg/m<sup>3</sup>)<sup>5</sup>. The estimates describe the burden of kidney disease—globally and at the national level—that is attributable to PM<sub>2.5</sub> concentrations in excess of the WHO limit. The geographic distribution of burden was consistent with the primary results (supplemental table 4 and 5). The results from this analysis necessarily underestimate the true burden as they—by definition—ignore PM<sub>2.5</sub> related risk below the WHO limit, but might be informative to policy makers and relevant stakeholders in estimating the burden of CKD that could be avoided should targeting the WHO limit become a policy goal.

### **Discussion:**

In this work, we provide a quantitative analysis of the global burden of CKD attributable to air pollution in 194 countries and territories. The results describe the annual incidence of kidney disease attributable to air pollution globally and at the national level, and provide a quantitative assessment of the years living with disability due to kidney disease, years of life lost due to early mortality from kidney disease, and the combined comprehensive measure of DALYs (years of healthy life lost, due to dying prematurely, and to the years living with disability) of kidney disease attributable to air pollution. The global toll of CKD attributable to air pollution is significant with 6.9 million incident cases of CKD per year, 101 cases per 100,000 population per year, and 11.4 million DALYs per year. The findings suggest substantial geographic variation and identify geographies where the toll of air pollution may be a significant driver of the epidemiology of kidney disease. Our analyses also suggest disproportionately higher PM<sub>2.5</sub> DALYs from kidney disease in several countries including Mesoamerica than would be expected for their SDI.

1  
2 According to the GBD study, global age standardized DALY rates attributable to PM<sub>2.5</sub> are 1,521 per 100,000<sup>33</sup>.  
3  
4 Our estimates of PM<sub>2.5</sub> CKD DALYs were 164, representing 10.7% of the total global DALYs -years of healthy  
5  
6 life lost- attributable to air pollution<sup>33</sup>. Our analyses suggest that the overall burden of kidney disease  
7  
8 attributable to air pollution is shaped by the epidemiologic transition<sup>34</sup>. Among countries that are poor with a  
9  
10 high burden of communicable diseases and reduced life expectancy (for example several countries in the  
11  
12 African continent), we observed a lower global ranking for years of life lost than years of living with disability  
13  
14 (figures 1b, and 1c), reflecting increased probability of early loss of life from other diseases not related to air  
15  
16 pollution. The corollary observation is that in countries that are relatively more developed including  
17  
18 Mesoamerica, South America (including Venezuela, Gynae, Surinam, and Bolivia), Pakistan, India, and several  
19  
20 countries in southeast Asia ranked in the highest decile for YLL, but not in YLD reflecting much earlier loss of  
21  
22 life attributable to air pollution related kidney disease (figures 1b and 1c). The results suggest that as countries  
23  
24 journey forward along the path of the epidemiologic transition, the contribution of air pollution to non-  
25  
26 communicable disease mortality in general, and more specifically CKD becomes more pronounced.  
27  
28 Unfortunately, CKD has been largely ignored in the global and WHO discussion of non-communicable  
29  
30 diseases<sup>35-38</sup>; CKD and its environmental drivers should feature on the national, international development, and  
31  
32 global health agendas<sup>38-40</sup> and should be assigned a priority commensurate with its ascending rank among the  
33  
34 global burden of diseases<sup>2 8 11-14 41-46</sup>.  
35  
36  
37  
38  
39

40 Our results show substantial geographic variation in the global burden of CKD attributable to air pollution  
41  
42 (figure 1d), where low and lower-middle income countries are most affected (figure 3, and supplemental figure  
43  
44 2). Air pollution is a significant global problem with well documented transboundary health impacts due to  
45  
46 international trade, and atmospheric pollutant transport<sup>47</sup>; it results in an estimated 4.2 million deaths per year,  
47  
48 and is worsening especially in low-income, and middle-income countries<sup>13 33 39 48</sup>. This is consistent with  
49  
50 findings from the State of Global Air 2017 report where the largest increases in air pollution related death were  
51  
52 in rapidly industrializing low and middle income countries<sup>33 39</sup>. The global burden of CKD is increasing and its  
53  
54 rank as a contributor to disability and death is ascending<sup>45</sup>; it disproportionately impacts low-income and  
55  
56 middle-income countries<sup>1 38 45 49</sup> which are least equipped to provide costly but life-saving CKD care<sup>35 36</sup>. While  
57  
58  
59

1 diabetes mellitus and hypertension are the leading causes of CKD in high and upper middle-income countries,  
2 a significant proportion of CKD cannot be explained by these traditional causes in low and lower middle-  
3 income countries where environmental exposures loom prominently as potential drivers of non-communicable  
4 diseases including CKD<sup>38 39 50-52</sup>. In an elegant recent editorial Jha and colleagues<sup>53</sup> reflected on the rise of  
5 kidney failure death in India, and suggested that a sizable portion of kidney failure is not due to traditional  
6 drivers (diabetes mellitus), and advocated for a research agenda to identify the drivers of this increased  
7 incidence of kidney failure and kidney failure death. Others have also advocated for greater understanding and  
8 larger emphasis of the role of environmental air pollution in non-communicable diseases, and specifically  
9 kidney disease<sup>39 51</sup>. The rise of CKD-of unknown origin in Mesoamerica and other geographies including India,  
10 and Sri Lanka illustrates the need for a broader and more comprehensive evaluation of potential risk factors for  
11 development and progression of kidney disease<sup>38 54</sup>.  
12  
13  
14  
15  
16  
17  
18  
19  
20  
21  
22  
23  
24

25 Our frontier analysis provides a blueprint to comparatively evaluate the CKD DALYs attributable to air pollution  
26 in countries with similar resources. The analysis identifies a cluster of countries with substantially higher CKD  
27 DALYs than would be expected for their place on the development spectrum. The clustering of countries  
28 including Mesoamerican countries with a high CKD DALYs gap attributable to air pollution is likely not random;  
29 and (a) supports the prescient hypothesis put forth by Orantes-Navarro et al.<sup>54</sup> for inclusion of environmental  
30 air pollution—among others—as a potential risk factor for CKD of unknown cause—a so far elusive disease  
31 entity, vibrantly discussed among luminaries in the field<sup>38 44 55-64</sup>—, and (b) potentially represents unrealized  
32 opportunity for improved performance through interventions in the form of laws, health and economic policy  
33 measures, reprioritization and alignment of resources, technological transition, and other devices that would  
34 ultimately close the DALYs gap. Similarly, our analysis identifies exemplar countries where performance for the  
35 county's level of development is considered leading (at the frontier pushing the envelope), the identification of  
36 these exemplars provides a window for better understanding of the potential drivers for success<sup>36</sup> and  
37 determination whether advocacy and wider adoption of these drivers by other countries might yield decreased  
38 CKD burden<sup>40</sup>.  
39  
40  
41  
42  
43  
44  
45  
46  
47  
48  
49  
50  
51  
52  
53  
54  
55  
56  
57  
58  
59  
60

1 While our analyses described the global and national burden of kidney disease attributable to PM<sub>2.5</sub> air  
2 pollution, consideration of the impact of other air pollutants (i.e. nitrogen oxides, ozone, carbon monoxide,  
3 PM<sub>10</sub>, and others)<sup>50</sup>, a higher spatial resolution analysis at the subnational level, and a greater understanding  
4 of temporal trends over the years (e.g. an annual global CKD burden report which would track the contributions  
5 of all risk factors over time) are certainly needed to develop a better understanding of the epidemiology of CKD  
6 driven by air pollution.  
7  
8  
9  
10  
11  
12  
13  
14

15 This study has several limitations. Our analyses do not account for the composition and toxic content of PM<sub>2.5</sub>;  
16 however, studies have shown that estimates using non-specific PM<sub>2.5</sub> biomass alone will underestimate the  
17 burden of kidney disease attributable to air pollution<sup>6 7 48</sup>. Furthermore, we considered that risk plateaued for  
18 PM<sub>2.5</sub> concentrations above 22 µg/m<sup>3</sup>, this likely yielded conservative estimate of the true burden of CKD  
19 attributable to air pollution. Our analyses were performed at the global and national level where we assigned  
20 PM<sub>2.5</sub> exposure, and generated incident rate of CKD for every country and territory; thus, our analyses do not  
21 provide further insight into the subnational level. We relied on estimates for incident CKD generated by the  
22 Global Burden of Disease study group, and while those Bayesian estimates are considered reliable, and  
23 robust, they are necessarily limited by the quality of the available data<sup>65</sup>. Furthermore, variability and  
24 inconsistency of data collection methods and tools across the countries could influence geographic  
25 variations<sup>65</sup>. Key strengths include leveraging the availability of the 2016 Global Burden of Disease data which  
26 is the most comprehensive compilation and analysis of global health information available; we also employed  
27 GBD methodologies including the concept of DALY to capture the burden of disease across the globe and a  
28 measure of uncertainty (to reflect how much we know, and how much we don't know). We also developed a  
29 frontier analysis to enable comparative evaluation among countries with similar SDI, and finally, we repeated  
30 all analyses using an alternative scenario where we considered the WHO air quality standards as  
31 counterfactual.  
32  
33  
34  
35  
36  
37  
38  
39  
40  
41  
42  
43  
44  
45  
46  
47  
48  
49  
50  
51  
52

53 In sum, our results show that the global toll of CKD attributable to air pollution is significant. The burden varies  
54 substantially by geography. Air pollution might be a contributing risk factor and might partially explain the rise in  
55 the incidence of CKD of unknown cause in some geographies around the world. As countries further develop  
56  
57  
58  
59  
60

and industrialize and travel along the path of the epidemiologic transition, the rise in air pollution related non-communicable disease and specifically kidney disease should be reflected on the global health agendas.

1  
2  
3  
4  
5  
6  
7  
8  
9  
10  
11  
12  
13  
14  
15  
16  
17  
18  
19  
20  
21  
22  
23  
24  
25  
26  
27  
28  
29  
30  
31  
32  
33  
34  
35  
36  
37  
38  
39  
40  
41  
42  
43  
44  
45  
46  
47  
48  
49  
50  
51  
52  
53  
54  
55  
56  
57  
58  
59  
60

For peer review only



## Footnotes

### Acknowledgment:

In this report, we used the publicly available Global Burden of Disease studies data and methodologies. The Global Burden of Disease Collaborator Network is comprised of more than 2,700 collaborators worldwide and is headquartered at the Institute for Health Metrics and Evaluation (IHME) in Seattle, Washington. The estimates used in generating this manuscript relied on the GBD data and methodologies, we acknowledge the visionary global health leadership of IHME, and the contribution of all collaborators without whom this report would not be possible.

We are enormously grateful to Martin Krzywinski for his instrumental help in generating the Circos plot in this manuscript.

**Contributors:** Research area and study design: BB, YX, ZAA; data acquisition: BB, YX, ZAA; data analysis: BB, YX, ZAA; interpretation of study results: BB, YX, TL, YY, HX, ZAA; statistical analysis: BB, YX; drafting the manuscript: BB, ZAA; revision and comment on manuscript: YX, TL, YY, HX; supervision or mentorship: ZAA. Each author contributed important intellectual content during manuscript drafting or revision and accepts accountability for the overall work by ensuring that questions pertaining to the accuracy or integrity of any portion of the work are appropriately investigated and resolved. ZAA takes responsibility that this study has been reported honestly, accurately, and transparently; that no important aspects of the study have been omitted.

**Funding:** This research was funded by the United States Department of Veterans Affairs. The funders of this study had no role in study design; collection, analysis, and interpretation of data; writing the report; and the decision to submit the report for publication.

**Competing interests:** All authors have completed the ICMJE uniform disclosure form at [www.icmje.org/COI\\_disclosure.pdf](http://www.icmje.org/COI_disclosure.pdf) and declare: no support from any organisation for the submitted work; no financial relationships with any organisations that might have an interest in the submitted work in the previous three years; no other relationships or activities that could appear to have influenced the submitted work.

**Ethical approval:** This research project was reviewed and approved by the Institutional Review Board of the VA Saint Louis Health Care System.

**Data sharing:** Data is available through the Global Burden of Disease Results Portal. <http://ghdx.healthdata.org/gbd-results-tool>

**Transparency:** The lead authors affirm that the manuscript is an honest, accurate, and transparent account of the study being reported; that no important aspects of the study have been omitted; and that any discrepancies from the study as planned have been explained.

**Disclaimer:** The contents do not represent the views of the U.S. Department of Veterans Affairs or the United States Government.

**Disclosures:** My co-authors and I declare no conflicts of interest.



**References:**

1. Mills KT, Xu Y, Zhang W, et al. A systematic analysis of worldwide population-based data on the global burden of chronic kidney disease in 2010. *Kidney international* 2015;**88**(5):950-7.
2. Bowe B, Xie, Y, Xian, H, Lian, M, Al-Aly, Z. Geographic Variation and US County Characteristics Associated with Rapid Kidney Function Decline. *Kidney International Reports* 2017;**2**(1):5-17.
3. Bruck K, Stel VS, Gambaro G, et al. CKD Prevalence Varies across the European General Population. *Journal of the American Society of Nephrology* : JASN 2015.
4. Black C, van der Veer SN. Unlocking the Value of Variation in CKD Prevalence. *Journal of the American Society of Nephrology* : JASN 2015.
5. Bowe B, Xie Y, Li T, et al. Particulate Matter Air Pollution and the Risk of Incident CKD and Progression to ESRD. *Journal of the American Society of Nephrology* : JASN 2017.
6. Brauer M, Freedman G, Frostad J, et al. Ambient Air Pollution Exposure Estimation for the Global Burden of Disease 2013. *Environ Sci Technol* 2016;**50**(1):79-88.
7. Cohen AJ, Brauer M, Burnett R, et al. Estimates and 25-year trends of the global burden of disease attributable to ambient air pollution: an analysis of data from the Global Burden of Diseases Study 2015. *Lancet* 2017;**389**(10082):1907-18.
8. Disease GBD, Injury I, Prevalence C. Global, regional, and national incidence, prevalence, and years lived with disability for 328 diseases and injuries for 195 countries, 1990-2016: a systematic analysis for the Global Burden of Disease Study 2016. *Lancet* 2017;**390**(10100):1211-59.
9. Group GBoDS. GBD Results Tool 2017 [GBD Results Tool]. Available from: <http://ghdx.healthdata.org/gbd-results-tool>.
10. Abraham D, Flaxman TV, Christopher J.L. Murray. *An Integrative Metaregression Framework for Descriptive Epidemiology*. First Edition ed: University of Washington Press, 2015.
11. Collaborators GBDRF. Global, regional, and national comparative risk assessment of 84 behavioural, environmental and occupational, and metabolic risks or clusters of risks, 1990-2016: a systematic analysis for the Global Burden of Disease Study 2016. *Lancet* 2017;**390**(10100):1345-422.
12. DALYs GBD, Collaborators H. Global, regional, and national disability-adjusted life-years (DALYs) for 333 diseases and injuries and healthy life expectancy (HALE) for 195 countries and territories, 1990-2016: a systematic analysis for the Global Burden of Disease Study 2016. *Lancet* 2017;**390**(10100):1260-344.
13. Collaborators GBDCoD. Global, regional, and national age-sex specific mortality for 264 causes of death, 1980-2016: a systematic analysis for the Global Burden of Disease Study 2016. *Lancet* 2017;**390**(10100):1151-210.
14. Collaborators GBDM. Global, regional, and national under-5 mortality, adult mortality, age-specific mortality, and life expectancy, 1970-2016: a systematic analysis for the Global Burden of Disease Study 2016. *Lancet* 2017;**390**(10100):1084-150.
15. Collaborators GBDRF. Global, regional, and national comparative risk assessment of 79 behavioural, environmental and occupational, and metabolic risks or clusters of risks, 1990-2015: a systematic analysis for the Global Burden of Disease Study 2015. *Lancet* 2016;**388**(10053):1659-724.
16. 2015 GBoDS. Global Burden of Disease Study 2015 (GBD 2015) Population Estimates 1970-2015. . Institute for Health Metrics and Evaluation (IHME) 2015.
17. Bank W. World Bank Country and Lending Groups: World Bank list of economies June 2017. 2017 [Available from: <https://datahelpdesk.worldbank.org/knowledgebase/articles/906519>].
18. Vaidyanathan A, Dimmick WF, Kegler SR, et al. Statistical air quality predictions for public health surveillance: evaluation and generation of county level metrics of PM2.5 for the environmental public health tracking network. *Int J Health Geogr* 2013;**12**:12.
19. Van Donkelaar A, Martin RV, Brauer M, et al. Use of satellite observations for long-term exposure assessment of global concentrations of fine particulate matter. *Environmental health perspectives* 2015;**123**(2):135.
20. Van Donkelaar A, Martin RV, Brauer M, et al. Global Annual PM2.5 Grids from MODIS, MISR and SeaWiFS Aerosol Optical Depth (AOD), v1 (1998–2012). DATA Palisades, NY: NASA Socioeconomic Data and Applications Center (SEDAC) <http://dx.doi.org/10.7927/H4028PFS> 2015.
21. Bowe B, Xie Y, Li T, et al. Particulate Matter Air Pollution and the Risk of Incident CKD and Progression to ESRD. *Journal of the American Society of Nephrology* : JASN 2018;**29**(1):218-30.

22. Cohen AJ, Brauer M, Burnett R, et al. Estimates and 25-year trends of the global burden of disease attributable to ambient air pollution: an analysis of data from the Global Burden of Diseases Study 2015. *Lancet* 2017.
23. Burnett RT, Pope III CA, Ezzati M, et al. An integrated risk function for estimating the global burden of disease attributable to ambient fine particulate matter exposure. *Environmental health perspectives* 2014;**122**(4):397.
24. Burnett RT, Pope CA, 3rd, Ezzati M, et al. An integrated risk function for estimating the global burden of disease attributable to ambient fine particulate matter exposure. *Environ Health Perspect* 2014;**122**(4):397-403.
25. Lim SS, Vos T, Flaxman AD, et al. A comparative risk assessment of burden of disease and injury attributable to 67 risk factors and risk factor clusters in 21 regions, 1990-2010: a systematic analysis for the Global Burden of Disease Study 2010. *Lancet* 2012;**380**(9859):2224-60.
26. Organization WH. Air Quality Guidelines: Global Update 2005 2005 [Available from: [http://www.who.int/phe/health\\_topics/outdoorair/outdoorair\\_agq/en/](http://www.who.int/phe/health_topics/outdoorair/outdoorair_agq/en/)].
27. Network GBoDC. Global Burden of Disease Study 2016 (GBD 2016) Disability Weights. In: (IHME) IfHMaE, ed. Seattle, Washington, 2017.
28. Krzywinski M, Schein J, Birol I, et al. Circos: an information aesthetic for comparative genomics. *Genome research* 2009;**19**(9):1639-45.
29. Access GBDH, Quality Collaborators. Electronic address cue, Access GBDH, et al. Healthcare Access and Quality Index based on mortality from causes amenable to personal health care in 195 countries and territories, 1990-2015: a novel analysis from the Global Burden of Disease Study 2015. *Lancet* 2017.
30. Bogetoft PaO, L. *Benchmarking with data envelopment analysis, stochastic frontier analysis, and R*. . 2011 edition. ed, 2013.
31. Xie Y, Bowe B, Xian H, et al. Rate of Kidney Function Decline and Risk of Hospitalizations in Stage 3A CKD. *Clinical journal of the American Society of Nephrology : CJASN* 2015;**10**(11):1946-55.
32. Jimenez-Cruz A, Bacardi-Gascon M. The fattening burden of type 2 diabetes on Mexicans: projections from early growth to adulthood. *Diabetes care* 2004;**27**(5):1213-5.
33. Health Effects Institute. 2017. State of Global Air 2017. Special Report. Boston MHEI.
34. Omran AR. The epidemiologic transition: a theory of the epidemiology of population change. 1971. *Milbank Q* 2005;**83**(4):731-57.
35. Levin A, Tonelli M, Bonventre J, et al. Global kidney health 2017 and beyond: a roadmap for closing gaps in care, research, and policy. *Lancet* 2017.
36. Bello AK, Levin A, Tonelli M, et al. Assessment of Global Kidney Health Care Status. *Jama* 2017;**317**(18):1864-81.
37. Organization WH. Global Status Report on Noncommunicable Diseases. WHO Press 2014.
38. Jha V, Garcia-Garcia G, Iseki K, et al. Chronic kidney disease: global dimension and perspectives. *Lancet* 2013;**382**(9888):260-72.
39. Landrigan PJ. Air pollution and the kidney—implications for control of non-communicable diseases. *The Lancet Planetary Health* 2017.
40. Tonelli M, Agarwal S, Cass A, et al. How to advocate for the inclusion of chronic kidney disease in a national noncommunicable chronic disease program. *Kidney international* 2014;**85**(6):1269-74.
41. Glasscock RJ, Warnock DG, Delanaye P. The global burden of chronic kidney disease: estimates, variability and pitfalls. *Nature reviews Nephrology* 2017;**13**(2):104-14.
42. Hill NR, Fatoba ST, Oke JL, et al. Global Prevalence of Chronic Kidney Disease - A Systematic Review and Meta-Analysis. *PLoS One* 2016;**11**(7):e0158765.
43. Whelan E. The global epidemic of chronic kidney disease: a call for action. *Occup Environ Med* 2016;**73**(8):499-500.
44. Weaver VM, Fadrowski JJ, Jaar BG. Global dimensions of chronic kidney disease of unknown etiology (CKDu): a modern era environmental and/or occupational nephropathy? *BMC Nephrol* 2015;**16**:145.
45. Jager KJ, Fraser SDS. The ascending rank of chronic kidney disease in the global burden of disease study. *Nephrology, dialysis, transplantation : official publication of the European Dialysis and Transplant Association - European Renal Association* 2017;**32**(suppl\_2):ii121-ii28.
46. Diabetes GBDEMR, Collaborators CKD, Mokdad AH. Diabetes mellitus and chronic kidney disease in the Eastern Mediterranean Region: findings from the Global Burden of Disease 2015 study. *Int J Public Health* 2017.

- 1 47. Zhang Q, Jiang X, Tong D, et al. Transboundary health impacts of transported global air pollution and  
2 international trade. *Nature* 2017;**543**(7647):705-09.
- 3 48. Lelieveld J, Evans JS, Fnais M, et al. The contribution of outdoor air pollution sources to premature  
4 mortality on a global scale. *Nature* 2015;**525**(7569):367-71.
- 5 49. Neuen BL CS, Demaio AR, et al. Chronic kidney disease and the global NCDs agenda. *BMJ Glob Health*  
6 2017.
- 7 50. Benjamin Bowe YX, Tingting Li, Yan Yan, Hong Xian, Ziyad Al-Aly. Associations of ambient coarse  
8 particulate matter, nitrogen dioxide, and carbon monoxide with the risk of kidney disease: a cohort  
9 study. *The Lancet Planetary Health* 2017.
- 10 51. Stanifer JW, Muiro A, Jafar TH, et al. Chronic kidney disease in low- and middle-income countries.  
11 *Nephrology, dialysis, transplantation : official publication of the European Dialysis and Transplant*  
12 *Association - European Renal Association* 2016;**31**(6):868-74.
- 13 52. Wimalawansa SA, Wimalawansa SJ. Environmentally induced, occupational diseases with emphasis on  
14 chronic kidney disease of multifactorial origin affecting tropical countries. *Ann Occup Environ Med*  
15 2016;**28**:33.
- 16 53. Jha V, Modi G. Uncovering the rising kidney failure deaths in India. *Lancet Glob Health* 2017;**5**(1):e14-e15.
- 17 54. Orantes-Navarro CM, Herrera-Valdes R, Almaguer-Lopez M, et al. Toward a Comprehensive Hypothesis of  
18 Chronic Interstitial Nephritis in Agricultural Communities. *Adv Chronic Kidney Dis* 2017;**24**(2):101-06.
- 19 55. Jayasumana C, Orantes C, Herrera R, et al. Chronic interstitial nephritis in agricultural communities: a  
20 worldwide epidemic with social, occupational and environmental determinants. *Nephrology, dialysis,*  
21 *transplantation : official publication of the European Dialysis and Transplant Association - European*  
22 *Renal Association* 2017;**32**(2):234-41.
- 23 56. Zoccali C. Causal mechanism and component causes in Mesoamerican-Sri Lankan nephropathy: the  
24 moderator's view. *Nephrology, dialysis, transplantation : official publication of the European Dialysis*  
25 *and Transplant Association - European Renal Association* 2017;**32**(4):607-10.
- 26 57. Johnson RJ. Pro: Heat stress as a potential etiology of Mesoamerican and Sri Lankan nephropathy: a late  
27 night consult with Sherlock Holmes. *Nephrology, dialysis, transplantation : official publication of the*  
28 *European Dialysis and Transplant Association - European Renal Association* 2017;**32**(4):598-602.
- 29 58. Campese VM. Con: Mesoamerican nephropathy: is the problem dehydration or rehydration? *Nephrology,*  
30 *dialysis, transplantation : official publication of the European Dialysis and Transplant Association -*  
31 *European Renal Association* 2017;**32**(4):603-06.
- 32 59. Campese VM. The Mesoamerican nephropathy: a regional epidemic of chronic kidney disease?  
33 *Nephrology, dialysis, transplantation : official publication of the European Dialysis and Transplant*  
34 *Association - European Renal Association* 2016;**31**(3):335-6.
- 35 60. Correa-Rotter R, Wesseling C, Johnson RJ. CKD of unknown origin in Central America: the case for a  
36 Mesoamerican nephropathy. *Am J Kidney Dis* 2014;**63**(3):506-20.
- 37 61. Wesseling C, Crowe J, Hogstedt C, et al. Resolving the enigma of the mesoamerican nephropathy: a  
38 research workshop summary. *American journal of kidney diseases : the official journal of the National*  
39 *Kidney Foundation* 2014;**63**(3):396-404.
- 40 62. Johnson RJ, Sanchez-Lozada LG. Chronic kidney disease: Mesoamerican nephropathy--new clues to the  
41 cause. *Nature reviews Nephrology* 2013;**9**(10):560-1.
- 42 63. Garcia-Trabanino R, Jarquin E, Wesseling C, et al. Heat stress, dehydration, and kidney function in  
43 sugarcane cutters in El Salvador--A cross-shift study of workers at risk of Mesoamerican nephropathy.  
44 *Environ Res* 2015;**142**:746-55.
- 45 64. Wimalawansa SJ. Escalating chronic kidney diseases of multi-factorial origin (CKD-mfo) in Sri Lanka:  
46 causes, solutions, and recommendations-update and responses. *Environ Health Prev Med*  
47 2015;**20**(2):152-7.
- 48 65. Thomas B, Matsushita K, Abate KH, et al. Global Cardiovascular and Renal Outcomes of Reduced GFR.  
49 *Journal of the American Society of Nephrology : JASN* 2017;**28**(7):2167-79.
- 50
- 51
- 52
- 53
- 54
- 55
- 56
- 57
- 58
- 59
- 60

## Tables:

**Table 1:** Attributable burden of chronic kidney disease (ABD) associated with PM<sub>2.5</sub> exposure globally, and for the top 10 most populous countries.

| Country           | PM <sub>2.5</sub> | Attributable Burden of Disease (in 1000s) | Attributable Burden of Disease (per 100,000) | Age Standardized Attributable Burden of Disease (per 100,000) |
|-------------------|-------------------|-------------------------------------------|----------------------------------------------|---------------------------------------------------------------|
| <b>Global</b>     | 42.27             | 6,950.51<br>(5,061.53, 8,914.74)          | 94.29<br>(68.67, 120.94)                     | 101.39<br>(74.49, 129.69)                                     |
| <b>China</b>      | 57.2              | 766.73<br>(558.72, 985.14)                | 55.42<br>(40.39, 71.21)                      | 48.98<br>(35.52, 63.01)                                       |
| <b>India</b>      | 72.6              | 1,092.52<br>(791.38, 1,407.28)            | 83.30<br>(60.34, 107.29)                     | 108.21<br>(77.99, 139.22)                                     |
| <b>US</b>         | 8.3               | 163.49<br>(88.76, 262.78)                 | 50.53<br>(27.44, 81.22)                      | 35.44<br>(19.39, 57.44)                                       |
| <b>Indonesia</b>  | 15                | 76.81<br>(53.66, 103.42)                  | 29.81<br>(20.83, 40.15)                      | 37.38<br>(26.05, 50.06)                                       |
| <b>Brazil</b>     | 11.1              | 69.03<br>(45.11, 99.44)                   | 33.21<br>(21.70, 47.84)                      | 36.57<br>(23.68, 52.72)                                       |
| <b>Pakistan</b>   | 63                | 107.43<br>(78.85, 137.04)                 | 56.83<br>(41.71, 72.49)                      | 89.17<br>(64.66, 114.14)                                      |
| <b>Nigeria</b>    | 36.9              | 195.23<br>(141.44, 250.95)                | 106.98<br>(77.51, 137.52)                    | 200.28<br>(145.24, 261.20)                                    |
| <b>Bangladesh</b> | 87                | 136.17<br>(99.56, 174.46)                 | 84.60<br>(61.86, 108.39)                     | 121.08<br>(88.55, 156.18)                                     |
| <b>Russia</b>     | 15.8              | 170.89<br>(118.90, 229.76)                | 115.38<br>(80.27, 155.12)                    | 82.87<br>(57.99, 111.67)                                      |
| <b>Japan</b>      | 13.1              | 134.56<br>(91.13, 186.81)                 | 104.88<br>(71.03, 145.60)                    | 44.79<br>(30.61, 61.70)                                       |

PM<sub>2.5</sub>, Fine particulate matter <2.5 µm



**Table 2:** Years living with disability (YLD), years of life lost (YLL), and disability adjusted life years (DALY) of chronic kidney disease associated with PM<sub>2.5</sub> for the top 10 most populous countries.

| Country           | Years Living with Disability (in 1000s) | Years Living with Disability (per 100,000) | Age Standardized Years Living with Disability (per 100,000) | Years of Life Lost (in 1000s)     | Years of Life Lost (per 100,000) | Age Standardized Years of Life Lost (per 100,000) | Disability Adjusted Life Years (in 1000s) | Disability Adjusted Life Years (per 100,000) | Age Standardized Disability Adjusted Life Years (per 100,000) |
|-------------------|-----------------------------------------|--------------------------------------------|-------------------------------------------------------------|-----------------------------------|----------------------------------|---------------------------------------------------|-------------------------------------------|----------------------------------------------|---------------------------------------------------------------|
| <b>Global</b>     | 2,849.31<br>(1,875.22, 3,983.94)        | 38.66<br>(25.44, 54.05)                    | 40.97 (26.84, 57.11)                                        | 8,587.74<br>(6,355.78, 10,772.24) | 116.51<br>(86.23, 146.14)        | 122.71<br>(90.36, 153.52)                         | 11,445.40<br>(8,380.25, 14,554.09)        | 155.27<br>(113.69, 197.45)                   | 163.69<br>(120.58, 207.28)                                    |
| <b>China</b>      | 462.21<br>(304.57, 647.27)              | 33.41<br>(22.01, 46.79)                    | 29.12 (19.36, 41.01)                                        | 1,188.22<br>(870.96, 1,501.83)    | 85.89<br>(62.95, 108.56)         | 76.18 (55.93, 96.49)                              | 1,651.72<br>(1,212.35, 2,103.21)          | 119.39<br>(87.63, 152.02)                    | 105.79<br>(77.30, 133.98)                                     |
| <b>India</b>      | 447.47<br>(289.00, 638.28)              | 34.12<br>(22.03, 48.66)                    | 45.40 (29.19, 64.54)                                        | 2,048.91<br>(1,471.02, 2,662.61)  | 156.21<br>(112.15, 203.00)       | 192.55<br>(138.73, 249.04)                        | 2,502.15<br>(1,827.96, 3,204.77)          | 190.77<br>(139.37, 244.33)                   | 238.25<br>(173.90, 303.98)                                    |
| <b>US</b>         | 61.54<br>(32.36, 105.07)                | 19.02<br>(10.00, 32.48)                    | 14.51 (7.59, 24.72)                                         | 104.78<br>(58.14, 165.08)         | 32.39<br>(17.97, 51.03)          | 23.30 (12.96, 36.77)                              | 166.61<br>(91.84, 264.98)                 | 51.50<br>(28.39, 81.90)                      | 37.92 (20.91, 60.47)                                          |
| <b>Indonesia</b>  | 40.67<br>(25.55, 60.13)                 | 15.79<br>(9.92, 23.34)                     | 20.02 (12.80, 29.32)                                        | 224.57<br>(158.94, 297.66)        | 87.17<br>(61.70, 115.54)         | 102.00<br>(72.07, 134.72)                         | 265.23<br>(186.14, 351.41)                | 102.95<br>(72.25, 136.41)                    | 122.19<br>(86.18, 162.36)                                     |
| <b>Brazil</b>     | 25.72<br>(15.29, 39.59)                 | 12.38<br>(7.36, 19.05)                     | 13.55 (8.11, 20.94)                                         | 98.88<br>(65.54, 139.27)          | 47.57<br>(31.53, 67.01)          | 51.17 (34.05, 72.01)                              | 124.85<br>(82.57, 176.65)                 | 60.07<br>(39.72, 84.99)                      | 64.76 (42.92, 91.88)                                          |
| <b>Pakistan</b>   | 47.74<br>(30.60, 68.12)                 | 25.25<br>(16.19, 36.03)                    | 39.99 (25.77, 56.99)                                        | 292.68<br>(174.43, 434.38)        | 154.81<br>(92.27, 229.76)        | 215.59<br>(123.95, 322.52)                        | 342.45<br>(213.87, 492.17)                | 181.14<br>(113.12, 260.33)                   | 254.25<br>(157.33, 365.23)                                    |
| <b>Nigeria</b>    | 61.22<br>(38.09, 88.68)                 | 33.55<br>(20.87, 48.59)                    | 71.93 (45.61, 103.27)                                       | 57.66<br>(37.92, 80.13)           | 31.60<br>(20.78, 43.91)          | 44.94 (29.23, 62.98)                              | 119.40<br>(82.97, 161.55)                 | 65.43<br>(45.47, 88.52)                      | 117.66<br>(81.05, 158.12)                                     |
| <b>Bangladesh</b> | 51.45<br>(33.04, 72.84)                 | 31.96<br>(20.53, 45.25)                    | 45.58 (28.89, 64.56)                                        | 168.36<br>(121.18, 220.47)        | 104.60<br>(75.28, 136.98)        | 137.57<br>(98.14, 179.69)                         | 220.26<br>(159.56, 283.60)                | 136.84<br>(99.13, 176.20)                    | 183.21<br>(132.76, 236.87)                                    |
| <b>Russia</b>     | 45.31<br>(27.94, 67.45)                 | 30.59<br>(18.86, 45.54)                    | 22.99 (14.08, 34.08)                                        | 54.05<br>(32.23, 81.33)           | 36.49<br>(21.76, 54.91)          | 28.25 (16.88, 42.28)                              | 100.14<br>(66.26, 140.14)                 | 67.61<br>(44.74, 94.61)                      | 51.29 (34.08, 72.60)                                          |
| <b>Japan</b>      | 57.64<br>(36.80, 84.54)                 | 44.92<br>(28.68, 65.89)                    | 21.97 (13.83, 32.50)                                        | 72.08<br>(49.89, 97.36)           | 56.18<br>(38.88, 75.88)          | 23.15 (16.00, 31.22)                              | 129.79<br>(88.75, 178.70)                 | 101.16<br>(69.17, 139.27)                    | 45.26 (30.63, 62.55)                                          |

**Figure Legends:**

**Figure 1a:** Age standardized burden (ABD) of incident chronic kidney disease attributable to PM<sub>2.5</sub> per 100,000 population. ATG, Antigua and Barbuda; FSM, Federated States of Micronesia; Isl, Island; LCA, Saint Lucia; TLS, Timor-Leste; TTO, Trinidad and Tobago; VCT, Saint Vincent and the Grenadines.

**Figure 1b:** Age standardized years living with disability (YLD) due to incident chronic kidney disease attributable to PM<sub>2.5</sub> per 100,000 population. ATG, Antigua and Barbuda; FSM, Federated States of Micronesia; Isl, Island; LCA, Saint Lucia; TLS, Timor-Leste; TTO, Trinidad and Tobago; VCT, Saint Vincent and the Grenadines.

**Figure 1c:** Age standardized years of life lost (YLL) due to incident chronic kidney disease attributable to PM<sub>2.5</sub> per 100,000 population. ATG, Antigua and Barbuda; FSM, Federated States of Micronesia; Isl, Island; LCA, Saint Lucia; TLS, Timor-Leste; TTO, Trinidad and Tobago; VCT, Saint Vincent and the Grenadines.

**Figure 1d:** Age standardized disability adjusted life years (DALYs) due to incident chronic kidney disease attributable to PM<sub>2.5</sub> per 100,000 population. ATG, Antigua and Barbuda; FSM, Federated States of Micronesia; Isl, Island; LCA, Saint Lucia; TLS, Timor-Leste; TTO, Trinidad and Tobago; VCT, Saint Vincent and the Grenadines.

**Figure 2:** Frontier analysis of age standardized disability adjusted life years (DALY) rate per 100,000 population by socio-demographic index (SDI). Countries with the top 10% effective difference are labelled. Countries are colored by region.

**Figure 3:** Plot showing burden of CKD attributable to PM<sub>2.5</sub> in 194 countries and territories. Heat map tracks show percentiles, which from inside to outside represent the YLL, YLD, ABD, effective difference, and DALY. Scatter plot represents the DALYs (in open circles) and effective difference (in closed circles) percentile, with a reference line at the median. Values are graded, from low to high, as blue to red (on the Brewer palette). Countries are represented by their 3-character country code. Regions are ordered from low to high burden clockwise. NA=North America.

1 **Supplemental Figure 1:** Frontier analysis of risk deleted cause specific age standardized disability adjusted  
2 life years (DALY) rate per 100,000 population by socio-demographic index (SDI). Countries with the top 10%  
3 effective difference are labelled. Countries are colored by region.  
4  
5  
6

7 **Supplemental Figure 2:** Age-standardized CKD DALYs (per 100,000) attributable to PM<sub>2.5</sub> by World Bank  
8 income classification.  
9  
10  
11  
12  
13  
14  
15  
16  
17  
18  
19  
20  
21  
22  
23  
24  
25  
26  
27  
28  
29  
30  
31  
32  
33  
34  
35  
36  
37  
38  
39  
40  
41  
42  
43  
44  
45  
46  
47  
48  
49  
50  
51  
52  
53  
54  
55  
56  
57  
58  
59  
60

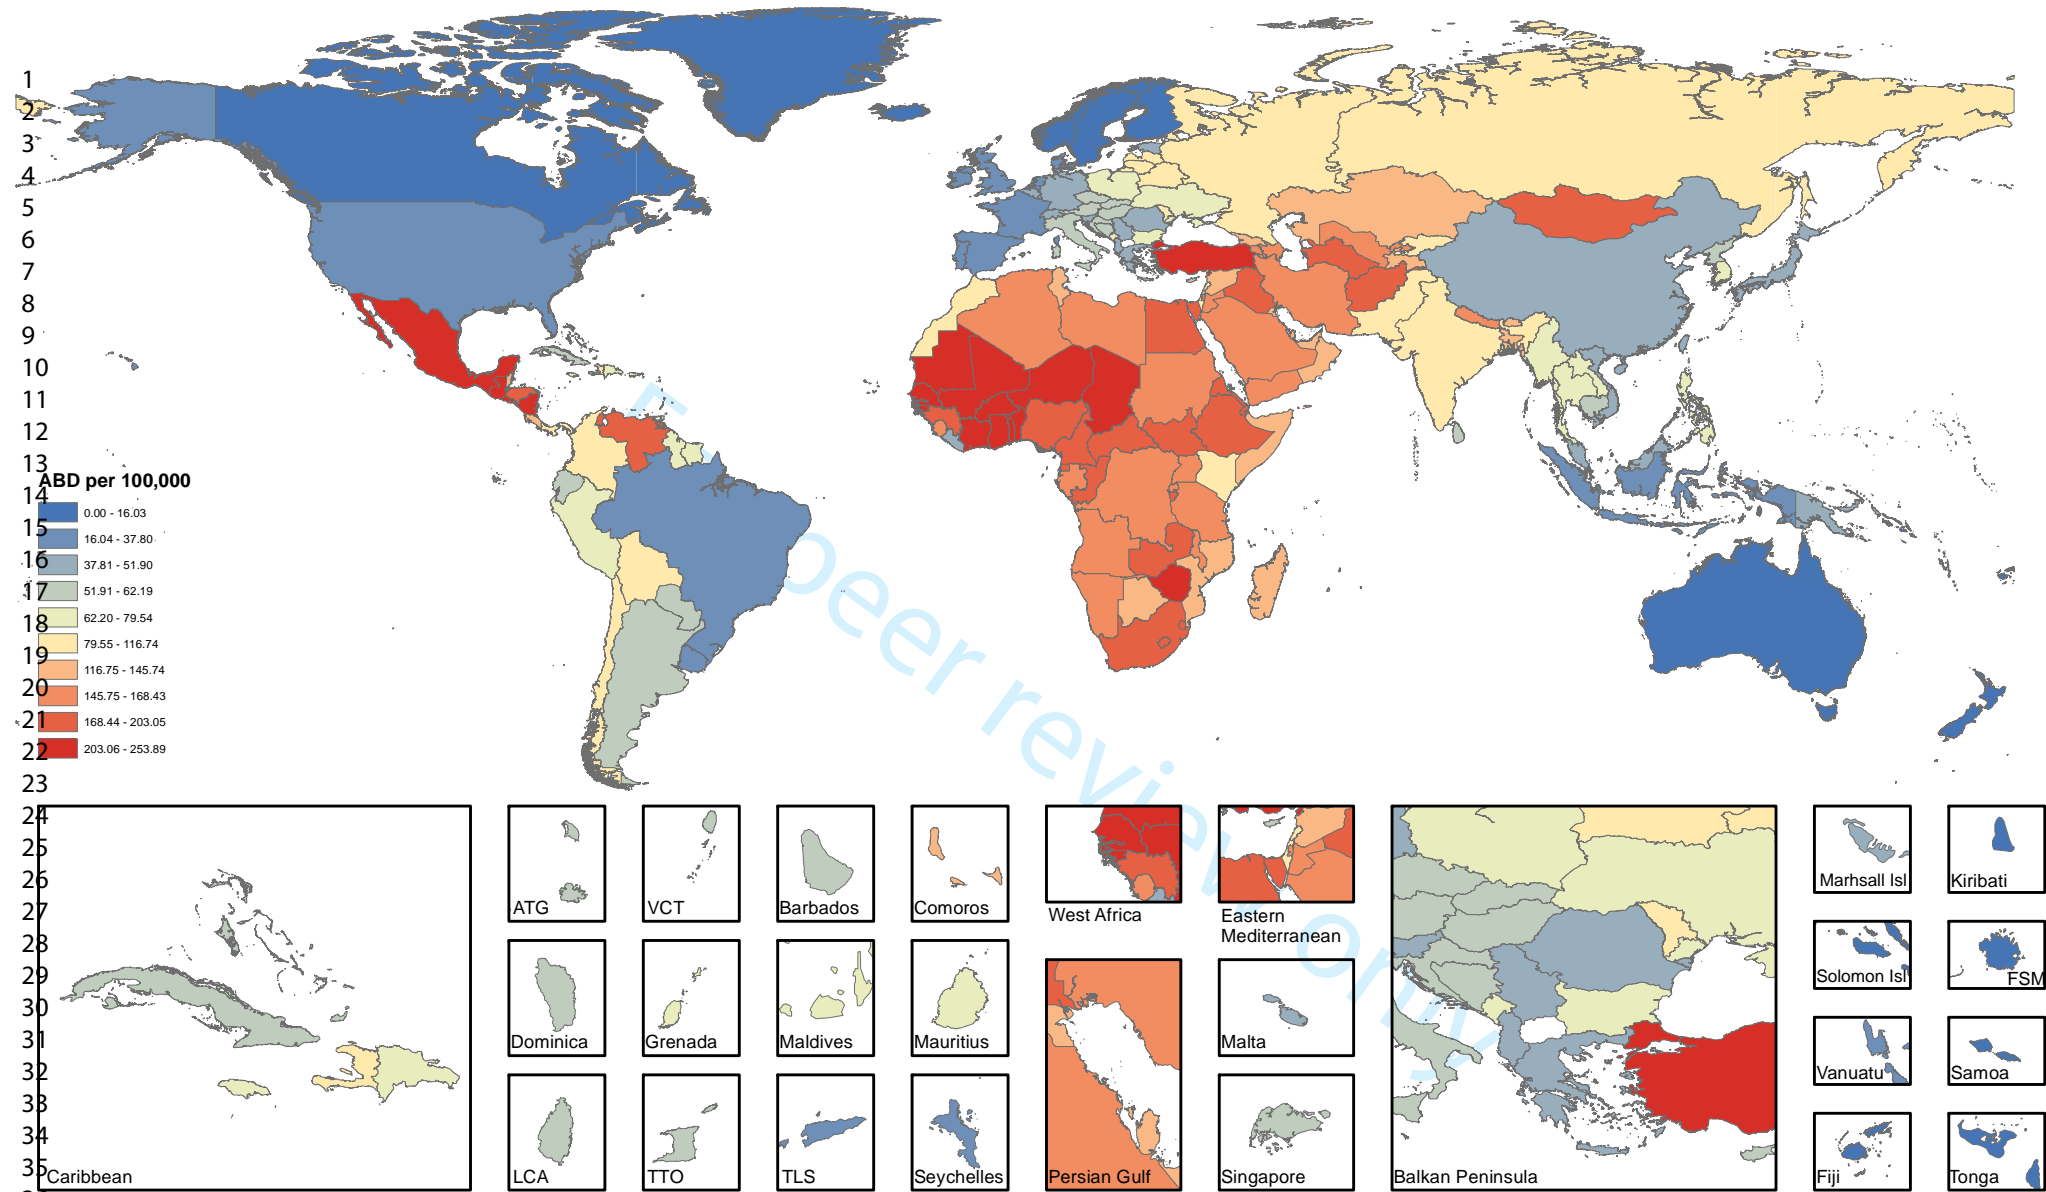

Figure 1a



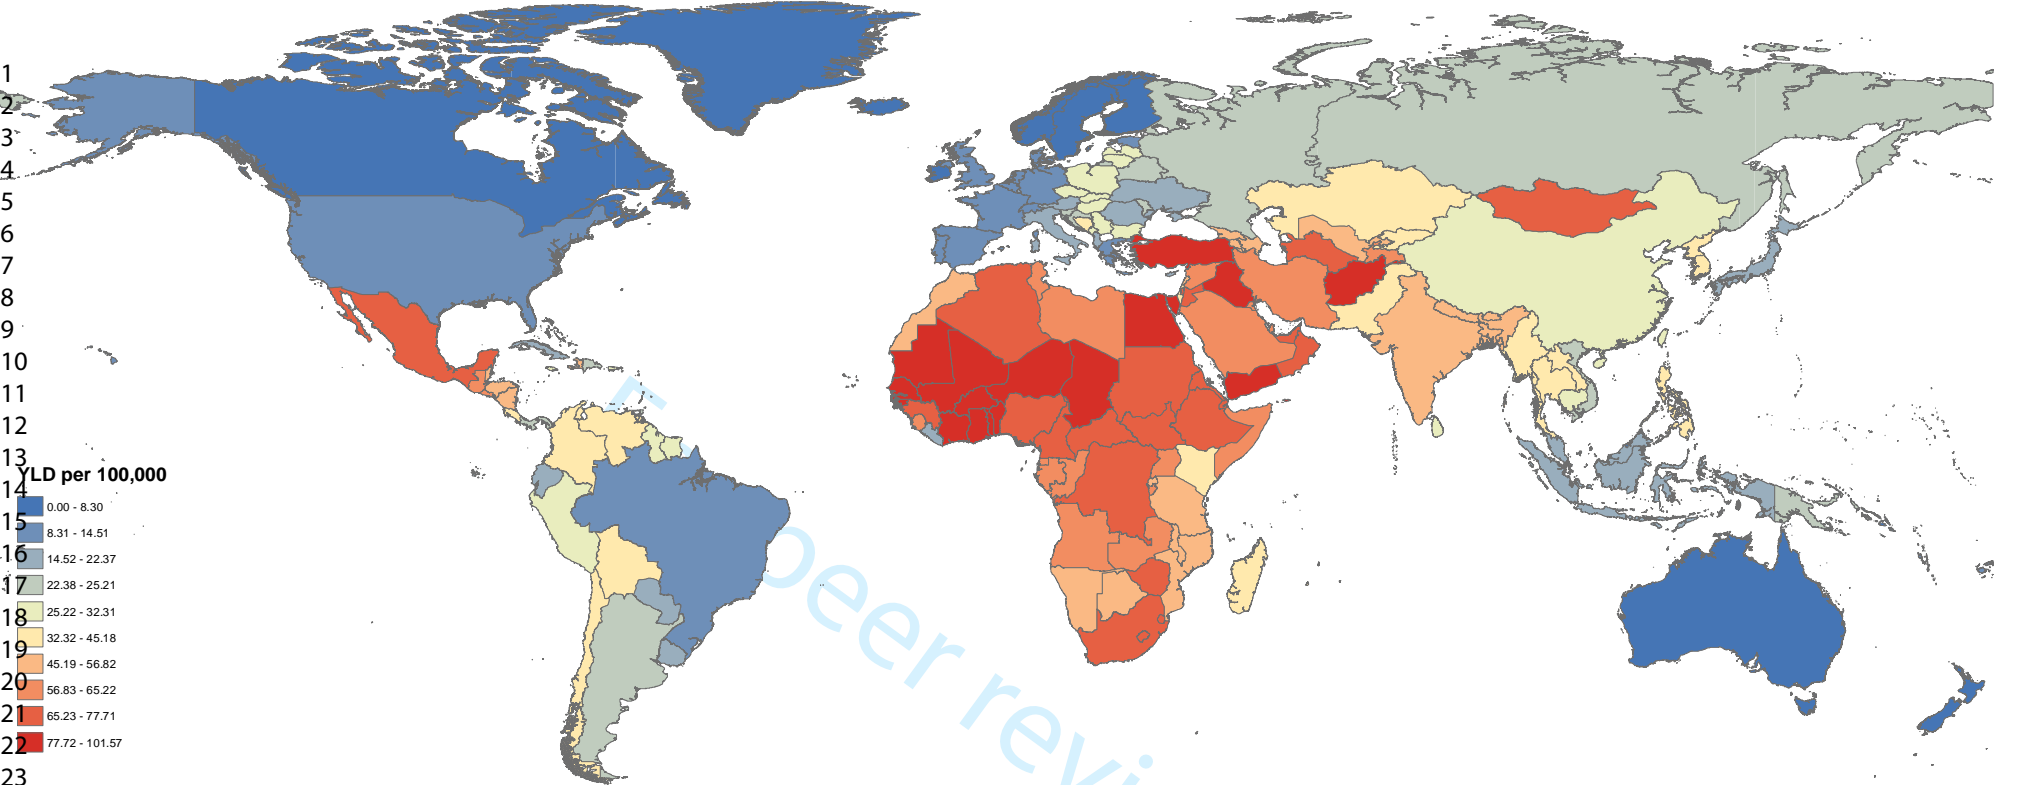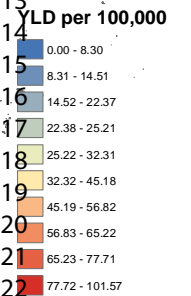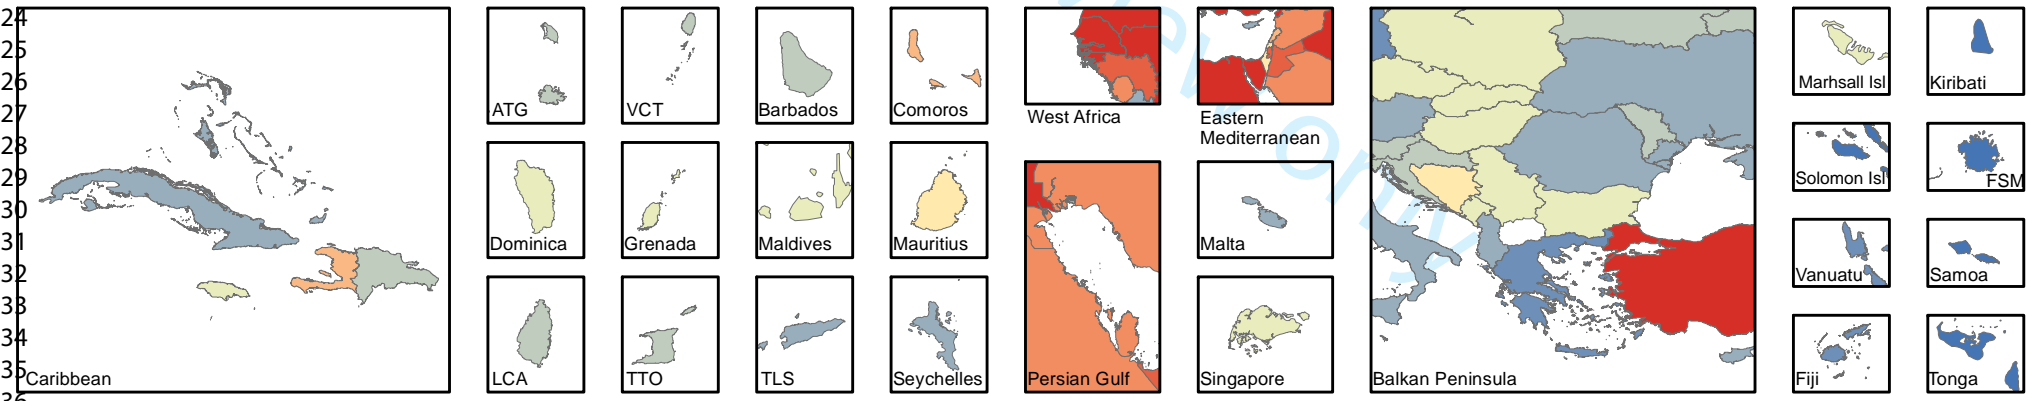

Figure 1b

23  
24  
25  
26  
27  
28  
29  
30  
31  
32  
33  
34  
35  
36  
37  
38  
39  
40  
41  
42  
43  
44  
45  
46  
47

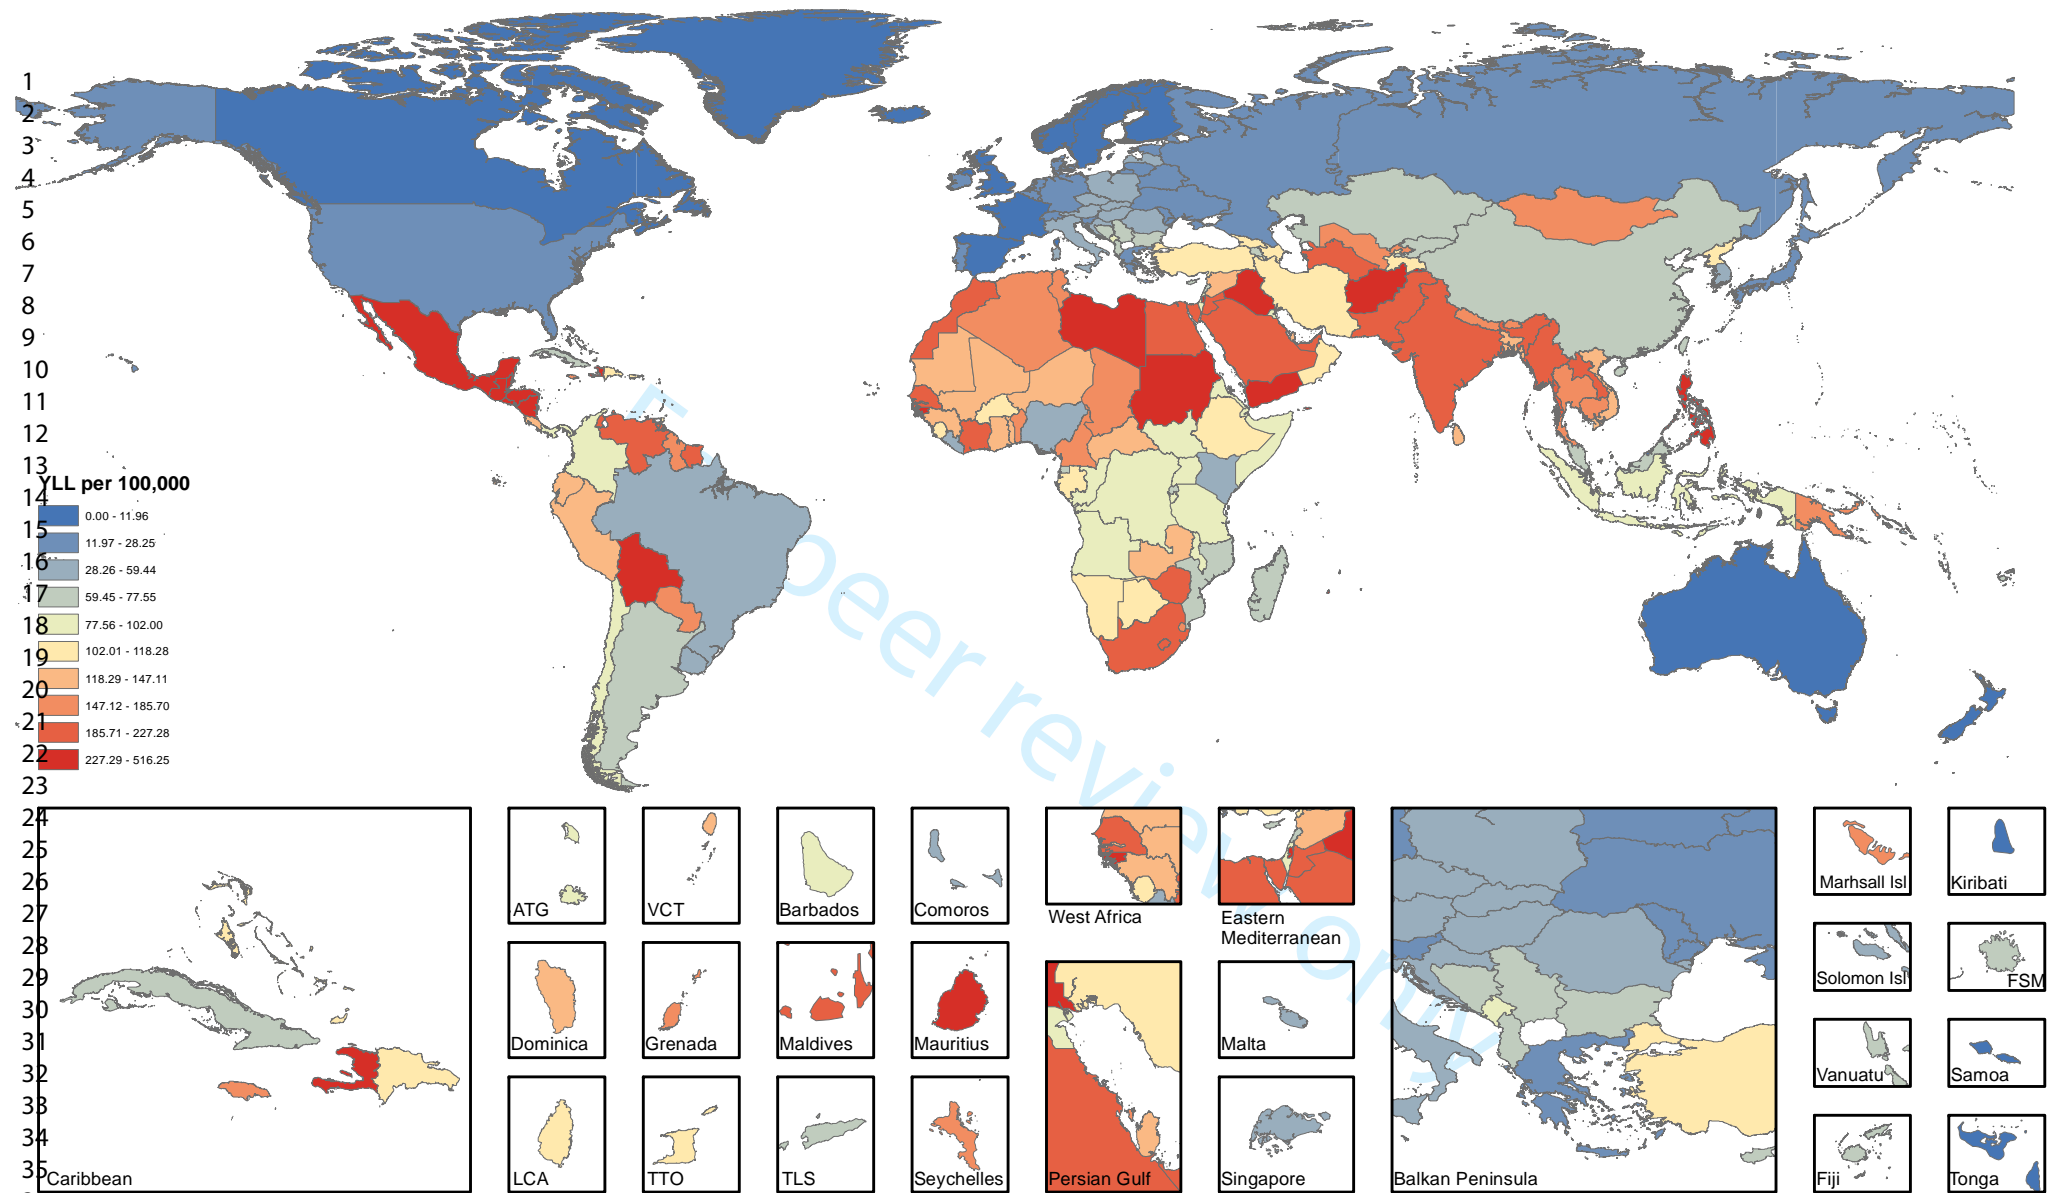

Figure 1c

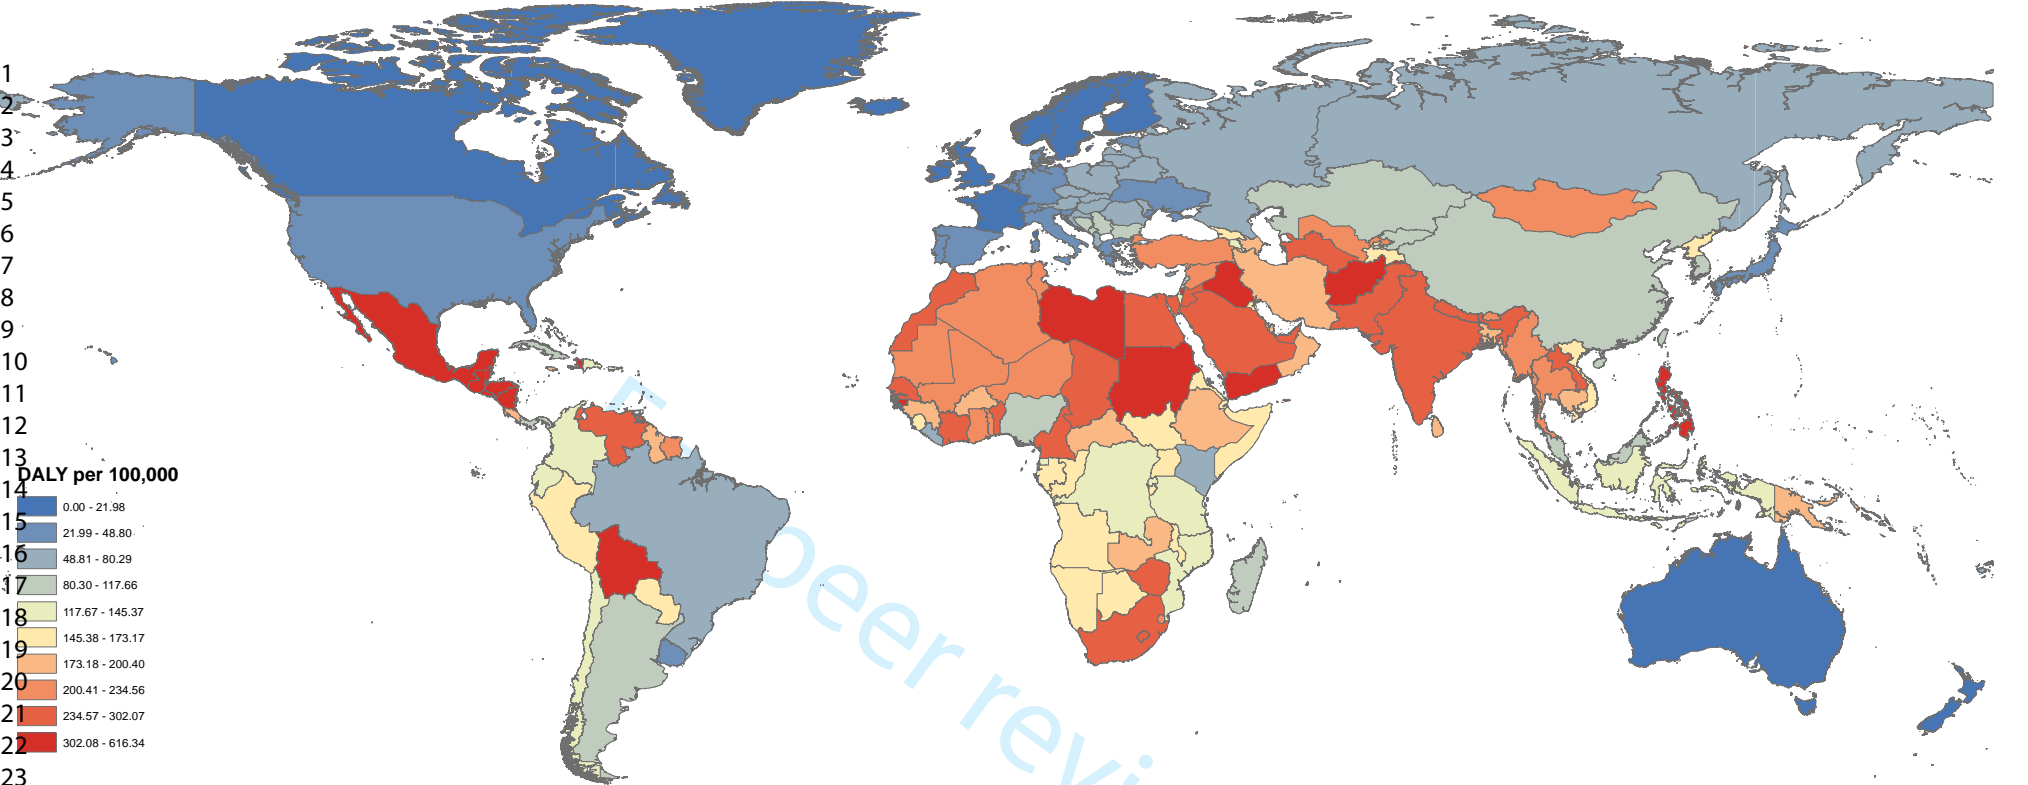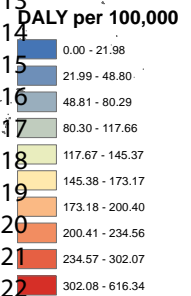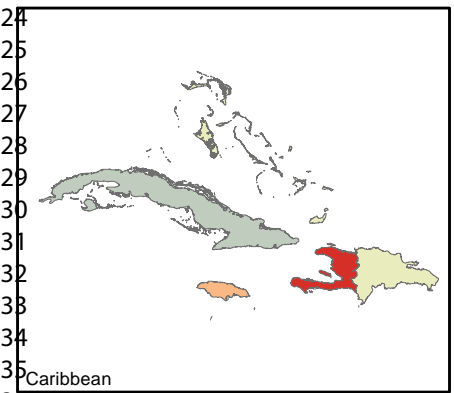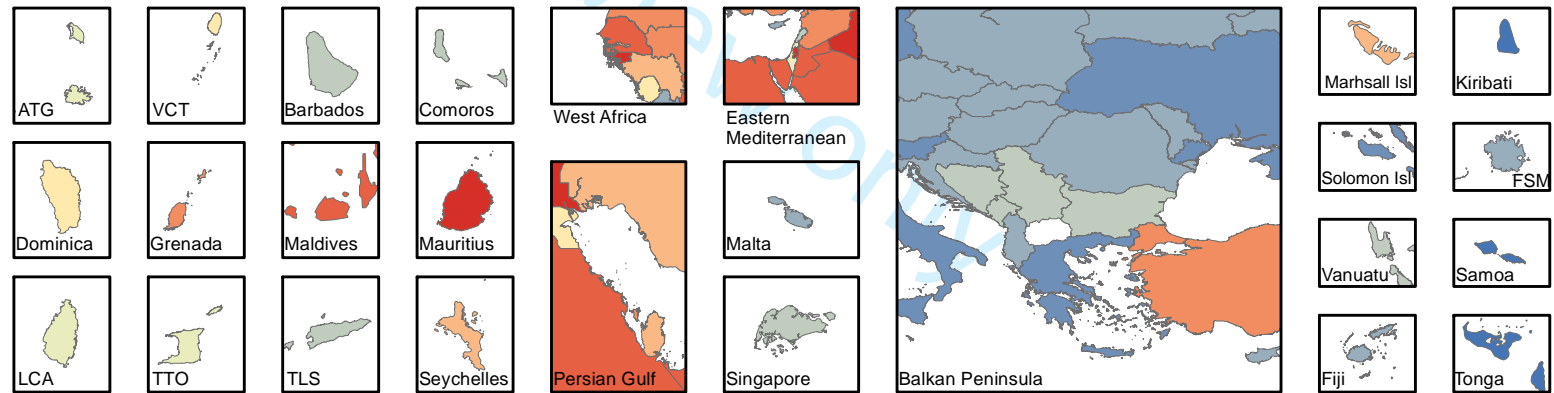

Figure 1d

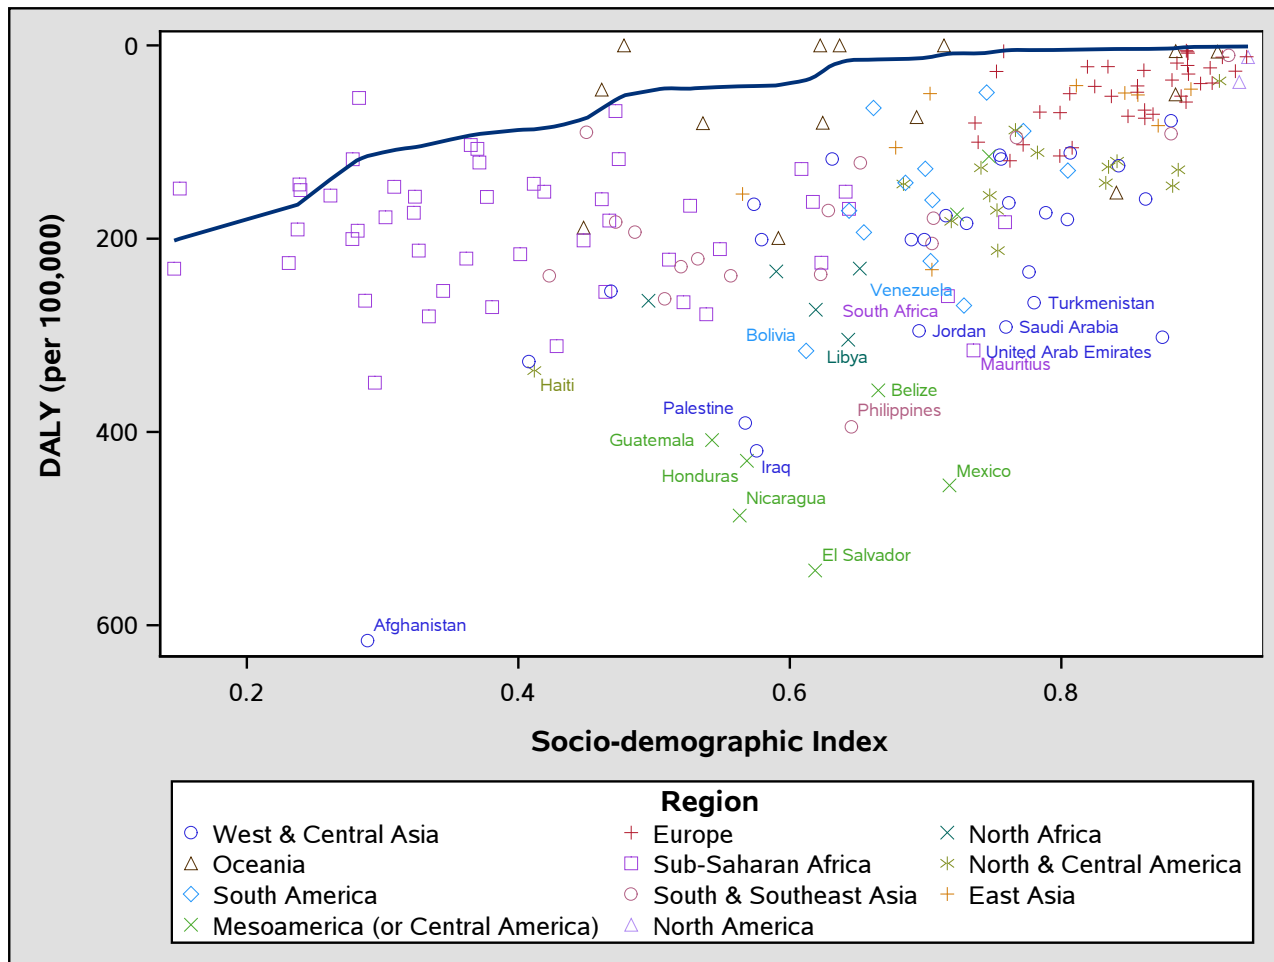

Figure 2

1  
2  
3  
4  
5  
6  
7  
8  
9  
10  
11  
12  
13  
14  
15  
16  
17  
18  
19  
20  
21  
22  
23  
24  
25  
26  
27  
28  
29  
30  
31  
32  
33  
34  
35  
36  
37  
38  
39  
40  
41  
42  
43  
44  
45  
46  
47  
48  
49  
50  
51  
52  
53  
54  
55  
56  
57  
58  
59  
60

Figure 3

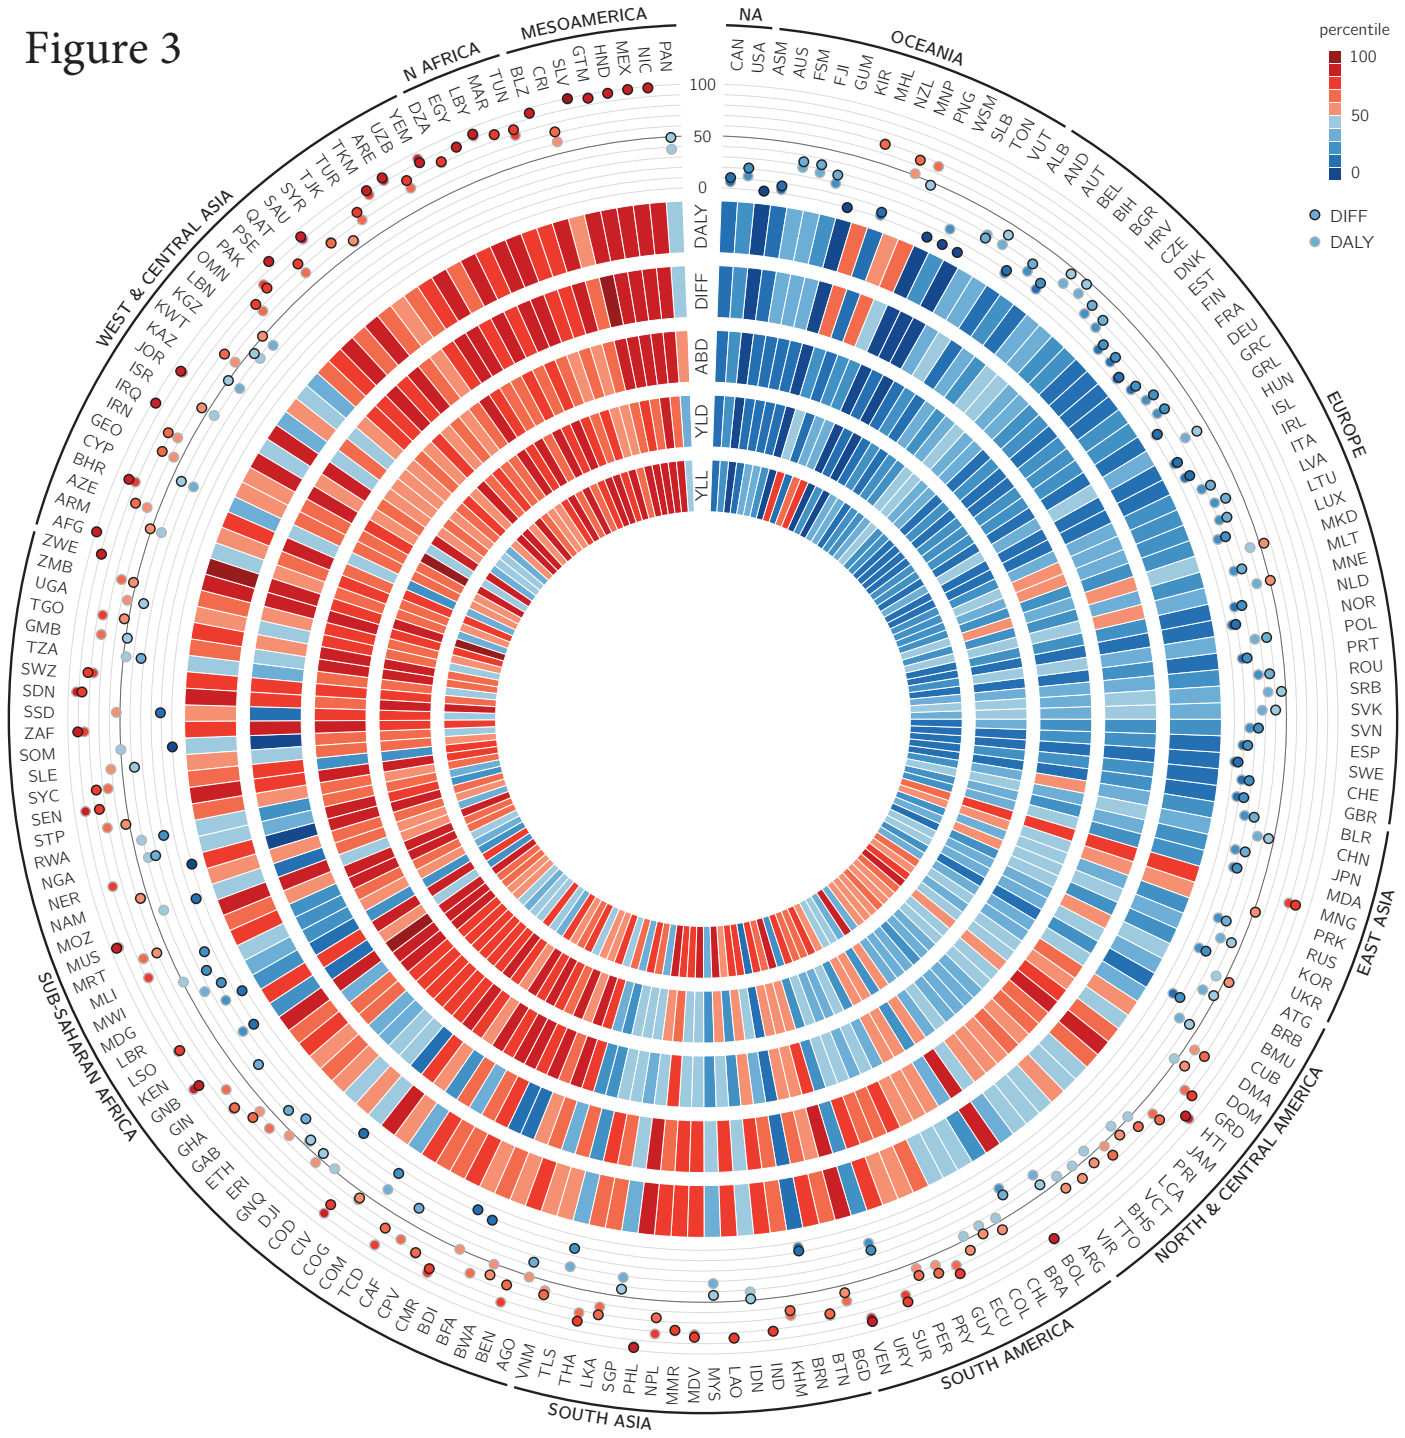

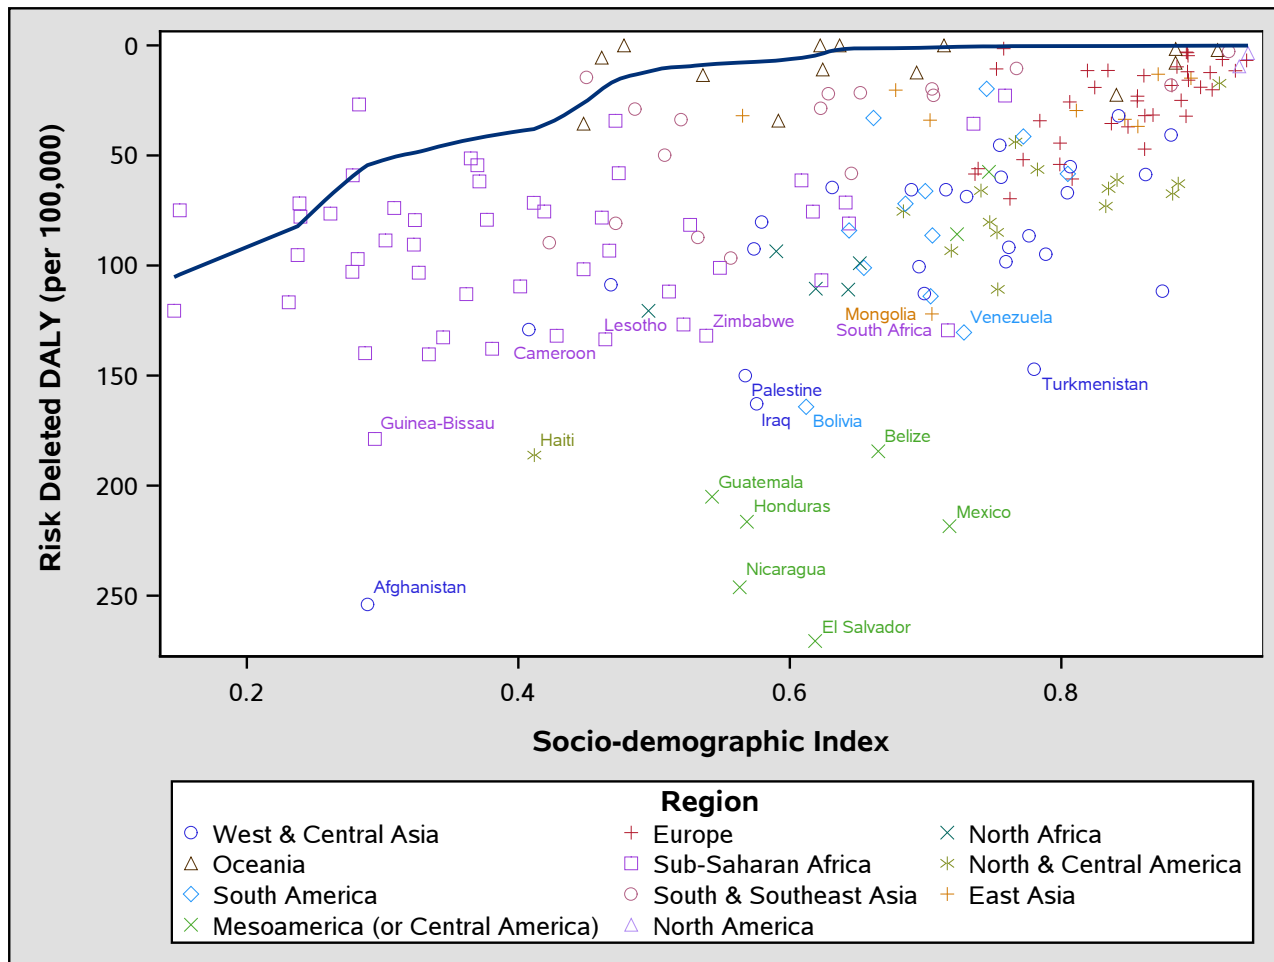

Supplemental Figure 1

1  
2  
3  
4  
5  
6  
7  
8  
9  
10  
11  
12  
13  
14  
15  
16  
17  
18  
19  
20  
21  
22  
23  
24  
25  
26  
27  
28  
29  
30  
31  
32  
33  
34  
35  
36  
37  
38  
39  
40  
41  
42  
43  
44  
45  
46  
47  
48  
49  
50  
51  
52  
53  
54  
55  
56  
57  
58  
59  
60

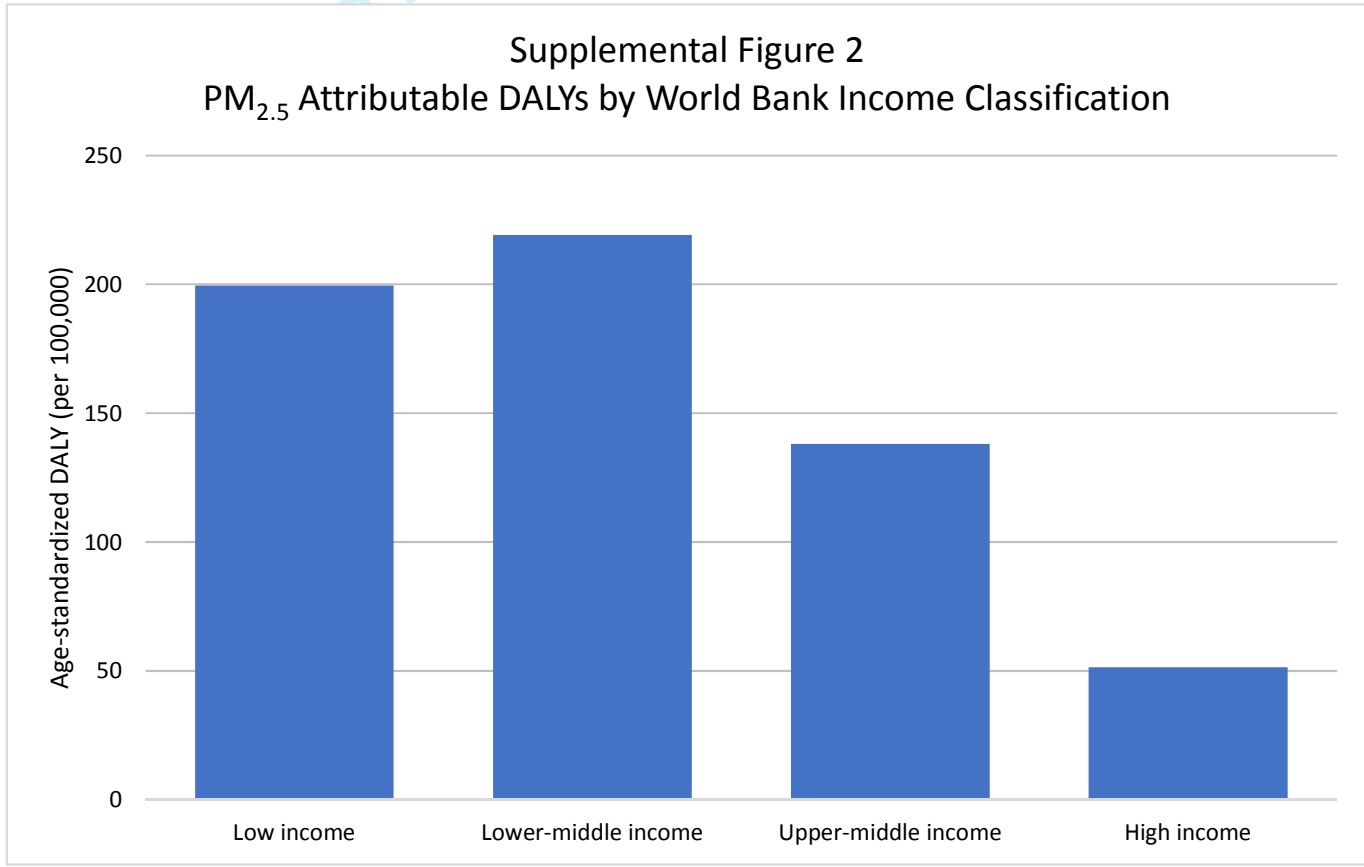



## Supplemental Material:

Supplemental table 1: Country characteristics and attributable burden of incident chronic kidney disease attributable to PM<sub>2.5</sub>

| Country                    | Population (in 100,000s) | PM <sub>2.5</sub> (µg/m <sup>3</sup> ) | ABD (in 1000s)                | ABD (per 100,000)       | Age Standardized ABD (per 100,000) |
|----------------------------|--------------------------|----------------------------------------|-------------------------------|-------------------------|------------------------------------|
| <b>Global</b>              | 73710.68                 | 42.27353                               | 6,950.51 (5,061.53, 8,914.74) | 94.29 (68.67, 120.94)   | 101.39 (74.49, 129.69)             |
| <b>Afghanistan</b>         | 326.08                   | 46.1                                   | 30.62 (22.13, 39.33)          | 93.91 (67.87, 120.62)   | 191.88 (138.69, 250.09)            |
| <b>Albania</b>             | 28.96                    | 17.1                                   | 1.65 (1.17, 2.18)             | 56.86 (40.23, 75.34)    | 46.27 (32.73, 60.97)               |
| <b>Algeria</b>             | 396.35                   | 30.9                                   | 46.28 (33.81, 59.58)          | 116.77 (85.31, 150.32)  | 148.29 (108.18, 191.08)            |
| <b>American Samoa</b>      | 0.83                     | 3.7                                    | 0.00 (0.00, 0.00)             | 0.00 (0.00, 5.89)       | 0.00 (0.00, 10.24)                 |
| <b>Andorra</b>             | 0.79                     | 9.7                                    | 0.03 (0.02, 0.04)             | 33.65 (20.56, 51.06)    | 18.26 (11.18, 27.50)               |
| <b>Angola</b>              | 252.51                   | 29.1                                   | 18.63 (13.45, 23.93)          | 73.78 (53.28, 94.77)    | 167.03 (120.40, 218.54)            |
| <b>Antigua and Barbuda</b> | 0.92                     | 12.8                                   | 0.05 (0.03, 0.07)             | 52.16 (35.28, 72.37)    | 56.86 (38.55, 78.89)               |
| <b>Argentina</b>           | 434.13                   | 13                                     | 25.33 (17.07, 35.06)          | 58.35 (39.31, 80.76)    | 54.36 (37.06, 75.23)               |
| <b>Armenia</b>             | 30.08                    | 21.2                                   | 5.14 (3.62, 6.79)             | 170.82 (120.49, 225.62) | 146.08 (104.36, 192.99)            |
| <b>Australia</b>           | 243.22                   | 5.8                                    | 3.00 (0.00, 6.77)             | 12.32 (0.00, 27.83)     | 8.58 (0.00, 19.34)                 |
| <b>Austria</b>             | 86.70                    | 16.7                                   | 8.46 (5.94, 11.25)            | 97.63 (68.55, 129.71)   | 55.12 (38.79, 72.98)               |
| <b>Azerbaijan</b>          | 97.82                    | 25.6                                   | 13.61 (9.72, 17.82)           | 139.17 (99.35, 182.22)  | 162.21 (116.83, 212.80)            |
| <b>Bahrain</b>             | 13.67                    | 54.4                                   | 1.18 (0.86, 1.53)             | 86.54 (62.67, 112.18)   | 134.55 (97.69, 173.40)             |
| <b>Bangladesh</b>          | 1609.58                  | 87                                     | 136.17 (99.56, 174.46)        | 84.60 (61.86, 108.39)   | 121.08 (88.55, 156.18)             |
| <b>Barbados</b>            | 2.84                     | 14.1                                   | 0.23 (0.16, 0.31)             | 80.43 (55.70, 110.22)   | 58.71 (40.65, 79.70)               |
| <b>Belarus</b>             | 96.12                    | 17.9                                   | 12.27 (8.63, 16.39)           | 127.67 (89.75, 170.57)  | 90.45 (63.46, 120.31)              |
| <b>Belgium</b>             | 113.33                   | 15.3                                   | 8.55 (5.98, 11.60)            | 75.47 (52.75, 102.36)   | 43.74 (30.54, 59.11)               |
| <b>Belize</b>              | 3.59                     | 23.2                                   | 0.25 (0.18, 0.32)             | 69.68 (50.71, 89.18)    | 119.56 (86.74, 154.56)             |
| <b>Benin</b>               | 109.14                   | 29.1                                   | 13.03 (9.45, 16.83)           | 119.42 (86.55,          | 221.80 (158.67,                    |



|                                 |          |      |                         |                         |                         |
|---------------------------------|----------|------|-------------------------|-------------------------|-------------------------|
|                                 |          |      |                         | 154.23)                 | 288.49)                 |
| <b>Bermuda</b>                  | 0.67     | 8.5  | 0.02 (0.01, 0.03)       | 23.70 (13.38, 37.60)    | 24.27 (13.58, 38.49)    |
| <b>Bhutan</b>                   | 7.75     | 54.1 | 0.63 (0.46, 0.81)       | 81.62 (59.15, 105.14)   | 117.58 (85.02, 151.93)  |
| <b>Bolivia</b>                  | 107.67   | 27.1 | 7.88 (5.73, 10.12)      | 73.15 (53.26, 93.97)    | 103.87 (75.28, 133.54)  |
| <b>Bosnia and Herzegovina</b>   | 38.11    | 45.3 | 3.47 (2.50, 4.50)       | 91.07 (65.52, 118.05)   | 61.29 (44.32, 79.04)    |
| <b>Botswana</b>                 | 22.59    | 15.4 | 2.05 (1.42, 2.76)       | 90.88 (62.78, 122.29)   | 141.70 (98.19, 191.81)  |
| <b>Brazil</b>                   | 2078.47  | 11.1 | 69.03 (45.11, 99.44)    | 33.21 (21.70, 47.84)    | 36.57 (23.68, 52.72)    |
| <b>Brunei</b>                   | 4.23     | 5    | 0.01 (0.00, 0.05)       | 3.42 (0.00, 11.43)      | 5.19 (0.00, 17.16)      |
| <b>Bulgaria</b>                 | 72.68    | 27.5 | 7.64 (5.50, 9.91)       | 105.13 (75.64, 136.35)  | 62.62 (45.69, 80.52)    |
| <b>Burkina Faso</b>             | 180.94   | 33.6 | 18.04 (13.04, 23.17)    | 99.72 (72.06, 128.05)   | 207.57 (150.31, 269.84) |
| <b>Burundi</b>                  | 112.47   | 37.1 | 9.66 (7.00, 12.41)      | 85.85 (62.26, 110.31)   | 177.62 (128.26, 231.63) |
| <b>Cambodia</b>                 | 155.92   | 23.9 | 5.78 (4.23, 7.39)       | 37.07 (27.10, 47.42)    | 56.89 (41.44, 72.76)    |
| <b>Cameroon</b>                 | 234.01   | 64   | 24.23 (17.60, 31.15)    | 103.53 (75.22, 133.13)  | 198.36 (144.84, 256.55) |
| <b>Canada</b>                   | 361.46   | 7    | 8.34 (3.40, 15.08)      | 23.07 (9.40, 41.72)     | 15.02 (6.10, 27.17)     |
| <b>Cape Verde</b>               | 5.20     | 35.2 | 0.75 (0.54, 0.96)       | 143.34 (104.72, 184.95) | 214.86 (154.68, 277.73) |
| <b>Central African Republic</b> | 49.03    | 38.3 | 4.79 (3.47, 6.14)       | 97.60 (70.67, 125.21)   | 171.43 (124.31, 223.21) |
| <b>Chad</b>                     | 140.63   | 39.6 | 14.46 (10.50, 18.54)    | 102.83 (74.64, 131.86)  | 220.58 (157.76, 287.17) |
| <b>Chile</b>                    | 179.48   | 20.6 | 18.72 (13.36, 24.39)    | 104.29 (74.42, 135.90)  | 91.45 (65.70, 118.71)   |
| <b>China</b>                    | 13834.71 | 57.2 | 766.73 (558.72, 985.14) | 55.42 (40.39, 71.21)    | 48.98 (35.52, 63.01)    |
| <b>Colombia</b>                 | 482.64   | 17.6 | 49.09 (34.74, 65.16)    | 101.71 (71.98, 135.00)  | 116.74 (82.49, 155.15)  |
| <b>Comoros</b>                  | 7.92     | 16.1 | 0.50 (0.35, 0.67)       | 63.64 (44.53, 84.92)    | 117.38 (81.93, 157.82)  |
| <b>Congo</b>                    | 46.29    | 42.3 | 4.48 (3.28, 5.75)       | 96.77 (70.88, 124.13)   | 176.51 (127.77, 229.52) |
| <b>Costa Rica</b>               | 48.09    | 19.7 | 6.86 (4.89, 9.01)       | 142.69 (101.73, 187.28) | 143.54 (102.27, 187.39) |

|                                         |        |      |                        |                         |                         |
|-----------------------------------------|--------|------|------------------------|-------------------------|-------------------------|
| <b>Cote d'Ivoire</b>                    | 226.88 | 19.8 | 26.91 (19.33, 35.11)   | 118.62 (85.19, 154.73)  | 214.13 (152.49, 280.67) |
| <b>Croatia</b>                          | 42.41  | 21.2 | 4.09 (2.91, 5.35)      | 96.50 (68.56, 126.11)   | 57.30 (41.40, 74.38)    |
| <b>Cuba</b>                             | 113.93 | 16.4 | 8.51 (5.99, 11.35)     | 74.69 (52.60, 99.60)    | 54.54 (38.26, 72.87)    |
| <b>Cyprus</b>                           | 8.92   | 17.9 | 0.75 (0.52, 0.99)      | 83.56 (58.73, 111.25)   | 61.89 (43.91, 82.30)    |
| <b>Czech Republic</b>                   | 106.97 | 21   | 9.13 (6.57, 11.84)     | 85.32 (61.46, 110.71)   | 53.89 (39.00, 69.54)    |
| <b>Democratic Republic of the Congo</b> | 774.14 | 38.7 | 59.51 (43.52, 76.68)   | 76.87 (56.22, 99.06)    | 160.32 (115.41, 208.74) |
| <b>Denmark</b>                          | 57.11  | 10.7 | 2.62 (1.68, 3.83)      | 45.79 (29.35, 67.00)    | 27.06 (17.47, 39.28)    |
| <b>Djibouti</b>                         | 8.90   | 39.1 | 0.90 (0.65, 1.16)      | 101.59 (73.49, 130.67)  | 168.86 (121.39, 218.42) |
| <b>Dominica</b>                         | 0.72   | 12.5 | 0.04 (0.03, 0.06)      | 58.81 (39.96, 82.15)    | 60.71 (41.15, 84.09)    |
| <b>Dominican Republic</b>               | 105.30 | 18.3 | 6.27 (4.47, 8.19)      | 59.57 (42.47, 77.75)    | 75.11 (53.80, 98.40)    |
| <b>Ecuador</b>                          | 161.54 | 12.5 | 6.81 (4.60, 9.48)      | 42.14 (28.51, 58.65)    | 54.52 (36.79, 75.88)    |
| <b>Egypt</b>                            | 911.48 | 99.5 | 115.58 (84.09, 148.52) | 126.81 (92.26, 162.95)  | 172.28 (124.99, 221.03) |
| <b>El Salvador</b>                      | 61.37  | 35.5 | 12.72 (9.33, 16.10)    | 207.27 (152.01, 262.25) | 243.44 (178.28, 309.30) |
| <b>Equatorial Guinea</b>                | 8.45   | 34   | 0.88 (0.63, 1.15)      | 103.85 (74.40, 135.90)  | 168.82 (121.56, 218.53) |
| <b>Eritrea</b>                          | 52.42  | 35.3 | 4.44 (3.22, 5.72)      | 84.61 (61.49, 109.10)   | 174.25 (125.86, 225.66) |
| <b>Estonia</b>                          | 13.54  | 9.1  | 1.00 (0.58, 1.55)      | 73.50 (42.99, 114.07)   | 44.54 (26.14, 69.71)    |
| <b>Ethiopia</b>                         | 994.32 | 30.1 | 91.51 (66.04, 117.62)  | 92.04 (66.42, 118.29)   | 175.10 (126.30, 227.38) |
| <b>Federated States of Micronesia</b>   | 1.05   | 6.1  | 0.01 (0.00, 0.02)      | 9.86 (1.48, 20.72)      | 15.19 (2.27, 31.50)     |
| <b>Fiji</b>                             | 8.92   | 6    | 0.12 (0.01, 0.26)      | 13.54 (1.36, 29.07)     | 16.03 (1.64, 34.27)     |
| <b>Finland</b>                          | 55.50  | 7.2  | 1.05 (0.46, 1.85)      | 19.00 (8.29, 33.37)     | 10.38 (4.56, 18.38)     |
| <b>France</b>                           | 652.32 | 12.1 | 33.11 (21.98, 46.89)   | 50.76 (33.69, 71.89)    | 28.24 (18.87, 39.78)    |
| <b>Gabon</b>                            | 17.26  | 31.3 | 1.82 (1.32, 2.34)      | 105.61 (76.30, 135.79)  | 168.43 (121.79, 218.50) |
| <b>Georgia</b>                          | 40.04  | 19.7 | 6.69 (4.78, 8.74)      | 167.15 (119.41, 218.39) | 132.27 (93.99, 172.71)  |
| <b>Germany</b>                          | 836.28 | 13.7 | 70.93 (47.89, 98.80)   | 84.82 (57.26, 118.14)   | 42.05 (28.94, 57.72)    |

|                      |          |      |                             |                         |                         |
|----------------------|----------|------|-----------------------------|-------------------------|-------------------------|
| <b>Ghana</b>         | 274.17   | 21.7 | 35.82 (26.00, 46.10)        | 130.65 (94.84, 168.16)  | 219.77 (158.78, 286.91) |
| <b>Greece</b>        | 109.22   | 13.2 | 8.16 (5.53, 11.34)          | 74.69 (50.68, 103.84)   | 38.26 (26.00, 52.72)    |
| <b>Greenland</b>     | 0.54     | 5.2  | 0.00 (0.00, 0.01)           | 5.33 (0.00, 15.58)      | 6.07 (0.00, 17.59)      |
| <b>Grenada</b>       | 1.07     | 14   | 0.06 (0.04, 0.08)           | 58.26 (40.14, 79.38)    | 70.08 (47.80, 96.05)    |
| <b>Guam</b>          | 1.70     | 6.8  | 0.03 (0.01, 0.05)           | 15.82 (5.83, 29.24)     | 16.30 (5.94, 29.82)     |
| <b>Guatemala</b>     | 163.55   | 33.9 | 19.67 (14.34, 25.39)        | 120.29 (87.70, 155.27)  | 209.74 (152.42, 272.81) |
| <b>Guinea</b>        | 125.74   | 19.3 | 13.72 (9.81, 17.89)         | 109.14 (78.05, 142.26)  | 195.33 (139.44, 258.00) |
| <b>Guinea-Bissau</b> | 18.48    | 26   | 2.72 (1.98, 3.50)           | 147.24 (107.14, 189.25) | 253.89 (183.23, 327.77) |
| <b>Guyana</b>        | 7.70     | 14.8 | 0.42 (0.29, 0.57)           | 54.46 (37.90, 73.60)    | 69.92 (48.64, 94.71)    |
| <b>Haiti</b>         | 107.21   | 22.1 | 7.40 (5.39, 9.51)           | 69.04 (50.28, 88.68)    | 112.63 (81.88, 145.09)  |
| <b>Honduras</b>      | 80.96    | 36.2 | 9.80 (7.08, 12.66)          | 120.98 (87.47, 156.34)  | 201.06 (144.40, 263.01) |
| <b>Hungary</b>       | 101.68   | 22.6 | 9.99 (7.20, 12.89)          | 98.26 (70.81, 126.78)   | 60.80 (44.16, 78.35)    |
| <b>Iceland</b>       | 3.26     | 7.5  | 0.05 (0.02, 0.09)           | 15.35 (7.31, 26.30)     | 11.32 (5.40, 19.37)     |
| <b>India</b>         | 13116.32 | 72.6 | 1,092.52 (791.38, 1,407.28) | 83.30 (60.34, 107.29)   | 108.21 (77.99, 139.22)  |
| <b>Indonesia</b>     | 2576.21  | 15   | 76.81 (53.66, 103.42)       | 29.81 (20.83, 40.15)    | 37.38 (26.05, 50.06)    |
| <b>Iran</b>          | 790.34   | 42   | 91.01 (65.99, 117.28)       | 115.16 (83.50, 148.39)  | 149.19 (108.02, 191.81) |
| <b>Iraq</b>          | 364.21   | 45.2 | 34.71 (25.24, 44.66)        | 95.31 (69.31, 122.62)   | 188.02 (137.00, 243.23) |
| <b>Ireland</b>       | 47.90    | 9.6  | 1.35 (0.83, 2.04)           | 28.24 (17.35, 42.64)    | 21.79 (13.38, 32.85)    |
| <b>Israel</b>        | 80.49    | 20.7 | 7.79 (5.61, 10.15)          | 96.73 (69.68, 126.13)   | 87.85 (62.89, 113.70)   |
| <b>Italy</b>         | 627.97   | 19.5 | 72.58 (51.77, 95.43)        | 115.58 (82.44, 151.96)  | 56.46 (40.37, 73.98)    |
| <b>Jamaica</b>       | 28.30    | 16.6 | 2.02 (1.43, 2.69)           | 71.31 (50.64, 94.92)    | 75.34 (53.45, 100.21)   |
| <b>Japan</b>         | 1283.06  | 13.1 | 134.56 (91.13, 186.81)      | 104.88 (71.03, 145.60)  | 44.79 (30.61, 61.70)    |
| <b>Jordan</b>        | 75.71    | 38   | 6.94 (5.06, 8.91)           | 91.72 (66.84, 117.67)   | 158.36 (114.70, 206.05) |

|                         |         |      |                         |                         |                         |
|-------------------------|---------|------|-------------------------|-------------------------|-------------------------|
| <b>Kazakhstan</b>       | 175.37  | 17   | 18.92 (13.23, 25.33)    | 107.86 (75.47, 144.46)  | 125.62 (88.13, 168.39)  |
| <b>Kenya</b>            | 461.90  | 15.6 | 22.91 (16.02, 30.63)    | 49.61 (34.68, 66.30)    | 99.34 (69.68, 134.28)   |
| <b>Kiribati</b>         | 1.13    | 3.4  | 0.00 (0.00, 0.01)       | 0.00 (0.00, 4.53)       | 0.00 (0.00, 7.19)       |
| <b>Kuwait</b>           | 39.01   | 65.7 | 2.99 (2.16, 3.87)       | 76.55 (55.33, 99.19)    | 128.44 (93.49, 165.90)  |
| <b>Kyrgyzstan</b>       | 58.94   | 16.1 | 4.19 (2.93, 5.63)       | 71.15 (49.79, 95.51)    | 103.57 (72.70, 139.25)  |
| <b>Laos</b>             | 67.99   | 27.9 | 2.60 (1.90, 3.30)       | 38.18 (27.97, 48.59)    | 64.96 (47.36, 83.09)    |
| <b>Latvia</b>           | 22.12   | 19.8 | 4.22 (2.98, 5.57)       | 190.58 (134.74, 251.78) | 114.09 (81.29, 150.57)  |
| <b>Lebanon</b>          | 57.62   | 31.8 | 6.04 (4.39, 7.77)       | 104.81 (76.23, 134.81)  | 112.01 (81.21, 144.48)  |
| <b>Lesotho</b>          | 21.29   | 18.6 | 2.38 (1.69, 3.13)       | 111.68 (79.43, 146.90)  | 195.68 (137.71, 258.63) |
| <b>Liberia</b>          | 45.08   | 7.4  | 1.17 (0.54, 2.03)       | 25.96 (12.07, 44.95)    | 46.88 (21.90, 81.55)    |
| <b>Libya</b>            | 62.95   | 69.4 | 6.90 (5.00, 8.86)       | 109.60 (79.50, 140.70)  | 149.84 (107.92, 192.76) |
| <b>Lithuania</b>        | 31.53   | 18.6 | 4.98 (3.52, 6.62)       | 157.85 (111.58, 209.91) | 96.99 (68.86, 127.38)   |
| <b>Luxembourg</b>       | 5.56    | 16.2 | 0.37 (0.26, 0.49)       | 65.91 (46.31, 88.37)    | 46.84 (32.97, 62.57)    |
| <b>Macedonia</b>        | 20.78   | 39.4 | 1.59 (1.15, 2.05)       | 76.57 (55.11, 98.54)    | 60.24 (43.70, 77.65)    |
| <b>Madagascar</b>       | 241.92  | 18.7 | 16.14 (11.53, 21.02)    | 66.71 (47.66, 86.88)    | 129.22 (91.66, 171.24)  |
| <b>Malawi</b>           | 172.14  | 21.4 | 12.44 (9.00, 16.02)     | 72.25 (52.30, 93.06)    | 155.47 (111.87, 203.05) |
| <b>Malaysia</b>         | 302.96  | 15.1 | 9.37 (6.58, 12.70)      | 30.91 (21.73, 41.93)    | 38.23 (26.77, 51.34)    |
| <b>Maldives</b>         | 3.63    | 28.5 | 0.16 (0.12, 0.21)       | 44.47 (32.46, 56.71)    | 65.13 (47.34, 82.98)    |
| <b>Mali</b>             | 175.68  | 37.2 | 17.90 (13.06, 22.97)    | 101.91 (74.36, 130.73)  | 215.28 (154.81, 278.99) |
| <b>Malta</b>            | 4.18    | 15.4 | 0.35 (0.24, 0.47)       | 83.52 (57.98, 113.42)   | 48.42 (33.48, 65.19)    |
| <b>Marshall Islands</b> | 0.72    | 9.1  | 0.02 (0.01, 0.03)       | 27.01 (16.13, 41.20)    | 46.11 (27.31, 71.02)    |
| <b>Mauritania</b>       | 40.85   | 68.5 | 5.39 (3.89, 6.93)       | 131.84 (95.23, 169.69)  | 221.28 (159.05, 287.45) |
| <b>Mauritius</b>        | 12.74   | 14.4 | 0.95 (0.66, 1.28)       | 74.40 (51.72, 100.81)   | 64.63 (44.84, 86.96)    |
| <b>Mexico</b>           | 1270.43 | 19.7 | 205.87 (147.95, 269.30) | 162.05 (116.46, 211.98) | 206.44 (147.97, 269.37) |
| <b>Moldova</b>          | 40.65   | 16.7 | 3.99 (2.77, 5.36)       | 98.14 (68.25, 131.75)   | 82.08 (57.78, 110.01)   |

|                                 |         |      |                         |                         |                         |
|---------------------------------|---------|------|-------------------------|-------------------------|-------------------------|
| <b>Mongolia</b>                 | 29.53   | 22.9 | 3.53 (2.55, 4.58)       | 119.47 (86.18, 155.07)  | 182.35 (130.58, 237.33) |
| <b>Montenegro</b>               | 6.26    | 22.7 | 0.57 (0.41, 0.74)       | 91.15 (65.81, 118.31)   | 68.28 (49.58, 88.70)    |
| <b>Morocco</b>                  | 343.73  | 22.4 | 28.75 (20.79, 37.13)    | 83.65 (60.47, 108.03)   | 97.08 (70.31, 125.02)   |
| <b>Mozambique</b>               | 279.91  | 17   | 18.20 (12.87, 24.04)    | 65.02 (45.96, 85.87)    | 130.12 (91.54, 172.57)  |
| <b>Myanmar</b>                  | 540.27  | 53   | 28.44 (20.70, 36.47)    | 52.64 (38.32, 67.51)    | 65.80 (47.73, 84.55)    |
| <b>Namibia</b>                  | 24.53   | 18.6 | 2.10 (1.50, 2.76)       | 85.72 (61.13, 112.35)   | 147.88 (104.50, 196.98) |
| <b>Nepal</b>                    | 285.51  | 70.9 | 33.03 (23.92, 42.72)    | 115.68 (83.79, 149.62)  | 163.61 (118.20, 211.43) |
| <b>Netherlands</b>              | 171.91  | 14.3 | 9.73 (6.73, 13.38)      | 56.63 (39.12, 77.82)    | 33.72 (23.31, 46.04)    |
| <b>New Zealand</b>              | 45.63   | 5.4  | 0.45 (0.00, 1.16)       | 9.76 (0.00, 25.40)      | 6.86 (0.00, 17.63)      |
| <b>Nicaragua</b>                | 60.89   | 23   | 8.80 (6.38, 11.37)      | 144.51 (104.85, 186.69) | 212.72 (153.46, 276.70) |
| <b>Niger</b>                    | 198.54  | 53   | 20.96 (15.19, 27.02)    | 105.56 (76.52, 136.07)  | 215.31 (154.91, 278.75) |
| <b>Nigeria</b>                  | 1824.90 | 36.9 | 195.23 (141.44, 250.95) | 106.98 (77.51, 137.52)  | 200.28 (145.24, 261.20) |
| <b>North Korea</b>              | 251.59  | 27.7 | 15.12 (10.90, 19.59)    | 60.11 (43.32, 77.88)    | 61.34 (44.58, 78.87)    |
| <b>Northern Mariana Islands</b> | 1.16    | 11.3 | 0.02 (0.02, 0.03)       | 20.67 (13.49, 29.40)    | 47.95 (31.41, 68.33)    |
| <b>Norway</b>                   | 51.64   | 8.9  | 1.11 (0.65, 1.74)       | 21.54 (12.50, 33.61)    | 13.87 (8.09, 21.62)     |
| <b>Oman</b>                     | 44.81   | 46.7 | 3.36 (2.44, 4.29)       | 74.90 (54.42, 95.71)    | 131.54 (95.01, 170.75)  |
| <b>Pakistan</b>                 | 1890.55 | 63   | 107.43 (78.85, 137.04)  | 56.83 (41.71, 72.49)    | 89.17 (64.66, 114.14)   |
| <b>Palestine</b>                | 46.73   | 20.1 | 3.83 (2.75, 4.94)       | 81.87 (58.75, 105.74)   | 165.02 (118.93, 215.20) |
| <b>Panama</b>                   | 39.29   | 12.6 | 2.89 (1.94, 4.05)       | 73.68 (49.45, 103.06)   | 85.49 (57.25, 120.64)   |
| <b>Papua New Guinea</b>         | 76.33   | 10.4 | 1.86 (1.19, 2.72)       | 24.39 (15.57, 35.63)    | 43.51 (27.83, 63.68)    |
| <b>Paraguay</b>                 | 66.53   | 14.3 | 2.90 (1.99, 3.95)       | 43.61 (29.95, 59.33)    | 61.17 (41.81, 82.87)    |
| <b>Peru</b>                     | 313.93  | 27.1 | 19.31 (14.05, 24.91)    | 61.52 (44.75, 79.35)    | 79.54 (57.72, 103.29)   |
| <b>Philippines</b>              | 1008.03 | 22.8 | 54.04 (39.68, 68.69)    | 53.61 (39.36, 68.14)    | 74.76 (54.64, 94.99)    |
| <b>Poland</b>                   | 389.13  | 23.8 | 40.53 (29.17, 52.81)    | 104.15 (74.95, 135.72)  | 70.38 (51.26, 90.87)    |
| <b>Portugal</b>                 | 108.00  | 9.5  | 3.85 (2.33, 5.84)       | 35.69 (21.59, 54.08)    | 18.78 (11.47, 28.35)    |

|                                         |         |       |                         |                         |                         |
|-----------------------------------------|---------|-------|-------------------------|-------------------------|-------------------------|
| <b>Puerto Rico</b>                      | 36.84   | 16.7  | 3.73 (2.64, 4.96)       | 101.27 (71.69, 134.66)  | 76.26 (53.86, 101.30)   |
| <b>Qatar</b>                            | 22.21   | 104.2 | 1.46 (1.06, 1.89)       | 65.88 (47.52, 84.97)    | 128.63 (92.66, 166.35)  |
| <b>Romania</b>                          | 195.27  | 19.2  | 15.83 (11.38, 20.56)    | 81.06 (58.28, 105.29)   | 51.90 (37.43, 67.35)    |
| <b>Russia</b>                           | 1481.18 | 15.8  | 170.89 (118.90, 229.76) | 115.38 (80.27, 155.12)  | 82.87 (57.99, 111.67)   |
| <b>Rwanda</b>                           | 116.31  | 41.3  | 8.71 (6.31, 11.23)      | 74.88 (54.22, 96.59)    | 151.70 (109.39, 196.85) |
| <b>Saint Lucia</b>                      | 1.85    | 13.1  | 0.11 (0.07, 0.15)       | 57.56 (39.30, 79.12)    | 57.71 (39.45, 80.03)    |
| <b>Saint Vincent and the Grenadines</b> | 1.10    | 13.2  | 0.06 (0.04, 0.08)       | 54.25 (36.90, 74.94)    | 60.38 (40.98, 83.45)    |
| <b>Samoa</b>                            | 1.94    | 3.7   | 0.00 (0.00, 0.01)       | 0.00 (0.00, 6.72)       | 0.00 (0.00, 10.11)      |
| <b>Sao Tome and Principe</b>            | 1.91    | 12.6  | 0.15 (0.10, 0.21)       | 80.10 (54.07, 111.56)   | 150.88 (101.15, 210.56) |
| <b>Saudi Arabia</b>                     | 314.35  | 102.9 | 30.70 (22.09, 39.58)    | 97.66 (70.26, 125.92)   | 150.52 (109.32, 194.82) |
| <b>Senegal</b>                          | 151.09  | 36.4  | 18.32 (13.34, 23.49)    | 121.23 (88.29, 155.47)  | 232.28 (166.70, 300.78) |
| <b>Serbia</b>                           | 88.56   | 20.8  | 6.93 (4.96, 9.08)       | 78.30 (56.00, 102.53)   | 50.81 (36.59, 66.12)    |
| <b>Seychelles</b>                       | 0.97    | 12.7  | 0.03 (0.02, 0.04)       | 32.68 (22.05, 45.29)    | 34.25 (23.23, 47.29)    |
| <b>Sierra Leone</b>                     | 64.62   | 15    | 5.21 (3.60, 7.02)       | 80.61 (55.73, 108.68)   | 150.18 (103.40, 203.74) |
| <b>Singapore</b>                        | 39.24   | 17.7  | 2.96 (2.09, 3.91)       | 75.44 (53.39, 99.60)    | 60.15 (42.54, 79.62)    |
| <b>Slovakia</b>                         | 55.55   | 20.1  | 4.34 (3.10, 5.65)       | 78.13 (55.88, 101.78)   | 56.44 (40.57, 73.37)    |
| <b>Slovenia</b>                         | 20.63   | 19.9  | 1.58 (1.12, 2.06)       | 76.60 (54.28, 99.90)    | 45.64 (32.80, 59.31)    |
| <b>Solomon Islands</b>                  | 5.86    | 5.2   | 0.03 (0.00, 0.08)       | 4.78 (0.00, 13.86)      | 8.83 (0.00, 25.48)      |
| <b>Somalia</b>                          | 108.49  | 16.7  | 7.39 (5.20, 9.81)       | 68.15 (47.95, 90.38)    | 133.98 (93.74, 179.48)  |
| <b>South Africa</b>                     | 537.24  | 28.9  | 83.45 (60.96, 107.82)   | 155.34 (113.48, 200.68) | 203.05 (146.97, 262.13) |
| <b>South Korea</b>                      | 502.83  | 28.1  | 42.98 (31.24, 55.16)    | 85.48 (62.13, 109.71)   | 62.81 (46.10, 80.28)    |
| <b>South Sudan</b>                      | 122.88  | 28.4  | 10.34 (7.48, 13.34)     | 84.15 (60.87, 108.54)   | 168.75 (121.86, 219.39) |
| <b>Spain</b>                            | 487.51  | 9.6   | 28.19 (17.24, 42.67)    | 57.82 (35.37, 87.52)    | 33.08 (20.25, 49.77)    |
| <b>Sri Lanka</b>                        | 207.48  | 26.4  | 13.44 (9.77, 17.25)     | 64.80 (47.07, 83.15)    | 62.19 (45.41, 79.45)    |
| <b>Sudan</b>                            | 403.89  | 42.3  | 36.09 (26.23, 46.46)    | 89.36 (64.93, 115.04)   | 156.64 (112.55,         |

|                             |         |      |                         |                         |                         |
|-----------------------------|---------|------|-------------------------|-------------------------|-------------------------|
|                             |         |      |                         |                         | 203.44)                 |
| <b>Suriname</b>             | 5.43    | 15.2 | 0.36 (0.25, 0.48)       | 66.06 (46.23, 88.46)    | 77.26 (53.87, 103.80)   |
| <b>Swaziland</b>            | 12.89   | 17.8 | 1.29 (0.90, 1.70)       | 99.81 (70.16, 131.93)   | 186.40 (131.74, 247.70) |
| <b>Sweden</b>               | 98.08   | 6.1  | 1.23 (0.18, 2.60)       | 12.55 (1.88, 26.47)     | 6.94 (1.03, 14.50)      |
| <b>Switzerland</b>          | 82.78   | 12.6 | 6.43 (4.30, 9.01)       | 77.64 (52.00, 108.88)   | 46.31 (30.85, 64.65)    |
| <b>Syria</b>                | 186.22  | 35.8 | 14.88 (10.81, 19.15)    | 79.89 (58.04, 102.85)   | 125.13 (90.21, 162.01)  |
| <b>Tajikistan</b>           | 85.01   | 41.3 | 6.87 (4.95, 8.91)       | 80.82 (58.28, 104.85)   | 145.74 (105.87, 189.20) |
| <b>Tanzania</b>             | 533.73  | 22   | 41.03 (29.90, 52.63)    | 76.87 (56.01, 98.61)    | 155.44 (112.27, 201.32) |
| <b>Thailand</b>             | 678.94  | 25.8 | 62.03 (45.04, 80.16)    | 91.36 (66.34, 118.07)   | 75.85 (55.19, 97.24)    |
| <b>The Bahamas</b>          | 3.87    | 12.6 | 0.20 (0.14, 0.28)       | 52.86 (35.40, 73.21)    | 54.03 (36.14, 75.68)    |
| <b>The Gambia</b>           | 20.01   | 39.7 | 2.00 (1.46, 2.59)       | 100.04 (72.77, 129.46)  | 214.82 (154.65, 277.45) |
| <b>Timor-Leste</b>          | 11.90   | 14.4 | 0.25 (0.18, 0.34)       | 21.32 (14.75, 28.69)    | 34.59 (23.89, 47.05)    |
| <b>Togo</b>                 | 73.03   | 26   | 9.06 (6.57, 11.67)      | 124.04 (89.92, 159.87)  | 227.28 (163.83, 296.75) |
| <b>Tonga</b>                | 1.07    | 3.9  | 0.00 (0.00, 0.01)       | 0.00 (0.00, 7.65)       | 0.00 (0.00, 11.18)      |
| <b>Trinidad and Tobago</b>  | 13.61   | 13.1 | 0.90 (0.61, 1.25)       | 66.18 (45.16, 91.60)    | 60.51 (41.36, 83.84)    |
| <b>Tunisia</b>              | 112.50  | 43.2 | 15.05 (10.93, 19.50)    | 133.82 (97.17, 173.35)  | 138.75 (101.14, 179.30) |
| <b>Turkey</b>               | 784.20  | 35.6 | 149.34 (107.89, 193.37) | 190.43 (137.58, 246.58) | 205.17 (148.13, 266.16) |
| <b>Turkmenistan</b>         | 53.81   | 26.7 | 6.22 (4.49, 8.05)       | 115.65 (83.43, 149.66)  | 173.38 (124.34, 226.28) |
| <b>Uganda</b>               | 391.54  | 57.2 | 26.34 (19.22, 33.74)    | 67.28 (49.09, 86.17)    | 162.19 (117.55, 209.23) |
| <b>Ukraine</b>              | 465.08  | 16.6 | 54.40 (38.42, 73.05)    | 116.97 (82.62, 157.08)  | 78.57 (55.29, 104.13)   |
| <b>United Arab Emirates</b> | 91.45   | 62.2 | 8.16 (5.89, 10.57)      | 89.24 (64.42, 115.58)   | 144.84 (104.05, 188.05) |
| <b>United Kingdom</b>       | 642.44  | 12.2 | 31.84 (21.27, 44.66)    | 49.56 (33.11, 69.52)    | 29.94 (19.98, 42.00)    |
| <b>United States</b>        | 3235.26 | 8.3  | 163.49 (88.76, 262.78)  | 50.53 (27.44, 81.22)    | 35.44 (19.39, 57.44)    |



|                                                                                                   |        |      |                      |                         |                         |
|---------------------------------------------------------------------------------------------------|--------|------|----------------------|-------------------------|-------------------------|
| Uruguay                                                                                           | 34.34  | 11.2 | 1.77 (1.14, 2.56)    | 51.47 (33.33, 74.66)    | 37.80 (24.60, 54.33)    |
| Uzbekistan                                                                                        | 299.41 | 33   | 30.79 (22.37, 39.65) | 102.83 (74.72, 132.42)  | 146.64 (105.09, 191.81) |
| Vanuatu                                                                                           | 2.63   | 6.5  | 0.03 (0.01, 0.05)    | 10.23 (2.99, 19.72)     | 16.78 (4.91, 32.33)     |
| Venezuela                                                                                         | 311.06 | 22.9 | 44.63 (31.94, 58.05) | 143.49 (102.69, 186.63) | 182.63 (131.66, 238.12) |
| Vietnam                                                                                           | 934.72 | 27.3 | 38.83 (28.20, 49.94) | 41.54 (30.17, 53.43)    | 46.79 (33.92, 60.31)    |
| Virgin Islands, U.S.                                                                              | 1.07   | 14.7 | 0.11 (0.07, 0.14)    | 99.44 (68.13, 135.33)   | 63.79 (43.94, 86.41)    |
| Yemen                                                                                             | 269.12 | 40.7 | 22.21 (16.22, 28.54) | 82.52 (60.27, 106.07)   | 166.16 (119.22, 215.67) |
| Zambia                                                                                            | 162.49 | 23.4 | 13.68 (9.94, 17.47)  | 84.19 (61.17, 107.53)   | 183.65 (132.13, 236.56) |
| Zimbabwe                                                                                          | 155.74 | 19.8 | 15.52 (11.18, 20.24) | 99.68 (71.79, 129.93)   | 213.77 (152.75, 280.65) |
| <b>PM<sub>2.5</sub>, Fine particulate matter &lt;2.5 µm; ABD, Attributable burden of disease;</b> |        |      |                      |                         |                         |

1  
2  
3  
4  
5  
6  
7  
8  
9  
10  
11  
12  
13  
14  
15  
16  
17  
18  
19  
20  
21  
22  
23  
24  
25  
26  
27  
28  
29  
30  
31  
32  
33  
34  
35  
36  
37  
38  
39  
40  
41  
42  
43  
44  
45  
46  
47

**Supplemental Table 2:** Years living with disability (YLD), years of life lost (YLL), and disability adjusted life years (DALY) of chronic kidney disease associated with PM<sub>2.5</sub>.

| Country                    | YLD (in 1000s)                   | YLD (per 100,000)       | Age Standardized YLD (per 100,000) | YLL (in 1000s)                    | YLL (per 100,000)          | Age Standardized YLL (per 100,000) | DALY (in 1000s)                    | DALY (per 100,000)         | Age Standardized DALY (per 100,000) |
|----------------------------|----------------------------------|-------------------------|------------------------------------|-----------------------------------|----------------------------|------------------------------------|------------------------------------|----------------------------|-------------------------------------|
| <b>Global</b>              | 2,849.31<br>(1,875.22, 3,983.94) | 38.66<br>(25.44, 54.05) | 40.97 (26.84, 57.11)               | 8,587.74<br>(6,355.78, 10,772.24) | 116.51<br>(86.23, 146.14)  | 122.71 (90.36, 153.52)             | 11,445.40<br>(8,380.25, 14,554.09) | 155.27<br>(113.69, 197.45) | 163.69<br>(120.58, 207.28)          |
| <b>Afghanistan</b>         | 15.78<br>(10.35, 22.35)          | 48.39<br>(31.75, 68.53) | 100.93 (66.66, 141.17)             | 80.86<br>(51.35, 116.20)          | 247.97<br>(157.47, 356.37) | 516.25<br>(326.37, 739.27)         | 96.28<br>(62.90, 135.20)           | 295.27<br>(192.91, 414.63) | 616.34<br>(408.20, 867.27)          |
| <b>Albania</b>             | 0.60 (0.38, 0.88)                | 20.80<br>(13.17, 30.22) | 17.31 (10.99, 24.97)               | 2.11 (1.44, 2.90)                 | 72.97<br>(49.85, 100.23)   | 62.69 (43.29, 85.74)               | 2.72 (1.90, 3.64)                  | 93.81<br>(65.63, 125.67)   | 80.29 (56.13, 106.33)               |
| <b>Algeria</b>             | 22.93<br>(15.02, 32.26)          | 57.86<br>(37.91, 81.39) | 71.02 (46.64, 100.31)              | 47.83<br>(33.27, 63.95)           | 120.68<br>(83.95, 161.35)  | 162.94<br>(114.17, 217.27)         | 71.00<br>(50.72, 92.82)            | 179.14<br>(127.96, 234.19) | 233.92<br>(169.67, 305.79)          |
| <b>American Samoa</b>      | 0.00 (0.00, 0.00)                | 0.00 (0.00, 3.32)       | 0.00 (0.00, 5.20)                  | 0.00 (0.00, 0.02)                 | 0.00 (0.00, 20.43)         | 0.00 (0.00, 33.64)                 | 0.00 (0.00, 0.02)                  | 0.00 (0.00, 23.78)         | 0.00 (0.00, 38.44)                  |
| <b>Andorra</b>             | 0.01 (0.00, 0.01)                | 10.42<br>(5.95, 16.83)  | 6.17 (3.51, 9.97)                  | 0.01 (0.00, 0.02)                 | 11.03<br>(5.28, 19.50)     | 5.94 (2.91, 10.55)                 | 0.02 (0.01, 0.03)                  | 21.70<br>(12.68, 34.27)    | 12.19 (7.19, 19.18)                 |
| <b>Angola</b>              | 6.58 (4.23, 9.46)                | 26.04<br>(16.74, 37.48) | 63.19 (40.50, 90.77)               | 11.30<br>(6.78, 16.55)            | 44.76<br>(26.84, 65.53)    | 87.56 (52.33, 129.83)              | 17.89<br>(12.24, 24.49)            | 70.84<br>(48.47, 96.97)    | 151.41<br>(104.04, 206.44)          |
| <b>Antigua and Barbuda</b> | 0.02 (0.01, 0.03)                | 21.07<br>(12.92, 31.63) | 22.64 (13.72, 34.35)               | 0.09 (0.06, 0.12)                 | 93.37<br>(63.19, 130.16)   | 96.98 (65.92, 135.53)              | 0.11 (0.07, 0.15)                  | 114.57<br>(77.87, 158.29)  | 119.87 (81.10, 165.54)              |
| <b>Argentina</b>           | 10.35<br>(6.52, 15.41)           | 23.84<br>(15.02, 35.50) | 22.48 (14.23, 33.23)               | 30.57<br>(21.14, 41.92)           | 70.43<br>(48.68, 96.56)    | 66.09 (45.14, 89.95)               | 41.06<br>(28.15, 56.10)            | 94.58<br>(64.84, 129.21)   | 88.69 (60.91, 121.56)               |
| <b>Armenia</b>             | 1.92 (1.24, 2.74)                | 63.93<br>(41.29, 91.25) | 54.32 (35.15, 77.48)               | 2.24 (1.63, 2.88)                 | 74.53<br>(54.20, 95.72)    | 63.70 (46.31, 82.02)               | 4.17 (2.99, 5.45)                  | 138.60<br>(99.27, 181.15)  | 118.22 (84.68, 154.97)              |
| <b>Australia</b>           | 0.77 (0.00, 1.83)                | 3.17 (0.00, 7.54)       | 2.32 (0.00, 5.55)                  | 1.51 (0.00, 3.37)                 | 6.20 (0.00, 13.85)         | 4.11 (0.00, 9.20)                  | 2.29 (0.00, 5.11)                  | 9.43 (0.00, 20.99)         | 6.46 (0.00, 14.49)                  |
| <b>Austria</b>             | 2.43 (1.56, 3.30)                | 28.07                   | 16.95 (10.82, 23.08)               | 5.78 (4.12, 7.44)                 | 66.71                      | 35.45 (25.30, 45.60)               | 8.22 (5.88, 10.56)                 | 94.85                      | 52.55 (37.32, 67.78)                |

|                               |                            |                            |                          |                               |                               |                               |                               |                               |                               |
|-------------------------------|----------------------------|----------------------------|--------------------------|-------------------------------|-------------------------------|-------------------------------|-------------------------------|-------------------------------|-------------------------------|
|                               | 3.50)                      | (18.02,<br>40.36)          | 24.67)                   | 7.53)                         | (47.51,<br>86.83)             | 46.46)                        | 10.81)                        | (67.87,<br>124.73)            | 69.02)                        |
| <b>Azerbaijan</b>             | 4.67 (2.99,<br>6.64)       | 47.71<br>(30.59,<br>67.91) | 55.28 (35.35,<br>78.77)  | 10.89<br>(7.49,<br>14.76)     | 111.29<br>(76.59,<br>150.90)  | 118.28 (82.85,<br>158.67)     | 15.58<br>(11.18,<br>20.48)    | 159.25<br>(114.27,<br>209.40) | 173.98<br>(124.03,<br>226.28) |
| <b>Bahrain</b>                | 0.63 (0.40,<br>0.90)       | 46.21<br>(29.50,<br>65.98) | 63.69 (42.15,<br>88.70)  | 1.11 (0.75,<br>1.54)          | 81.34<br>(54.67,<br>112.79)   | 170.51<br>(112.78,<br>236.54) | 1.75 (1.23,<br>2.35)          | 128.14<br>(89.87,<br>171.95)  | 234.56<br>(165.09,<br>315.29) |
| <b>Bangladesh</b>             | 51.45<br>(33.04,<br>72.84) | 31.96<br>(20.53,<br>45.25) | 45.58 (28.89,<br>64.56)  | 168.36<br>(121.18,<br>220.47) | 104.60<br>(75.28,<br>136.98)  | 137.57 (98.14,<br>179.69)     | 220.26<br>(159.56,<br>283.60) | 136.84<br>(99.13,<br>176.20)  | 183.21<br>(132.76,<br>236.87) |
| <b>Barbados</b>               | 0.09 (0.05,<br>0.13)       | 30.39<br>(18.92,<br>44.96) | 22.88 (14.36,<br>33.90)  | 0.33 (0.23,<br>0.44)          | 115.22<br>(79.33,<br>156.08)  | 87.72 (60.74,<br>118.85)      | 0.41 (0.29,<br>0.56)          | 145.83<br>(101.20,<br>197.33) | 110.85 (76.61,<br>149.60)     |
| <b>Belarus</b>                | 3.20 (2.00,<br>4.70)       | 33.32<br>(20.76,<br>48.92) | 24.00 (15.01,<br>35.08)  | 3.21 (2.24,<br>4.31)          | 33.40<br>(23.28,<br>44.86)    | 25.13 (17.48,<br>33.86)       | 6.42 (4.43,<br>8.71)          | 66.78<br>(46.09,<br>90.63)    | 49.26 (34.10,<br>66.80)       |
| <b>Belgium</b>                | 2.59 (1.65,<br>3.76)       | 22.87<br>(14.56,<br>33.19) | 14.18 (9.15,<br>20.36)   | 4.60 (3.24,<br>6.15)          | 40.62<br>(28.56,<br>54.26)    | 21.68 (15.18,<br>28.86)       | 7.22 (5.04,<br>9.69)          | 63.75<br>(44.46,<br>85.52)    | 35.87 (25.02,<br>48.10)       |
| <b>Belize</b>                 | 0.10 (0.07,<br>0.15)       | 29.01<br>(18.88,<br>41.13) | 46.41 (29.68,<br>66.35)  | 0.69 (0.49,<br>0.91)          | 193.45<br>(137.33,<br>254.42) | 309.79<br>(222.58,<br>406.03) | 0.80 (0.57,<br>1.04)          | 222.65<br>(158.81,<br>289.88) | 356.94<br>(258.16,<br>462.43) |
| <b>Benin</b>                  | 4.31 (2.74,<br>6.20)       | 39.46<br>(25.10,<br>56.81) | 81.61 (52.77,<br>115.92) | 11.87<br>(8.18,<br>16.18)     | 108.76<br>(74.96,<br>148.28)  | 172.70<br>(119.54,<br>235.01) | 16.26<br>(11.35,<br>21.77)    | 148.96<br>(103.96,<br>199.48) | 254.04<br>(178.36,<br>337.96) |
| <b>Bermuda</b>                | 0.01 (0.00,<br>0.01)       | 8.40 (4.35,<br>14.40)      | 8.49 (4.43,<br>14.75)    | 0.02 (0.01,<br>0.03)          | 27.68<br>(15.47,<br>44.04)    | 28.16 (15.76,<br>45.10)       | 0.02 (0.01,<br>0.04)          | 36.12<br>(20.32,<br>57.30)    | 36.76 (20.69,<br>57.92)       |
| <b>Bhutan</b>                 | 0.29 (0.18,<br>0.41)       | 36.78<br>(23.66,<br>52.34) | 52.27 (33.89,<br>74.69)  | 0.97 (0.62,<br>1.38)          | 124.89<br>(79.46,<br>178.30)  | 168.36<br>(110.65,<br>236.69) | 1.25 (0.85,<br>1.72)          | 161.48<br>(110.05,<br>221.36) | 220.68<br>(151.58,<br>301.63) |
| <b>Bolivia</b>                | 2.99 (1.94,<br>4.24)       | 27.82<br>(18.01,<br>39.39) | 38.53 (24.81,<br>54.96)  | 22.30<br>(14.92,<br>30.93)    | 207.09<br>(138.57,<br>287.29) | 277.03<br>(182.00,<br>385.54) | 25.39<br>(17.43,<br>34.41)    | 235.85<br>(161.92,<br>319.63) | 316.08<br>(216.87,<br>431.03) |
| <b>Bosnia and Herzegovina</b> | 1.82 (1.19,<br>2.58)       | 47.73<br>(31.24,<br>67.59) | 32.51 (21.31,<br>45.52)  | 3.76 (2.67,<br>5.00)          | 98.66<br>(70.11,<br>131.12)   | 67.09 (47.63,<br>88.75)       | 5.60 (4.02,<br>7.28)          | 146.96<br>(105.54,<br>190.98) | 100.14 (71.90,<br>129.83)     |
| <b>Botswana</b>               | 0.68 (0.43,<br>0.98)       | 29.90<br>(18.95,           | 48.07 (30.04,<br>70.85)  | 1.37 (0.63,<br>2.34)          | 60.71<br>(27.85,              | 102.33 (50.74,<br>168.91)     | 2.06 (1.20,<br>3.16)          | 91.07<br>(52.95,              | 151.38 (90.43,<br>229.77)     |

|                                 |                               |                            |                          |                                   |                              |                               |                                     |                               |                               |
|---------------------------------|-------------------------------|----------------------------|--------------------------|-----------------------------------|------------------------------|-------------------------------|-------------------------------------|-------------------------------|-------------------------------|
|                                 |                               | 43.55)                     |                          |                                   | 103.76)                      |                               |                                     | 140.05)                       |                               |
| <b>Brazil</b>                   | 25.72<br>(15.29,<br>39.59)    | 12.38<br>(7.36,<br>19.05)  | 13.55 (8.11,<br>20.94)   | 98.88<br>(65.54,<br>139.27)       | 47.57<br>(31.53,<br>67.01)   | 51.17 (34.05,<br>72.01)       | 124.85<br>(82.57,<br>176.65)        | 60.07<br>(39.72,<br>84.99)    | 64.76 (42.92,<br>91.88)       |
| <b>Brunei</b>                   | 0.01 (0.00,<br>0.03)          | 2.32 (0.00,<br>8.04)       | 2.98 (0.00,<br>10.53)    | 0.02 (0.00,<br>0.08)              | 5.56 (0.00,<br>19.31)        | 7.87 (0.00,<br>26.63)         | 0.03 (0.00,<br>0.11)                | 8.00 (0.00,<br>26.61)         | 10.86 (0.00,<br>36.48)        |
| <b>Bulgaria</b>                 | 3.47 (2.17,<br>5.03)          | 47.72<br>(29.91,<br>69.20) | 28.59 (18.30,<br>40.81)  | 8.72 (6.17,<br>11.52)             | 119.92<br>(84.89,<br>158.48) | 77.27 (54.61,<br>101.87)      | 12.22<br>(8.79,<br>15.95)           | 168.11<br>(120.88,<br>219.44) | 105.94 (76.14,<br>137.65)     |
| <b>Burkina Faso</b>             | 6.04 (3.81,<br>8.75)          | 33.40<br>(21.06,<br>48.37) | 78.10 (49.95,<br>110.78) | 11.88<br>(8.40,<br>15.80)         | 65.65<br>(46.41,<br>87.30)   | 112.79 (81.92,<br>144.36)     | 17.97<br>(12.84,<br>23.59)          | 99.29<br>(70.95,<br>130.37)   | 190.49<br>(136.55,<br>249.99) |
| <b>Burundi</b>                  | 3.20 (1.98,<br>4.65)          | 28.44<br>(17.61,<br>41.35) | 62.45 (39.54,<br>90.32)  | 5.52 (3.77,<br>7.56)              | 49.05<br>(33.49,<br>67.22)   | 86.58 (59.04,<br>118.33)      | 8.74 (6.21,<br>11.58)               | 77.67<br>(55.23,<br>103.00)   | 149.74<br>(105.20,<br>198.10) |
| <b>Cambodia</b>                 | 2.75 (1.77,<br>3.94)          | 17.66<br>(11.35,<br>25.25) | 27.66 (18.20,<br>39.32)  | 17.78<br>(12.87,<br>22.99)        | 114.06<br>(82.52,<br>147.46) | 166.02<br>(120.34,<br>213.75) | 20.53<br>(14.88,<br>26.32)          | 131.69<br>(95.45,<br>168.79)  | 194.04<br>(141.21,<br>248.37) |
| <b>Cameroon</b>                 | 8.06 (5.11,<br>11.66)         | 34.44<br>(21.84,<br>49.84) | 69.42 (44.47,<br>100.23) | 29.37<br>(17.73,<br>42.92)        | 125.51<br>(75.78,<br>183.42) | 185.46<br>(113.23,<br>271.03) | 37.47<br>(25.06,<br>52.43)          | 160.13<br>(107.09,<br>224.05) | 255.04<br>(167.04,<br>356.67) |
| <b>Canada</b>                   | 2.63 (1.03,<br>5.03)          | 7.27 (2.84,<br>13.91)      | 5.09 (1.98,<br>9.77)     | 3.88 (1.58,<br>6.92)              | 10.73<br>(4.38,<br>19.14)    | 7.01 (2.86,<br>12.42)         | 6.55 (2.66,<br>11.74)               | 18.13<br>(7.35,<br>32.48)     | 12.13 (4.95,<br>21.82)        |
| <b>Cape Verde</b>               | 0.27 (0.18,<br>0.38)          | 52.09<br>(33.73,<br>73.89) | 77.90 (50.53,<br>111.43) | 0.51 (0.36,<br>0.68)              | 97.36<br>(69.06,<br>129.77)  | 132.17 (93.71,<br>175.24)     | 0.78 (0.56,<br>1.02)                | 150.01<br>(107.45,<br>196.66) | 210.82<br>(149.30,<br>276.52) |
| <b>Central African Republic</b> | 1.80 (1.17,<br>2.56)          | 36.68<br>(23.76,<br>52.20) | 68.27 (43.92,<br>97.19)  | 3.93 (2.61,<br>5.41)              | 80.08<br>(53.30,<br>110.29)  | 122.68 (82.91,<br>169.24)     | 5.73 (4.04,<br>7.62)                | 116.92<br>(82.30,<br>155.41)  | 191.79<br>(133.62,<br>256.75) |
| <b>Chad</b>                     | 5.12 (3.23,<br>7.36)          | 36.39<br>(22.95,<br>52.30) | 86.75 (54.15,<br>124.91) | 17.38<br>(12.11,<br>23.42)        | 123.61<br>(86.12,<br>166.54) | 177.23<br>(123.76,<br>236.45) | 22.54<br>(15.88,<br>29.84)          | 160.28<br>(112.95,<br>212.21) | 264.19<br>(189.32,<br>345.78) |
| <b>Chile</b>                    | 8.52 (5.63,<br>11.92)         | 47.46<br>(31.36,<br>66.43) | 41.42 (27.66,<br>57.65)  | 18.06<br>(12.01,<br>25.06)        | 100.60<br>(66.93,<br>139.64) | 87.97 (58.58,<br>122.97)      | 26.54<br>(18.38,<br>35.82)          | 147.86<br>(102.41,<br>199.56) | 129.54 (90.05,<br>175.32)     |
| <b>China</b>                    | 462.21<br>(304.57,<br>647.27) | 33.41<br>(22.01,<br>46.79) | 29.12 (19.36,<br>41.01)  | 1,188.22<br>(870.96,<br>1,501.83) | 85.89<br>(62.95,<br>108.56)  | 76.18 (55.93,<br>96.49)       | 1,651.72<br>(1,212.35,<br>2,103.21) | 119.39<br>(87.63,<br>152.02)  | 105.79 (77.30,<br>133.98)     |

|                                         |                            |                            |                          |                            |                              |                               |                            |                               |                               |
|-----------------------------------------|----------------------------|----------------------------|--------------------------|----------------------------|------------------------------|-------------------------------|----------------------------|-------------------------------|-------------------------------|
| <b>Colombia</b>                         | 14.77<br>(9.60,<br>20.92)  | 30.61<br>(19.89,<br>43.34) | 34.79 (22.95,<br>49.73)  | 37.69<br>(26.69,<br>49.38) | 78.08<br>(55.30,<br>102.32)  | 92.36 (65.62,<br>121.19)      | 52.45<br>(37.36,<br>68.94) | 108.66<br>(77.41,<br>142.84)  | 127.67 (90.79,<br>167.02)     |
| <b>Comoros</b>                          | 0.20 (0.12,<br>0.30)       | 25.43<br>(15.55,<br>37.83) | 48.98 (29.85,<br>73.12)  | 0.25 (0.13,<br>0.39)       | 31.35<br>(17.02,<br>49.22)   | 53.86 (29.18,<br>84.89)       | 0.45 (0.29,<br>0.65)       | 56.76<br>(36.33,<br>81.83)    | 103.08 (66.46,<br>149.18)     |
| <b>Congo</b>                            | 1.55 (0.99,<br>2.20)       | 33.48<br>(21.39,<br>47.46) | 64.04 (41.27,<br>91.07)  | 2.68 (1.76,<br>3.74)       | 57.90<br>(37.97,<br>80.80)   | 100.69 (65.77,<br>141.75)     | 4.24 (2.96,<br>5.74)       | 91.63<br>(64.03,<br>124.09)   | 165.95<br>(114.47,<br>222.62) |
| <b>Costa Rica</b>                       | 1.89 (1.22,<br>2.73)       | 39.40<br>(25.33,<br>56.70) | 39.80 (25.50,<br>56.91)  | 6.49 (4.71,<br>8.39)       | 135.03<br>(98.02,<br>174.38) | 134.89 (97.43,<br>173.03)     | 8.41 (6.10,<br>10.78)      | 174.83<br>(126.80,<br>224.09) | 174.96<br>(126.88,<br>224.74) |
| <b>Cote d'Ivoire</b>                    | 9.08 (5.68,<br>13.15)      | 40.03<br>(25.06,<br>57.97) | 80.94 (51.84,<br>116.88) | 28.27<br>(19.14,<br>39.04) | 124.62<br>(84.34,<br>172.07) | 189.00<br>(123.69,<br>267.47) | 37.33<br>(25.50,<br>50.49) | 164.53<br>(112.41,<br>222.56) | 270.82<br>(185.31,<br>369.24) |
| <b>Croatia</b>                          | 1.65 (1.08,<br>2.34)       | 38.87<br>(25.48,<br>55.06) | 23.65 (15.44,<br>33.25)  | 3.34 (2.40,<br>4.33)       | 78.73<br>(56.70,<br>102.04)  | 45.03 (32.47,<br>58.44)       | 5.00 (3.62,<br>6.45)       | 117.81<br>(85.44,<br>152.10)  | 69.03 (49.85,<br>88.95)       |
| <b>Cuba</b>                             | 3.17 (1.99,<br>4.63)       | 27.81<br>(17.47,<br>40.61) | 20.49 (12.69,<br>30.35)  | 10.25<br>(7.29,<br>13.57)  | 89.95<br>(64.00,<br>119.09)  | 66.97 (47.68,<br>88.27)       | 13.45<br>(9.50,<br>17.70)  | 118.07<br>(83.42,<br>155.38)  | 87.58 (62.19,<br>115.61)      |
| <b>Cyprus</b>                           | 0.21 (0.14,<br>0.31)       | 23.91<br>(15.14,<br>34.44) | 18.20 (11.76,<br>25.83)  | 0.75 (0.54,<br>0.97)       | 83.82<br>(60.07,<br>109.09)  | 60.21 (43.24,<br>78.34)       | 0.96 (0.69,<br>1.25)       | 107.87<br>(77.36,<br>140.64)  | 78.41 (56.11,<br>102.22)      |
| <b>Czech Republic</b>                   | 4.25 (2.78,<br>6.04)       | 39.71<br>(25.97,<br>56.42) | 25.71 (16.53,<br>36.59)  | 5.56 (4.07,<br>7.07)       | 51.94<br>(38.09,<br>66.06)   | 32.97 (23.97,<br>41.68)       | 9.83 (7.04,<br>12.77)      | 91.86<br>(65.78,<br>119.39)   | 58.62 (42.45,<br>76.24)       |
| <b>Democratic Republic of the Congo</b> | 22.52<br>(14.70,<br>32.09) | 29.09<br>(18.99,<br>41.45) | 65.38 (42.42,<br>93.03)  | 33.70<br>(24.05,<br>44.53) | 43.53<br>(31.07,<br>57.52)   | 78.20 (56.21,<br>102.14)      | 56.66<br>(40.43,<br>73.73) | 73.19<br>(52.22,<br>95.24)    | 143.94<br>(103.26,<br>188.29) |
| <b>Denmark</b>                          | 0.77 (0.46,<br>1.20)       | 13.52<br>(8.13,<br>21.05)  | 8.77 (5.30,<br>13.74)    | 1.38 (0.88,<br>2.00)       | 24.11<br>(15.44,<br>35.11)   | 14.49 (9.35,<br>21.05)        | 2.15 (1.39,<br>3.13)       | 37.71<br>(24.36,<br>54.78)    | 23.27 (15.13,<br>33.81)       |
| <b>Djibouti</b>                         | 0.35 (0.22,<br>0.51)       | 39.75<br>(24.97,<br>57.53) | 69.42 (43.27,<br>101.69) | 0.52 (0.33,<br>0.74)       | 58.06<br>(36.69,<br>83.43)   | 89.00 (55.89,<br>128.33)      | 0.87 (0.60,<br>1.19)       | 98.28<br>(67.04,<br>134.22)   | 159.20<br>(108.66,<br>216.60) |
| <b>Dominica</b>                         | 0.02 (0.01,<br>0.03)       | 26.78<br>(16.28,<br>40.41) | 27.20 (16.63,<br>41.41)  | 0.10 (0.07,<br>0.14)       | 141.01<br>(94.20,<br>198.43) | 143.39 (95.78,<br>200.98)     | 0.12 (0.08,<br>0.17)       | 167.77<br>(112.89,<br>233.81) | 170.57<br>(114.74,<br>238.15) |

|                                       |                      |                      |                       |                        |                         |                         |                         |                         |                         |
|---------------------------------------|----------------------|----------------------|-----------------------|------------------------|-------------------------|-------------------------|-------------------------|-------------------------|-------------------------|
| <b>Dominican Republic</b>             | 2.16 (1.40, 3.11)    | 20.51 (13.32, 29.56) | 25.21 (16.27, 35.79)  | 10.27 (7.12, 13.78)    | 97.53 (67.59, 130.86)   | 118.26 (82.48, 158.03)  | 12.44 (8.72, 16.50)     | 118.16 (82.83, 156.69)  | 143.44 (101.14, 190.86) |
| <b>Ecuador</b>                        | 2.15 (1.32, 3.26)    | 13.29 (8.20, 20.16)  | 16.47 (10.07, 24.94)  | 16.18 (11.08, 22.31)   | 100.15 (68.60, 138.10)  | 125.41 (85.32, 172.37)  | 18.39 (12.51, 25.26)    | 113.87 (77.43, 156.40)  | 142.20 (96.35, 195.11)  |
| <b>Egypt</b>                          | 52.26 (33.82, 73.90) | 57.34 (37.10, 81.08) | 78.38 (52.19, 109.64) | 120.03 (72.90, 175.32) | 131.68 (79.98, 192.35)  | 195.21 (113.70, 292.81) | 172.30 (117.78, 234.75) | 189.03 (129.21, 257.55) | 273.55 (184.84, 379.35) |
| <b>El Salvador</b>                    | 3.28 (2.17, 4.57)    | 53.49 (35.35, 74.39) | 60.54 (40.91, 83.89)  | 26.18 (18.78, 34.28)   | 426.58 (306.06, 558.61) | 481.81 (344.35, 636.50) | 29.52 (21.20, 38.63)    | 481.04 (345.36, 629.37) | 543.35 (391.16, 707.96) |
| <b>Equatorial Guinea</b>              | 0.31 (0.19, 0.44)    | 36.10 (22.80, 52.06) | 62.82 (40.97, 89.68)  | 0.33 (0.14, 0.55)      | 38.67 (16.27, 65.19)    | 65.43 (28.59, 107.37)   | 0.63 (0.40, 0.91)       | 74.72 (47.43, 107.66)   | 127.91 (82.09, 182.20)  |
| <b>Eritrea</b>                        | 1.58 (0.99, 2.26)    | 30.15 (18.84, 43.18) | 65.72 (41.77, 93.78)  | 2.55 (1.72, 3.51)      | 48.56 (32.81, 67.03)    | 90.41 (61.56, 124.00)   | 4.13 (2.84, 5.58)       | 78.70 (54.27, 106.42)   | 156.58 (109.12, 209.90) |
| <b>Estonia</b>                        | 0.24 (0.13, 0.40)    | 17.52 (9.40, 29.47)  | 10.53 (5.71, 17.73)   | 0.34 (0.20, 0.52)      | 24.98 (14.95, 38.24)    | 15.18 (9.06, 23.36)     | 0.58 (0.34, 0.90)       | 42.69 (25.13, 66.20)    | 25.83 (15.22, 40.11)    |
| <b>Ethiopia</b>                       | 33.19 (20.80, 48.02) | 33.38 (20.92, 48.29) | 67.59 (42.14, 98.96)  | 61.22 (42.68, 81.87)   | 61.57 (42.92, 82.34)    | 109.74 (76.89, 145.84)  | 94.59 (67.19, 125.41)   | 95.13 (67.58, 126.13)   | 177.87 (126.42, 234.11) |
| <b>Federated States of Micronesia</b> | 0.01 (0.00, 0.01)    | 5.15 (0.78, 11.55)   | 8.30 (1.23, 18.33)    | 0.05 (0.01, 0.11)      | 46.55 (6.82, 106.75)    | 71.82 (10.73, 165.71)   | 0.05 (0.01, 0.12)       | 51.60 (7.54, 116.80)    | 80.06 (12.05, 181.25)   |
| <b>Fiji</b>                           | 0.06 (0.01, 0.14)    | 7.08 (0.72, 16.13)   | 8.44 (0.86, 19.52)    | 0.49 (0.05, 1.10)      | 54.64 (5.58, 123.55)    | 65.44 (6.46, 147.66)    | 0.55 (0.06, 1.23)       | 61.67 (6.29, 138.03)    | 74.23 (7.50, 164.95)    |
| <b>Finland</b>                        | 0.31 (0.13, 0.58)    | 5.53 (2.29, 10.37)   | 3.37 (1.42, 6.32)     | 0.34 (0.15, 0.59)      | 6.04 (2.65, 10.58)      | 3.25 (1.44, 5.68)       | 0.64 (0.28, 1.14)       | 11.62 (5.04, 20.51)     | 6.67 (2.90, 11.83)      |
| <b>France</b>                         | 10.91 (6.80, 16.24)  | 16.72 (10.42, 24.90) | 10.33 (6.46, 15.54)   | 14.82 (9.99, 20.53)    | 22.72 (15.32, 31.47)    | 11.56 (7.81, 16.04)     | 25.74 (17.27, 36.09)    | 39.46 (26.48, 55.32)    | 21.98 (14.45, 30.75)    |
| <b>Gabon</b>                          | 0.69 (0.44, 0.98)    | 39.84 (25.74, 56.59) | 64.43 (41.20, 92.46)  | 1.17 (0.73, 1.69)      | 67.89 (42.35, 97.63)    | 103.47 (65.94, 149.30)  | 1.86 (1.28, 2.56)       | 107.89 (74.10, 148.39)  | 169.15 (115.23, 230.82) |



|                      |                      |                      |                       |                      |                         |                         |                      |                         |                         |
|----------------------|----------------------|----------------------|-----------------------|----------------------|-------------------------|-------------------------|----------------------|-------------------------|-------------------------|
| <b>Georgia</b>       | 2.79 (1.81, 3.99)    | 69.57 (45.09, 99.58) | 52.95 (34.74, 74.84)  | 5.47 (3.95, 7.07)    | 136.67 (98.53, 176.53)  | 109.34 (78.72, 141.78)  | 8.05 (5.80, 10.42)   | 200.95 (144.82, 260.11) | 162.56 (116.39, 211.01) |
| <b>Germany</b>       | 19.37 (12.08, 28.60) | 23.16 (14.45, 34.20) | 12.69 (7.91, 18.77)   | 48.60 (33.67, 65.68) | 58.12 (40.26, 78.54)    | 26.78 (18.63, 36.11)    | 68.11 (47.23, 92.79) | 81.44 (56.48, 110.96)   | 39.52 (27.20, 53.71)    |
| <b>Ghana</b>         | 12.42 (7.83, 17.85)  | 45.30 (28.55, 65.10) | 82.09 (52.28, 118.31) | 26.03 (18.42, 34.67) | 94.94 (67.17, 126.47)   | 138.80 (98.95, 184.52)  | 38.46 (27.42, 50.42) | 140.27 (100.00, 183.89) | 221.70 (158.31, 291.92) |
| <b>Greece</b>        | 2.82 (1.77, 4.15)    | 25.80 (16.19, 37.97) | 14.22 (8.94, 21.00)   | 6.41 (4.38, 8.70)    | 58.68 (40.11, 79.65)    | 28.23 (19.35, 38.55)    | 9.20 (6.34, 12.62)   | 84.26 (58.03, 115.54)   | 42.42 (29.20, 58.30)    |
| <b>Greenland</b>     | 0.00 (0.00, 0.00)    | 1.91 (0.00, 5.81)    | 2.03 (0.00, 6.25)     | 0.00 (0.00, 0.01)    | 3.06 (0.00, 9.34)       | 4.06 (0.00, 12.10)      | 0.00 (0.00, 0.01)    | 5.05 (0.00, 14.85)      | 6.15 (0.00, 17.97)      |
| <b>Grenada</b>       | 0.02 (0.02, 0.04)    | 23.18 (14.68, 34.33) | 26.83 (16.93, 39.22)  | 0.17 (0.12, 0.24)    | 160.25 (109.88, 220.44) | 185.70 (127.42, 254.62) | 0.20 (0.13, 0.27)    | 183.38 (126.10, 251.11) | 212.35 (146.51, 290.28) |
| <b>Guam</b>          | 0.01 (0.01, 0.03)    | 8.49 (3.03, 16.96)   | 8.90 (3.15, 17.49)    | 0.07 (0.02, 0.13)    | 40.18 (14.62, 75.40)    | 41.50 (15.03, 77.79)    | 0.08 (0.03, 0.15)    | 48.82 (18.00, 91.23)    | 50.69 (18.52, 93.78)    |
| <b>Guatemala</b>     | 6.58 (4.31, 9.27)    | 40.24 (26.36, 56.66) | 65.22 (42.57, 91.99)  | 36.15 (24.35, 49.98) | 221.02 (148.91, 305.60) | 341.33 (229.36, 470.47) | 42.67 (29.49, 58.10) | 260.90 (180.34, 355.27) | 408.41 (283.82, 551.84) |
| <b>Guinea</b>        | 4.63 (2.95, 6.69)    | 36.83 (23.43, 53.19) | 73.16 (46.42, 106.87) | 10.60 (7.03, 14.77)  | 84.34 (55.88, 117.44)   | 125.93 (84.04, 177.29)  | 15.23 (10.57, 20.72) | 121.16 (84.06, 164.80)  | 200.40 (138.47, 270.56) |
| <b>Guinea-Bissau</b> | 0.95 (0.60, 1.37)    | 51.12 (32.31, 73.94) | 97.52 (61.55, 140.52) | 3.07 (2.11, 4.18)    | 166.22 (114.18, 226.05) | 250.33 (172.32, 341.15) | 4.02 (2.82, 5.40)    | 217.69 (152.81, 291.96) | 349.02 (246.22, 463.93) |
| <b>Guyana</b>        | 0.16 (0.10, 0.23)    | 20.60 (12.92, 30.36) | 27.16 (17.08, 40.05)  | 1.07 (0.74, 1.45)    | 138.67 (96.10, 188.24)  | 166.74 (115.79, 224.82) | 1.23 (0.85, 1.66)    | 159.32 (110.51, 215.69) | 193.49 (134.96, 260.32) |
| <b>Haiti</b>         | 3.11 (1.99, 4.46)    | 28.98 (18.58, 41.56) | 46.35 (30.15, 65.93)  | 21.89 (13.72, 31.56) | 204.22 (127.98, 294.35) | 288.82 (178.97, 421.19) | 24.97 (16.35, 35.18) | 232.93 (152.48, 328.10) | 336.51 (221.79, 469.96) |
| <b>Honduras</b>      | 2.91 (1.87, 4.16)    | 35.95 (23.14, 51.41) | 56.82 (36.73, 80.36)  | 18.89 (11.77, 27.36) | 233.27 (145.37, 337.87) | 373.02 (236.17, 536.20) | 21.84 (14.16, 30.66) | 269.69 (174.88, 378.64) | 429.86 (279.86, 607.50) |
| <b>Hungary</b>       | 4.43 (2.93, 6.25)    | 43.61 (28.86, 58.36) | 27.78 (18.37, 39.22)  | 7.31 (5.32, 9.32)    | 71.89 (52.35, 81.43)    | 45.39 (33.18, 57.91)    | 11.77 (8.60, 14.94)  | 115.74 (84.56, 146.92)  | 73.26 (53.08, 94.52)    |



|                   |                               |                            |                           |                                     |                               |                               |                                     |                               |                               |
|-------------------|-------------------------------|----------------------------|---------------------------|-------------------------------------|-------------------------------|-------------------------------|-------------------------------------|-------------------------------|-------------------------------|
|                   |                               | 61.47)                     |                           |                                     | 91.69)                        |                               | 15.16)                              | 149.08)                       |                               |
| <b>Iceland</b>    | 0.01 (0.01,<br>0.03)          | 4.32 (1.96,<br>7.91)       | 3.32 (1.51,<br>6.12)      | 0.02 (0.01,<br>0.04)                | 6.61 (3.15,<br>11.26)         | 4.67 (2.24,<br>7.93)          | 0.04 (0.02,<br>0.06)                | 10.97<br>(5.24,<br>18.70)     | 8.05 (3.82,<br>13.68)         |
| <b>India</b>      | 447.47<br>(289.00,<br>638.28) | 34.12<br>(22.03,<br>48.66) | 45.40 (29.19,<br>64.54)   | 2,048.91<br>(1,471.02,<br>2,662.61) | 156.21<br>(112.15,<br>203.00) | 192.55<br>(138.73,<br>249.04) | 2,502.15<br>(1,827.96,<br>3,204.77) | 190.77<br>(139.37,<br>244.33) | 238.25<br>(173.90,<br>303.98) |
| <b>Indonesia</b>  | 40.67<br>(25.55,<br>60.13)    | 15.79<br>(9.92,<br>23.34)  | 20.02 (12.80,<br>29.32)   | 224.57<br>(158.94,<br>297.66)       | 87.17<br>(61.70,<br>115.54)   | 102.00 (72.07,<br>134.72)     | 265.23<br>(186.14,<br>351.41)       | 102.95<br>(72.25,<br>136.41)  | 122.19 (86.18,<br>162.36)     |
| <b>Iran</b>       | 40.01<br>(25.81,<br>56.48)    | 50.63<br>(32.66,<br>71.46) | 62.59 (40.71,<br>87.54)   | 63.94<br>(43.65,<br>87.16)          | 80.90<br>(55.23,<br>110.28)   | 113.67 (76.61,<br>156.53)     | 104.22<br>(74.20,<br>137.48)        | 131.87<br>(93.88,<br>173.95)  | 176.65<br>(125.09,<br>232.59) |
| <b>Iraq</b>       | 19.19<br>(12.49,<br>27.20)    | 52.68<br>(34.30,<br>74.68) | 101.57 (65.61,<br>143.07) | 55.87<br>(36.12,<br>78.88)          | 153.40<br>(99.19,<br>216.58)  | 318.22<br>(206.59,<br>449.32) | 75.32<br>(50.89,<br>102.71)         | 206.79<br>(139.73,<br>282.01) | 419.84<br>(287.98,<br>568.47) |
| <b>Ireland</b>    | 0.37 (0.21,<br>0.61)          | 7.79 (4.40,<br>12.69)      | 6.15 (3.49,<br>9.94)      | 0.75 (0.46,<br>1.15)                | 15.76<br>(9.63,<br>23.98)     | 12.00 (7.32,<br>18.19)        | 1.13 (0.70,<br>1.71)                | 23.65<br>(14.54,<br>35.63)    | 18.27 (11.28,<br>27.51)       |
| <b>Israel</b>     | 3.02 (2.00,<br>4.21)          | 37.57<br>(24.79,<br>52.28) | 34.58 (23.29,<br>48.51)   | 8.19 (5.64,<br>11.06)               | 101.74<br>(70.06,<br>137.39)  | 89.16 (61.66,<br>120.39)      | 11.22<br>(8.06,<br>14.81)           | 139.36<br>(100.15,<br>184.04) | 124.05 (88.27,<br>162.83)     |
| <b>Italy</b>      | 21.45<br>(13.88,<br>30.20)    | 34.16<br>(22.11,<br>48.10) | 18.21 (11.64,<br>25.94)   | 42.15<br>(30.49,<br>53.95)          | 67.12<br>(48.55,<br>85.91)    | 30.11 (21.70,<br>38.73)       | 63.56<br>(45.86,<br>82.14)          | 101.22<br>(73.03,<br>130.80)  | 48.45 (34.67,<br>63.06)       |
| <b>Jamaica</b>    | 0.85 (0.55,<br>1.24)          | 30.16<br>(19.31,<br>43.66) | 31.36 (20.01,<br>45.53)   | 4.10 (2.52,<br>5.95)                | 145.06<br>(88.93,<br>210.37)  | 150.41 (95.03,<br>220.47)     | 4.93 (3.20,<br>7.06)                | 174.26<br>(113.09,<br>249.40) | 182.02<br>(119.19,<br>259.29) |
| <b>Japan</b>      | 57.64<br>(36.80,<br>84.54)    | 44.92<br>(28.68,<br>65.89) | 21.97 (13.83,<br>32.50)   | 72.08<br>(49.89,<br>97.36)          | 56.18<br>(38.88,<br>75.88)    | 23.15 (16.00,<br>31.22)       | 129.79<br>(88.75,<br>178.70)        | 101.16<br>(69.17,<br>139.27)  | 45.26 (30.63,<br>62.55)       |
| <b>Jordan</b>     | 3.38 (2.20,<br>4.78)          | 44.69<br>(29.00,<br>63.16) | 73.69 (48.26,<br>104.12)  | 8.94 (5.84,<br>12.69)               | 118.07<br>(77.08,<br>167.59)  | 220.75<br>(145.55,<br>309.46) | 12.38<br>(8.47,<br>16.92)           | 163.52<br>(111.86,<br>223.54) | 295.39<br>(203.17,<br>401.39) |
| <b>Kazakhstan</b> | 6.56 (4.09,<br>9.54)          | 37.39<br>(23.33,<br>54.40) | 44.28 (27.96,<br>64.54)   | 10.80<br>(7.42,<br>14.68)           | 61.60<br>(42.29,<br>83.70)    | 67.01 (45.73,<br>91.21)       | 17.40<br>(12.14,<br>23.45)          | 99.23<br>(69.24,<br>133.73)   | 111.27 (77.35,<br>149.82)     |
| <b>Kenya</b>      | 7.21 (4.44,<br>10.72)         | 15.62<br>(9.60,            | 32.62 (19.87,<br>48.33)   | 9.03 (6.02,<br>12.76)               | 19.55<br>(13.04,              | 35.26 (23.26,<br>49.71)       | 16.31<br>(11.14,                    | 35.32<br>(24.13,              | 67.96 (46.37,<br>94.51)       |

|                   |                   |                      |                       |                     |                         |                         |                     |                         |                         |
|-------------------|-------------------|----------------------|-----------------------|---------------------|-------------------------|-------------------------|---------------------|-------------------------|-------------------------|
|                   |                   | 23.20)               |                       |                     | 27.62)                  |                         | 22.40)              | 48.50)                  |                         |
| <b>Kiribati</b>   | 0.00 (0.00, 0.00) | 0.00 (0.00, 2.78)    | 0.00 (0.00, 4.34)     | 0.00 (0.00, 0.02)   | 0.00 (0.00, 14.97)      | 0.00 (0.00, 22.50)      | 0.00 (0.00, 0.02)   | 0.00 (0.00, 17.59)      | 0.00 (0.00, 26.59)      |
| <b>Kuwait</b>     | 1.67 (1.07, 2.36) | 42.72 (27.46, 60.56) | 62.14 (41.51, 87.34)  | 1.46 (0.94, 2.04)   | 37.47 (24.17, 52.38)    | 96.18 (63.34, 135.21)   | 3.13 (2.18, 4.19)   | 80.12 (56.00, 107.52)   | 158.85 (110.11, 212.88) |
| <b>Kyrgyzstan</b> | 1.60 (0.99, 2.32) | 27.19 (16.87, 39.37) | 39.54 (25.16, 57.71)  | 3.97 (2.80, 5.24)   | 67.28 (47.48, 88.89)    | 77.55 (54.77, 102.49)   | 5.58 (3.92, 7.39)   | 94.65 (66.52, 125.35)   | 117.48 (82.40, 157.14)  |
| <b>Laos</b>       | 1.40 (0.92, 1.96) | 20.54 (13.47, 28.90) | 35.90 (23.64, 50.12)  | 10.56 (7.48, 13.97) | 155.35 (109.96, 205.51) | 225.76 (160.53, 295.45) | 11.98 (8.56, 15.65) | 176.24 (125.92, 230.19) | 261.99 (187.73, 338.96) |
| <b>Latvia</b>     | 1.15 (0.72, 1.66) | 51.94 (32.47, 75.02) | 31.18 (19.79, 44.95)  | 1.23 (0.88, 1.59)   | 55.51 (39.91, 71.89)    | 35.81 (25.58, 46.79)    | 2.38 (1.68, 3.14)   | 107.46 (75.80, 141.87)  | 66.97 (47.80, 88.16)    |
| <b>Lebanon</b>    | 2.84 (1.86, 4.04) | 49.32 (32.23, 70.05) | 52.61 (33.79, 73.67)  | 3.16 (2.20, 4.23)   | 54.82 (38.26, 73.35)    | 60.14 (42.42, 81.00)    | 6.03 (4.33, 7.85)   | 104.63 (75.20, 136.31)  | 113.49 (80.31, 149.05)  |
| <b>Lesotho</b>    | 0.89 (0.57, 1.28) | 41.72 (26.56, 60.28) | 73.49 (46.75, 106.00) | 2.27 (1.40, 3.30)   | 106.69 (65.92, 154.98)  | 191.47 (120.26, 275.94) | 3.17 (2.11, 4.41)   | 148.80 (99.07, 207.33)  | 265.75 (177.38, 369.94) |
| <b>Liberia</b>    | 0.37 (0.16, 0.69) | 8.13 (3.55, 15.26)   | 16.17 (7.14, 30.27)   | 1.02 (0.46, 1.85)   | 22.67 (10.20, 41.02)    | 37.89 (17.07, 68.49)    | 1.40 (0.63, 2.46)   | 31.11 (14.03, 54.65)    | 54.40 (24.99, 95.66)    |
| <b>Libya</b>      | 3.10 (1.99, 4.41) | 49.22 (31.58, 70.12) | 64.63 (41.62, 91.46)  | 9.93 (6.69, 13.58)  | 157.79 (106.21, 215.77) | 239.23 (164.52, 324.97) | 12.98 (9.12, 17.43) | 206.27 (144.95, 276.96) | 304.55 (214.36, 405.38) |
| <b>Lithuania</b>  | 1.40 (0.87, 2.03) | 44.29 (27.62, 64.53) | 26.66 (16.65, 38.80)  | 1.23 (0.89, 1.59)   | 38.87 (28.18, 50.34)    | 25.74 (18.60, 33.17)    | 2.63 (1.83, 3.53)   | 83.36 (57.97, 112.11)   | 52.62 (36.84, 69.86)    |
| <b>Luxembourg</b> | 0.11 (0.07, 0.16) | 20.08 (13.06, 28.98) | 14.63 (9.45, 21.29)   | 0.20 (0.14, 0.27)   | 35.99 (25.41, 48.02)    | 24.27 (17.12, 32.21)    | 0.31 (0.22, 0.42)   | 56.31 (39.71, 74.94)    | 38.94 (27.24, 52.34)    |
| <b>Macedonia</b>  | 0.90 (0.59, 1.27) | 43.25 (28.18, 61.19) | 34.63 (22.59, 48.79)  | 2.21 (1.61, 2.83)   | 106.56 (77.58, 136.06)  | 84.44 (61.71, 107.85)   | 3.12 (2.28, 3.98)   | 150.29 (109.65, 191.33) | 119.39 (86.76, 152.31)  |
| <b>Madagascar</b> | 5.26 (3.22, 7.69) | 21.73 (13.31, 31.80) | 45.18 (28.06, 66.20)  | 9.04 (5.99, 12.78)  | 37.37 (24.77, 52.83)    | 61.22 (40.58, 85.75)    | 14.36 (9.80, 19.61) | 59.35 (40.52, 81.07)    | 107.07 (74.22, 146.41)  |

|                         |                       |                      |                       |                         |                         |                         |                         |                         |                         |
|-------------------------|-----------------------|----------------------|-----------------------|-------------------------|-------------------------|-------------------------|-------------------------|-------------------------|-------------------------|
| <b>Malawi</b>           | 4.24 (2.62, 6.18)     | 24.65 (15.22, 35.88) | 56.22 (35.02, 82.60)  | 8.68 (5.88, 11.99)      | 50.42 (34.18, 69.66)    | 89.53 (60.33, 124.01)   | 12.99 (9.07, 17.38)     | 75.45 (52.71, 100.96)   | 146.34 (103.79, 194.95) |
| <b>Malaysia</b>         | 4.83 (2.98, 7.15)     | 15.95 (9.83, 23.60)  | 19.95 (12.31, 29.58)  | 17.65 (12.24, 23.82)    | 58.25 (40.41, 78.62)    | 75.22 (52.62, 100.56)   | 22.52 (15.61, 30.24)    | 74.33 (51.53, 99.81)    | 95.26 (66.73, 127.57)   |
| <b>Maldives</b>         | 0.08 (0.05, 0.12)     | 22.29 (14.33, 31.90) | 31.65 (20.35, 44.89)  | 0.49 (0.33, 0.67)       | 134.44 (90.97, 184.83)  | 206.14 (139.42, 282.81) | 0.57 (0.39, 0.77)       | 156.71 (107.58, 212.79) | 237.75 (164.88, 321.79) |
| <b>Mali</b>             | 6.34 (3.98, 9.08)     | 36.09 (22.66, 51.68) | 84.40 (54.25, 121.34) | 16.34 (10.69, 22.99)    | 93.03 (60.87, 130.87)   | 140.33 (92.29, 195.80)  | 22.81 (15.96, 30.76)    | 129.83 (90.82, 175.11)  | 225.22 (157.45, 301.52) |
| <b>Malta</b>            | 0.10 (0.06, 0.15)     | 24.57 (15.50, 35.79) | 15.83 (10.05, 23.22)  | 0.23 (0.16, 0.32)       | 56.10 (37.89, 77.44)    | 33.99 (23.02, 47.21)    | 0.34 (0.23, 0.46)       | 80.76 (55.48, 109.36)   | 49.99 (34.54, 68.39)    |
| <b>Marshall Islands</b> | 0.01 (0.01, 0.02)     | 16.60 (9.08, 27.35)  | 27.62 (15.35, 45.56)  | 0.08 (0.04, 0.14)       | 107.66 (53.64, 189.61)  | 171.05 (85.99, 298.82)  | 0.09 (0.05, 0.15)       | 124.80 (65.47, 213.03)  | 199.34 (104.19, 344.92) |
| <b>Mauritania</b>       | 1.84 (1.14, 2.66)     | 44.98 (27.94, 65.03) | 81.72 (51.93, 116.30) | 3.45 (2.23, 4.89)       | 84.49 (54.54, 119.68)   | 133.29 (87.40, 189.66)  | 5.32 (3.67, 7.21)       | 130.13 (89.96, 176.52)  | 216.06 (149.79, 291.21) |
| <b>Mauritius</b>        | 0.53 (0.33, 0.77)     | 41.27 (26.17, 60.30) | 37.45 (23.50, 54.65)  | 4.03 (2.77, 5.54)       | 316.19 (217.45, 434.77) | 278.43 (190.83, 382.07) | 4.57 (3.14, 6.26)       | 358.69 (246.54, 491.69) | 315.62 (217.48, 432.92) |
| <b>Mexico</b>           | 74.93 (49.49, 104.85) | 58.98 (38.95, 82.54) | 72.27 (48.02, 101.20) | 390.95 (286.18, 495.17) | 307.73 (225.26, 389.77) | 382.48 (279.40, 484.08) | 466.91 (339.46, 591.64) | 367.53 (267.20, 465.70) | 455.29 (332.51, 577.97) |
| <b>Moldova</b>          | 1.10 (0.69, 1.65)     | 27.07 (16.89, 40.47) | 23.99 (14.92, 35.33)  | 1.24 (0.87, 1.65)       | 30.56 (21.50, 40.70)    | 25.99 (18.17, 34.39)    | 2.35 (1.63, 3.18)       | 57.86 (40.20, 78.24)    | 49.92 (34.26, 68.11)    |
| <b>Mongolia</b>         | 1.44 (0.91, 2.07)     | 48.65 (30.89, 70.07) | 71.95 (45.44, 104.52) | 3.92 (1.84, 6.39)       | 132.82 (62.15, 216.42)  | 159.95 (82.07, 251.45)  | 5.36 (3.07, 8.10)       | 181.34 (104.12, 274.36) | 232.09 (144.46, 338.98) |
| <b>Montenegro</b>       | 0.24 (0.15, 0.35)     | 37.99 (23.22, 55.93) | 29.04 (18.03, 41.99)  | 0.70 (0.50, 0.90)       | 111.08 (79.94, 144.42)  | 85.11 (61.70, 110.56)   | 0.94 (0.68, 1.21)       | 149.44 (108.02, 193.16) | 114.41 (83.11, 147.56)  |
| <b>Morocco</b>          | 15.85 (10.18, 22.71)  | 46.12 (29.62, 66.05) | 53.43 (34.34, 77.10)  | 59.22 (39.29, 82.64)    | 172.28 (114.30, 240.41) | 210.24 (136.95, 298.98) | 75.30 (52.04, 101.51)   | 219.08 (151.40, 295.32) | 264.23 (181.58, 360.76) |

|                                 |                      |                      |                       |                         |                         |                         |                         |                         |                         |
|---------------------------------|----------------------|----------------------|-----------------------|-------------------------|-------------------------|-------------------------|-------------------------|-------------------------|-------------------------|
| <b>Mozambique</b>               | 6.48 (4.07, 9.58)    | 23.17 (14.54, 34.21) | 49.55 (31.12, 72.18)  | 11.62 (6.16, 18.36)     | 41.52 (22.01, 65.59)    | 68.33 (36.08, 108.85)   | 18.11 (11.57, 26.09)    | 64.70 (41.34, 93.20)    | 117.80 (75.41, 170.55)  |
| <b>Myanmar</b>                  | 14.41 (9.15, 20.69)  | 26.68 (16.94, 38.30) | 34.36 (21.95, 48.94)  | 85.73 (60.05, 113.35)   | 158.68 (111.14, 209.81) | 193.98 (139.31, 254.94) | 100.03 (71.37, 131.87)  | 185.15 (132.09, 244.09) | 228.69 (163.33, 299.93) |
| <b>Namibia</b>                  | 0.75 (0.47, 1.07)    | 30.49 (19.14, 43.78) | 54.33 (34.63, 79.02)  | 1.43 (0.87, 2.14)       | 58.35 (35.30, 87.20)    | 107.16 (65.06, 160.65)  | 2.19 (1.43, 3.08)       | 89.26 (58.27, 125.54)   | 161.94 (106.15, 227.78) |
| <b>Nepal</b>                    | 10.76 (6.99, 15.23)  | 37.67 (24.48, 53.34) | 56.55 (35.89, 80.92)  | 36.26 (24.22, 50.10)    | 127.02 (84.83, 175.47)  | 181.39 (122.63, 251.34) | 47.16 (32.78, 63.76)    | 165.17 (114.82, 223.31) | 238.33 (166.71, 319.47) |
| <b>Netherlands</b>              | 3.09 (1.97, 4.49)    | 17.96 (11.48, 26.15) | 11.61 (7.37, 17.08)   | 5.32 (3.71, 7.17)       | 30.93 (21.57, 41.71)    | 17.93 (12.50, 24.14)    | 8.40 (5.85, 11.41)      | 48.89 (34.02, 66.40)    | 29.64 (20.46, 40.00)    |
| <b>New Zealand</b>              | 0.10 (0.00, 0.29)    | 2.30 (0.00, 6.35)    | 1.71 (0.00, 4.68)     | 0.27 (0.00, 0.71)       | 5.99 (0.00, 15.48)      | 4.23 (0.00, 11.06)      | 0.38 (0.00, 0.99)       | 8.28 (0.00, 21.61)      | 5.98 (0.00, 15.66)      |
| <b>Nicaragua</b>                | 2.46 (1.61, 3.45)    | 40.37 (26.47, 56.66) | 55.95 (36.53, 79.46)  | 19.41 (13.63, 25.94)    | 318.74 (223.87, 426.02) | 430.73 (300.43, 574.81) | 21.91 (15.44, 29.17)    | 359.93 (253.60, 479.10) | 486.52 (343.82, 646.79) |
| <b>Niger</b>                    | 7.23 (4.59, 10.31)   | 36.44 (23.13, 51.95) | 83.74 (53.34, 119.47) | 19.14 (11.85, 28.03)    | 96.42 (59.70, 141.17)   | 146.12 (93.15, 208.11)  | 26.36 (17.79, 36.22)    | 132.75 (89.59, 182.42)  | 231.08 (156.91, 313.98) |
| <b>Nigeria</b>                  | 61.22 (38.09, 88.68) | 33.55 (20.87, 48.59) | 71.93 (45.61, 103.27) | 57.66 (37.92, 80.13)    | 31.60 (20.78, 43.91)    | 44.94 (29.23, 62.98)    | 119.40 (82.97, 161.55)  | 65.43 (45.47, 88.52)    | 117.66 (81.05, 158.12)  |
| <b>North Korea</b>              | 9.89 (6.46, 13.94)   | 39.31 (25.66, 55.40) | 40.32 (26.41, 57.00)  | 28.73 (20.52, 37.48)    | 114.19 (81.57, 148.96)  | 113.40 (81.07, 148.41)  | 38.69 (27.97, 50.53)    | 153.79 (111.16, 200.83) | 153.80 (111.17, 199.42) |
| <b>Northern Mariana Islands</b> | 0.02 (0.01, 0.02)    | 13.73 (8.23, 21.38)  | 25.74 (15.51, 39.61)  | 0.07 (0.04, 0.10)       | 56.73 (35.54, 85.53)    | 126.69 (80.14, 186.00)  | 0.08 (0.05, 0.12)       | 70.80 (45.02, 105.00)   | 152.32 (98.83, 222.85)  |
| <b>Norway</b>                   | 0.35 (0.19, 0.57)    | 6.69 (3.67, 11.04)   | 4.62 (2.56, 7.55)     | 0.59 (0.34, 0.91)       | 11.41 (6.67, 17.61)     | 7.13 (4.16, 11.03)      | 0.94 (0.55, 1.46)       | 18.15 (10.61, 28.26)    | 11.76 (6.86, 18.27)     |
| <b>Oman</b>                     | 2.04 (1.31, 2.90)    | 45.54 (29.20, 64.74) | 71.02 (46.68, 99.09)  | 2.27 (1.65, 2.91)       | 50.70 (36.73, 64.92)    | 113.44 (82.14, 146.06)  | 4.32 (3.09, 5.62)       | 96.49 (68.90, 125.40)   | 184.57 (133.94, 239.56) |
| <b>Pakistan</b>                 | 47.74 (30.60, 64.88) | 25.25 (16.19, 34.31) | 39.99 (25.77, 56.99)  | 292.68 (174.43, 410.93) | 154.81 (92.27, 217.35)  | 215.59 (123.95, 307.23) | 342.45 (213.87, 471.03) | 181.14 (113.12, 249.16) | 254.25 (157.33, 351.17) |

|                         |                            |                            |                          |                               |                               |                               |                               |                               |                               |
|-------------------------|----------------------------|----------------------------|--------------------------|-------------------------------|-------------------------------|-------------------------------|-------------------------------|-------------------------------|-------------------------------|
|                         | 68.12)                     | 36.03)                     |                          | 434.38)                       | 229.76)                       | 322.52)                       | 492.17)                       | 260.33)                       | 365.23)                       |
| <b>Palestine</b>        | 1.84 (1.16,<br>2.65)       | 39.37<br>(24.73,<br>56.67) | 77.71 (50.22,<br>110.75) | 6.37 (4.64,<br>8.22)          | 136.36<br>(99.30,<br>175.88)  | 312.70<br>(225.51,<br>403.20) | 8.22 (5.97,<br>10.57)         | 175.83<br>(127.80,<br>226.11) | 391.28<br>(283.36,<br>502.90) |
| <b>Panama</b>           | 0.84 (0.52,<br>1.26)       | 21.27<br>(13.18,<br>32.00) | 24.12 (14.67,<br>36.23)  | 3.17 (2.10,<br>4.53)          | 80.74<br>(53.51,<br>115.26)   | 90.28 (59.97,<br>128.36)      | 4.02 (2.69,<br>5.61)          | 102.22<br>(68.42,<br>142.71)  | 114.94 (77.67,<br>159.65)     |
| <b>Papua New Guinea</b> | 1.02 (0.58,<br>1.64)       | 13.36<br>(7.66,<br>21.46)  | 23.89 (14.06,<br>37.88)  | 7.50 (3.99,<br>12.60)         | 98.32<br>(52.22,<br>165.03)   | 164.66 (87.62,<br>270.05)     | 8.59 (4.78,<br>13.94)         | 112.56<br>(62.64,<br>182.66)  | 188.56<br>(106.76,<br>304.33) |
| <b>Paraguay</b>         | 1.07 (0.67,<br>1.58)       | 16.15<br>(10.09,<br>23.78) | 22.06 (13.58,<br>33.09)  | 7.25 (4.98,<br>9.86)          | 108.93<br>(74.87,<br>148.24)  | 149.05<br>(102.59,<br>203.04) | 8.33 (5.69,<br>11.26)         | 125.17<br>(85.58,<br>169.27)  | 171.06<br>(118.47,<br>232.34) |
| <b>Peru</b>             | 6.45 (4.15,<br>9.18)       | 20.56<br>(13.22,<br>29.25) | 25.73 (16.56,<br>36.66)  | 34.03<br>(23.23,<br>46.67)    | 108.39<br>(74.00,<br>148.65)  | 133.73 (90.56,<br>180.87)     | 40.38<br>(28.21,<br>53.89)    | 128.62<br>(89.86,<br>171.68)  | 160.05<br>(112.59,<br>214.73) |
| <b>Philippines</b>      | 28.85<br>(18.52,<br>41.30) | 28.62<br>(18.37,<br>40.97) | 40.41 (25.99,<br>57.40)  | 259.30<br>(185.16,<br>337.40) | 257.24<br>(183.69,<br>334.71) | 354.39<br>(255.63,<br>460.41) | 287.75<br>(207.53,<br>372.02) | 285.46<br>(205.87,<br>369.05) | 394.64<br>(287.96,<br>511.26) |
| <b>Poland</b>           | 16.59<br>(10.98,<br>23.41) | 42.64<br>(28.22,<br>60.15) | 29.10 (18.79,<br>41.18)  | 24.23<br>(17.69,<br>31.13)    | 62.27<br>(45.45,<br>80.01)    | 41.86 (30.51,<br>53.59)       | 40.89<br>(29.87,<br>52.59)    | 105.08<br>(76.76,<br>135.15)  | 71.27 (51.55,<br>91.90)       |
| <b>Portugal</b>         | 1.71 (0.99,<br>2.72)       | 15.81<br>(9.20,<br>25.23)  | 8.93 (5.16,<br>14.25)    | 3.81 (2.34,<br>5.70)          | 35.29<br>(21.68,<br>52.81)    | 17.91 (11.04,<br>26.83)       | 5.54 (3.39,<br>8.34)          | 51.31<br>(31.41,<br>77.26)    | 26.99 (16.50,<br>40.67)       |
| <b>Puerto Rico</b>      | 1.51 (0.97,<br>2.15)       | 40.87<br>(26.40,<br>58.46) | 30.98 (20.18,<br>44.62)  | 5.52 (3.91,<br>7.28)          | 149.97<br>(106.23,<br>197.55) | 113.91 (81.06,<br>151.00)     | 7.03 (4.97,<br>9.27)          | 190.95<br>(135.04,<br>251.55) | 145.37<br>(102.98,<br>191.07) |
| <b>Qatar</b>            | 0.89 (0.57,<br>1.27)       | 39.90<br>(25.64,<br>57.14) | 60.35 (40.19,<br>84.52)  | 0.84 (0.51,<br>1.23)          | 37.93<br>(23.17,<br>55.38)    | 118.50 (73.98,<br>173.45)     | 1.73 (1.18,<br>2.38)          | 77.95<br>(52.91,<br>107.28)   | 180.00<br>(118.76,<br>250.16) |
| <b>Romania</b>          | 6.85 (4.56,<br>9.70)       | 35.10<br>(23.33,<br>49.66) | 22.37 (14.74,<br>31.48)  | 14.11<br>(10.21,<br>18.23)    | 72.25<br>(52.29,<br>93.34)    | 47.26 (33.91,<br>61.01)       | 21.02<br>(15.03,<br>27.30)    | 107.63<br>(77.00,<br>139.82)  | 69.60 (50.30,<br>90.70)       |
| <b>Russia</b>           | 45.31<br>(27.94,<br>67.45) | 30.59<br>(18.86,<br>45.54) | 22.99 (14.08,<br>34.08)  | 54.05<br>(32.23,<br>81.33)    | 36.49<br>(21.76,<br>54.91)    | 28.25 (16.88,<br>42.28)       | 100.14<br>(66.26,<br>140.14)  | 67.61<br>(44.74,<br>94.61)    | 51.29 (34.08,<br>72.60)       |
| <b>Rwanda</b>           | 3.02 (1.87,<br>4.36)       | 25.97<br>(16.05,           | 54.12 (33.17,<br>79.17)  | 4.28 (2.55,<br>6.38)          | 36.79<br>(21.93,              | 66.56 (38.82,<br>99.41)       | 7.33 (4.95,<br>10.18)         | 63.00<br>(42.53,              | 121.20 (82.06,<br>167.28)     |



|                                         |                     |                      |                       |                      |                         |                         |                      |                         |                         |
|-----------------------------------------|---------------------|----------------------|-----------------------|----------------------|-------------------------|-------------------------|----------------------|-------------------------|-------------------------|
|                                         |                     | 37.47)               |                       |                      | 54.89)                  |                         |                      | 87.49)                  |                         |
| <b>Saint Lucia</b>                      | 0.04 (0.03, 0.07)   | 23.08 (13.90, 35.17) | 22.71 (13.76, 34.28)  | 0.20 (0.13, 0.27)    | 106.13 (72.88, 144.74)  | 103.81 (71.55, 141.19)  | 0.24 (0.17, 0.33)    | 129.38 (89.20, 176.24)  | 126.62 (87.55, 173.16)  |
| <b>Saint Vincent and the Grenadines</b> | 0.02 (0.02, 0.04)   | 22.50 (13.87, 33.75) | 24.70 (15.16, 37.46)  | 0.13 (0.09, 0.18)    | 121.90 (84.02, 166.76)  | 130.26 (90.01, 177.81)  | 0.16 (0.11, 0.22)    | 144.55 (99.57, 196.30)  | 155.22 (106.97, 212.14) |
| <b>Samoa</b>                            | 0.00 (0.00, 0.01)   | 0.00 (0.00, 3.84)    | 0.00 (0.00, 5.70)     | 0.00 (0.00, 0.04)    | 0.00 (0.00, 21.72)      | 0.00 (0.00, 32.36)      | 0.00 (0.00, 0.05)    | 0.00 (0.00, 25.64)      | 0.00 (0.00, 38.51)      |
| <b>Sao Tome and Principe</b>            | 0.05 (0.03, 0.07)   | 25.35 (15.10, 38.77) | 48.74 (29.60, 73.96)  | 0.17 (0.11, 0.26)    | 91.25 (57.95, 133.66)   | 153.48 (99.48, 221.91)  | 0.22 (0.14, 0.32)    | 116.63 (75.83, 168.74)  | 201.80 (134.38, 288.06) |
| <b>Saudi Arabia</b>                     | 13.27 (8.63, 18.98) | 42.23 (27.44, 60.38) | 62.93 (41.40, 88.25)  | 34.01 (24.58, 43.86) | 108.19 (78.18, 139.51)  | 227.28 (166.46, 290.61) | 47.31 (34.52, 61.01) | 150.50 (109.80, 194.09) | 291.08 (211.88, 372.82) |
| <b>Senegal</b>                          | 6.52 (4.13, 9.37)   | 43.18 (27.36, 62.00) | 89.98 (57.24, 129.26) | 17.32 (12.26, 22.75) | 114.64 (81.16, 150.60)  | 189.77 (136.70, 246.60) | 23.92 (17.22, 31.12) | 158.33 (113.97, 205.94) | 280.40 (202.56, 362.00) |
| <b>Serbia</b>                           | 3.62 (2.36, 5.13)   | 40.87 (26.60, 57.97) | 26.73 (17.55, 38.13)  | 10.32 (7.49, 13.20)  | 116.57 (84.53, 149.08)  | 75.89 (55.14, 97.25)    | 13.91 (10.13, 17.91) | 157.10 (114.42, 202.25) | 102.82 (74.80, 132.19)  |
| <b>Seychelles</b>                       | 0.02 (0.01, 0.02)   | 16.72 (9.88, 25.59)  | 17.41 (10.55, 26.44)  | 0.15 (0.10, 0.22)    | 157.96 (104.85, 223.41) | 165.03 (110.66, 233.29) | 0.17 (0.11, 0.24)    | 175.10 (117.35, 245.78) | 182.95 (123.36, 256.84) |
| <b>Sierra Leone</b>                     | 1.76 (1.09, 2.61)   | 27.31 (16.90, 40.32) | 57.89 (35.55, 86.10)  | 5.04 (3.25, 7.28)    | 77.97 (50.36, 112.65)   | 115.11 (76.06, 165.01)  | 6.81 (4.62, 9.62)    | 105.39 (71.44, 148.83)  | 173.17 (116.39, 240.75) |
| <b>Singapore</b>                        | 1.56 (1.03, 2.22)   | 39.79 (26.21, 56.48) | 31.23 (20.24, 43.99)  | 2.85 (1.93, 3.94)    | 72.51 (49.28, 100.30)   | 59.44 (40.45, 82.38)    | 4.42 (3.07, 5.94)    | 112.75 (78.29, 151.41)  | 91.04 (63.80, 122.34)   |
| <b>Slovakia</b>                         | 2.05 (1.30, 2.92)   | 36.82 (23.46, 52.56) | 26.93 (17.23, 38.62)  | 3.67 (2.63, 4.82)    | 66.15 (47.33, 86.81)    | 48.08 (34.41, 63.01)    | 5.74 (4.13, 7.48)    | 103.39 (74.37, 134.71)  | 75.35 (53.37, 98.22)    |
| <b>Slovenia</b>                         | 0.76 (0.49, 1.09)   | 36.97 (23.84, 52.95) | 22.44 (14.62, 31.75)  | 0.74 (0.53, 0.96)    | 35.71 (25.55, 46.58)    | 19.26 (13.81, 25.17)    | 1.50 (1.07, 1.98)    | 72.72 (51.62, 95.92)    | 41.95 (29.69, 55.35)    |
| <b>Solomon Islands</b>                  | 0.02 (0.00, 0.05)   | 2.71 (0.00, 8.38)    | 4.99 (0.00, 15.26)    | 0.14 (0.00, 0.41)    | 23.14 (0.00, 70.41)     | 40.62 (0.00, 123.55)    | 0.15 (0.00, 0.46)    | 25.72 (0.00, 77.88)     | 45.76 (0.00, 138.00)    |

|                     |                      |                      |                       |                       |                         |                         |                        |                         |                         |
|---------------------|----------------------|----------------------|-----------------------|-----------------------|-------------------------|-------------------------|------------------------|-------------------------|-------------------------|
| <b>Somalia</b>      | 2.96 (1.85, 4.35)    | 27.31 (17.04, 40.10) | 57.58 (36.03, 84.84)  | 5.51 (3.55, 7.90)     | 50.78 (32.77, 72.85)    | 89.84 (58.08, 129.98)   | 8.53 (5.80, 11.81)     | 78.63 (53.43, 108.87)   | 148.16 (100.71, 204.83) |
| <b>South Africa</b> | 27.41 (17.89, 38.81) | 51.02 (33.31, 72.23) | 67.92 (44.54, 95.71)  | 81.03 (59.31, 102.93) | 150.82 (110.39, 191.60) | 190.53 (139.55, 242.61) | 108.75 (79.90, 138.51) | 202.42 (148.72, 257.83) | 259.46 (189.72, 330.98) |
| <b>South Korea</b>  | 24.09 (16.23, 33.14) | 47.91 (32.28, 65.91) | 35.22 (23.78, 48.74)  | 32.63 (21.06, 45.80)  | 64.89 (41.88, 91.08)    | 47.57 (31.30, 67.16)    | 56.83 (40.04, 75.77)   | 113.03 (79.62, 150.69)  | 83.04 (58.26, 110.17)   |
| <b>South Sudan</b>  | 4.16 (2.62, 5.98)    | 33.85 (21.28, 48.68) | 71.82 (44.86, 104.50) | 6.02 (3.84, 8.64)     | 48.97 (31.25, 70.29)    | 83.15 (52.95, 119.74)   | 10.22 (7.03, 13.78)    | 83.14 (57.24, 112.15)   | 155.42 (107.47, 212.16) |
| <b>Spain</b>        | 8.34 (4.81, 13.36)   | 17.11 (9.87, 27.41)  | 10.21 (5.88, 16.32)   | 11.66 (7.25, 17.41)   | 23.92 (14.87, 35.71)    | 11.96 (7.42, 17.73)     | 20.04 (12.24, 30.13)   | 41.11 (25.12, 61.80)    | 22.12 (13.53, 33.48)    |
| <b>Sri Lanka</b>    | 6.74 (4.41, 9.60)    | 32.50 (21.25, 46.29) | 32.31 (20.93, 45.89)  | 30.64 (20.66, 41.83)  | 147.68 (99.59, 201.61)  | 145.77 (100.00, 197.32) | 37.46 (26.07, 50.17)   | 180.56 (125.66, 241.80) | 178.26 (125.31, 238.47) |
| <b>Sudan</b>        | 17.14 (11.07, 24.14) | 42.44 (27.40, 59.77) | 75.61 (50.12, 105.62) | 54.41 (36.50, 74.99)  | 134.71 (90.36, 185.67)  | 234.94 (156.60, 330.04) | 71.81 (49.63, 95.93)   | 177.81 (122.88, 237.51) | 311.20 (213.50, 423.15) |
| <b>Suriname</b>     | 0.14 (0.09, 0.20)    | 25.84 (16.27, 37.78) | 29.49 (18.58, 43.47)  | 0.92 (0.64, 1.24)     | 169.52 (118.42, 228.60) | 193.35 (134.48, 259.66) | 1.06 (0.74, 1.42)      | 195.57 (136.51, 262.14) | 223.20 (155.73, 298.41) |
| <b>Swaziland</b>    | 0.44 (0.29, 0.64)    | 34.42 (22.15, 49.72) | 66.36 (42.53, 94.95)  | 1.07 (0.55, 1.69)     | 83.05 (42.89, 131.20)   | 159.16 (84.75, 252.88)  | 1.51 (0.93, 2.23)      | 117.26 (71.89, 173.20)  | 224.89 (141.20, 332.16) |
| <b>Sweden</b>       | 0.36 (0.05, 0.80)    | 3.69 (0.55, 8.14)    | 2.26 (0.34, 5.03)     | 0.59 (0.09, 1.22)     | 5.99 (0.87, 12.47)      | 3.22 (0.48, 6.74)       | 0.95 (0.14, 1.98)      | 9.73 (1.43, 20.17)      | 5.52 (0.82, 11.48)      |
| <b>Switzerland</b>  | 1.71 (1.05, 2.59)    | 20.64 (12.68, 31.26) | 13.02 (7.91, 19.65)   | 2.11 (1.34, 3.10)     | 25.54 (16.22, 37.49)    | 13.62 (8.63, 20.04)     | 3.84 (2.53, 5.47)      | 46.38 (30.56, 66.14)    | 26.68 (17.56, 38.31)    |
| <b>Syria</b>        | 7.11 (4.50, 10.34)   | 38.18 (24.18, 55.51) | 60.33 (38.67, 86.39)  | 16.36 (10.44, 23.32)  | 87.86 (56.05, 125.22)   | 141.61 (81.93, 212.25)  | 23.61 (16.44, 31.59)   | 126.79 (88.26, 169.63)  | 201.75 (134.52, 283.36) |
| <b>Tajikistan</b>   | 2.82 (1.79, 4.05)    | 33.23 (21.02, 47.65) | 58.23 (37.24, 83.38)  | 7.10 (4.96, 9.50)     | 83.52 (58.29, 111.75)   | 105.21 (73.36, 140.51)  | 9.96 (7.14, 13.14)     | 117.10 (84.04, 154.52)  | 163.73 (117.63, 214.65) |
| <b>Tanzania</b>     | 13.76 (8.49, 19.22)  | 25.79 (15.92, 35.66) | 55.74 (35.21, 80.51)  | 27.22 (19.17, 35.27)  | 51.00 (35.92, 66.08)    | 87.12 (61.28, 116.64)   | 41.06 (29.18, 52.94)   | 76.94 (54.67, 99.21)    | 143.21 (100.95, 185.47) |



|                             |                            |                             |                          |                               |                               |                               |                               |                               |                               |
|-----------------------------|----------------------------|-----------------------------|--------------------------|-------------------------------|-------------------------------|-------------------------------|-------------------------------|-------------------------------|-------------------------------|
|                             | 20.08)                     | 37.61)                      |                          | 36.19)                        | 67.81)                        |                               | 54.43)                        | 101.99)                       | 190.96)                       |
| <b>Thailand</b>             | 27.14<br>(17.67,<br>38.62) | 39.97<br>(26.03,<br>56.88)  | 33.88 (22.16,<br>47.79)  | 140.01<br>(101.18,<br>180.95) | 206.22<br>(149.02,<br>266.52) | 171.39<br>(123.59,<br>221.15) | 167.25<br>(121.13,<br>215.36) | 246.34<br>(178.41,<br>317.21) | 205.12<br>(148.73,<br>264.89) |
| <b>The Bahamas</b>          | 0.07 (0.05,<br>0.11)       | 19.36<br>(11.85,<br>29.42)  | 19.87 (12.22,<br>30.23)  | 0.41 (0.28,<br>0.57)          | 105.56<br>(71.18,<br>147.20)  | 105.35 (71.38,<br>147.16)     | 0.49 (0.33,<br>0.67)          | 125.28<br>(84.18,<br>173.53)  | 125.71 (84.37,<br>174.29)     |
| <b>The Gambia</b>           | 0.68 (0.42,<br>0.98)       | 33.86<br>(20.99,<br>48.78)  | 81.01 (51.16,<br>116.49) | 1.49 (1.01,<br>2.04)          | 74.24<br>(50.69,<br>102.08)   | 130.92 (90.23,<br>176.72)     | 2.17 (1.52,<br>2.89)          | 108.35<br>(76.15,<br>144.33)  | 212.34<br>(150.15,<br>281.19) |
| <b>Timor-Leste</b>          | 0.13 (0.08,<br>0.19)       | 10.59<br>(6.62,<br>15.79)   | 18.13 (11.17,<br>26.69)  | 0.55 (0.32,<br>0.85)          | 46.57<br>(27.21,<br>71.11)    | 71.35 (42.26,<br>109.34)      | 0.68 (0.42,<br>1.01)          | 57.16<br>(35.65,<br>84.79)    | 90.03 (56.96,<br>132.62)      |
| <b>Togo</b>                 | 2.88 (1.81,<br>4.13)       | 39.41<br>(24.84,<br>56.55)  | 78.92 (50.62,<br>112.90) | 6.49 (3.96,<br>9.52)          | 88.94<br>(54.21,<br>130.42)   | 140.32 (86.84,<br>207.76)     | 9.36 (6.26,<br>13.02)         | 128.21<br>(85.77,<br>178.27)  | 220.62<br>(147.56,<br>303.58) |
| <b>Tonga</b>                | 0.00 (0.00,<br>0.00)       | 0.00 (0.00,<br>4.34)        | 0.00 (0.00,<br>6.18)     | 0.00 (0.00,<br>0.03)          | 0.00 (0.00,<br>27.12)         | 0.00 (0.00,<br>39.21)         | 0.00 (0.00,<br>0.03)          | 0.00 (0.00,<br>31.16)         | 0.00 (0.00,<br>45.13)         |
| <b>Trinidad and Tobago</b>  | 0.36 (0.22,<br>0.54)       | 26.48<br>(16.42,<br>39.35)  | 24.67 (15.46,<br>36.58)  | 1.76 (1.20,<br>2.41)          | 129.36<br>(88.11,<br>177.01)  | 117.31 (79.95,<br>160.41)     | 2.12 (1.45,<br>2.91)          | 155.66<br>(106.50,<br>213.89) | 142.26 (97.78,<br>193.90)     |
| <b>Tunisia</b>              | 7.08 (4.62,<br>9.84)       | 62.89<br>(41.10,<br>87.50)  | 64.17 (42.47,<br>90.61)  | 16.92<br>(10.83,<br>24.13)    | 150.41<br>(96.24,<br>214.47)  | 166.49<br>(106.85,<br>237.69) | 24.11<br>(16.42,<br>33.07)    | 214.31<br>(145.96,<br>293.94) | 230.95<br>(156.75,<br>318.41) |
| <b>Turkey</b>               | 63.22<br>(41.62,<br>88.48) | 80.61<br>(53.08,<br>112.82) | 86.19 (56.33,<br>121.10) | 79.28<br>(54.93,<br>107.65)   | 101.09<br>(70.05,<br>137.27)  | 113.99 (78.91,<br>153.13)     | 143.05<br>(102.67,<br>187.25) | 182.41<br>(130.92,<br>238.78) | 200.99<br>(144.30,<br>264.54) |
| <b>Turkmenistan</b>         | 2.53 (1.63,<br>3.64)       | 47.09<br>(30.30,<br>67.69)  | 67.91 (42.54,<br>98.10)  | 8.66 (6.36,<br>10.90)         | 160.90<br>(118.25,<br>202.64) | 198.23<br>(145.67,<br>249.49) | 11.23<br>(8.23,<br>14.21)     | 208.67<br>(152.91,<br>264.14) | 266.68<br>(195.69,<br>338.43) |
| <b>Uganda</b>               | 9.17 (5.72,<br>13.20)      | 23.42<br>(14.61,<br>33.71)  | 60.85 (38.80,<br>87.27)  | 19.21<br>(13.48,<br>25.56)    | 49.06<br>(34.42,<br>65.29)    | 95.39 (67.65,<br>125.88)      | 28.37<br>(20.17,<br>37.25)    | 72.46<br>(51.51,<br>95.13)    | 156.82<br>(111.58,<br>207.31) |
| <b>Ukraine</b>              | 13.52<br>(8.37,<br>19.79)  | 29.06<br>(18.00,<br>42.55)  | 20.19 (12.64,<br>29.78)  | 13.19<br>(8.56,<br>18.92)     | 28.36<br>(18.41,<br>40.67)    | 21.20 (13.61,<br>30.58)       | 26.74<br>(18.11,<br>36.66)    | 57.49<br>(38.94,<br>78.83)    | 41.62 (28.40,<br>57.65)       |
| <b>United Arab Emirates</b> | 4.95 (3.20,<br>7.04)       | 54.16<br>(34.96,<br>76.97)  | 74.23 (48.95,<br>105.11) | 11.09<br>(6.58,<br>16.60)     | 121.26<br>(71.91,<br>181.56)  | 226.66<br>(140.67,<br>329.49) | 16.03<br>(10.55,<br>22.82)    | 175.24<br>(115.35,<br>249.54) | 302.07<br>(200.89,<br>419.93) |

1  
2  
3  
4  
5  
6  
7  
8  
9  
10  
11  
12  
13  
14  
15  
16  
17  
18  
19  
20  
21  
22  
23  
24  
25  
26  
27  
28  
29  
30  
31  
32  
33  
34  
35  
36  
37  
38  
39  
40  
41  
42  
43  
44  
45  
46  
47

|                             |                       |                      |                       |                        |                         |                         |                         |                         |                         |
|-----------------------------|-----------------------|----------------------|-----------------------|------------------------|-------------------------|-------------------------|-------------------------|-------------------------|-------------------------|
| <b>United Kingdom</b>       | 9.60 (5.90, 14.42)    | 14.94 (9.19, 22.45)  | 9.70 (6.06, 14.53)    | 11.85 (8.08, 16.24)    | 18.45 (12.57, 25.27)    | 11.01 (7.52, 15.09)     | 21.50 (14.36, 30.15)    | 33.47 (22.35, 46.93)    | 20.75 (13.83, 29.21)    |
| <b>United States</b>        | 61.54 (32.36, 105.07) | 19.02 (10.00, 32.48) | 14.51 (7.59, 24.72)   | 104.78 (58.14, 165.08) | 32.39 (17.97, 51.03)    | 23.30 (12.96, 36.77)    | 166.61 (91.84, 264.98)  | 51.50 (28.39, 81.90)    | 37.92 (20.91, 60.47)    |
| <b>Uruguay</b>              | 0.71 (0.43, 1.08)     | 20.69 (12.56, 31.57) | 15.67 (9.62, 24.00)   | 1.53 (1.01, 2.16)      | 44.42 (29.32, 62.88)    | 32.94 (21.77, 46.83)    | 2.24 (1.47, 3.18)       | 65.20 (42.90, 92.65)    | 48.80 (31.93, 69.47)    |
| <b>Uzbekistan</b>           | 11.53 (7.50, 16.42)   | 38.51 (25.05, 54.83) | 53.53 (34.39, 76.99)  | 39.04 (28.32, 50.30)   | 130.39 (94.60, 167.99)  | 148.03 (107.44, 190.30) | 50.65 (36.81, 64.96)    | 169.18 (122.95, 216.98) | 201.97 (146.53, 259.25) |
| <b>Vanuatu</b>              | 0.01 (0.00, 0.03)     | 5.58 (1.61, 11.49)   | 9.25 (2.66, 19.08)    | 0.12 (0.03, 0.25)      | 45.10 (12.84, 94.05)    | 71.48 (20.34, 148.26)   | 0.13 (0.04, 0.28)       | 51.16 (14.58, 106.04)   | 80.50 (23.32, 165.50)   |
| <b>Venezuela</b>            | 11.03 (7.21, 15.68)   | 35.44 (23.19, 50.42) | 44.25 (29.06, 63.09)  | 56.58 (40.06, 75.49)   | 181.91 (128.77, 242.68) | 224.40 (158.78, 299.11) | 67.82 (48.29, 88.71)    | 218.03 (155.25, 285.18) | 269.20 (192.79, 351.74) |
| <b>Vietnam</b>              | 20.60 (13.42, 29.12)  | 22.04 (14.36, 31.16) | 24.02 (15.53, 34.04)  | 123.68 (88.51, 161.51) | 132.32 (94.69, 172.79)  | 147.11 (105.04, 192.10) | 144.22 (103.44, 188.31) | 154.29 (110.66, 201.46) | 171.04 (123.43, 221.91) |
| <b>Virgin Islands, U.S.</b> | 0.03 (0.02, 0.05)     | 31.63 (19.64, 46.93) | 21.89 (13.33, 32.72)  | 0.17 (0.12, 0.23)      | 159.81 (109.28, 220.35) | 106.73 (72.23, 147.83)  | 0.21 (0.14, 0.28)       | 192.64 (132.92, 261.64) | 128.74 (88.45, 176.67)  |
| <b>Yemen</b>                | 10.76 (6.86, 15.33)   | 39.99 (25.51, 56.97) | 83.25 (54.04, 117.66) | 30.76 (18.58, 44.88)   | 114.32 (69.06, 166.75)  | 243.61 (148.90, 356.94) | 41.43 (27.53, 58.27)    | 153.93 (102.30, 216.52) | 327.43 (212.41, 459.04) |
| <b>Zambia</b>               | 4.42 (2.80, 6.28)     | 27.20 (17.24, 38.63) | 60.68 (38.79, 86.73)  | 10.69 (7.18, 14.66)    | 65.77 (44.21, 90.22)    | 119.87 (80.00, 165.72)  | 15.13 (10.63, 20.18)    | 93.12 (65.40, 124.18)   | 181.28 (127.74, 242.93) |
| <b>Zimbabwe</b>             | 5.27 (3.33, 7.56)     | 33.85 (21.41, 48.53) | 71.70 (45.37, 103.06) | 14.99 (9.74, 21.22)    | 96.26 (62.54, 136.27)   | 205.12 (133.09, 292.11) | 20.33 (13.95, 27.55)    | 130.52 (89.56, 176.88)  | 278.23 (188.52, 380.20) |

YLD, Years living with disability; YLL, Years of life lost; DALY, Disability adjusted life years

**Supplemental table 3:** Frontier analysis for age standardized disability adjusted life years (DALY) rates and risk deleted DALY rates by Socio-demographic Index (SDI).

| Country                    | Region                  | Socio-demographic Index | DALY (Per 100,000) | Frontier (DALY Per 100,000) | Effective Difference (DALY Per 100,000) | Risk Deleted       |                             |                                         |
|----------------------------|-------------------------|-------------------------|--------------------|-----------------------------|-----------------------------------------|--------------------|-----------------------------|-----------------------------------------|
|                            |                         |                         |                    |                             |                                         | DALY (Per 100,000) | Frontier (DALY Per 100,000) | Effective Difference (DALY Per 100,000) |
| <b>Afghanistan</b>         | West & Central Asia     | 0.289                   | 616.34             | 116.07                      | 500.27                                  | 254.21             | 54.46                       | 199.75                                  |
| <b>Albania</b>             | Europe                  | 0.736                   | 80.29              | 8.72                        | 71.57                                   | 58.44              | 0.60                        | 57.83                                   |
| <b>Algeria</b>             | North Africa            | 0.590                   | 233.92             | 39.80                       | 194.13                                  | 93.55              | 6.71                        | 86.84                                   |
| <b>American Samoa</b>      | Oceania                 | 0.714                   | 0.00               | 2.83                        | 0.00                                    | 0.00               | 0.23                        | 0.00                                    |
| <b>Andorra</b>             | Europe                  | 0.919                   | 12.19              | 1.35                        | 10.84                                   | 6.40               | 0.12                        | 6.27                                    |
| <b>Angola</b>              | Sub-Saharan Africa      | 0.419                   | 151.41             | 84.75                       | 66.66                                   | 75.46              | 37.27                       | 38.19                                   |
| <b>Antigua and Barbuda</b> | North & Central America | 0.841                   | 119.87             | 3.49                        | 116.38                                  | 61.13              | 0.25                        | 60.88                                   |
| <b>Argentina</b>           | South America           | 0.772                   | 88.69              | 4.97                        | 83.71                                   | 41.39              | 0.29                        | 41.10                                   |
| <b>Armenia</b>             | West & Central Asia     | 0.755                   | 118.22             | 6.88                        | 111.34                                  | 59.73              | 0.57                        | 59.16                                   |
| <b>Australia</b>           | Oceania                 | 0.915                   | 6.46               | 1.18                        | 5.28                                    | 2.13               | 0.09                        | 2.04                                    |
| <b>Austria</b>             | Europe                  | 0.888                   | 52.55              | 2.56                        | 50.00                                   | 24.99              | 0.17                        | 24.81                                   |
| <b>Azerbaijan</b>          | West & Central Asia     | 0.788                   | 173.98             | 5.28                        | 168.70                                  | 94.95              | 0.33                        | 94.63                                   |
| <b>Bahrain</b>             | West & Central Asia     | 0.776                   | 234.56             | 4.80                        | 229.76                                  | 86.84              | 0.25                        | 86.58                                   |
| <b>Bangladesh</b>          | South & Southeast Asia  | 0.472                   | 183.21             | 62.05                       | 121.16                                  | 80.55              | 18.48                       | 62.07                                   |
| <b>Barbados</b>            | North & Central America | 0.782                   | 110.85             | 5.00                        | 105.84                                  | 56.37              | 0.33                        | 56.04                                   |
| <b>Belarus</b>             | East Asia               | 0.847                   | 49.26              | 3.59                        | 45.67                                   | 33.58              | 0.25                        | 33.33                                   |
| <b>Belgium</b>             | Europe                  | 0.882                   | 35.87              | 3.56                        | 32.31                                   | 18.20              | 0.18                        | 18.01                                   |

|                                     |                                        |       |        |        |        |        |       |        |
|-------------------------------------|----------------------------------------|-------|--------|--------|--------|--------|-------|--------|
| <b>Belize</b>                       | Mesoamerica<br>(or Central<br>America) | 0.665 | 356.94 | 14.40  | 342.54 | 184.41 | 1.25  | 183.16 |
| <b>Benin</b>                        | Sub-Saharan<br>Africa                  | 0.345 | 254.04 | 105.60 | 148.45 | 132.65 | 48.47 | 84.18  |
| <b>Bermuda</b>                      | North & Central<br>America             | 0.916 | 36.76  | 1.44   | 35.32  | 17.23  | 0.13  | 17.10  |
| <b>Bhutan</b>                       | South &<br>Southeast Asia              | 0.532 | 220.68 | 46.18  | 174.49 | 87.52  | 10.15 | 77.37  |
| <b>Bolivia</b>                      | South America                          | 0.612 | 316.08 | 41.66  | 274.43 | 164.20 | 6.46  | 157.74 |
| <b>Bosnia and<br/>Herzegovina</b>   | Europe                                 | 0.739 | 100.14 | 9.33   | 90.82  | 56.03  | 0.61  | 55.42  |
| <b>Botswana</b>                     | Sub-Saharan<br>Africa                  | 0.641 | 151.38 | 16.86  | 134.52 | 71.40  | 1.69  | 69.71  |
| <b>Brazil</b>                       | South America                          | 0.662 | 64.76  | 14.60  | 50.17  | 32.98  | 1.42  | 31.56  |
| <b>Brunei</b>                       | South &<br>Southeast Asia              | 0.923 | 10.86  | 0.95   | 9.91   | 2.89   | 0.06  | 2.83   |
| <b>Bulgaria</b>                     | Europe                                 | 0.808 | 105.94 | 4.59   | 101.35 | 60.69  | 0.33  | 60.36  |
| <b>Burkina Faso</b>                 | Sub-Saharan<br>Africa                  | 0.237 | 190.49 | 175.07 | 15.41  | 95.27  | 86.52 | 8.75   |
| <b>Burundi</b>                      | Sub-Saharan<br>Africa                  | 0.240 | 149.74 | 142.05 | 7.69   | 77.83  | 70.89 | 6.95   |
| <b>Cambodia</b>                     | South &<br>Southeast Asia              | 0.486 | 194.04 | 45.95  | 148.09 | 29.25  | 9.69  | 19.57  |
| <b>Cameroon</b>                     | Sub-Saharan<br>Africa                  | 0.464 | 255.04 | 69.10  | 185.94 | 133.55 | 20.26 | 113.29 |
| <b>Canada</b>                       | North America                          | 0.938 | 12.13  | 1.20   | 10.94  | 3.51   | 0.12  | 3.38   |
| <b>Cape Verde</b>                   | Sub-Saharan<br>Africa                  | 0.549 | 210.82 | 43.63  | 167.18 | 101.07 | 8.52  | 92.55  |
| <b>Central African<br/>Republic</b> | Sub-Saharan<br>Africa                  | 0.282 | 191.79 | 134.31 | 57.48  | 97.07  | 63.65 | 33.42  |
| <b>Chad</b>                         | Sub-Saharan<br>Africa                  | 0.287 | 264.19 | 113.38 | 150.81 | 139.83 | 53.35 | 86.48  |
| <b>Chile</b>                        | South America                          | 0.805 | 129.54 | 5.44   | 124.10 | 58.36  | 0.35  | 58.01  |
| <b>China</b>                        | East Asia                              | 0.678 | 105.79 | 14.21  | 91.58  | 20.33  | 1.30  | 19.03  |
| <b>Colombia</b>                     | South America                          | 0.700 | 127.67 | 14.30  | 113.37 | 66.21  | 1.14  | 65.07  |
| <b>Comoros</b>                      | Sub-Saharan                            | 0.365 | 103.08 | 83.92  | 19.17  | 51.34  | 38.59 | 12.74  |

|                                         |                                  |       |        |        |        |        |       |        |
|-----------------------------------------|----------------------------------|-------|--------|--------|--------|--------|-------|--------|
|                                         | Africa                           |       |        |        |        |        |       |        |
| <b>Congo</b>                            | Sub-Saharan Africa               | 0.527 | 165.95 | 47.33  | 118.62 | 81.54  | 10.61 | 70.93  |
| <b>Costa Rica</b>                       | Mesoamerica (or Central America) | 0.723 | 174.96 | 8.10   | 166.86 | 85.79  | 0.48  | 85.31  |
| <b>Cote d'Ivoire</b>                    | Sub-Saharan Africa               | 0.381 | 270.82 | 89.20  | 181.62 | 137.83 | 40.47 | 97.36  |
| <b>Croatia</b>                          | Europe                           | 0.784 | 69.03  | 4.71   | 64.31  | 34.25  | 0.27  | 33.97  |
| <b>Cuba</b>                             | North & Central America          | 0.766 | 87.58  | 4.73   | 82.85  | 43.90  | 0.36  | 43.54  |
| <b>Cyprus</b>                           | West & Central Asia              | 0.881 | 78.41  | 3.63   | 74.78  | 40.49  | 0.26  | 40.23  |
| <b>Czech Republic</b>                   | Europe                           | 0.892 | 58.62  | 2.54   | 56.08  | 32.15  | 0.18  | 31.98  |
| <b>Democratic Republic of the Congo</b> | Sub-Saharan Africa               | 0.239 | 143.94 | 142.01 | 1.93   | 71.79  | 69.93 | 1.86   |
| <b>Denmark</b>                          | Europe                           | 0.910 | 23.27  | 1.52   | 21.75  | 12.35  | 0.11  | 12.24  |
| <b>Djibouti</b>                         | Sub-Saharan Africa               | 0.462 | 159.20 | 68.65  | 90.55  | 78.25  | 20.59 | 57.66  |
| <b>Dominica</b>                         | North & Central America          | 0.753 | 170.57 | 7.01   | 163.56 | 84.96  | 0.56  | 84.40  |
| <b>Dominican Republic</b>               | North & Central America          | 0.684 | 143.44 | 14.86  | 128.58 | 75.39  | 1.34  | 74.05  |
| <b>Ecuador</b>                          | South America                    | 0.685 | 142.20 | 12.78  | 129.42 | 71.94  | 1.13  | 70.80  |
| <b>Egypt</b>                            | North Africa                     | 0.619 | 273.55 | 40.74  | 232.80 | 110.54 | 6.36  | 104.19 |
| <b>El Salvador</b>                      | Mesoamerica (or Central America) | 0.619 | 543.35 | 41.79  | 501.56 | 270.61 | 6.88  | 263.74 |
| <b>Equatorial Guinea</b>                | Sub-Saharan Africa               | 0.609 | 127.91 | 41.46  | 86.45  | 61.33  | 6.54  | 54.79  |
| <b>Eritrea</b>                          | Sub-Saharan Africa               | 0.324 | 156.58 | 102.14 | 54.45  | 79.37  | 47.31 | 32.06  |
| <b>Estonia</b>                          | Europe                           | 0.861 | 25.83  | 3.33   | 22.49  | 13.73  | 0.23  | 13.50  |
| <b>Ethiopia</b>                         | Sub-Saharan Africa               | 0.302 | 177.87 | 110.01 | 67.86  | 88.62  | 51.26 | 37.36  |
| <b>Federated States of</b>              | Oceania                          | 0.624 | 80.06  | 21.75  | 58.31  | 10.95  | 1.86  | 9.09   |

|                      |                                  |       |        |        |        |        |       |        |
|----------------------|----------------------------------|-------|--------|--------|--------|--------|-------|--------|
| <b>Micronesia</b>    |                                  |       |        |        |        |        |       |        |
| <b>Fiji</b>          | Oceania                          | 0.693 | 74.23  | 12.92  | 61.31  | 12.32  | 0.92  | 11.40  |
| <b>Finland</b>       | Europe                           | 0.893 | 6.67   | 1.45   | 5.22   | 3.32   | 0.13  | 3.19   |
| <b>France</b>        | Europe                           | 0.834 | 21.98  | 3.49   | 18.48  | 11.39  | 0.29  | 11.10  |
| <b>Gabon</b>         | Sub-Saharan Africa               | 0.644 | 169.15 | 15.21  | 153.94 | 80.92  | 1.37  | 79.55  |
| <b>Georgia</b>       | West & Central Asia              | 0.761 | 162.56 | 4.45   | 158.11 | 91.66  | 0.33  | 91.34  |
| <b>Germany</b>       | Europe                           | 0.903 | 39.52  | 1.59   | 37.94  | 19.02  | 0.15  | 18.87  |
| <b>Ghana</b>         | Sub-Saharan Africa               | 0.511 | 221.70 | 46.74  | 174.96 | 111.84 | 11.38 | 100.46 |
| <b>Greece</b>        | Europe                           | 0.825 | 42.42  | 4.12   | 38.30  | 19.09  | 0.35  | 18.74  |
| <b>Greenland</b>     | Europe                           | 0.758 | 6.15   | 2.04   | 4.10   | 1.48   | 0.16  | 1.33   |
| <b>Grenada</b>       | North & Central America          | 0.753 | 212.35 | 7.33   | 205.03 | 110.85 | 0.58  | 110.27 |
| <b>Guam</b>          | Oceania                          | 0.884 | 50.69  | 3.51   | 47.17  | 7.89   | 0.21  | 7.68   |
| <b>Guatemala</b>     | Mesoamerica (or Central America) | 0.543 | 408.41 | 42.19  | 366.22 | 205.05 | 8.06  | 197.00 |
| <b>Guinea</b>        | Sub-Saharan Africa               | 0.278 | 200.40 | 148.97 | 51.42  | 102.86 | 72.22 | 30.64  |
| <b>Guinea-Bissau</b> | Sub-Saharan Africa               | 0.294 | 349.02 | 115.70 | 233.32 | 178.80 | 54.47 | 124.32 |
| <b>Guyana</b>        | South America                    | 0.655 | 193.49 | 15.00  | 178.49 | 101.06 | 1.33  | 99.73  |
| <b>Haiti</b>         | North & Central America          | 0.412 | 336.51 | 87.21  | 249.30 | 186.15 | 39.17 | 146.98 |
| <b>Honduras</b>      | Mesoamerica (or Central America) | 0.568 | 429.86 | 43.74  | 386.12 | 216.42 | 7.94  | 208.49 |
| <b>Hungary</b>       | Europe                           | 0.849 | 73.26  | 3.96   | 69.29  | 37.00  | 0.29  | 36.72  |
| <b>Iceland</b>       | Europe                           | 0.893 | 8.05   | 1.32   | 6.72   | 4.67   | 0.10  | 4.56   |
| <b>India</b>         | South & Southeast Asia           | 0.556 | 238.25 | 41.39  | 196.86 | 96.78  | 8.04  | 88.74  |
| <b>Indonesia</b>     | South & Southeast Asia           | 0.652 | 122.19 | 15.71  | 106.48 | 21.58  | 1.40  | 20.18  |
| <b>Iran</b>          | West & Central                   | 0.715 | 176.65 | 8.26   | 168.39 | 65.88  | 0.58  | 65.30  |

|                   |                         |       |        |       |        |        |       |        |
|-------------------|-------------------------|-------|--------|-------|--------|--------|-------|--------|
|                   | Asia                    |       |        |       |        |        |       |        |
| <b>Iraq</b>       | West & Central Asia     | 0.576 | 419.84 | 43.41 | 376.43 | 162.62 | 7.59  | 155.02 |
| <b>Ireland</b>    | Europe                  | 0.885 | 18.27  | 2.28  | 15.99  | 9.74   | 0.18  | 9.56   |
| <b>Israel</b>     | West & Central Asia     | 0.842 | 124.05 | 3.98  | 120.07 | 31.83  | 0.33  | 31.50  |
| <b>Italy</b>      | Europe                  | 0.856 | 48.45  | 3.83  | 44.62  | 25.21  | 0.29  | 24.92  |
| <b>Jamaica</b>    | North & Central America | 0.719 | 182.02 | 7.82  | 174.20 | 93.27  | 0.54  | 92.73  |
| <b>Japan</b>      | East Asia               | 0.896 | 45.26  | 1.46  | 43.80  | 14.88  | 0.12  | 14.75  |
| <b>Jordan</b>     | West & Central Asia     | 0.695 | 295.39 | 13.45 | 281.94 | 100.48 | 1.30  | 99.18  |
| <b>Kazakhstan</b> | West & Central Asia     | 0.807 | 111.27 | 4.60  | 106.67 | 55.28  | 0.31  | 54.97  |
| <b>Kenya</b>      | Sub-Saharan Africa      | 0.472 | 67.96  | 53.14 | 14.82  | 34.27  | 17.23 | 17.04  |
| <b>Kiribati</b>   | Oceania                 | 0.478 | 0.00   | 5.25  | 0.00   | 0.00   | 0.85  | 0.00   |
| <b>Kuwait</b>     | West & Central Asia     | 0.862 | 158.85 | 3.98  | 154.87 | 58.61  | 0.27  | 58.34  |
| <b>Kyrgyzstan</b> | West & Central Asia     | 0.631 | 117.48 | 22.37 | 95.11  | 64.36  | 2.40  | 61.96  |
| <b>Laos</b>       | South & Southeast Asia  | 0.508 | 261.99 | 43.67 | 218.32 | 49.83  | 10.94 | 38.89  |
| <b>Latvia</b>     | Europe                  | 0.861 | 66.97  | 3.67  | 63.30  | 47.11  | 0.27  | 46.84  |
| <b>Lebanon</b>    | West & Central Asia     | 0.755 | 113.49 | 6.75  | 106.74 | 45.38  | 0.53  | 44.85  |
| <b>Lesotho</b>    | Sub-Saharan Africa      | 0.522 | 265.75 | 47.44 | 218.31 | 126.81 | 10.02 | 116.79 |
| <b>Liberia</b>    | Sub-Saharan Africa      | 0.283 | 54.40  | 52.54 | 1.86   | 26.86  | 25.75 | 1.11   |
| <b>Libya</b>      | North Africa            | 0.643 | 304.55 | 15.06 | 289.49 | 110.95 | 1.39  | 109.56 |
| <b>Lithuania</b>  | Europe                  | 0.837 | 52.62  | 3.79  | 48.83  | 35.49  | 0.34  | 35.15  |
| <b>Luxembourg</b> | Europe                  | 0.911 | 38.94  | 1.64  | 37.30  | 20.17  | 0.12  | 20.05  |
| <b>Macedonia</b>  | Europe                  | 0.762 | 119.39 | 4.17  | 115.22 | 69.67  | 0.27  | 69.40  |
| <b>Madagascar</b> | Sub-Saharan Africa      | 0.370 | 107.07 | 83.69 | 23.37  | 54.45  | 38.52 | 15.93  |



|                         |                                  |       |        |        |        |        |        |        |
|-------------------------|----------------------------------|-------|--------|--------|--------|--------|--------|--------|
| <b>Malawi</b>           | Sub-Saharan Africa               | 0.309 | 146.34 | 105.99 | 40.35  | 73.88  | 48.96  | 24.92  |
| <b>Malaysia</b>         | South & Southeast Asia           | 0.767 | 95.26  | 5.08   | 90.18  | 10.32  | 0.32   | 10.00  |
| <b>Maldives</b>         | South & Southeast Asia           | 0.623 | 237.75 | 25.14  | 212.60 | 28.75  | 2.42   | 26.33  |
| <b>Mali</b>             | Sub-Saharan Africa               | 0.231 | 225.22 | 198.87 | 26.35  | 116.72 | 101.45 | 15.27  |
| <b>Malta</b>            | Europe                           | 0.806 | 49.99  | 4.82   | 45.17  | 25.70  | 0.33   | 25.38  |
| <b>Marshall Islands</b> | Oceania                          | 0.592 | 199.34 | 41.81  | 157.53 | 34.19  | 5.89   | 28.31  |
| <b>Mauritania</b>       | Sub-Saharan Africa               | 0.401 | 216.06 | 87.44  | 128.62 | 109.51 | 39.38  | 70.13  |
| <b>Mauritius</b>        | Sub-Saharan Africa               | 0.735 | 315.62 | 8.43   | 307.19 | 35.60  | 0.47   | 35.13  |
| <b>Mexico</b>           | Mesoamerica (or Central America) | 0.718 | 455.29 | 8.25   | 447.04 | 218.43 | 0.70   | 217.73 |
| <b>Moldova</b>          | East Asia                        | 0.703 | 49.92  | 12.12  | 37.80  | 33.98  | 1.10   | 32.88  |
| <b>Mongolia</b>         | East Asia                        | 0.705 | 232.09 | 12.51  | 219.59 | 122.00 | 1.12   | 120.89 |
| <b>Montenegro</b>       | Europe                           | 0.799 | 114.41 | 4.67   | 109.74 | 54.08  | 0.30   | 53.78  |
| <b>Morocco</b>          | North Africa                     | 0.496 | 264.23 | 45.46  | 218.77 | 120.60 | 11.21  | 109.39 |
| <b>Mozambique</b>       | Sub-Saharan Africa               | 0.278 | 117.80 | 113.00 | 4.80   | 59.03  | 53.99  | 5.05   |
| <b>Myanmar</b>          | South & Southeast Asia           | 0.520 | 228.69 | 47.08  | 181.62 | 33.54  | 9.52   | 24.02  |
| <b>Namibia</b>          | Sub-Saharan Africa               | 0.617 | 161.94 | 41.24  | 120.69 | 75.52  | 6.97   | 68.55  |
| <b>Nepal</b>            | South & Southeast Asia           | 0.423 | 238.33 | 87.48  | 150.85 | 89.43  | 38.56  | 50.86  |
| <b>Netherlands</b>      | Europe                           | 0.894 | 29.64  | 1.50   | 28.14  | 15.80  | 0.11   | 15.70  |
| <b>New Zealand</b>      | Oceania                          | 0.884 | 5.98   | 1.50   | 4.47   | 1.64   | 0.10   | 1.54   |
| <b>Nicaragua</b>        | Mesoamerica (or Central America) | 0.563 | 486.52 | 43.63  | 442.89 | 246.19 | 8.38   | 237.81 |
| <b>Niger</b>            | Sub-Saharan Africa               | 0.147 | 231.08 | 235.99 | 0.00   | 120.56 | 124.29 | 0.00   |

|                                         |                                  |       |        |       |        |        |       |        |
|-----------------------------------------|----------------------------------|-------|--------|-------|--------|--------|-------|--------|
| <b>Nigeria</b>                          | Sub-Saharan Africa               | 0.474 | 117.66 | 62.18 | 55.48  | 58.08  | 18.17 | 39.91  |
| <b>North Korea</b>                      | East Asia                        | 0.565 | 153.80 | 42.37 | 111.43 | 31.95  | 7.70  | 24.24  |
| <b>Northern Mariana Islands</b>         | Oceania                          | 0.841 | 152.32 | 3.75  | 148.57 | 22.46  | 0.35  | 22.12  |
| <b>Norway</b>                           | Europe                           | 0.937 | 11.76  | 1.14  | 10.62  | 6.83   | 0.09  | 6.74   |
| <b>Oman</b>                             | West & Central Asia              | 0.730 | 184.57 | 8.46  | 176.11 | 68.64  | 0.66  | 67.98  |
| <b>Pakistan</b>                         | West & Central Asia              | 0.468 | 254.25 | 70.13 | 184.12 | 108.52 | 19.77 | 88.75  |
| <b>Palestine</b>                        | West & Central Asia              | 0.567 | 391.28 | 43.89 | 347.39 | 150.15 | 8.07  | 142.08 |
| <b>Panama</b>                           | Mesoamerica (or Central America) | 0.747 | 114.94 | 8.33  | 106.61 | 57.45  | 0.61  | 56.84  |
| <b>Papua New Guinea</b>                 | Oceania                          | 0.448 | 188.56 | 85.54 | 103.02 | 35.56  | 26.98 | 8.58   |
| <b>Paraguay</b>                         | South America                    | 0.644 | 171.06 | 15.11 | 155.95 | 84.08  | 1.44  | 82.64  |
| <b>Peru</b>                             | South America                    | 0.705 | 160.05 | 12.58 | 147.47 | 86.35  | 1.11  | 85.24  |
| <b>Philippines</b>                      | South & Southeast Asia           | 0.645 | 394.64 | 15.17 | 379.47 | 58.03  | 1.34  | 56.69  |
| <b>Poland</b>                           | Europe                           | 0.868 | 71.27  | 3.68  | 67.59  | 31.64  | 0.24  | 31.40  |
| <b>Portugal</b>                         | Europe                           | 0.752 | 26.99  | 5.72  | 21.27  | 10.69  | 0.44  | 10.24  |
| <b>Puerto Rico</b>                      | North & Central America          | 0.882 | 145.37 | 3.51  | 141.86 | 67.38  | 0.24  | 67.14  |
| <b>Qatar</b>                            | West & Central Asia              | 0.805 | 180.00 | 4.77  | 175.22 | 66.70  | 0.27  | 66.43  |
| <b>Romania</b>                          | Europe                           | 0.799 | 69.60  | 4.40  | 65.20  | 44.40  | 0.25  | 44.15  |
| <b>Russia</b>                           | East Asia                        | 0.856 | 51.29  | 3.13  | 48.16  | 36.80  | 0.20  | 36.61  |
| <b>Rwanda</b>                           | Sub-Saharan Africa               | 0.371 | 121.20 | 86.13 | 35.07  | 61.80  | 39.03 | 22.77  |
| <b>Saint Lucia</b>                      | North & Central America          | 0.741 | 126.62 | 8.57  | 118.05 | 65.96  | 0.64  | 65.32  |
| <b>Saint Vincent and the Grenadines</b> | North & Central America          | 0.747 | 155.22 | 6.95  | 148.26 | 80.30  | 0.47  | 79.83  |
| <b>Samoa</b>                            | Oceania                          | 0.637 | 0.00   | 3.62  | 0.00   | 0.00   | 0.28  | 0.00   |
| <b>Sao Tome and</b>                     | Sub-Saharan                      | 0.448 | 201.80 | 88.19 | 113.61 | 101.72 | 38.89 | 62.82  |

|                        |                        |       |        |        |        |        |       |        |
|------------------------|------------------------|-------|--------|--------|--------|--------|-------|--------|
| <b>Principe</b>        | Africa                 |       |        |        |        |        |       |        |
| <b>Saudi Arabia</b>    | West & Central Asia    | 0.759 | 291.08 | 4.78   | 286.30 | 98.26  | 0.28  | 97.98  |
| <b>Senegal</b>         | Sub-Saharan Africa     | 0.334 | 280.40 | 102.79 | 177.61 | 140.37 | 47.36 | 93.02  |
| <b>Serbia</b>          | Europe                 | 0.772 | 102.82 | 4.48   | 98.34  | 51.91  | 0.29  | 51.62  |
| <b>Seychelles</b>      | Sub-Saharan Africa     | 0.759 | 182.95 | 4.62   | 178.33 | 22.80  | 0.35  | 22.45  |
| <b>Sierra Leone</b>    | Sub-Saharan Africa     | 0.323 | 173.17 | 104.57 | 68.60  | 90.51  | 48.64 | 41.88  |
| <b>Singapore</b>       | South & Southeast Asia | 0.881 | 91.04  | 3.63   | 87.41  | 18.29  | 0.23  | 18.06  |
| <b>Slovakia</b>        | Europe                 | 0.862 | 75.35  | 3.57   | 71.79  | 31.91  | 0.26  | 31.65  |
| <b>Slovenia</b>        | Europe                 | 0.856 | 41.95  | 3.99   | 37.96  | 23.08  | 0.25  | 22.83  |
| <b>Solomon Islands</b> | Oceania                | 0.461 | 45.76  | 46.46  | 0.00   | 5.56   | 7.81  | 0.00   |
| <b>Somalia</b>         | Sub-Saharan Africa     | 0.151 | 148.16 | 152.80 | 0.00   | 74.94  | 77.75 | 0.00   |
| <b>South Africa</b>    | Sub-Saharan Africa     | 0.716 | 259.46 | 9.56   | 249.90 | 129.46 | 0.74  | 128.72 |
| <b>South Korea</b>     | East Asia              | 0.871 | 83.04  | 3.56   | 79.48  | 13.10  | 0.24  | 12.86  |
| <b>South Sudan</b>     | Sub-Saharan Africa     | 0.262 | 155.42 | 143.99 | 11.43  | 76.43  | 69.55 | 6.88   |
| <b>Spain</b>           | Europe                 | 0.819 | 22.12  | 3.70   | 18.42  | 11.46  | 0.31  | 11.15  |
| <b>Sri Lanka</b>       | South & Southeast Asia | 0.705 | 178.26 | 11.82  | 166.44 | 22.96  | 0.80  | 22.16  |
| <b>Sudan</b>           | Sub-Saharan Africa     | 0.428 | 311.20 | 87.18  | 224.02 | 131.93 | 38.53 | 93.40  |
| <b>Suriname</b>        | South America          | 0.704 | 223.20 | 12.16  | 211.04 | 113.99 | 1.15  | 112.84 |
| <b>Swaziland</b>       | Sub-Saharan Africa     | 0.623 | 224.89 | 24.67  | 200.22 | 106.71 | 3.16  | 103.55 |
| <b>Sweden</b>          | Europe                 | 0.892 | 5.52   | 1.40   | 4.12   | 3.04   | 0.12  | 2.92   |
| <b>Switzerland</b>     | Europe                 | 0.928 | 26.68  | 1.37   | 25.31  | 11.53  | 0.11  | 11.42  |
| <b>Syria</b>           | West & Central Asia    | 0.579 | 201.75 | 41.84  | 159.91 | 80.22  | 7.90  | 72.32  |
| <b>Tajikistan</b>      | West & Central Asia    | 0.574 | 163.73 | 39.30  | 124.43 | 92.48  | 7.41  | 85.07  |

|                             |                         |       |        |        |        |        |       |        |
|-----------------------------|-------------------------|-------|--------|--------|--------|--------|-------|--------|
| <b>Tanzania</b>             | Sub-Saharan Africa      | 0.411 | 143.21 | 86.63  | 56.57  | 71.52  | 38.73 | 32.79  |
| <b>Thailand</b>             | South & Southeast Asia  | 0.705 | 205.12 | 12.80  | 192.32 | 19.55  | 1.02  | 18.53  |
| <b>The Bahamas</b>          | North & Central America | 0.835 | 125.71 | 3.78   | 121.93 | 65.03  | 0.28  | 64.75  |
| <b>The Gambia</b>           | Sub-Saharan Africa      | 0.327 | 212.34 | 106.09 | 106.26 | 103.27 | 48.78 | 54.49  |
| <b>Timor-Leste</b>          | South & Southeast Asia  | 0.450 | 90.03  | 73.14  | 16.89  | 14.59  | 13.40 | 1.19   |
| <b>Togo</b>                 | Sub-Saharan Africa      | 0.362 | 220.62 | 105.78 | 114.84 | 113.01 | 48.13 | 64.88  |
| <b>Tonga</b>                | Oceania                 | 0.622 | 0.00   | 6.78   | 0.00   | 0.00   | 0.94  | 0.00   |
| <b>Trinidad and Tobago</b>  | North & Central America | 0.833 | 142.26 | 3.78   | 138.48 | 73.04  | 0.27  | 72.77  |
| <b>Tunisia</b>              | North Africa            | 0.652 | 230.95 | 15.33  | 215.62 | 98.96  | 1.31  | 97.65  |
| <b>Turkey</b>               | West & Central Asia     | 0.690 | 200.99 | 15.07  | 185.91 | 65.65  | 1.36  | 64.29  |
| <b>Turkmenistan</b>         | West & Central Asia     | 0.781 | 266.68 | 4.72   | 261.96 | 147.02 | 0.33  | 146.69 |
| <b>Uganda</b>               | Sub-Saharan Africa      | 0.377 | 156.82 | 87.84  | 68.98  | 79.22  | 39.45 | 39.77  |
| <b>Ukraine</b>              | East Asia               | 0.811 | 41.62  | 4.21   | 37.42  | 29.60  | 0.28  | 29.32  |
| <b>United Arab Emirates</b> | West & Central Asia     | 0.875 | 302.07 | 3.51   | 298.56 | 111.81 | 0.25  | 111.55 |
| <b>United Kingdom</b>       | Europe                  | 0.893 | 20.75  | 1.64   | 19.12  | 11.97  | 0.12  | 11.85  |
| <b>United States</b>        | North America           | 0.931 | 37.92  | 1.21   | 36.71  | 9.52   | 0.10  | 9.42   |
| <b>Uruguay</b>              | South America           | 0.745 | 48.80  | 6.96   | 41.84  | 19.73  | 0.54  | 19.19  |
| <b>Uzbekistan</b>           | West & Central Asia     | 0.699 | 201.97 | 14.47  | 187.50 | 112.81 | 1.15  | 111.65 |
| <b>Vanuatu</b>              | Oceania                 | 0.536 | 80.50  | 38.48  | 42.02  | 13.48  | 5.46  | 8.03   |
| <b>Venezuela</b>            | South America           | 0.728 | 269.20 | 8.85   | 260.34 | 130.43 | 0.55  | 129.87 |
| <b>Vietnam</b>              | South & Southeast Asia  | 0.628 | 171.04 | 23.48  | 147.56 | 22.06  | 2.38  | 19.68  |
| <b>Virgin Islands, U.S.</b> | North & Central America | 0.886 | 128.74 | 2.48   | 126.26 | 62.83  | 0.16  | 62.67  |

|                                                                        |                     |       |        |       |        |        |       |        |
|------------------------------------------------------------------------|---------------------|-------|--------|-------|--------|--------|-------|--------|
| <b>Yemen</b>                                                           | West & Central Asia | 0.408 | 327.43 | 88.39 | 239.04 | 129.35 | 40.08 | 89.27  |
| <b>Zambia</b>                                                          | Sub-Saharan Africa  | 0.467 | 181.28 | 69.00 | 112.28 | 93.25  | 20.79 | 72.46  |
| <b>Zimbabwe</b>                                                        | Sub-Saharan Africa  | 0.538 | 278.23 | 41.15 | 237.08 | 131.89 | 7.97  | 123.92 |
| <b>DALYs are age adjusted<br/>DALY, Disability adjusted life years</b> |                     |       |        |       |        |        |       |        |

**Supplemental Table 4:** Attributable burden of disease (ABD) and disability adjusted life years (DALY) using the World Health Organization recommended level of PM<sub>2.5</sub> as the theoretical minimum risk exposure level (TMREL), 10 ug/m<sup>3</sup>

| <b>Location</b>    | <b>ABD (in 1000s)</b>            | <b>ABD (per 100,000)</b> | <b>Age Standardized ABD (per 100,000)</b> | <b>DALY (in 1000s)</b>            | <b>DALY (per 100,000)</b> | <b>Age Standardized DALY (per 100,000)</b> |
|--------------------|----------------------------------|--------------------------|-------------------------------------------|-----------------------------------|---------------------------|--------------------------------------------|
| <b>Global</b>      | 5,005.39<br>(3,626.87, 6,397.35) | 67.91 (49.20, 86.79)     | 73.20 (53.22, 93.42)                      | 8,257.98<br>(6,012.93, 10,386.32) | 112.03 (81.57, 140.91)    | 118.28 (86.27, 148.54)                     |
| <b>Afghanistan</b> | 21.98 (15.96, 28.25)             | 67.40 (48.93, 86.65)     | 138.11 (99.80, 180.11)                    | 69.58 (45.30, 97.15)              | 213.40 (138.94, 297.93)   | 443.96 (293.57, 623.12)                    |
| <b>Albania</b>     | 0.97 (0.69, 1.27)                | 33.42 (23.74, 43.70)     | 27.22 (19.45, 35.35)                      | 1.60 (1.13, 2.09)                 | 55.15 (38.92, 72.17)      | 47.21 (33.37, 61.57)                       |

|                            |                       |                        |                         |                         |                         |                         |
|----------------------------|-----------------------|------------------------|-------------------------|-------------------------|-------------------------|-------------------------|
| <b>Algeria</b>             | 33.44 (24.06, 42.68)  | 84.36 (60.70, 107.69)  | 106.95 (77.07, 137.86)  | 51.11 (36.52, 66.58)    | 128.96 (92.13, 167.99)  | 169.14 (121.26, 219.48) |
| <b>American Samoa</b>      | 0.00 (0.00, 0.00)     | 0.00 (0.00, 0.00)      | 0.00 (0.00, 0.00)       | 0.00 (0.00, 0.00)       | 0.00 (0.00, 0.00)       | 0.00 (0.00, 0.00)       |
| <b>Andorra</b>             | 0.00 (0.00, 0.00)     | 0.00 (0.00, 0.00)      | 0.00 (0.00, 0.00)       | 0.00 (0.00, 0.00)       | 0.00 (0.00, 0.00)       | 0.00 (0.00, 0.00)       |
| <b>Angola</b>              | 13.40 (9.76, 17.23)   | 53.08 (38.63, 68.25)   | 120.74 (86.10, 155.91)  | 12.85 (8.85, 17.55)     | 50.88 (35.05, 69.51)    | 109.31 (74.01, 149.93)  |
| <b>Antigua and Barbuda</b> | 0.02 (0.01, 0.02)     | 18.25 (12.86, 23.96)   | 19.86 (13.92, 26.35)    | 0.04 (0.03, 0.05)       | 40.12 (28.25, 52.78)    | 41.98 (29.34, 54.91)    |
| <b>Argentina</b>           | 9.26 (6.50, 12.17)    | 21.34 (14.98, 28.04)   | 19.88 (13.97, 26.21)    | 15.01 (10.73, 19.32)    | 34.57 (24.71, 44.51)    | 32.39 (23.02, 41.95)    |
| <b>Armenia</b>             | 3.61 (2.56, 4.77)     | 120.03 (85.19, 158.46) | 102.64 (72.84, 133.45)  | 2.93 (2.11, 3.81)       | 97.44 (70.00, 126.56)   | 83.33 (59.56, 108.46)   |
| <b>Australia</b>           | 0.00 (0.00, 0.00)     | 0.00 (0.00, 0.00)      | 0.00 (0.00, 0.00)       | 0.00 (0.00, 0.00)       | 0.00 (0.00, 0.00)       | 0.00 (0.00, 0.00)       |
| <b>Austria</b>             | 4.85 (3.43, 6.31)     | 55.93 (39.60, 72.76)   | 31.54 (22.45, 41.10)    | 4.71 (3.40, 6.07)       | 54.29 (39.23, 70.02)    | 30.12 (21.69, 38.70)    |
| <b>Azerbaijan</b>          | 9.81 (6.97, 12.84)    | 100.33 (71.22, 131.27) | 116.91 (82.78, 152.33)  | 11.22 (8.02, 14.72)     | 114.68 (82.00, 150.53)  | 125.34 (89.22, 163.91)  |
| <b>Bahrain</b>             | 0.85 (0.61, 1.10)     | 62.24 (44.93, 80.26)   | 96.84 (69.69, 124.03)   | 1.26 (0.88, 1.69)       | 92.33 (64.18, 123.36)   | 168.77 (117.82, 225.26) |
| <b>Bangladesh</b>          | 98.37 (71.45, 125.09) | 61.12 (44.39, 77.72)   | 87.57 (62.83, 112.10)   | 158.40 (114.47, 204.64) | 98.41 (71.12, 127.14)   | 131.92 (94.99, 170.95)  |
| <b>Barbados</b>            | 0.10 (0.07, 0.13)     | 35.78 (25.28, 46.74)   | 26.04 (18.44, 33.95)    | 0.18 (0.13, 0.24)       | 64.56 (45.97, 83.78)    | 49.10 (34.89, 63.86)    |
| <b>Belarus</b>             | 7.57 (5.29, 9.98)     | 78.75 (55.08, 103.81)  | 55.79 (39.35, 73.08)    | 3.95 (2.74, 5.27)       | 41.05 (28.52, 54.86)    | 30.35 (21.12, 40.37)    |
| <b>Belgium</b>             | 4.37 (3.08, 5.73)     | 38.59 (27.21, 50.55)   | 22.33 (15.79, 29.14)    | 3.69 (2.63, 4.80)       | 32.59 (23.21, 42.36)    | 18.29 (13.00, 23.90)    |
| <b>Belize</b>              | 0.18 (0.13, 0.23)     | 50.23 (36.31, 63.77)   | 86.32 (62.21, 111.02)   | 0.57 (0.41, 0.75)       | 160.19 (114.86, 207.71) | 256.89 (184.83, 332.08) |
| <b>Benin</b>               | 9.38 (6.80, 12.07)    | 85.96 (62.33, 110.56)  | 159.79 (114.64, 207.00) | 11.67 (8.11, 15.70)     | 106.93 (74.32, 143.83)  | 183.62 (129.07, 243.93) |
| <b>Bermuda</b>             | 0.00 (0.00, 0.00)     | 0.00 (0.00, 0.00)      | 0.00 (0.00, 0.00)       | 0.00 (0.00, 0.00)       | 0.00 (0.00, 0.00)       | 0.00 (0.00, 0.00)       |
| <b>Bhutan</b>              | 0.46 (0.33, 0.58)     | 58.76 (42.60, 75.28)   | 84.66 (60.91, 109.00)   | 0.90 (0.61, 1.24)       | 116.56 (79.10, 159.41)  | 158.91 (108.55, 216.91) |
| <b>Bolivia</b>             | 5.67 (4.12, 7.28)     | 52.70 (38.23, 67.63)   | 74.72 (54.09, 96.00)    | 18.26 (12.50, 24.63)    | 169.63 (116.14, 228.76) | 227.62 (155.42, 310.03) |
| <b>Bosnia and</b>          | 2.50 (1.79, 3.21)     | 65.48 (47.09, 84.36)   | 44.13 (31.82, 56.54)    | 4.03 (2.91, 5.24)       | 105.76 (76.41, 135.11)  | 72.12 (51.59, 92.65)    |



|                                 |                         |                        |                         |                             |                        |                         |
|---------------------------------|-------------------------|------------------------|-------------------------|-----------------------------|------------------------|-------------------------|
| <b>Herzegovina</b>              |                         | 84.18)                 | 56.59)                  |                             | 137.56)                | 93.10)                  |
| <b>Botswana</b>                 | 1.06 (0.75, 1.39)       | 46.83 (33.14, 61.51)   | 73.00 (51.63, 96.64)    | 1.06 (0.62, 1.59)           | 47.03 (27.49, 70.30)   | 78.14 (47.97, 116.14)   |
| <b>Brazil</b>                   | 11.82 (8.27, 15.56)     | 5.69 (3.98, 7.49)      | 6.28 (4.38, 8.28)       | 21.40 (15.16, 27.64)        | 10.29 (7.29, 13.30)    | 11.12 (7.90, 14.42)     |
| <b>Brunei</b>                   | 0.00 (0.00, 0.00)       | 0.00 (0.00, 0.00)      | 0.00 (0.00, 0.00)       | 0.00 (0.00, 0.00)           | 0.00 (0.00, 0.00)      | 0.00 (0.00, 0.00)       |
| <b>Bulgaria</b>                 | 5.52 (3.95, 7.11)       | 75.88 (54.41, 97.79)   | 45.06 (32.67, 57.89)    | 8.81 (6.34, 11.43)          | 121.20 (87.24, 157.30) | 76.38 (54.70, 99.19)    |
| <b>Burkina Faso</b>             | 13.01 (9.43, 16.64)     | 71.90 (52.12, 91.96)   | 149.63 (107.38, 193.44) | 12.94 (9.24, 16.87)         | 71.52 (51.08, 93.26)   | 137.35 (98.15, 179.85)  |
| <b>Burundi</b>                  | 6.96 (5.07, 8.91)       | 61.85 (45.11, 79.18)   | 128.03 (91.78, 164.95)  | 6.30 (4.42, 8.37)           | 55.98 (39.28, 74.45)   | 107.48 (75.07, 142.14)  |
| <b>Cambodia</b>                 | 4.16 (3.02, 5.31)       | 26.71 (19.37, 34.06)   | 41.02 (29.77, 52.49)    | 14.80 (10.67, 18.98)        | 94.90 (68.44, 121.73)  | 139.82 (101.39, 178.67) |
| <b>Cameroon</b>                 | 17.44 (12.61, 22.31)    | 74.53 (53.88, 95.36)   | 143.07 (103.50, 184.81) | 27.04 (17.85, 37.94)        | 115.54 (76.27, 162.14) | 183.33 (120.38, 256.90) |
| <b>Canada</b>                   | 0.00 (0.00, 0.00)       | 0.00 (0.00, 0.00)      | 0.00 (0.00, 0.00)       | 0.00 (0.00, 0.00)           | 0.00 (0.00, 0.00)      | 0.00 (0.00, 0.00)       |
| <b>Cape Verde</b>               | 0.54 (0.39, 0.69)       | 103.50 (74.92, 132.79) | 154.92 (110.80, 201.01) | 0.56 (0.40, 0.73)           | 108.20 (77.18, 141.11) | 151.72 (108.17, 198.88) |
| <b>Central African Republic</b> | 3.44 (2.48, 4.42)       | 70.25 (50.63, 90.14)   | 123.73 (88.66, 158.84)  | 4.13 (2.89, 5.48)           | 84.31 (58.90, 111.85)  | 138.05 (96.19, 184.94)  |
| <b>Chad</b>                     | 10.41 (7.56, 13.38)     | 74.04 (53.75, 95.15)   | 158.85 (113.74, 206.67) | 16.20 (11.42, 21.47)        | 115.20 (81.18, 152.68) | 190.06 (135.31, 248.39) |
| <b>Chile</b>                    | 12.89 (9.25, 16.73)     | 71.84 (51.53, 93.21)   | 62.97 (45.14, 81.15)    | 18.32 (12.76, 24.56)        | 102.06 (71.09, 136.84) | 89.44 (62.04, 120.05)   |
| <b>China</b>                    | 553.88 (401.61, 707.76) | 40.04 (29.03, 51.16)   | 35.31 (25.78, 45.01)    | 1,191.53 (869.38, 1,507.32) | 86.13 (62.84, 108.95)  | 76.16 (55.70, 96.10)    |
| <b>Colombia</b>                 | 29.70 (21.14, 38.65)    | 61.53 (43.81, 80.07)   | 70.74 (50.04, 92.03)    | 31.86 (22.71, 41.22)        | 66.02 (47.05, 85.40)   | 77.50 (55.34, 99.33)    |
| <b>Comoros</b>                  | 0.28 (0.20, 0.36)       | 34.97 (24.71, 45.66)   | 64.26 (45.62, 84.21)    | 0.25 (0.16, 0.35)           | 31.08 (20.39, 44.11)   | 56.48 (36.58, 80.01)    |
| <b>Congo</b>                    | 3.23 (2.34, 4.13)       | 69.68 (50.48, 89.33)   | 127.16 (91.21, 164.60)  | 3.06 (2.13, 4.08)           | 66.13 (45.96, 88.08)   | 119.50 (82.10, 160.66)  |
| <b>Costa Rica</b>               | 4.60 (3.28, 5.97)       | 95.57 (68.20, 124.19)  | 95.69 (68.57, 124.55)   | 5.61 (4.08, 7.14)           | 116.74 (84.78, 148.57) | 116.74 (84.28, 149.09)  |
| <b>Cote d'Ivoire</b>            | 18.05 (12.96, 23.36)    | 79.57 (57.13, 102.95)  | 143.36 (102.49, 187.33) | 24.96 (17.20, 33.69)        | 110.03 (75.81, 148.48) | 181.06 (124.07, 243.27) |

|                                         |                       |                         |                         |                        |                         |                         |
|-----------------------------------------|-----------------------|-------------------------|-------------------------|------------------------|-------------------------|-------------------------|
| <b>Croatia</b>                          | 2.88 (2.06, 3.72)     | 68.01 (48.54, 87.70)    | 40.27 (28.97, 51.94)    | 3.51 (2.52, 4.53)      | 82.84 (59.40, 106.76)   | 48.45 (34.93, 62.01)    |
| <b>Cuba</b>                             | 4.78 (3.39, 6.18)     | 41.93 (29.79, 54.28)    | 30.59 (21.70, 39.78)    | 7.55 (5.40, 9.69)      | 66.31 (47.44, 85.09)    | 49.26 (35.37, 63.36)    |
| <b>Cyprus</b>                           | 0.46 (0.32, 0.60)     | 51.51 (36.41, 67.08)    | 38.19 (26.83, 49.92)    | 0.59 (0.43, 0.76)      | 66.36 (47.88, 85.46)    | 48.27 (34.82, 61.71)    |
| <b>Czech Republic</b>                   | 6.38 (4.58, 8.22)     | 59.64 (42.84, 76.82)    | 37.56 (27.33, 48.18)    | 6.86 (4.91, 8.92)      | 64.13 (45.94, 83.43)    | 40.94 (29.44, 53.31)    |
| <b>Democratic Republic of the Congo</b> | 42.90 (31.03, 54.95)  | 55.42 (40.09, 70.98)    | 115.51 (82.91, 149.82)  | 40.74 (29.19, 53.05)   | 52.62 (37.71, 68.52)    | 103.70 (73.69, 135.06)  |
| <b>Denmark</b>                          | 0.30 (0.21, 0.40)     | 5.30 (3.68, 7.08)       | 3.13 (2.19, 4.16)       | 0.25 (0.17, 0.33)      | 4.38 (3.06, 5.77)       | 2.70 (1.89, 3.59)       |
| <b>Djibouti</b>                         | 0.65 (0.47, 0.84)     | 73.08 (52.68, 94.07)    | 121.71 (87.79, 157.11)  | 0.63 (0.43, 0.86)      | 70.67 (48.37, 96.80)    | 114.87 (78.22, 155.63)  |
| <b>Dominica</b>                         | 0.01 (0.01, 0.02)     | 19.08 (13.42, 25.10)    | 19.59 (13.87, 25.78)    | 0.04 (0.03, 0.05)      | 54.29 (38.24, 71.34)    | 55.30 (38.67, 72.77)    |
| <b>Dominican Republic</b>               | 3.94 (2.84, 5.07)     | 37.41 (26.97, 48.16)    | 47.21 (33.77, 60.99)    | 7.83 (5.53, 10.24)     | 74.37 (52.48, 97.27)    | 90.19 (63.68, 118.24)   |
| <b>Ecuador</b>                          | 2.21 (1.55, 2.89)     | 13.66 (9.60, 17.90)     | 17.66 (12.41, 23.19)    | 5.95 (4.24, 7.71)      | 36.80 (26.26, 47.70)    | 46.03 (32.60, 59.49)    |
| <b>Egypt</b>                            | 83.34 (60.45, 106.96) | 91.43 (66.32, 117.35)   | 124.26 (89.93, 159.34)  | 124.12 (84.50, 168.87) | 136.18 (92.71, 185.27)  | 197.49 (132.77, 271.08) |
| <b>El Salvador</b>                      | 9.16 (6.68, 11.57)    | 149.33 (108.87, 188.55) | 175.31 (128.04, 221.56) | 21.25 (15.13, 27.55)   | 346.20 (246.49, 448.96) | 391.27 (280.15, 508.00) |
| <b>Equatorial Guinea</b>                | 0.63 (0.45, 0.82)     | 74.89 (53.52, 97.57)    | 121.56 (87.18, 157.49)  | 0.46 (0.29, 0.66)      | 53.85 (33.80, 77.55)    | 91.96 (58.70, 132.26)   |
| <b>Eritrea</b>                          | 3.20 (2.32, 4.10)     | 60.96 (44.19, 78.16)    | 125.53 (90.04, 162.49)  | 2.97 (2.04, 4.02)      | 56.73 (38.83, 76.59)    | 112.89 (78.78, 150.20)  |
| <b>Estonia</b>                          | 0.00 (0.00, 0.00)     | 0.00 (0.00, 0.00)       | 0.00 (0.00, 0.00)       | 0.00 (0.00, 0.00)      | 0.00 (0.00, 0.00)       | 0.00 (0.00, 0.00)       |
| <b>Ethiopia</b>                         | 65.83 (47.76, 84.63)  | 66.20 (48.03, 85.11)    | 126.18 (90.75, 163.63)  | 67.95 (48.21, 89.90)   | 68.34 (48.49, 90.41)    | 128.06 (90.83, 168.68)  |
| <b>Federated States of Micronesia</b>   | 0.00 (0.00, 0.00)     | 0.00 (0.00, 0.00)       | 0.00 (0.00, 0.00)       | 0.00 (0.00, 0.00)      | 0.00 (0.00, 0.00)       | 0.00 (0.00, 0.00)       |
| <b>Fiji</b>                             | 0.00 (0.00, 0.00)     | 0.00 (0.00, 0.00)       | 0.00 (0.00, 0.00)       | 0.00 (0.00, 0.00)      | 0.00 (0.00, 0.00)       | 0.00 (0.00, 0.00)       |
| <b>Finland</b>                          | 0.00 (0.00, 0.00)     | 0.00 (0.00, 0.00)       | 0.00 (0.00, 0.00)       | 0.00 (0.00, 0.00)      | 0.00 (0.00, 0.00)       | 0.00 (0.00, 0.00)       |
| <b>France</b>                           | 9.44 (6.60, 12.52)    | 14.47 (10.12, 19.19)    | 8.07 (5.64, 10.60)      | 7.35 (5.18, 9.65)      | 11.27 (7.94, 14.80)     | 6.26 (4.37, 8.27)       |

|                      |                           |                        |                         |                               |                         |                         |
|----------------------|---------------------------|------------------------|-------------------------|-------------------------------|-------------------------|-------------------------|
| <b>Gabon</b>         | 1.31 (0.95, 1.69)         | 75.97 (54.98, 97.76)   | 121.15 (87.25, 156.37)  | 1.34 (0.91, 1.84)             | 77.89 (52.50, 106.50)   | 121.85 (82.86, 165.77)  |
| <b>Georgia</b>       | 4.47 (3.19, 5.81)         | 111.52 (79.78, 145.01) | 88.20 (62.89, 114.83)   | 5.36 (3.85, 6.89)             | 133.91 (96.19, 172.09)  | 108.65 (78.21, 140.28)  |
| <b>Germany</b>       | 29.62 (20.61, 39.24)      | 35.42 (24.65, 46.92)   | 17.56 (12.38, 23.06)    | 28.42 (20.14, 37.19)          | 33.99 (24.08, 44.48)    | 16.49 (11.71, 21.42)    |
| <b>Ghana</b>         | 25.51 (18.34, 32.82)      | 93.05 (66.91, 119.69)  | 156.61 (112.61, 203.64) | 27.39 (19.59, 36.02)          | 99.90 (71.46, 131.36)   | 157.89 (112.67, 207.44) |
| <b>Greece</b>        | 3.11 (2.18, 4.13)         | 28.48 (19.96, 37.84)   | 14.59 (10.28, 19.15)    | 3.51 (2.50, 4.57)             | 32.17 (22.86, 41.82)    | 16.17 (11.63, 21.05)    |
| <b>Greenland</b>     | 0.00 (0.00, 0.00)         | 0.00 (0.00, 0.00)      | 0.00 (0.00, 0.00)       | 0.00 (0.00, 0.00)             | 0.00 (0.00, 0.00)       | 0.00 (0.00, 0.00)       |
| <b>Grenada</b>       | 0.03 (0.02, 0.04)         | 25.49 (17.93, 33.25)   | 30.60 (21.67, 40.21)    | 0.09 (0.06, 0.11)             | 80.37 (56.68, 105.81)   | 92.92 (65.67, 121.98)   |
| <b>Guam</b>          | 0.00 (0.00, 0.00)         | 0.00 (0.00, 0.00)      | 0.00 (0.00, 0.00)       | 0.00 (0.00, 0.00)             | 0.00 (0.00, 0.00)       | 0.00 (0.00, 0.00)       |
| <b>Guatemala</b>     | 14.19 (10.27, 18.18)      | 86.74 (62.81, 111.17)  | 151.50 (109.29, 195.59) | 30.82 (21.13, 41.65)          | 188.47 (129.22, 254.64) | 293.76 (201.78, 397.48) |
| <b>Guinea</b>        | 9.01 (6.42, 11.67)        | 71.68 (51.10, 92.78)   | 128.63 (90.70, 167.52)  | 10.01 (6.95, 13.46)           | 79.64 (55.23, 107.06)   | 131.47 (90.77, 176.10)  |
| <b>Guinea-Bissau</b> | 1.96 (1.41, 2.53)         | 106.12 (76.38, 136.74) | 182.42 (132.07, 236.39) | 2.90 (2.04, 3.85)             | 156.81 (110.21, 208.47) | 251.12 (177.70, 334.40) |
| <b>Guyana</b>        | 0.20 (0.14, 0.27)         | 26.36 (18.68, 34.60)   | 33.86 (24.13, 44.31)    | 0.60 (0.42, 0.78)             | 77.31 (55.14, 101.13)   | 94.06 (66.81, 122.08)   |
| <b>Haiti</b>         | 5.35 (3.85, 6.80)         | 49.87 (35.93, 63.45)   | 81.26 (58.71, 104.11)   | 18.01 (11.79, 25.27)          | 167.94 (109.94, 235.67) | 242.70 (158.09, 335.78) |
| <b>Honduras</b>      | 7.05 (5.07, 9.13)         | 87.06 (62.61, 112.78)  | 144.71 (103.71, 188.55) | 15.72 (10.16, 22.23)          | 194.17 (125.47, 274.60) | 309.35 (199.62, 431.69) |
| <b>Hungary</b>       | 7.19 (5.18, 9.27)         | 70.71 (50.99, 91.17)   | 43.77 (31.75, 56.07)    | 8.48 (6.16, 10.87)            | 83.42 (60.59, 106.92)   | 52.83 (38.17, 67.50)    |
| <b>Iceland</b>       | 0.00 (0.00, 0.00)         | 0.00 (0.00, 0.00)      | 0.00 (0.00, 0.00)       | 0.00 (0.00, 0.00)             | 0.00 (0.00, 0.00)       | 0.00 (0.00, 0.00)       |
| <b>India</b>         | 786.55 (568.75, 1,006.63) | 59.97 (43.36, 76.75)   | 77.91 (56.46, 99.99)    | 1,801.84 (1,309.50, 2,298.82) | 137.37 (99.84, 175.26)  | 171.90 (125.02, 217.84) |
| <b>Indonesia</b>     | 38.10 (26.91, 49.38)      | 14.79 (10.45, 19.17)   | 18.54 (13.14, 23.97)    | 131.65 (94.36, 168.66)        | 51.10 (36.63, 65.47)    | 60.56 (43.44, 77.50)    |
| <b>Iran</b>          | 65.60 (47.37, 84.25)      | 83.01 (59.94, 106.60)  | 107.31 (77.53, 138.37)  | 75.07 (53.25, 98.71)          | 94.98 (67.37, 124.89)   | 127.28 (90.41, 167.32)  |
| <b>Iraq</b>          | 25.02 (18.15, 32.10)      | 68.69 (49.84, 88.14)   | 135.49 (97.84, 174.11)  | 54.04 (36.71, 74.16)          | 148.38 (100.80, 203.61) | 302.27 (208.95, 407.86) |

|                   |                      |                        |                        |                      |                         |                         |
|-------------------|----------------------|------------------------|------------------------|----------------------|-------------------------|-------------------------|
| <b>Ireland</b>    | 0.00 (0.00, 0.00)    | 0.00 (0.00, 0.00)      | 0.00 (0.00, 0.00)      | 0.00 (0.00, 0.00)    | 0.00 (0.00, 0.00)       | 0.00 (0.00, 0.00)       |
| <b>Israel</b>     | 5.39 (3.86, 6.92)    | 66.96 (48.01, 85.94)   | 60.56 (43.99, 78.24)   | 7.77 (5.56, 10.12)   | 96.58 (69.04, 125.79)   | 85.70 (60.78, 112.41)   |
| <b>Italy</b>      | 48.18 (34.38, 62.54) | 76.73 (54.75, 99.59)   | 37.35 (26.87, 48.50)   | 42.12 (30.31, 54.13) | 67.07 (48.27, 86.20)    | 32.10 (23.13, 41.26)    |
| <b>Jamaica</b>    | 1.15 (0.82, 1.49)    | 40.59 (28.99, 52.60)   | 42.96 (30.55, 56.17)   | 2.81 (1.84, 3.93)    | 99.18 (65.01, 138.75)   | 103.55 (68.49, 144.47)  |
| <b>Japan</b>      | 50.38 (35.22, 66.88) | 39.26 (27.45, 52.12)   | 16.75 (11.79, 21.90)   | 48.57 (34.25, 63.35) | 37.85 (26.69, 49.37)    | 16.88 (11.94, 22.17)    |
| <b>Jordan</b>     | 5.00 (3.65, 6.43)    | 66.07 (48.16, 84.91)   | 113.96 (81.78, 147.50) | 8.90 (6.09, 12.15)   | 117.52 (80.39, 160.47)  | 212.61 (146.56, 288.57) |
| <b>Kazakhstan</b> | 11.04 (7.85, 14.44)  | 62.98 (44.78, 82.36)   | 73.34 (52.15, 96.31)   | 10.16 (7.12, 13.50)  | 57.96 (40.60, 76.99)    | 65.03 (45.58, 86.68)    |
| <b>Kenya</b>      | 12.04 (8.51, 15.61)  | 26.06 (18.42, 33.80)   | 52.29 (36.88, 68.52)   | 8.57 (5.98, 11.45)   | 18.56 (12.95, 24.78)    | 35.82 (24.74, 48.42)    |
| <b>Kiribati</b>   | 0.00 (0.00, 0.00)    | 0.00 (0.00, 0.00)      | 0.00 (0.00, 0.00)      | 0.00 (0.00, 0.00)    | 0.00 (0.00, 0.00)       | 0.00 (0.00, 0.00)       |
| <b>Kuwait</b>     | 2.16 (1.54, 2.77)    | 55.27 (39.61, 71.00)   | 92.57 (67.03, 119.14)  | 2.26 (1.56, 3.02)    | 57.88 (40.11, 77.39)    | 114.27 (79.77, 152.45)  |
| <b>Kyrgyzstan</b> | 2.30 (1.63, 3.02)    | 38.97 (27.61, 51.20)   | 56.95 (39.97, 74.65)   | 3.05 (2.17, 3.95)    | 51.78 (36.88, 67.08)    | 64.33 (46.01, 83.27)    |
| <b>Laos</b>       | 1.87 (1.36, 2.38)    | 27.48 (19.97, 34.94)   | 46.84 (33.91, 59.47)   | 8.64 (6.14, 11.33)   | 127.05 (90.36, 166.61)  | 188.65 (136.73, 243.39) |
| <b>Latvia</b>     | 2.82 (2.00, 3.69)    | 127.37 (90.52, 166.94) | 76.37 (54.21, 99.86)   | 1.59 (1.13, 2.10)    | 72.01 (51.09, 95.01)    | 44.92 (31.99, 58.53)    |
| <b>Lebanon</b>    | 4.35 (3.14, 5.57)    | 75.56 (54.56, 96.66)   | 80.84 (58.27, 104.12)  | 4.34 (3.10, 5.66)    | 75.29 (53.74, 98.22)    | 81.72 (58.13, 106.46)   |
| <b>Lesotho</b>    | 1.52 (1.08, 1.97)    | 71.32 (50.71, 92.39)   | 124.48 (88.50, 163.40) | 2.02 (1.35, 2.79)    | 94.71 (63.63, 131.22)   | 168.86 (114.18, 232.64) |
| <b>Liberia</b>    | 0.00 (0.00, 0.00)    | 0.00 (0.00, 0.00)      | 0.00 (0.00, 0.00)      | 0.00 (0.00, 0.00)    | 0.00 (0.00, 0.00)       | 0.00 (0.00, 0.00)       |
| <b>Libya</b>      | 4.97 (3.60, 6.36)    | 78.96 (57.12, 101.11)  | 107.90 (77.77, 138.57) | 9.35 (6.51, 12.51)   | 148.56 (103.41, 198.70) | 219.10 (154.40, 293.34) |
| <b>Lithuania</b>  | 3.17 (2.25, 4.16)    | 100.50 (71.27, 131.87) | 61.75 (44.36, 80.35)   | 1.67 (1.17, 2.23)    | 53.11 (37.22, 70.70)    | 33.53 (23.72, 43.97)    |
| <b>Luxembourg</b> | 0.20 (0.14, 0.27)    | 36.48 (25.60, 47.68)   | 25.89 (18.32, 33.77)   | 0.17 (0.12, 0.22)    | 31.13 (22.16, 40.37)    | 21.52 (15.28, 28.16)    |
| <b>Macedonia</b>  | 1.15 (0.82, 1.47)    | 55.16 (39.59, 70.95)   | 43.45 (31.41, 55.52)   | 2.25 (1.63, 2.88)    | 108.28 (78.60, 138.39)  | 86.14 (62.08, 109.72)   |
| <b>Madagascar</b> | 10.33 (7.37, 13.29)  | 42.71 (30.47, 54.95)   | 82.75 (58.53, 106.97)  | 9.17 (6.33, 12.01)   | 37.91 (26.16, 50.66)    | 68.59 (47.60, 89.58)    |

|                         |                        |                        |                         |                         |                         |                         |
|-------------------------|------------------------|------------------------|-------------------------|-------------------------|-------------------------|-------------------------|
|                         | 13.37)                 | 55.26)                 | 108.21)                 | 12.41)                  | 51.30)                  | 92.21)                  |
| <b>Malawi</b>           | 8.78 (6.36, 11.29)     | 51.01 (36.95, 65.57)   | 109.83 (79.39, 142.95)  | 9.17 (6.36, 12.27)      | 53.26 (36.96, 71.30)    | 103.32 (72.48, 137.05)  |
| <b>Malaysia</b>         | 4.70 (3.35, 6.11)      | 15.51 (11.04, 20.18)   | 19.16 (13.48, 25.04)    | 11.27 (7.98, 14.63)     | 37.21 (26.33, 48.30)    | 47.69 (33.89, 61.68)    |
| <b>Maldives</b>         | 0.12 (0.08, 0.15)      | 32.02 (23.23, 40.83)   | 46.86 (34.02, 59.57)    | 0.41 (0.28, 0.56)       | 112.83 (77.79, 153.36)  | 171.15 (118.28, 230.15) |
| <b>Mali</b>             | 12.89 (9.34, 16.49)    | 73.36 (53.18, 93.87)   | 154.93 (111.18, 200.53) | 16.38 (11.46, 21.95)    | 93.23 (65.24, 124.95)   | 162.02 (113.44, 216.44) |
| <b>Malta</b>            | 0.18 (0.13, 0.24)      | 43.10 (30.52, 56.82)   | 24.96 (17.55, 32.76)    | 0.17 (0.12, 0.23)       | 41.64 (29.26, 55.28)    | 25.80 (17.98, 34.14)    |
| <b>Marshall Islands</b> | 0.00 (0.00, 0.00)      | 0.00 (0.00, 0.00)      | 0.00 (0.00, 0.00)       | 0.00 (0.00, 0.00)       | 0.00 (0.00, 0.00)       | 0.00 (0.00, 0.00)       |
| <b>Mauritania</b>       | 3.88 (2.79, 4.97)      | 94.91 (68.35, 121.77)  | 159.22 (114.17, 206.63) | 3.82 (2.63, 5.17)       | 93.62 (64.47, 126.47)   | 155.47 (107.46, 210.16) |
| <b>Mauritius</b>        | 0.44 (0.31, 0.57)      | 34.29 (24.08, 44.80)   | 29.81 (21.18, 38.80)    | 2.11 (1.49, 2.78)       | 165.84 (116.67, 218.42) | 145.74 (102.55, 193.09) |
| <b>Mexico</b>           | 137.61 (98.68, 177.83) | 108.32 (77.68, 139.97) | 137.61 (98.41, 178.80)  | 311.56 (227.46, 390.77) | 245.24 (179.04, 307.59) | 304.03 (221.95, 382.61) |
| <b>Moldova</b>          | 2.28 (1.60, 3.01)      | 56.13 (39.41, 74.09)   | 46.86 (33.49, 61.85)    | 1.35 (0.94, 1.78)       | 33.20 (23.16, 43.73)    | 28.60 (19.85, 38.17)    |
| <b>Mongolia</b>         | 2.54 (1.83, 3.29)      | 86.13 (61.84, 111.34)  | 131.02 (93.69, 170.41)  | 3.88 (2.19, 5.85)       | 131.22 (74.00, 198.03)  | 167.71 (103.81, 242.85) |
| <b>Montenegro</b>       | 0.41 (0.30, 0.53)      | 65.58 (47.33, 85.01)   | 49.22 (35.54, 63.15)    | 0.67 (0.49, 0.86)       | 107.57 (77.94, 138.06)  | 82.39 (59.82, 105.73)   |
| <b>Morocco</b>          | 20.70 (15.05, 26.64)   | 60.22 (43.80, 77.49)   | 69.93 (50.31, 89.65)    | 54.19 (37.34, 73.07)    | 157.65 (108.63, 212.57) | 190.76 (131.21, 259.15) |
| <b>Mozambique</b>       | 10.63 (7.60, 13.83)    | 37.98 (27.16, 49.42)   | 76.22 (53.75, 99.50)    | 10.55 (6.83, 15.07)     | 37.71 (24.40, 53.83)    | 68.74 (44.97, 97.91)    |
| <b>Myanmar</b>          | 20.52 (14.77, 26.34)   | 37.99 (27.34, 48.75)   | 47.49 (34.25, 60.68)    | 72.10 (51.34, 94.80)    | 133.45 (95.03, 175.48)  | 164.59 (118.35, 214.89) |
| <b>Namibia</b>          | 1.34 (0.96, 1.74)      | 54.66 (39.03, 70.75)   | 94.50 (67.32, 123.60)   | 1.39 (0.91, 1.94)       | 56.77 (37.20, 79.14)    | 103.18 (67.97, 143.38)  |
| <b>Nepal</b>            | 23.84 (17.27, 30.59)   | 83.50 (60.48, 107.15)  | 117.84 (84.33, 151.74)  | 34.01 (23.35, 45.63)    | 119.11 (81.80, 159.80)  | 172.09 (120.09, 228.43) |
| <b>Netherlands</b>      | 4.44 (3.12, 5.86)      | 25.83 (18.12, 34.11)   | 15.41 (10.85, 20.24)    | 3.84 (2.72, 5.01)       | 22.33 (15.83, 29.12)    | 13.49 (9.58, 17.64)     |
| <b>New Zealand</b>      | 0.00 (0.00, 0.00)      | 0.00 (0.00, 0.00)      | 0.00 (0.00, 0.00)       | 0.00 (0.00, 0.00)       | 0.00 (0.00, 0.00)       | 0.00 (0.00, 0.00)       |
| <b>Nicaragua</b>        | 6.33 (4.58, 8.19)      | 103.91 (75.25, 153.27) | 153.27 (110.22, 206.63) | 15.77 (11.07, 20.24)    | 259.01 (181.79, 336.23) | 350.66 (246.24, 455.08) |

|                                 |                         |                      |                         |                         |                         |                         |
|---------------------------------|-------------------------|----------------------|-------------------------|-------------------------|-------------------------|-------------------------|
|                                 |                         | 134.55)              | 197.22)                 | 20.94)                  | 344.00)                 | 461.78)                 |
| <b>Niger</b>                    | 15.10 (10.88, 19.41)    | 76.04 (54.79, 97.75) | 155.10 (112.04, 201.47) | 18.99 (12.68, 26.34)    | 95.67 (63.84, 132.66)   | 165.85 (113.37, 227.06) |
| <b>Nigeria</b>                  | 140.66 (101.70, 180.23) | 77.08 (55.73, 98.76) | 144.52 (103.59, 187.08) | 85.68 (59.86, 115.45)   | 46.95 (32.80, 63.26)    | 84.71 (58.31, 114.01)   |
| <b>North Korea</b>              | 10.91 (7.86, 14.14)     | 43.38 (31.24, 56.20) | 44.22 (32.10, 56.62)    | 27.94 (20.06, 36.08)    | 111.07 (79.75, 143.39)  | 110.68 (79.45, 144.03)  |
| <b>Northern Mariana Islands</b> | 0.00 (0.00, 0.01)       | 4.06 (2.84, 5.36)    | 9.45 (6.67, 12.47)      | 0.02 (0.01, 0.02)       | 13.91 (9.36, 19.18)     | 30.01 (20.76, 40.37)    |
| <b>Norway</b>                   | 0.00 (0.00, 0.00)       | 0.00 (0.00, 0.00)    | 0.00 (0.00, 0.00)       | 0.00 (0.00, 0.00)       | 0.00 (0.00, 0.00)       | 0.00 (0.00, 0.00)       |
| <b>Oman</b>                     | 2.41 (1.75, 3.08)       | 53.87 (39.12, 68.73) | 94.72 (68.30, 122.31)   | 3.11 (2.22, 4.05)       | 69.45 (49.56, 90.32)    | 133.13 (95.31, 171.44)  |
| <b>Pakistan</b>                 | 77.51 (56.63, 98.27)    | 41.00 (29.95, 51.98) | 64.30 (46.68, 82.05)    | 246.12 (153.64, 353.37) | 130.18 (81.26, 186.91)  | 182.73 (113.75, 263.58) |
| <b>Palestine</b>                | 2.59 (1.87, 3.32)       | 55.46 (40.08, 71.09) | 112.01 (80.08, 144.76)  | 5.58 (4.03, 7.13)       | 119.35 (86.24, 152.53)  | 264.79 (192.26, 339.14) |
| <b>Panama</b>                   | 0.96 (0.67, 1.28)       | 24.48 (17.14, 32.48) | 28.53 (19.86, 37.87)    | 1.33 (0.94, 1.75)       | 33.98 (23.99, 44.65)    | 38.22 (26.76, 50.29)    |
| <b>Papua New Guinea</b>         | 0.13 (0.09, 0.17)       | 1.69 (1.19, 2.23)    | 3.03 (2.11, 4.00)       | 0.60 (0.36, 0.89)       | 7.82 (4.72, 11.70)      | 13.11 (8.02, 19.50)     |
| <b>Paraguay</b>                 | 1.33 (0.94, 1.73)       | 19.95 (14.11, 26.01) | 27.91 (19.62, 36.66)    | 3.80 (2.69, 4.98)       | 57.05 (40.38, 74.85)    | 77.87 (55.16, 101.70)   |
| <b>Peru</b>                     | 13.94 (10.11, 17.78)    | 44.40 (32.21, 56.62) | 57.34 (41.46, 73.89)    | 29.10 (20.36, 38.58)    | 92.68 (64.86, 122.89)   | 115.33 (80.52, 152.93)  |
| <b>Philippines</b>              | 38.96 (28.35, 49.52)    | 38.65 (28.12, 49.12) | 53.88 (38.80, 68.32)    | 207.35 (148.93, 267.93) | 205.70 (147.75, 265.80) | 284.53 (205.31, 366.11) |
| <b>Poland</b>                   | 29.14 (20.79, 37.60)    | 74.90 (53.42, 96.62) | 50.77 (36.67, 65.26)    | 29.47 (21.27, 37.75)    | 75.73 (54.66, 97.00)    | 51.37 (37.25, 66.05)    |
| <b>Portugal</b>                 | 0.00 (0.00, 0.00)       | 0.00 (0.00, 0.00)    | 0.00 (0.00, 0.00)       | 0.00 (0.00, 0.00)       | 0.00 (0.00, 0.00)       | 0.00 (0.00, 0.00)       |
| <b>Puerto Rico</b>              | 2.14 (1.52, 2.79)       | 58.02 (41.36, 75.61) | 43.71 (31.05, 56.69)    | 4.03 (2.90, 5.19)       | 109.42 (78.65, 140.83)  | 83.18 (59.51, 107.10)   |
| <b>Qatar</b>                    | 1.05 (0.76, 1.35)       | 47.36 (34.13, 60.94) | 92.76 (66.44, 119.08)   | 1.25 (0.84, 1.70)       | 56.17 (37.79, 76.58)    | 129.54 (86.48, 179.64)  |
| <b>Romania</b>                  | 10.38 (7.47, 13.32)     | 53.14 (38.23, 68.24) | 34.01 (24.55, 43.74)    | 13.72 (9.93, 17.66)     | 70.27 (50.87, 90.43)    | 45.55 (32.81, 58.52)    |
| <b>Russia</b>                   | 91.33 (64.40, 119.39)   | 61.66 (43.48, 80.61) | 44.39 (31.27, 58.14)    | 53.41 (35.80, 73.06)    | 36.06 (24.17, 49.33)    | 27.36 (18.33, 37.88)    |
| <b>Rwanda</b>                   | 6.27 (4.53, 8.07)       | 53.89 (38.92, 68.86) | 109.18 (78.76, 139.60)  | 5.29 (3.56, 7.31)       | 45.47 (30.60, 60.34)    | 87.10 (58.68, 115.52)   |



|                                         |                      |                        |                         |                      |                         |                         |
|-----------------------------------------|----------------------|------------------------|-------------------------|----------------------|-------------------------|-------------------------|
|                                         |                      | 69.35)                 | 140.88)                 |                      | 62.83)                  | 121.25)                 |
| <b>Saint Lucia</b>                      | 0.04 (0.03, 0.05)    | 21.49 (15.19, 28.00)   | 21.57 (15.15, 28.46)    | 0.09 (0.06, 0.12)    | 48.42 (34.63, 62.48)    | 47.38 (33.62, 61.13)    |
| <b>Saint Vincent and the Grenadines</b> | 0.02 (0.02, 0.03)    | 20.66 (14.57, 27.12)   | 22.97 (16.13, 30.12)    | 0.06 (0.04, 0.08)    | 55.11 (39.35, 71.07)    | 59.25 (41.87, 76.15)    |
| <b>Samoa</b>                            | 0.00 (0.00, 0.00)    | 0.00 (0.00, 0.00)      | 0.00 (0.00, 0.00)       | 0.00 (0.00, 0.00)    | 0.00 (0.00, 0.00)       | 0.00 (0.00, 0.00)       |
| <b>Sao Tome and Principe</b>            | 0.05 (0.04, 0.07)    | 26.60 (18.89, 34.87)   | 50.12 (35.12, 66.25)    | 0.07 (0.05, 0.10)    | 38.84 (25.99, 53.11)    | 67.04 (46.10, 90.33)    |
| <b>Saudi Arabia</b>                     | 22.09 (15.99, 28.43) | 70.27 (50.87, 90.43)   | 108.54 (78.59, 139.62)  | 34.11 (24.78, 43.85) | 108.52 (78.82, 139.49)  | 209.54 (151.98, 266.42) |
| <b>Senegal</b>                          | 13.18 (9.55, 16.84)  | 87.26 (63.22, 111.46)  | 166.93 (120.36, 217.81) | 17.26 (12.44, 22.29) | 114.26 (82.33, 147.51)  | 201.83 (145.14, 260.94) |
| <b>Serbia</b>                           | 4.81 (3.45, 6.24)    | 54.29 (38.97, 70.48)   | 35.27 (25.45, 45.43)    | 9.68 (6.97, 12.39)   | 109.25 (78.66, 139.85)  | 71.38 (51.90, 90.78)    |
| <b>Seychelles</b>                       | 0.01 (0.01, 0.01)    | 11.12 (7.97, 14.61)    | 11.66 (8.24, 15.24)     | 0.06 (0.04, 0.08)    | 59.67 (41.69, 79.71)    | 62.47 (43.54, 82.95)    |
| <b>Sierra Leone</b>                     | 2.58 (1.83, 3.40)    | 39.98 (28.37, 52.56)   | 74.47 (52.46, 97.62)    | 3.38 (2.30, 4.63)    | 52.37 (35.60, 71.61)    | 85.72 (58.82, 115.97)   |
| <b>Singapore</b>                        | 1.80 (1.28, 2.34)    | 45.85 (32.63, 59.56)   | 36.70 (26.06, 47.70)    | 2.69 (1.89, 3.58)    | 68.68 (48.27, 91.14)    | 55.46 (38.80, 73.16)    |
| <b>Slovakia</b>                         | 2.94 (2.12, 3.82)    | 52.97 (38.07, 68.79)   | 38.25 (27.64, 49.43)    | 3.89 (2.80, 5.05)    | 70.00 (50.40, 90.88)    | 51.09 (36.21, 66.20)    |
| <b>Slovenia</b>                         | 1.06 (0.76, 1.37)    | 51.45 (36.91, 66.55)   | 30.77 (22.06, 39.69)    | 1.01 (0.72, 1.32)    | 48.94 (34.96, 63.93)    | 28.16 (19.93, 36.75)    |
| <b>Solomon Islands</b>                  | 0.00 (0.00, 0.00)    | 0.00 (0.00, 0.00)      | 0.00 (0.00, 0.00)       | 0.00 (0.00, 0.00)    | 0.00 (0.00, 0.00)       | 0.00 (0.00, 0.00)       |
| <b>Somalia</b>                          | 4.23 (3.02, 5.51)    | 38.98 (27.81, 50.83)   | 76.87 (54.43, 100.26)   | 4.89 (3.37, 6.60)    | 45.07 (31.02, 60.81)    | 84.75 (58.59, 114.52)   |
| <b>South Africa</b>                     | 60.27 (43.43, 77.00) | 112.19 (80.84, 143.33) | 146.54 (105.05, 187.65) | 78.29 (56.93, 99.75) | 145.72 (105.98, 185.67) | 186.86 (135.89, 237.91) |
| <b>South Korea</b>                      | 30.99 (22.52, 39.62) | 61.64 (44.79, 78.79)   | 45.33 (32.97, 57.95)    | 40.91 (28.68, 54.41) | 81.36 (57.05, 108.21)   | 59.65 (42.11, 79.40)    |
| <b>South Sudan</b>                      | 7.44 (5.38, 9.55)    | 60.55 (43.75, 77.68)   | 121.62 (87.40, 157.96)  | 7.34 (5.09, 9.90)    | 59.76 (41.43, 80.58)    | 112.01 (77.43, 152.44)  |
| <b>Spain</b>                            | 0.00 (0.00, 0.00)    | 0.00 (0.00, 0.00)      | 0.00 (0.00, 0.00)       | 0.00 (0.00, 0.00)    | 0.00 (0.00, 0.00)       | 0.00 (0.00, 0.00)       |
| <b>Sri Lanka</b>                        | 9.67 (7.03, 12.39)   | 46.61 (33.88, 59.69)   | 44.84 (32.61, 57.01)    | 27.05 (18.68, 35.98) | 130.36 (90.03, 173.39)  | 127.97 (90.13, 170.38)  |
| <b>Sudan</b>                            | 26.03 (18.77, 33.30) | 64.45 (46.46, 82.44)   | 112.68 (81.47, 153.89)  | 51.64 (35.95, 67.33) | 127.87 (89.01, 166.73)  | 224.43 (155.47, 293.39) |



|                            |                        |                        |                         |                        |                         |                         |
|----------------------------|------------------------|------------------------|-------------------------|------------------------|-------------------------|-------------------------|
|                            | 33.52)                 | 83.00)                 | 146.65)                 | 69.16)                 | 171.22)                 | 305.45)                 |
| <b>Suriname</b>            | 0.18 (0.13, 0.24)      | 33.41 (23.72, 43.84)   | 39.09 (27.76, 50.85)    | 0.54 (0.38, 0.70)      | 99.23 (70.12, 128.32)   | 113.04 (80.32, 146.34)  |
| <b>Swaziland</b>           | 0.79 (0.56, 1.02)      | 61.17 (43.78, 79.47)   | 114.19 (80.74, 149.79)  | 0.93 (0.57, 1.36)      | 71.86 (43.94, 105.19)   | 137.92 (85.57, 200.74)  |
| <b>Sweden</b>              | 0.00 (0.00, 0.00)      | 0.00 (0.00, 0.00)      | 0.00 (0.00, 0.00)       | 0.00 (0.00, 0.00)      | 0.00 (0.00, 0.00)       | 0.00 (0.00, 0.00)       |
| <b>Switzerland</b>         | 2.14 (1.50, 2.85)      | 25.81 (18.07, 34.38)   | 15.41 (10.77, 20.31)    | 1.28 (0.88, 1.73)      | 15.42 (10.60, 20.89)    | 8.85 (6.07, 12.05)      |
| <b>Syria</b>               | 10.71 (7.74, 13.73)    | 57.54 (41.54, 73.74)   | 90.21 (65.03, 116.49)   | 17.02 (11.81, 22.80)   | 91.37 (63.44, 122.44)   | 145.14 (95.07, 203.80)  |
| <b>Tajikistan</b>          | 4.94 (3.58, 6.35)      | 58.15 (42.11, 74.73)   | 105.26 (75.64, 135.83)  | 7.16 (5.11, 9.40)      | 84.25 (60.08, 110.54)   | 118.15 (84.06, 154.62)  |
| <b>Tanzania</b>            | 29.49 (21.40, 37.75)   | 55.26 (40.10, 70.72)   | 111.66 (80.03, 144.68)  | 29.57 (20.88, 38.78)   | 55.40 (39.13, 72.66)    | 102.94 (72.10, 136.87)  |
| <b>Thailand</b>            | 44.70 (32.46, 57.48)   | 65.84 (47.80, 84.66)   | 54.71 (39.42, 70.19)    | 120.20 (86.91, 154.57) | 177.04 (128.00, 227.66) | 147.71 (106.95, 189.58) |
| <b>The Bahamas</b>         | 0.07 (0.05, 0.09)      | 17.55 (12.20, 23.06)   | 17.97 (12.60, 23.64)    | 0.16 (0.11, 0.21)      | 41.58 (29.32, 54.40)    | 41.84 (29.32, 54.63)    |
| <b>The Gambia</b>          | 1.44 (1.05, 1.86)      | 72.18 (52.26, 92.74)   | 154.64 (112.08, 199.68) | 1.56 (1.10, 2.07)      | 78.09 (54.87, 103.59)   | 152.74 (108.08, 202.17) |
| <b>Timor-Leste</b>         | 0.12 (0.08, 0.15)      | 9.82 (6.98, 12.85)     | 15.97 (11.34, 20.86)    | 0.31 (0.20, 0.45)      | 26.36 (16.72, 38.10)    | 41.55 (26.17, 59.52)    |
| <b>Togo</b>                | 6.53 (4.73, 8.38)      | 89.42 (64.76, 114.73)  | 163.94 (117.68, 212.81) | 6.75 (4.48, 9.37)      | 92.38 (61.29, 128.24)   | 158.90 (106.35, 219.49) |
| <b>Tonga</b>               | 0.00 (0.00, 0.00)      | 0.00 (0.00, 0.00)      | 0.00 (0.00, 0.00)       | 0.00 (0.00, 0.00)      | 0.00 (0.00, 0.00)       | 0.00 (0.00, 0.00)       |
| <b>Trinidad and Tobago</b> | 0.34 (0.24, 0.44)      | 24.73 (17.42, 32.52)   | 22.64 (15.85, 29.68)    | 0.79 (0.56, 1.03)      | 58.21 (41.50, 75.65)    | 53.06 (37.48, 68.83)    |
| <b>Tunisia</b>             | 10.87 (7.83, 14.03)    | 96.60 (69.60, 124.68)  | 99.93 (72.54, 128.48)   | 17.39 (11.77, 23.70)   | 154.56 (104.59, 210.69) | 166.84 (112.62, 226.87) |
| <b>Turkey</b>              | 107.73 (77.61, 138.62) | 137.38 (98.97, 176.77) | 147.75 (106.34, 190.82) | 103.23 (73.62, 134.37) | 131.64 (93.88, 171.35)  | 144.75 (103.04, 189.76) |
| <b>Turkmenistan</b>        | 4.49 (3.23, 5.76)      | 83.47 (59.96, 107.04)  | 125.07 (88.85, 162.56)  | 8.08 (5.91, 10.19)     | 150.22 (109.89, 189.36) | 192.21 (140.50, 242.68) |
| <b>Uganda</b>              | 18.97 (13.84, 24.23)   | 48.46 (35.34, 61.89)   | 116.67 (84.54, 150.41)  | 20.43 (14.50, 26.67)   | 52.19 (37.04, 68.12)    | 112.70 (79.91, 149.04)  |
| <b>Ukraine</b>             | 31.03 (21.74, 40.58)   | 66.73 (46.74, 87.25)   | 44.57 (31.62, 58.46)    | 15.15 (10.40, 20.57)   | 32.58 (22.36, 44.23)    | 23.64 (16.18, 32.30)    |
| <b>United Arab</b>         | 5.89 (4.26, 7.60)      | 64.39 (46.57, 82.21)   | 104.27 (75.17, 133.37)  | 11.63 (7.43, 15.83)    | 127.18 (81.21, 173.15)  | 217.26 (144.57, 289.95) |

|                                                                                  |                      |                        |                         |                        |                         |                         |
|----------------------------------------------------------------------------------|----------------------|------------------------|-------------------------|------------------------|-------------------------|-------------------------|
| <b>Emirates</b>                                                                  |                      | 83.11)                 | 134.17)                 | 16.37)                 | 178.99)                 | 299.97)                 |
| <b>United Kingdom</b>                                                            | 9.43 (6.59, 12.36)   | 14.67 (10.26, 19.25)   | 8.85 (6.21, 11.60)      | 6.35 (4.46, 8.39)      | 9.89 (6.94, 13.07)      | 6.12 (4.27, 8.10)       |
| <b>United States</b>                                                             | 0.00 (0.00, 0.00)    | 0.00 (0.00, 0.00)      | 0.00 (0.00, 0.00)       | 0.00 (0.00, 0.00)      | 0.00 (0.00, 0.00)       | 0.00 (0.00, 0.00)       |
| <b>Uruguay</b>                                                                   | 0.33 (0.23, 0.44)    | 9.51 (6.58, 12.70)     | 6.97 (4.87, 9.27)       | 0.41 (0.29, 0.54)      | 12.02 (8.48, 15.75)     | 9.01 (6.34, 11.73)      |
| <b>Uzbekistan</b>                                                                | 22.17 (15.98, 28.45) | 74.03 (53.37, 95.03)   | 105.80 (75.84, 136.97)  | 36.51 (26.41, 46.89)   | 121.94 (88.20, 156.62)  | 145.71 (105.49, 185.71) |
| <b>Vanuatu</b>                                                                   | 0.00 (0.00, 0.00)    | 0.00 (0.00, 0.00)      | 0.00 (0.00, 0.00)       | 0.00 (0.00, 0.00)      | 0.00 (0.00, 0.00)       | 0.00 (0.00, 0.00)       |
| <b>Venezuela</b>                                                                 | 32.17 (22.93, 42.01) | 103.43 (73.73, 135.05) | 131.52 (94.17, 170.60)  | 48.77 (34.76, 63.70)   | 156.79 (111.74, 204.78) | 194.19 (137.84, 254.47) |
| <b>Vietnam</b>                                                                   | 27.89 (20.21, 35.80) | 29.84 (21.62, 38.30)   | 33.74 (24.45, 43.41)    | 104.22 (74.13, 135.01) | 111.50 (79.31, 144.44)  | 123.22 (88.58, 160.01)  |
| <b>Virgin Islands, U.S.</b>                                                      | 0.05 (0.04, 0.07)    | 47.66 (33.60, 62.81)   | 30.54 (21.54, 40.20)    | 0.10 (0.07, 0.13)      | 92.05 (64.52, 121.11)   | 61.65 (43.18, 81.47)    |
| <b>Yemen</b>                                                                     | 16.01 (11.57, 20.53) | 59.50 (42.98, 76.27)   | 119.38 (86.19, 154.56)  | 29.90 (19.63, 41.81)   | 111.09 (72.96, 155.36)  | 235.43 (152.58, 331.79) |
| <b>Zambia</b>                                                                    | 9.85 (7.13, 12.61)   | 60.64 (43.90, 77.58)   | 132.06 (94.54, 170.67)  | 10.91 (7.58, 14.49)    | 67.12 (46.63, 89.15)    | 130.59 (91.31, 173.75)  |
| <b>Zimbabwe</b>                                                                  | 10.43 (7.46, 13.42)  | 66.94 (47.92, 86.14)   | 143.36 (101.91, 186.83) | 13.56 (9.34, 18.47)    | 87.10 (59.98, 118.61)   | 186.08 (126.46, 253.26) |
| <b>Attributable burden of disease, ABD; Disability Adjusted Life Years, DALY</b> |                      |                        |                         |                        |                         |                         |

**Supplemental Table 5:** Years living with disability (YLD) and years of life lost (YLL) using the World Health Organization recommended level of PM<sub>2.5</sub> as the theoretical minimum risk exposure level (TMREL), 10 ug/m<sup>3</sup>

| <b>Location</b>    | <b>YLD (in 1000s)</b>         | <b>YLD (per 100,000)</b> | <b>Age Standardized YLD (per 100,000)</b> | <b>YLL in 1000s</b>           | <b>YLL (per 100,000)</b> | <b>Age Standardized YLL (per 100,000)</b> |
|--------------------|-------------------------------|--------------------------|-------------------------------------------|-------------------------------|--------------------------|-------------------------------------------|
| <b>Global</b>      | 2,047.18 (1,352.47, 2,852.81) | 27.77 (18.35, 38.70)     | 29.57 (19.51, 41.12)                      | 6,189.43 (4,532.12, 7,756.55) | 83.97 (61.49, 105.23)    | 88.41 (64.89, 110.21)                     |
| <b>Afghanistan</b> | 11.38 (7.40, 16.05)           | 34.91 (22.70, 49.23)     | 72.66 (47.99, 101.24)                     | 58.20 (36.71, 84.14)          | 178.50 (112.59, 258.04)  | 371.49 (234.67, 535.24)                   |
| <b>Albania</b>     | 0.35 (0.22, 0.51)             | 12.23 (7.66, 17.63)      | 10.16 (6.56, 14.44)                       | 1.24 (0.86, 1.68)             | 42.80 (29.59, 57.99)     | 36.93 (25.52, 49.36)                      |

|                            |                      |                      |                      |                        |                        |                         |
|----------------------------|----------------------|----------------------|----------------------|------------------------|------------------------|-------------------------|
| <b>Algeria</b>             | 16.51 (10.74, 23.36) | 41.67 (27.11, 58.94) | 51.08 (33.70, 71.66) | 34.37 (23.90, 46.24)   | 86.72 (60.30, 116.67)  | 117.49 (82.32, 157.01)  |
| <b>American Samoa</b>      | 0.00 (0.00, 0.00)    | 0.00 (0.00, 0.00)    | 0.00 (0.00, 0.00)    | 0.00 (0.00, 0.00)      | 0.00 (0.00, 0.00)      | 0.00 (0.00, 0.00)       |
| <b>Andorra</b>             | 0.00 (0.00, 0.00)    | 0.00 (0.00, 0.00)    | 0.00 (0.00, 0.00)    | 0.00 (0.00, 0.00)      | 0.00 (0.00, 0.00)      | 0.00 (0.00, 0.00)       |
| <b>Angola</b>              | 4.75 (3.06, 6.74)    | 18.80 (12.11, 26.70) | 45.42 (28.98, 65.41) | 8.12 (4.89, 11.95)     | 32.17 (19.37, 47.33)   | 63.10 (37.35, 93.36)    |
| <b>Antigua and Barbuda</b> | 0.01 (0.00, 0.01)    | 7.35 (4.67, 10.61)   | 7.93 (4.96, 11.45)   | 0.03 (0.02, 0.04)      | 32.66 (22.97, 43.06)   | 33.92 (23.76, 44.69)    |
| <b>Argentina</b>           | 3.79 (2.46, 5.41)    | 8.72 (5.67, 12.45)   | 8.23 (5.38, 11.63)   | 11.18 (7.97, 14.44)    | 25.75 (18.36, 33.26)   | 24.17 (17.10, 31.29)    |
| <b>Armenia</b>             | 1.35 (0.86, 1.93)    | 44.80 (28.75, 64.14) | 38.16 (24.70, 53.90) | 1.57 (1.14, 2.01)      | 52.35 (37.83, 66.75)   | 44.76 (32.53, 57.09)    |
| <b>Australia</b>           | 0.00 (0.00, 0.00)    | 0.00 (0.00, 0.00)    | 0.00 (0.00, 0.00)    | 0.00 (0.00, 0.00)      | 0.00 (0.00, 0.00)      | 0.00 (0.00, 0.00)       |
| <b>Austria</b>             | 1.39 (0.91, 1.97)    | 16.06 (10.46, 22.69) | 9.76 (6.33, 13.77)   | 3.31 (2.39, 4.23)      | 38.18 (27.54, 48.85)   | 20.31 (14.58, 25.97)    |
| <b>Azerbaijan</b>          | 3.37 (2.15, 4.82)    | 34.42 (21.96, 49.26) | 39.75 (25.46, 56.39) | 7.84 (5.42, 10.57)     | 80.15 (55.38, 108.05)  | 85.05 (59.61, 114.53)   |
| <b>Bahrain</b>             | 0.45 (0.29, 0.64)    | 33.23 (21.28, 46.95) | 45.79 (30.36, 63.51) | 0.80 (0.53, 1.10)      | 58.73 (39.05, 80.81)   | 122.97 (81.37, 170.08)  |
| <b>Bangladesh</b>          | 37.08 (23.69, 52.70) | 23.04 (14.72, 32.74) | 32.69 (20.97, 46.84) | 121.54 (86.25, 157.96) | 75.51 (53.59, 98.13)   | 99.06 (70.79, 128.22)   |
| <b>Barbados</b>            | 0.04 (0.02, 0.05)    | 13.42 (8.66, 19.25)  | 10.15 (6.51, 14.53)  | 0.14 (0.10, 0.19)      | 51.08 (36.17, 66.61)   | 38.98 (27.74, 50.58)    |
| <b>Belarus</b>             | 1.97 (1.24, 2.84)    | 20.52 (12.95, 29.55) | 14.79 (9.32, 21.28)  | 1.97 (1.38, 2.61)      | 20.53 (14.38, 27.16)   | 15.50 (10.78, 20.51)    |
| <b>Belgium</b>             | 1.32 (0.85, 1.89)    | 11.67 (7.52, 16.67)  | 7.23 (4.69, 10.30)   | 2.35 (1.67, 3.07)      | 20.73 (14.76, 27.09)   | 11.06 (7.87, 14.31)     |
| <b>Belize</b>              | 0.08 (0.05, 0.11)    | 20.92 (13.45, 29.53) | 33.49 (21.07, 47.66) | 0.50 (0.35, 0.65)      | 139.14 (98.42, 182.17) | 223.10 (160.26, 290.39) |
| <b>Benin</b>               | 3.10 (1.99, 4.44)    | 28.39 (18.23, 40.69) | 58.86 (37.41, 83.26) | 8.58 (5.84, 11.62)     | 78.58 (53.52, 106.50)  | 124.46 (85.32, 168.16)  |
| <b>Bermuda</b>             | 0.00 (0.00, 0.00)    | 0.00 (0.00, 0.00)    | 0.00 (0.00, 0.00)    | 0.00 (0.00, 0.00)      | 0.00 (0.00, 0.00)      | 0.00 (0.00, 0.00)       |
| <b>Bhutan</b>              | 0.20 (0.13, 0.29)    | 26.43 (17.18, 37.83) | 37.69 (24.18, 53.67) | 0.70 (0.44, 0.99)      | 89.89 (57.38, 127.53)  | 120.96 (78.99, 170.14)  |
| <b>Bolivia</b>             | 2.16 (1.39, 3.11)    | 20.03 (12.91, 27.15) | 27.69 (17.71, 37.67) | 16.08 (10.71, 21.45)   | 149.34 (99.51, 200.17) | 199.67 (131.35, 268.00) |

|                                 |                         |                      |                      |                           |                       |                        |
|---------------------------------|-------------------------|----------------------|----------------------|---------------------------|-----------------------|------------------------|
|                                 | 3.05)                   | 28.34)               | 39.25)               | 22.15)                    | 205.76)               | 277.55)                |
| <b>Bosnia and Herzegovina</b>   | 1.31 (0.86, 1.84)       | 34.35 (22.45, 48.37) | 23.40 (15.40, 32.78) | 2.71 (1.91, 3.59)         | 71.24 (50.11, 94.22)  | 48.35 (34.13, 63.61)   |
| <b>Botswana</b>                 | 0.35 (0.22, 0.50)       | 15.37 (9.81, 22.02)  | 24.81 (15.85, 35.70) | 0.71 (0.33, 1.18)         | 31.32 (14.44, 52.24)  | 53.00 (26.08, 85.70)   |
| <b>Brazil</b>                   | 4.41 (2.80, 6.34)       | 2.12 (1.34, 3.05)    | 2.33 (1.50, 3.35)    | 16.97 (12.08, 21.84)      | 8.17 (5.81, 10.51)    | 8.80 (6.27, 11.28)     |
| <b>Brunei</b>                   | 0.00 (0.00, 0.00)       | 0.00 (0.00, 0.00)    | 0.00 (0.00, 0.00)    | 0.00 (0.00, 0.00)         | 0.00 (0.00, 0.00)     | 0.00 (0.00, 0.00)      |
| <b>Bulgaria</b>                 | 2.50 (1.59, 3.61)       | 34.41 (21.82, 49.60) | 20.53 (13.08, 29.27) | 6.27 (4.42, 8.25)         | 86.29 (60.85, 113.56) | 55.44 (39.18, 73.03)   |
| <b>Burkina Faso</b>             | 4.35 (2.73, 6.24)       | 24.04 (15.12, 34.48) | 56.15 (35.78, 79.70) | 8.55 (6.01, 11.37)        | 47.26 (33.19, 62.82)  | 81.24 (58.85, 103.59)  |
| <b>Burundi</b>                  | 2.31 (1.43, 3.36)       | 20.52 (12.68, 29.88) | 44.99 (28.60, 64.69) | 3.99 (2.70, 5.41)         | 35.45 (24.04, 48.15)  | 62.29 (42.49, 84.83)   |
| <b>Cambodia</b>                 | 1.98 (1.26, 2.83)       | 12.68 (8.08, 18.16)  | 19.94 (12.95, 28.24) | 12.83 (9.19, 16.42)       | 82.28 (58.93, 105.28) | 119.54 (85.88, 153.06) |
| <b>Cameroon</b>                 | 5.81 (3.63, 8.39)       | 24.83 (15.52, 35.84) | 50.15 (31.94, 71.52) | 21.11 (12.83, 30.99)      | 90.19 (54.82, 132.44) | 133.16 (81.95, 194.45) |
| <b>Canada</b>                   | 0.00 (0.00, 0.00)       | 0.00 (0.00, 0.00)    | 0.00 (0.00, 0.00)    | 0.00 (0.00, 0.00)         | 0.00 (0.00, 0.00)     | 0.00 (0.00, 0.00)      |
| <b>Cape Verde</b>               | 0.19 (0.13, 0.28)       | 37.42 (24.19, 53.26) | 56.20 (36.22, 79.52) | 0.36 (0.26, 0.48)         | 70.08 (49.24, 92.83)  | 95.20 (67.30, 125.84)  |
| <b>Central African Republic</b> | 1.29 (0.84, 1.85)       | 26.40 (17.04, 37.66) | 49.12 (31.59, 70.11) | 2.83 (1.89, 3.88)         | 57.76 (38.53, 79.11)  | 88.58 (59.53, 120.91)  |
| <b>Chad</b>                     | 3.68 (2.33, 5.29)       | 26.15 (16.56, 37.60) | 62.49 (39.21, 89.07) | 12.53 (8.60, 16.88)       | 89.10 (61.14, 120.06) | 127.12 (88.85, 171.12) |
| <b>Chile</b>                    | 5.86 (3.93, 8.15)       | 32.67 (21.89, 45.40) | 28.63 (18.99, 39.72) | 12.46 (8.21, 17.15)       | 69.41 (45.76, 95.58)  | 60.53 (40.65, 83.93)   |
| <b>China</b>                    | 331.78 (218.42, 466.00) | 23.98 (15.79, 33.68) | 21.03 (13.78, 29.52) | 856.85 (624.59, 1,078.57) | 61.94 (45.15, 77.96)  | 54.86 (40.22, 69.46)   |
| <b>Colombia</b>                 | 8.95 (5.86, 12.53)      | 18.55 (12.15, 25.96) | 21.15 (13.94, 29.73) | 22.82 (16.39, 29.50)      | 47.28 (33.95, 61.12)  | 56.01 (39.94, 71.97)   |
| <b>Comoros</b>                  | 0.11 (0.07, 0.16)       | 13.94 (8.47, 20.30)  | 26.87 (16.31, 39.51) | 0.14 (0.08, 0.21)         | 17.18 (9.56, 26.49)   | 29.47 (16.21, 46.31)   |
| <b>Congo</b>                    | 1.11 (0.71, 1.58)       | 24.06 (15.39, 34.22) | 46.15 (29.49, 65.68) | 1.93 (1.27, 2.70)         | 41.69 (27.52, 58.39)  | 72.35 (47.47, 102.93)  |
| <b>Costa Rica</b>               | 1.26 (0.82, 1.80)       | 26.29 (17.00, 37.51) | 26.52 (16.89, 37.76) | 4.34 (3.15, 5.51)         | 90.21 (65.46, 114.55) | 90.06 (65.08, 114.16)  |

|                                         |                      |                      |                      |                       |                         |                         |
|-----------------------------------------|----------------------|----------------------|----------------------|-----------------------|-------------------------|-------------------------|
| <b>Cote d'Ivoire</b>                    | 6.07 (3.80, 8.80)    | 26.76 (16.73, 38.79) | 54.16 (34.62, 77.47) | 18.89 (12.82, 25.99)  | 83.25 (56.49, 114.55)   | 126.83 (83.68, 176.27)  |
| <b>Croatia</b>                          | 1.16 (0.76, 1.63)    | 27.24 (17.86, 38.51) | 16.60 (10.83, 23.33) | 2.35 (1.68, 3.03)     | 55.34 (39.71, 71.43)    | 31.67 (22.90, 40.74)    |
| <b>Cuba</b>                             | 1.78 (1.12, 2.57)    | 15.61 (9.86, 22.60)  | 11.49 (7.11, 16.73)  | 5.75 (4.12, 7.40)     | 50.51 (36.15, 64.94)    | 37.56 (27.06, 48.30)    |
| <b>Cyprus</b>                           | 0.13 (0.08, 0.19)    | 14.74 (9.42, 20.94)  | 11.20 (7.27, 15.77)  | 0.46 (0.33, 0.59)     | 51.55 (37.19, 66.01)    | 37.05 (26.77, 47.23)    |
| <b>Czech Republic</b>                   | 2.97 (1.93, 4.18)    | 27.72 (18.07, 39.04) | 17.92 (11.67, 25.29) | 3.88 (2.81, 4.91)     | 36.31 (26.31, 45.88)    | 22.97 (16.70, 28.99)    |
| <b>Democratic Republic of the Congo</b> | 16.28 (10.49, 23.09) | 21.03 (13.55, 29.83) | 47.02 (30.71, 66.80) | 24.29 (17.18, 32.09)  | 31.38 (22.20, 41.45)    | 56.41 (39.94, 73.63)    |
| <b>Denmark</b>                          | 0.09 (0.06, 0.13)    | 1.57 (1.01, 2.25)    | 1.02 (0.65, 1.45)    | 0.16 (0.11, 0.21)     | 2.79 (1.94, 3.72)       | 1.68 (1.17, 2.23)       |
| <b>Djibouti</b>                         | 0.26 (0.16, 0.37)    | 28.73 (17.91, 41.12) | 49.96 (31.19, 72.63) | 0.37 (0.23, 0.54)     | 41.87 (26.26, 60.66)    | 63.99 (40.03, 92.06)    |
| <b>Dominica</b>                         | 0.01 (0.00, 0.01)    | 8.68 (5.45, 12.45)   | 8.83 (5.54, 12.83)   | 0.03 (0.02, 0.04)     | 45.61 (31.89, 60.63)    | 46.29 (32.37, 61.20)    |
| <b>Dominican Republic</b>               | 1.36 (0.88, 1.93)    | 12.89 (8.38, 18.30)  | 15.83 (10.23, 22.46) | 6.44 (4.54, 8.57)     | 61.16 (43.10, 81.36)    | 74.13 (51.99, 98.03)    |
| <b>Ecuador</b>                          | 0.70 (0.44, 1.00)    | 4.31 (2.70, 6.16)    | 5.33 (3.34, 7.71)    | 5.26 (3.72, 6.80)     | 32.54 (23.05, 42.11)    | 40.58 (28.89, 52.39)    |
| <b>Egypt</b>                            | 37.61 (24.40, 53.11) | 41.26 (26.77, 58.26) | 56.31 (37.08, 78.54) | 86.38 (52.51, 126.17) | 94.76 (57.61, 138.42)   | 140.01 (83.80, 210.08)  |
| <b>El Salvador</b>                      | 2.36 (1.56, 3.28)    | 38.47 (25.48, 53.52) | 43.60 (29.03, 60.66) | 18.89 (13.48, 24.53)  | 307.81 (219.64, 399.65) | 346.83 (246.67, 453.72) |
| <b>Equatorial Guinea</b>                | 0.22 (0.14, 0.31)    | 26.05 (16.43, 37.21) | 45.32 (29.33, 64.00) | 0.24 (0.10, 0.40)     | 27.94 (11.75, 47.08)    | 46.88 (20.55, 77.19)    |
| <b>Eritrea</b>                          | 1.14 (0.71, 1.63)    | 21.69 (13.54, 31.09) | 47.04 (29.89, 68.11) | 1.83 (1.23, 2.51)     | 34.92 (23.54, 47.90)    | 64.88 (44.43, 89.00)    |
| <b>Estonia</b>                          | 0.00 (0.00, 0.00)    | 0.00 (0.00, 0.00)    | 0.00 (0.00, 0.00)    | 0.00 (0.00, 0.00)     | 0.00 (0.00, 0.00)       | 0.00 (0.00, 0.00)       |
| <b>Ethiopia</b>                         | 23.83 (15.00, 34.32) | 23.97 (15.09, 34.52) | 48.77 (30.22, 71.45) | 44.18 (30.67, 58.65)  | 44.43 (30.85, 58.98)    | 79.02 (55.61, 105.48)   |
| <b>Federated States of Micronesia</b>   | 0.00 (0.00, 0.00)    | 0.00 (0.00, 0.00)    | 0.00 (0.00, 0.00)    | 0.00 (0.00, 0.00)     | 0.00 (0.00, 0.00)       | 0.00 (0.00, 0.00)       |
| <b>Fiji</b>                             | 0.00 (0.00, 0.00)    | 0.00 (0.00, 0.00)    | 0.00 (0.00, 0.00)    | 0.00 (0.00, 0.00)     | 0.00 (0.00, 0.00)       | 0.00 (0.00, 0.00)       |

|                      |                         |                      |                       |                               |                         |                         |
|----------------------|-------------------------|----------------------|-----------------------|-------------------------------|-------------------------|-------------------------|
| <b>Finland</b>       | 0.00 (0.00, 0.00)       | 0.00 (0.00, 0.00)    | 0.00 (0.00, 0.00)     | 0.00 (0.00, 0.00)             | 0.00 (0.00, 0.00)       | 0.00 (0.00, 0.00)       |
| <b>France</b>        | 3.11 (2.03, 4.41)       | 4.76 (3.11, 6.77)    | 2.95 (1.91, 4.20)     | 4.23 (3.00, 5.48)             | 6.49 (4.60, 8.40)       | 3.31 (2.35, 4.27)       |
| <b>Gabon</b>         | 0.50 (0.32, 0.70)       | 28.69 (18.34, 40.78) | 46.46 (29.80, 66.25)  | 0.84 (0.53, 1.21)             | 48.90 (30.79, 70.37)    | 74.79 (47.27, 107.42)   |
| <b>Georgia</b>       | 1.86 (1.20, 2.65)       | 46.54 (30.03, 66.21) | 35.34 (23.26, 49.51)  | 3.65 (2.63, 4.71)             | 91.14 (65.70, 117.61)   | 72.98 (52.61, 94.05)    |
| <b>Germany</b>       | 8.06 (5.24, 11.45)      | 9.63 (6.27, 13.69)   | 5.28 (3.45, 7.55)     | 20.35 (14.52, 26.20)          | 24.33 (17.36, 31.33)    | 11.19 (7.93, 14.43)     |
| <b>Ghana</b>         | 8.84 (5.59, 12.70)      | 32.23 (20.38, 46.34) | 58.37 (37.61, 83.81)  | 18.51 (13.07, 24.49)          | 67.52 (47.67, 89.31)    | 99.14 (69.87, 131.27)   |
| <b>Greece</b>        | 1.07 (0.70, 1.50)       | 9.83 (6.44, 13.75)   | 5.43 (3.51, 7.64)     | 2.44 (1.73, 3.16)             | 22.35 (15.82, 28.97)    | 10.75 (7.65, 13.89)     |
| <b>Greenland</b>     | 0.00 (0.00, 0.00)       | 0.00 (0.00, 0.00)    | 0.00 (0.00, 0.00)     | 0.00 (0.00, 0.00)             | 0.00 (0.00, 0.00)       | 0.00 (0.00, 0.00)       |
| <b>Grenada</b>       | 0.01 (0.01, 0.02)       | 10.16 (6.56, 14.37)  | 11.75 (7.54, 16.63)   | 0.08 (0.05, 0.10)             | 70.22 (49.43, 92.89)    | 81.18 (56.83, 106.89)   |
| <b>Guam</b>          | 0.00 (0.00, 0.00)       | 0.00 (0.00, 0.00)    | 0.00 (0.00, 0.00)     | 0.00 (0.00, 0.00)             | 0.00 (0.00, 0.00)       | 0.00 (0.00, 0.00)       |
| <b>Guatemala</b>     | 4.73 (3.07, 6.64)       | 28.94 (18.78, 40.59) | 46.99 (30.68, 65.82)  | 26.09 (17.47, 35.84)          | 159.50 (106.84, 219.12) | 246.08 (164.39, 337.58) |
| <b>Guinea</b>        | 3.04 (1.91, 4.35)       | 24.19 (15.18, 34.62) | 48.23 (30.41, 69.71)  | 6.97 (4.64, 9.66)             | 55.45 (36.87, 76.79)    | 82.86 (55.23, 114.90)   |
| <b>Guinea-Bissau</b> | 0.68 (0.43, 0.97)       | 36.93 (23.20, 52.74) | 70.17 (44.44, 100.88) | 2.21 (1.53, 3.01)             | 119.33 (82.89, 162.89)  | 180.09 (123.43, 245.78) |
| <b>Guyana</b>        | 0.08 (0.05, 0.11)       | 9.99 (6.40, 14.25)   | 13.15 (8.41, 18.83)   | 0.52 (0.37, 0.68)             | 67.28 (47.75, 88.08)    | 80.77 (57.43, 105.42)   |
| <b>Haiti</b>         | 2.23 (1.43, 3.18)       | 20.84 (13.32, 29.67) | 33.43 (21.78, 47.35)  | 15.78 (9.78, 22.75)           | 147.20 (91.19, 212.16)  | 207.97 (129.75, 304.16) |
| <b>Honduras</b>      | 2.10 (1.34, 3.00)       | 25.89 (16.50, 37.04) | 40.84 (26.30, 57.89)  | 13.57 (8.47, 19.78)           | 167.57 (104.57, 244.32) | 269.11 (169.22, 385.92) |
| <b>Hungary</b>       | 3.19 (2.09, 4.53)       | 31.41 (20.59, 44.56) | 20.06 (13.09, 28.12)  | 5.26 (3.84, 6.69)             | 51.78 (37.80, 65.79)    | 32.64 (23.78, 41.63)    |
| <b>Iceland</b>       | 0.00 (0.00, 0.00)       | 0.00 (0.00, 0.00)    | 0.00 (0.00, 0.00)     | 0.00 (0.00, 0.00)             | 0.00 (0.00, 0.00)       | 0.00 (0.00, 0.00)       |
| <b>India</b>         | 321.95 (209.02, 458.60) | 24.55 (15.94, 34.96) | 32.64 (21.08, 46.40)  | 1,474.63 (1,061.17, 1,912.57) | 112.43 (80.90, 145.82)  | 138.74 (99.54, 179.15)  |



|                   |                      |                      |                       |                        |                        |                         |
|-------------------|----------------------|----------------------|-----------------------|------------------------|------------------------|-------------------------|
| <b>Indonesia</b>  | 20.12 (12.80, 28.94) | 7.81 (4.97, 11.23)   | 9.92 (6.37, 14.17)    | 111.23 (80.12, 141.74) | 43.18 (31.10, 55.02)   | 50.58 (36.47, 64.90)    |
| <b>Iran</b>       | 28.80 (18.43, 40.61) | 36.44 (23.32, 51.38) | 45.00 (29.25, 63.43)  | 46.01 (31.39, 62.97)   | 58.22 (39.72, 79.67)   | 81.82 (54.70, 112.73)   |
| <b>Iraq</b>       | 13.83 (8.95, 19.67)  | 37.97 (24.58, 54.01) | 73.16 (47.17, 102.82) | 40.16 (26.07, 56.62)   | 110.27 (71.57, 155.45) | 229.39 (149.71, 321.96) |
| <b>Ireland</b>    | 0.00 (0.00, 0.00)    | 0.00 (0.00, 0.00)    | 0.00 (0.00, 0.00)     | 0.00 (0.00, 0.00)      | 0.00 (0.00, 0.00)      | 0.00 (0.00, 0.00)       |
| <b>Israel</b>     | 2.09 (1.40, 2.89)    | 25.95 (17.34, 35.89) | 23.94 (15.95, 33.16)  | 5.65 (3.94, 7.62)      | 70.20 (48.95, 94.67)   | 61.63 (42.72, 83.12)    |
| <b>Italy</b>      | 14.15 (9.32, 20.00)  | 22.53 (14.84, 31.85) | 12.06 (7.69, 17.11)   | 27.87 (20.24, 35.52)   | 44.38 (32.22, 56.56)   | 19.95 (14.40, 25.31)    |
| <b>Jamaica</b>    | 0.48 (0.31, 0.69)    | 17.14 (11.12, 24.35) | 17.84 (11.51, 25.43)  | 2.32 (1.45, 3.35)      | 82.00 (51.19, 118.28)  | 85.43 (54.56, 123.21)   |
| <b>Japan</b>      | 21.47 (14.32, 30.11) | 16.73 (11.16, 23.46) | 8.23 (5.40, 11.60)    | 26.97 (19.23, 34.38)   | 21.02 (14.99, 26.79)   | 8.66 (6.18, 11.05)      |
| <b>Jordan</b>     | 2.44 (1.58, 3.45)    | 32.19 (20.85, 45.56) | 53.15 (34.73, 74.27)  | 6.45 (4.23, 9.15)      | 85.19 (55.83, 120.81)  | 159.42 (103.99, 222.47) |
| <b>Kazakhstan</b> | 3.82 (2.42, 5.48)    | 21.77 (13.80, 31.22) | 25.86 (16.34, 37.22)  | 6.30 (4.37, 8.45)      | 35.91 (24.95, 48.21)   | 39.04 (27.02, 52.79)    |
| <b>Kenya</b>      | 3.80 (2.34, 5.50)    | 8.22 (5.06, 11.90)   | 17.10 (10.69, 24.81)  | 4.75 (3.21, 6.52)      | 10.28 (6.95, 14.12)    | 18.54 (12.62, 25.56)    |
| <b>Kiribati</b>   | 0.00 (0.00, 0.00)    | 0.00 (0.00, 0.00)    | 0.00 (0.00, 0.00)     | 0.00 (0.00, 0.00)      | 0.00 (0.00, 0.00)      | 0.00 (0.00, 0.00)       |
| <b>Kuwait</b>     | 1.20 (0.77, 1.70)    | 30.72 (19.84, 43.62) | 44.74 (29.67, 62.64)  | 1.05 (0.68, 1.49)      | 26.96 (17.38, 38.24)   | 69.41 (45.60, 96.77)    |
| <b>Kyrgyzstan</b> | 0.87 (0.56, 1.26)    | 14.82 (9.44, 21.32)  | 21.74 (13.81, 31.04)  | 2.17 (1.56, 2.81)      | 36.88 (26.53, 47.67)   | 42.44 (30.47, 54.85)    |
| <b>Laos</b>       | 1.01 (0.65, 1.42)    | 14.81 (9.55, 20.85)  | 25.84 (16.91, 36.11)  | 7.60 (5.42, 10.03)     | 111.81 (79.72, 147.52) | 162.90 (116.05, 212.45) |
| <b>Latvia</b>     | 0.77 (0.48, 1.11)    | 34.81 (21.71, 50.28) | 20.85 (13.31, 30.06)  | 0.82 (0.60, 1.06)      | 37.18 (26.91, 48.02)   | 23.97 (17.24, 30.85)    |
| <b>Lebanon</b>    | 2.04 (1.33, 2.89)    | 35.47 (23.14, 50.11) | 37.86 (24.58, 53.38)  | 2.28 (1.59, 3.04)      | 39.53 (27.52, 52.77)   | 43.56 (30.06, 58.69)    |
| <b>Lesotho</b>    | 0.57 (0.36, 0.80)    | 26.65 (16.99, 37.80) | 46.85 (30.05, 66.51)  | 1.45 (0.88, 2.08)      | 68.07 (41.32, 97.76)   | 121.69 (77.01, 173.73)  |
| <b>Liberia</b>    | 0.00 (0.00, 0.00)    | 0.00 (0.00, 0.00)    | 0.00 (0.00, 0.00)     | 0.00 (0.00, 0.00)      | 0.00 (0.00, 0.00)      | 0.00 (0.00, 0.00)       |
| <b>Libya</b>      | 2.23 (1.42, 3.04)    | 35.36 (22.49, 48.23) | 46.50 (29.87, 63.13)  | 7.14 (4.85, 9.43)      | 113.45 (77.09, 149.81) | 172.32 (119.22, 225.42) |



|                         |                      |                      |                      |                         |                         |                         |
|-------------------------|----------------------|----------------------|----------------------|-------------------------|-------------------------|-------------------------|
|                         | 3.19)                | 50.60)               | 65.78)               | 9.72)                   | 154.34)                 | 232.55)                 |
| <b>Lithuania</b>        | 0.89 (0.56, 1.28)    | 28.24 (17.74, 40.50) | 17.04 (10.74, 24.36) | 0.78 (0.56, 0.99)       | 24.78 (17.86, 31.54)    | 16.42 (11.84, 20.85)    |
| <b>Luxembourg</b>       | 0.06 (0.04, 0.09)    | 11.11 (7.24, 15.74)  | 8.10 (5.21, 11.45)   | 0.11 (0.08, 0.14)       | 19.89 (14.17, 25.87)    | 13.41 (9.60, 17.33)     |
| <b>Macedonia</b>        | 0.65 (0.42, 0.91)    | 31.14 (20.16, 43.97) | 24.97 (16.15, 35.05) | 1.60 (1.16, 2.03)       | 76.95 (56.06, 97.74)    | 60.84 (44.31, 77.06)    |
| <b>Madagascar</b>       | 3.36 (2.10, 4.87)    | 13.87 (8.68, 20.13)  | 28.95 (18.03, 41.75) | 5.80 (3.78, 8.11)       | 23.98 (15.64, 33.53)    | 39.25 (26.46, 54.52)    |
| <b>Malawi</b>           | 3.00 (1.86, 4.35)    | 17.44 (10.78, 25.27) | 39.69 (24.63, 58.00) | 6.15 (4.15, 8.45)       | 35.72 (24.11, 49.08)    | 63.21 (42.89, 86.75)    |
| <b>Malaysia</b>         | 2.42 (1.53, 3.50)    | 7.99 (5.04, 11.55)   | 9.96 (6.17, 14.52)   | 8.82 (6.28, 11.47)      | 29.11 (20.73, 37.88)    | 37.66 (26.80, 48.94)    |
| <b>Maldives</b>         | 0.06 (0.04, 0.08)    | 16.04 (10.34, 22.99) | 22.73 (14.69, 32.24) | 0.35 (0.24, 0.48)       | 96.76 (64.94, 132.54)   | 148.14 (101.30, 203.53) |
| <b>Mali</b>             | 4.56 (2.88, 6.50)    | 25.95 (16.37, 36.99) | 60.85 (38.91, 87.43) | 11.76 (7.72, 16.48)     | 66.94 (43.93, 93.80)    | 100.92 (66.62, 141.60)  |
| <b>Malta</b>            | 0.05 (0.03, 0.08)    | 12.63 (8.13, 18.04)  | 8.13 (5.27, 11.59)   | 0.12 (0.08, 0.16)       | 28.88 (19.97, 38.96)    | 17.53 (12.08, 23.68)    |
| <b>Marshall Islands</b> | 0.00 (0.00, 0.00)    | 0.00 (0.00, 0.00)    | 0.00 (0.00, 0.00)    | 0.00 (0.00, 0.00)       | 0.00 (0.00, 0.00)       | 0.00 (0.00, 0.00)       |
| <b>Mauritania</b>       | 1.32 (0.83, 1.90)    | 32.38 (20.25, 46.54) | 58.81 (37.13, 84.70) | 2.48 (1.61, 3.53)       | 60.69 (39.30, 86.46)    | 96.33 (62.60, 135.98)   |
| <b>Mauritius</b>        | 0.24 (0.16, 0.35)    | 19.01 (12.30, 27.24) | 17.24 (11.10, 24.57) | 1.86 (1.30, 2.46)       | 146.16 (101.76, 192.74) | 129.09 (90.56, 170.44)  |
| <b>Mexico</b>           | 50.01 (33.33, 69.50) | 39.37 (26.24, 54.71) | 48.23 (31.98, 67.07) | 260.98 (191.44, 327.02) | 205.43 (150.69, 257.41) | 255.19 (187.29, 320.56) |
| <b>Moldova</b>          | 0.63 (0.39, 0.92)    | 15.53 (9.66, 22.71)  | 13.72 (8.48, 20.01)  | 0.71 (0.51, 0.94)       | 17.51 (12.42, 23.01)    | 14.85 (10.67, 19.38)    |
| <b>Mongolia</b>         | 1.04 (0.65, 1.49)    | 35.07 (21.99, 50.37) | 51.89 (32.88, 74.65) | 2.83 (1.30, 4.60)       | 95.77 (44.00, 155.77)   | 115.55 (59.53, 182.08)  |
| <b>Montenegro</b>       | 0.17 (0.11, 0.25)    | 27.41 (17.04, 39.88) | 20.89 (12.93, 30.41) | 0.50 (0.36, 0.65)       | 80.06 (57.23, 103.50)   | 61.29 (44.27, 79.51)    |
| <b>Morocco</b>          | 11.42 (7.35, 16.31)  | 33.22 (21.39, 47.46) | 38.65 (24.66, 55.35) | 42.69 (28.30, 59.15)    | 124.18 (82.33, 172.09)  | 151.44 (98.73, 213.29)  |
| <b>Mozambique</b>       | 3.79 (2.38, 5.51)    | 13.53 (8.51, 19.68)  | 28.99 (18.34, 41.69) | 6.78 (3.59, 10.58)      | 24.23 (12.83, 37.80)    | 40.01 (21.40, 62.78)    |
| <b>Myanmar</b>          | 10.37 (6.58, 14.75)  | 19.20 (12.19, 27.30) | 24.72 (15.88, 35.01) | 61.62 (43.47, 81.51)    | 114.05 (80.47, 150.87)  | 139.84 (99.41, 183.83)  |

|                                 |                      |                      |                      |                         |                         |                         |
|---------------------------------|----------------------|----------------------|----------------------|-------------------------|-------------------------|-------------------------|
| <b>Namibia</b>                  | 0.48 (0.30, 0.68)    | 19.39 (12.30, 27.69) | 34.76 (21.93, 49.98) | 0.91 (0.55, 1.35)       | 37.20 (22.42, 54.94)    | 68.14 (41.46, 101.42)   |
| <b>Nepal</b>                    | 7.76 (5.03, 10.96)   | 27.19 (17.61, 38.40) | 40.74 (25.91, 58.14) | 26.15 (17.54, 36.12)    | 91.60 (61.45, 126.50)   | 130.76 (87.57, 179.62)  |
| <b>Netherlands</b>              | 1.41 (0.93, 2.00)    | 8.20 (5.41, 11.61)   | 5.30 (3.47, 7.47)    | 2.42 (1.73, 3.16)       | 14.10 (10.06, 18.35)    | 8.19 (5.83, 10.64)      |
| <b>New Zealand</b>              | 0.00 (0.00, 0.00)    | 0.00 (0.00, 0.00)    | 0.00 (0.00, 0.00)    | 0.00 (0.00, 0.00)       | 0.00 (0.00, 0.00)       | 0.00 (0.00, 0.00)       |
| <b>Nicaragua</b>                | 1.77 (1.16, 2.46)    | 29.07 (18.97, 40.43) | 40.26 (26.36, 57.18) | 13.96 (9.76, 18.71)     | 229.28 (160.23, 307.36) | 310.15 (217.89, 411.28) |
| <b>Niger</b>                    | 5.20 (3.31, 7.42)    | 26.20 (16.65, 37.37) | 60.33 (38.50, 85.59) | 13.81 (8.60, 20.07)     | 69.55 (43.33, 101.09)   | 105.32 (66.30, 150.45)  |
| <b>Nigeria</b>                  | 43.99 (27.51, 63.27) | 24.11 (15.07, 34.67) | 52.00 (33.07, 74.66) | 41.45 (27.56, 58.05)    | 22.71 (15.10, 31.81)    | 32.30 (21.25, 45.22)    |
| <b>North Korea</b>              | 7.11 (4.68, 9.91)    | 28.27 (18.59, 39.40) | 29.04 (19.01, 40.78) | 20.75 (14.76, 27.05)    | 82.46 (58.68, 107.52)   | 81.68 (58.19, 106.40)   |
| <b>Northern Mariana Islands</b> | 0.00 (0.00, 0.00)    | 2.71 (1.71, 3.93)    | 5.04 (3.25, 7.38)    | 0.01 (0.01, 0.02)       | 11.17 (7.31, 15.58)     | 24.92 (16.91, 34.15)    |
| <b>Norway</b>                   | 0.00 (0.00, 0.00)    | 0.00 (0.00, 0.00)    | 0.00 (0.00, 0.00)    | 0.00 (0.00, 0.00)       | 0.00 (0.00, 0.00)       | 0.00 (0.00, 0.00)       |
| <b>Oman</b>                     | 1.47 (0.95, 2.08)    | 32.74 (21.18, 46.50) | 51.15 (33.37, 71.18) | 1.64 (1.19, 2.10)       | 36.53 (26.50, 46.90)    | 81.73 (59.02, 104.40)   |
| <b>Pakistan</b>                 | 34.42 (21.89, 48.96) | 18.20 (11.58, 25.90) | 28.80 (18.48, 41.01) | 210.88 (125.43, 314.47) | 111.54 (66.35, 166.34)  | 154.47 (89.68, 232.29)  |
| <b>Palestine</b>                | 1.25 (0.78, 1.78)    | 26.71 (16.74, 38.13) | 52.66 (33.84, 74.28) | 4.32 (3.14, 5.52)       | 92.41 (67.13, 118.05)   | 212.38 (153.03, 269.56) |
| <b>Panama</b>                   | 0.28 (0.18, 0.40)    | 7.09 (4.52, 10.09)   | 8.00 (5.19, 11.49)   | 1.05 (0.73, 1.41)       | 26.83 (18.48, 36.00)    | 30.07 (20.90, 40.10)    |
| <b>Papua New Guinea</b>         | 0.07 (0.04, 0.10)    | 0.93 (0.58, 1.36)    | 1.67 (1.06, 2.43)    | 0.52 (0.30, 0.81)       | 6.86 (3.87, 10.63)      | 11.46 (6.63, 17.44)     |
| <b>Paraguay</b>                 | 0.49 (0.31, 0.70)    | 7.36 (4.69, 10.55)   | 10.05 (6.38, 14.56)  | 3.30 (2.33, 4.34)       | 49.62 (34.99, 65.31)    | 67.85 (47.96, 89.29)    |
| <b>Peru</b>                     | 4.64 (2.96, 6.61)    | 14.79 (9.43, 21.04)  | 18.57 (11.82, 26.30) | 24.48 (16.62, 33.12)    | 77.98 (52.94, 105.51)   | 96.60 (65.85, 131.90)   |
| <b>Philippines</b>              | 20.80 (13.13, 29.53) | 20.63 (13.02, 29.29) | 29.10 (18.93, 41.54) | 186.82 (133.90, 240.91) | 185.33 (132.84, 238.99) | 255.18 (182.55, 330.77) |
| <b>Poland</b>                   | 11.96 (7.93, 16.76)  | 30.74 (20.37, 43.07) | 20.94 (13.63, 29.43) | 17.47 (12.68, 22.34)    | 44.89 (32.60, 57.40)    | 30.18 (21.90, 38.44)    |
| <b>Portugal</b>                 | 0.00 (0.00, 0.00)    | 0.00 (0.00, 0.00)    | 0.00 (0.00, 0.00)    | 0.00 (0.00, 0.00)       | 0.00 (0.00, 0.00)       | 0.00 (0.00, 0.00)       |

|                                         |                      |                      |                      |                      |                       |                         |
|-----------------------------------------|----------------------|----------------------|----------------------|----------------------|-----------------------|-------------------------|
|                                         | 0.00)                | 0.00)                | 0.00)                | 0.00)                | 0.00)                 |                         |
| <b>Puerto Rico</b>                      | 0.86 (0.57, 1.22)    | 23.38 (15.40, 32.99) | 17.72 (11.58, 25.08) | 3.16 (2.28, 4.09)    | 85.78 (61.78, 110.89) | 65.23 (46.53, 84.36)    |
| <b>Qatar</b>                            | 0.64 (0.41, 0.91)    | 28.76 (18.45, 41.08) | 43.44 (28.83, 60.48) | 0.60 (0.37, 0.89)    | 27.23 (16.48, 40.22)  | 85.38 (52.42, 125.21)   |
| <b>Romania</b>                          | 4.50 (2.95, 6.27)    | 23.05 (15.11, 32.11) | 14.65 (9.64, 20.51)  | 9.22 (6.64, 11.78)   | 47.22 (34.00, 60.35)  | 30.85 (22.35, 39.37)    |
| <b>Russia</b>                           | 24.25 (14.97, 35.25) | 16.37 (10.11, 23.80) | 12.26 (7.66, 17.92)  | 28.83 (17.30, 42.90) | 19.46 (11.68, 28.96)  | 15.07 (9.09, 22.33)     |
| <b>Rwanda</b>                           | 2.16 (1.34, 3.16)    | 18.59 (11.49, 27.16) | 38.97 (23.92, 56.67) | 3.09 (1.85, 4.56)    | 26.57 (15.90, 39.25)  | 48.01 (27.89, 71.57)    |
| <b>Saint Lucia</b>                      | 0.02 (0.01, 0.02)    | 8.62 (5.35, 12.60)   | 8.46 (5.30, 12.23)   | 0.07 (0.05, 0.09)    | 39.69 (28.34, 51.29)  | 38.79 (27.60, 50.27)    |
| <b>Saint Vincent and the Grenadines</b> | 0.01 (0.01, 0.01)    | 8.60 (5.41, 12.47)   | 9.38 (5.98, 13.62)   | 0.05 (0.04, 0.07)    | 46.42 (32.95, 60.58)  | 49.69 (35.22, 64.45)    |
| <b>Samoa</b>                            | 0.00 (0.00, 0.00)    | 0.00 (0.00, 0.00)    | 0.00 (0.00, 0.00)    | 0.00 (0.00, 0.00)    | 0.00 (0.00, 0.00)     | 0.00 (0.00, 0.00)       |
| <b>Sao Tome and Principe</b>            | 0.02 (0.01, 0.02)    | 8.42 (5.27, 12.30)   | 16.18 (10.16, 23.39) | 0.06 (0.04, 0.08)    | 30.25 (19.95, 42.51)  | 50.89 (34.43, 70.03)    |
| <b>Saudi Arabia</b>                     | 9.55 (6.17, 13.59)   | 30.39 (19.64, 43.22) | 45.30 (29.76, 63.49) | 24.50 (17.61, 31.42) | 77.94 (56.01, 99.95)  | 163.92 (119.09, 209.47) |
| <b>Senegal</b>                          | 4.70 (2.98, 6.76)    | 31.09 (19.73, 44.71) | 64.85 (41.07, 93.06) | 12.48 (8.87, 16.46)  | 82.62 (58.69, 108.93) | 136.81 (98.45, 176.64)  |
| <b>Serbia</b>                           | 2.52 (1.62, 3.55)    | 28.40 (18.33, 40.09) | 18.58 (12.08, 26.25) | 7.15 (5.19, 9.13)    | 80.74 (58.65, 103.06) | 52.76 (38.15, 66.92)    |
| <b>Seychelles</b>                       | 0.01 (0.00, 0.01)    | 5.72 (3.48, 8.36)    | 5.94 (3.76, 8.61)    | 0.05 (0.04, 0.07)    | 53.82 (37.25, 72.00)  | 56.39 (38.89, 75.12)    |
| <b>Sierra Leone</b>                     | 0.87 (0.54, 1.26)    | 13.52 (8.40, 19.57)  | 28.68 (17.81, 41.78) | 2.50 (1.64, 3.50)    | 38.71 (25.34, 54.12)  | 56.96 (38.11, 79.27)    |
| <b>Singapore</b>                        | 0.95 (0.63, 1.33)    | 24.28 (16.15, 33.90) | 19.00 (12.57, 26.55) | 1.73 (1.19, 2.35)    | 44.08 (30.37, 59.92)  | 36.25 (24.74, 49.52)    |
| <b>Slovakia</b>                         | 1.39 (0.89, 1.98)    | 24.98 (15.97, 35.70) | 18.19 (11.63, 26.15) | 2.49 (1.77, 3.23)    | 44.78 (31.88, 58.16)  | 32.63 (23.12, 42.46)    |
| <b>Slovenia</b>                         | 0.51 (0.33, 0.73)    | 24.86 (16.15, 35.49) | 15.15 (9.85, 21.15)  | 0.49 (0.35, 0.64)    | 23.98 (17.15, 31.24)  | 12.93 (9.30, 16.75)     |
| <b>Solomon Islands</b>                  | 0.00 (0.00, 0.00)    | 0.00 (0.00, 0.00)    | 0.00 (0.00, 0.00)    | 0.00 (0.00, 0.00)    | 0.00 (0.00, 0.00)     | 0.00 (0.00, 0.00)       |
| <b>Somalia</b>                          | 1.70 (1.06, 2.46)    | 15.65 (9.79, 22.69)  | 32.99 (20.74, 47.70) | 3.16 (2.08, 4.47)    | 29.12 (19.22, 41.19)  | 51.46 (33.43, 72.91)    |

|                     |                      |                      |                      |                        |                         |                         |
|---------------------|----------------------|----------------------|----------------------|------------------------|-------------------------|-------------------------|
| <b>South Africa</b> | 19.72 (12.80, 27.66) | 36.70 (23.82, 51.49) | 48.91 (31.84, 68.99) | 58.33 (42.65, 73.98)   | 108.58 (79.39, 137.71)  | 137.43 (99.68, 173.95)  |
| <b>South Korea</b>  | 17.38 (11.76, 23.83) | 34.56 (23.38, 47.39) | 25.33 (17.04, 34.81) | 23.55 (15.11, 33.25)   | 46.84 (30.04, 66.12)    | 34.25 (22.30, 47.93)    |
| <b>South Sudan</b>  | 2.99 (1.89, 4.30)    | 24.33 (15.36, 34.97) | 51.75 (32.09, 75.36) | 4.35 (2.72, 6.21)      | 35.39 (22.17, 50.52)    | 59.89 (37.95, 85.45)    |
| <b>Spain</b>        | 0.00 (0.00, 0.00)    | 0.00 (0.00, 0.00)    | 0.00 (0.00, 0.00)    | 0.00 (0.00, 0.00)      | 0.00 (0.00, 0.00)       | 0.00 (0.00, 0.00)       |
| <b>Sri Lanka</b>    | 4.86 (3.15, 6.82)    | 23.41 (15.19, 32.87) | 23.28 (14.92, 33.03) | 22.08 (14.85, 30.20)   | 106.42 (71.55, 145.57)  | 105.07 (70.89, 142.32)  |
| <b>Sudan</b>        | 12.33 (7.95, 17.47)  | 30.53 (19.68, 43.26) | 54.58 (36.28, 75.67) | 39.11 (26.35, 54.08)   | 96.84 (65.23, 133.89)   | 169.37 (111.48, 238.89) |
| <b>Suriname</b>     | 0.07 (0.05, 0.10)    | 13.05 (8.47, 18.56)  | 14.93 (9.48, 21.37)  | 0.47 (0.33, 0.61)      | 85.96 (60.88, 112.08)   | 97.82 (69.19, 128.13)   |
| <b>Swaziland</b>    | 0.27 (0.18, 0.39)    | 21.09 (13.74, 29.99) | 40.62 (26.32, 58.01) | 0.66 (0.34, 1.02)      | 50.88 (26.32, 78.97)    | 97.54 (51.30, 152.07)   |
| <b>Sweden</b>       | 0.00 (0.00, 0.00)    | 0.00 (0.00, 0.00)    | 0.00 (0.00, 0.00)    | 0.00 (0.00, 0.00)      | 0.00 (0.00, 0.00)       | 0.00 (0.00, 0.00)       |
| <b>Switzerland</b>  | 0.57 (0.36, 0.82)    | 6.86 (4.36, 9.91)    | 4.31 (2.76, 6.29)    | 0.70 (0.47, 0.98)      | 8.48 (5.71, 11.87)      | 4.52 (2.97, 6.31)       |
| <b>Syria</b>        | 5.14 (3.24, 7.40)    | 27.61 (17.38, 39.72) | 43.40 (27.65, 62.59) | 11.80 (7.54, 16.82)    | 63.35 (40.48, 90.33)    | 102.17 (57.85, 152.97)  |
| <b>Tajikistan</b>   | 2.03 (1.29, 2.92)    | 23.91 (15.12, 34.36) | 42.03 (26.52, 59.98) | 5.11 (3.56, 6.86)      | 60.10 (41.84, 80.63)    | 75.56 (52.60, 101.68)   |
| <b>Tanzania</b>     | 9.90 (6.17, 14.29)   | 18.55 (11.56, 26.78) | 40.10 (25.68, 57.59) | 19.58 (13.68, 25.94)   | 36.68 (25.63, 48.61)    | 62.52 (43.89, 83.87)    |
| <b>Thailand</b>     | 19.46 (12.54, 27.84) | 28.66 (18.47, 41.01) | 24.40 (15.75, 34.46) | 100.91 (72.11, 129.44) | 148.63 (106.22, 190.66) | 123.20 (88.60, 158.83)  |
| <b>The Bahamas</b>  | 0.02 (0.02, 0.04)    | 6.44 (4.06, 9.24)    | 6.61 (4.24, 9.53)    | 0.14 (0.10, 0.18)      | 35.02 (24.58, 45.95)    | 34.98 (24.53, 46.16)    |
| <b>The Gambia</b>   | 0.49 (0.30, 0.70)    | 24.38 (15.15, 35.15) | 58.57 (36.46, 83.32) | 1.07 (0.72, 1.46)      | 53.54 (36.11, 73.20)    | 94.33 (64.94, 127.22)   |
| <b>Timor-Leste</b>  | 0.06 (0.04, 0.08)    | 4.88 (3.09, 7.11)    | 8.33 (5.23, 12.16)   | 0.26 (0.15, 0.38)      | 21.44 (12.65, 32.18)    | 33.00 (19.72, 49.20)    |
| <b>Togo</b>         | 2.07 (1.31, 2.98)    | 28.36 (17.92, 40.75) | 56.83 (36.28, 81.33) | 4.67 (2.87, 6.81)      | 64.00 (39.31, 93.21)    | 101.35 (62.08, 148.63)  |
| <b>Tonga</b>        | 0.00 (0.00, 0.00)    | 0.00 (0.00, 0.00)    | 0.00 (0.00, 0.00)    | 0.00 (0.00, 0.00)      | 0.00 (0.00, 0.00)       | 0.00 (0.00, 0.00)       |
| <b>Trinidad and</b> | 0.13 (0.09, 0.17)    | 9.87 (6.43, 13.31)   | 9.21 (5.95, 12.47)   | 0.66 (0.47, 0.85)      | 48.28 (34.29, 62.27)    | 43.77 (30.97, 56.85)    |

|                                                                   |                      |                      |                      |                       |                        |                         |
|-------------------------------------------------------------------|----------------------|----------------------|----------------------|-----------------------|------------------------|-------------------------|
| <b>Tobago</b>                                                     | 0.19)                | 14.19)               | 13.14)               | 0.86)                 | 62.87)                 |                         |
| <b>Tunisia</b>                                                    | 5.07 (3.34, 7.12)    | 45.09 (29.67, 63.28) | 46.29 (30.89, 65.29) | 12.17 (7.73, 17.42)   | 108.15 (68.69, 154.83) | 119.91 (75.89, 170.51)  |
| <b>Turkey</b>                                                     | 45.45 (29.94, 63.66) | 57.96 (38.18, 81.17) | 61.97 (41.33, 87.17) | 57.26 (39.37, 77.22)  | 73.02 (50.20, 98.47)   | 81.84 (56.78, 110.38)   |
| <b>Turkmenistan</b>                                               | 1.83 (1.16, 2.62)    | 33.95 (21.59, 48.71) | 48.87 (30.36, 70.58) | 6.24 (4.59, 7.85)     | 115.93 (85.24, 145.79) | 142.94 (104.59, 179.26) |
| <b>Uganda</b>                                                     | 6.61 (4.18, 9.36)    | 16.88 (10.68, 23.90) | 43.89 (27.79, 62.74) | 13.81 (9.65, 18.39)   | 35.28 (24.65, 46.98)   | 68.61 (48.46, 90.65)    |
| <b>Ukraine</b>                                                    | 7.71 (4.83, 11.11)   | 16.57 (10.39, 23.89) | 11.49 (7.25, 16.69)  | 7.50 (4.90, 10.53)    | 16.13 (10.54, 22.64)   | 12.08 (7.91, 17.11)     |
| <b>United Arab Emirates</b>                                       | 3.57 (2.31, 5.03)    | 39.03 (25.29, 54.98) | 53.70 (34.58, 75.47) | 8.00 (4.68, 11.84)    | 87.50 (51.13, 129.41)  | 163.20 (100.84, 238.05) |
| <b>United Kingdom</b>                                             | 2.83 (1.83, 4.04)    | 4.41 (2.85, 6.29)    | 2.86 (1.84, 4.08)    | 3.50 (2.51, 4.47)     | 5.45 (3.90, 6.95)      | 3.25 (2.33, 4.16)       |
| <b>United States</b>                                              | 0.00 (0.00, 0.00)    | 0.00 (0.00, 0.00)    | 0.00 (0.00, 0.00)    | 0.00 (0.00, 0.00)     | 0.00 (0.00, 0.00)      | 0.00 (0.00, 0.00)       |
| <b>Uruguay</b>                                                    | 0.13 (0.08, 0.19)    | 3.82 (2.45, 5.46)    | 2.89 (1.87, 4.11)    | 0.28 (0.20, 0.37)     | 8.20 (5.80, 10.65)     | 6.08 (4.30, 7.89)       |
| <b>Uzbekistan</b>                                                 | 8.33 (5.38, 11.72)   | 27.84 (17.96, 39.15) | 38.59 (24.71, 54.94) | 28.11 (20.38, 36.24)  | 93.89 (68.06, 121.04)  | 106.63 (77.03, 136.37)  |
| <b>Vanuatu</b>                                                    | 0.00 (0.00, 0.00)    | 0.00 (0.00, 0.00)    | 0.00 (0.00, 0.00)    | 0.00 (0.00, 0.00)     | 0.00 (0.00, 0.00)      | 0.00 (0.00, 0.00)       |
| <b>Venezuela</b>                                                  | 7.91 (5.20, 11.19)   | 25.44 (16.70, 35.98) | 31.92 (20.84, 45.23) | 40.84 (28.56, 54.04)  | 131.29 (91.82, 173.73) | 161.68 (113.49, 214.22) |
| <b>Vietnam</b>                                                    | 14.83 (9.73, 20.94)  | 15.86 (10.41, 22.41) | 17.29 (11.43, 24.17) | 88.96 (63.22, 116.91) | 95.17 (67.64, 125.08)  | 105.85 (75.39, 138.02)  |
| <b>Virgin Islands, U.S.</b>                                       | 0.02 (0.01, 0.02)    | 15.19 (9.45, 22.03)  | 10.49 (6.59, 15.10)  | 0.08 (0.06, 0.11)     | 76.75 (53.39, 102.08)  | 51.16 (35.43, 68.56)    |
| <b>Yemen</b>                                                      | 7.74 (4.93, 11.13)   | 28.77 (18.33, 41.37) | 59.85 (38.83, 84.91) | 22.09 (13.44, 32.34)  | 82.07 (49.93, 120.17)  | 175.22 (107.99, 256.20) |
| <b>Zambia</b>                                                     | 3.18 (2.01, 4.54)    | 19.56 (12.36, 27.95) | 43.73 (27.72, 62.35) | 7.69 (5.13, 10.63)    | 47.32 (31.59, 65.40)   | 86.42 (57.46, 119.13)   |
| <b>Zimbabwe</b>                                                   | 3.53 (2.25, 5.09)    | 22.69 (14.45, 32.70) | 48.08 (30.43, 68.21) | 10.03 (6.54, 14.17)   | 64.40 (41.97, 90.99)   | 137.14 (89.08, 194.76)  |
| <b>Years living with disability, YLD; Years of life lost, YLL</b> |                      |                      |                      |                       |                        |                         |

For peer review only

1  
2  
3  
4  
5  
6  
7  
8  
9  
10  
11  
12  
13  
14  
15  
16  
17  
18  
19  
20  
21  
22  
23  
24  
25  
26  
27  
28  
29  
30  
31  
32  
33  
34  
35  
36  
37  
38  
39  
40  
41  
42  
43  
44  
45  
46  
47

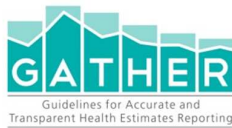

## Checklist of information that should be included in new reports of global health estimates

| Item #                                                                                                | Checklist item                                                                                                                                                                                                                                                                                                                                                                            | Reported on page #                                       |
|-------------------------------------------------------------------------------------------------------|-------------------------------------------------------------------------------------------------------------------------------------------------------------------------------------------------------------------------------------------------------------------------------------------------------------------------------------------------------------------------------------------|----------------------------------------------------------|
| <b>Objectives and funding</b>                                                                         |                                                                                                                                                                                                                                                                                                                                                                                           |                                                          |
| 1                                                                                                     | Define the indicator(s), populations (including age, sex, and geographic entities), and time period(s) for which estimates were made.                                                                                                                                                                                                                                                     | Abstract, 3-4                                            |
| 2                                                                                                     | List the funding sources for the work.                                                                                                                                                                                                                                                                                                                                                    | 16                                                       |
| <b>Data Inputs</b>                                                                                    |                                                                                                                                                                                                                                                                                                                                                                                           |                                                          |
| <i>For all data inputs from multiple sources that are synthesized as part of the study:</i>           |                                                                                                                                                                                                                                                                                                                                                                                           |                                                          |
| 3                                                                                                     | Describe how the data were identified and how the data were accessed.                                                                                                                                                                                                                                                                                                                     | 3-4                                                      |
| 4                                                                                                     | Specify the inclusion and exclusion criteria. Identify all ad-hoc exclusions.                                                                                                                                                                                                                                                                                                             | 3-4                                                      |
| 5                                                                                                     | Provide information on all included data sources and their main characteristics. For each data source used, report reference information or contact name/institution, population represented, data collection method, year(s) of data collection, sex and age range, diagnostic criteria or measurement method, and sample size, as relevant.                                             | 3-4                                                      |
| 6                                                                                                     | Identify and describe any categories of input data that have potentially important biases (e.g., based on characteristics listed in item 5).                                                                                                                                                                                                                                              | 3-4, 14-15                                               |
| <i>For data inputs that contribute to the analysis but were not synthesized as part of the study:</i> |                                                                                                                                                                                                                                                                                                                                                                                           |                                                          |
| 7                                                                                                     | Describe and give sources for any other data inputs.                                                                                                                                                                                                                                                                                                                                      | 3-4                                                      |
| <i>For all data inputs:</i>                                                                           |                                                                                                                                                                                                                                                                                                                                                                                           |                                                          |
| 8                                                                                                     | Provide all data inputs in a file format from which data can be efficiently extracted (e.g., a spreadsheet rather than a PDF), including all relevant meta-data listed in item 5. For any data inputs that cannot be shared because of ethical or legal reasons, such as third-party ownership, provide a contact name or the name of the institution that retains the right to the data. | All data is publicly available. References are provided. |
| <b>Data analysis</b>                                                                                  |                                                                                                                                                                                                                                                                                                                                                                                           |                                                          |
| 9                                                                                                     | Provide a conceptual overview of the data analysis method. A diagram may be helpful.                                                                                                                                                                                                                                                                                                      | 7                                                        |
| 10                                                                                                    | Provide a detailed description of all steps of the analysis, including mathematical formulae. This description should cover, as relevant, data cleaning, data pre-processing, data adjustments and weighting of data sources, and mathematical or statistical model(s).                                                                                                                   | 4-8                                                      |
| 11                                                                                                    | Describe how candidate models were evaluated and how the final model(s) were selected.                                                                                                                                                                                                                                                                                                    | N/A                                                      |
| 12                                                                                                    | Provide the results of an evaluation of model performance, if done, as well as the results of any relevant sensitivity analysis.                                                                                                                                                                                                                                                          | N/A                                                      |
| 13                                                                                                    | Describe methods for calculating uncertainty of the estimates. State which sources of uncertainty were, and were not, accounted for in the uncertainty analysis.                                                                                                                                                                                                                          | 7                                                        |
| 14                                                                                                    | State how analytic or statistical source code used to generate estimates can be accessed.                                                                                                                                                                                                                                                                                                 | N/A                                                      |
| <b>Results and Discussion</b>                                                                         |                                                                                                                                                                                                                                                                                                                                                                                           |                                                          |
| 15                                                                                                    | Provide published estimates in a file format from which data can be efficiently extracted.                                                                                                                                                                                                                                                                                                | Supplemental table 1-5                                   |
| 16                                                                                                    | Report a quantitative measure of the uncertainty of the estimates (e.g. uncertainty intervals).                                                                                                                                                                                                                                                                                           | All estimates come with 95% Uncertainty Intervals        |
| 17                                                                                                    | Interpret results in light of existing evidence. If updating a previous set of estimates, describe the reasons for changes in estimates.                                                                                                                                                                                                                                                  | 12-15                                                    |



|    |                                                                                                                                                          |       |
|----|----------------------------------------------------------------------------------------------------------------------------------------------------------|-------|
| 18 | Discuss limitations of the estimates. Include a discussion of any modelling assumptions or data limitations that affect interpretation of the estimates. | 15-16 |
|----|----------------------------------------------------------------------------------------------------------------------------------------------------------|-------|

*This checklist should be used in conjunction with the GATHER statement and Explanation and Elaboration document, found on [gather-statement.org](http://gather-statement.org)*

For peer review only

# BMJ Open

## Estimates of the 2016 Global Burden of Kidney Disease Attributable to Ambient Fine Particulate Matter Air Pollution

|                                 |                                                                                                                                                                                                                                                                                                                                                                                                                                                                                                                                                                                                                                                                                                                                        |
|---------------------------------|----------------------------------------------------------------------------------------------------------------------------------------------------------------------------------------------------------------------------------------------------------------------------------------------------------------------------------------------------------------------------------------------------------------------------------------------------------------------------------------------------------------------------------------------------------------------------------------------------------------------------------------------------------------------------------------------------------------------------------------|
| Journal:                        | <i>BMJ Open</i>                                                                                                                                                                                                                                                                                                                                                                                                                                                                                                                                                                                                                                                                                                                        |
| Manuscript ID                   | bmjopen-2018-022450.R1                                                                                                                                                                                                                                                                                                                                                                                                                                                                                                                                                                                                                                                                                                                 |
| Article Type:                   | Research                                                                                                                                                                                                                                                                                                                                                                                                                                                                                                                                                                                                                                                                                                                               |
| Date Submitted by the Author:   | 06-Nov-2018                                                                                                                                                                                                                                                                                                                                                                                                                                                                                                                                                                                                                                                                                                                            |
| Complete List of Authors:       | Bowe, Benjamin; VA Saint Louis Health Care System, Clinical Epidemiology Center<br>Xie, Yan; VA Saint Louis Health Care System, Clinical Epidemiology Center<br>Li, Tingting; VA Saint Louis Health Care System, Clinical Epidemiology Center; Washington University in Saint Louis School of Medicine, Internal Medicine<br>Yan, Yan; VA Saint Louis Health Care System, Clinical Epidemiology Center; Washington University in Saint Louis School of Medicine, Public Health Sciences<br>Xian, Hong; VA Saint Louis Health Care System, Clinical Epidemiology Center; Saint Louis University, School of Public Health, Department of Biostatistics<br>Al-Aly, Ziyad; VA Saint Louis Health Care System, Clinical Epidemiology Center |
| <b>Primary Subject Heading</b>: | Global health                                                                                                                                                                                                                                                                                                                                                                                                                                                                                                                                                                                                                                                                                                                          |
| Secondary Subject Heading:      | Epidemiology, Global health, Renal medicine, Public health, Occupational and environmental medicine                                                                                                                                                                                                                                                                                                                                                                                                                                                                                                                                                                                                                                    |
| Keywords:                       | Nephrology < INTERNAL MEDICINE, Chronic renal failure < NEPHROLOGY, PUBLIC HEALTH                                                                                                                                                                                                                                                                                                                                                                                                                                                                                                                                                                                                                                                      |
|                                 |                                                                                                                                                                                                                                                                                                                                                                                                                                                                                                                                                                                                                                                                                                                                        |

SCHOLARONE™  
Manuscripts

1  
2  
3  
4  
5  
6  
7  
8  
9  
10  
11  
12  
13  
14  
15  
16  
17  
18  
19  
20  
21  
22  
23  
24  
25  
26  
27  
28  
29  
30  
31  
32  
33  
34  
35  
36  
37  
38  
39  
40  
41  
42  
43  
44  
45  
46  
47  
48  
49  
50  
51  
52  
53  
54  
55  
56  
57  
58  
59  
60

## Estimates of the 2016 Global Burden of Kidney Disease Attributable to Ambient Fine Particulate Matter Air Pollution

Benjamin Bowe<sup>1</sup>, Yan Xie<sup>1</sup>, Tingting Li<sup>1,2</sup>, Yan Yan<sup>1,3</sup>, Hong Xian<sup>1,4</sup>, and Ziyad Al-Aly<sup>1,2,5,6</sup>.

<sup>1</sup>Clinical Epidemiology Center, Research and Education Service, VA Saint Louis Health Care System, Saint Louis, Missouri

<sup>2</sup>Department of Medicine, Washington University School of Medicine, Saint Louis, Missouri

<sup>3</sup>Division of Public Health Sciences, Department of Surgery, Washington University School of Medicine, Saint Louis, Missouri

<sup>4</sup>Department of Epidemiology and Biostatistics, College for Public Health and Social Justice, Saint Louis University, Saint Louis, Missouri

<sup>5</sup>Nephrology Section, Medicine Service, VA Saint Louis Health Care System, Saint Louis, Missouri

<sup>6</sup>Institute for Public Health, Washington University in Saint Louis, Saint Louis, Missouri

**Running title:** Global Burden of Kidney Disease Attributable to Air Pollution

**Word count for abstract: 300**

**Word count for text: 3500**

**Corresponding Author:**

Ziyad Al-Aly, M.D.

VA Saint Louis Health Care System

915 North Grand Boulevard, 151-JC

Saint Louis, MO 63106

Telephone: (314) 289-6333

E-mail: [zalaly@gmail.com](mailto:zalaly@gmail.com)

**Abstract:**

**Objective:** To quantitate the 2016 global and national burden of chronic kidney disease (CKD) attributable to ambient fine particulate matter air pollution (PM<sub>2.5</sub>).

**Design:** We used the Global Burden of Disease (GBD) study data and methodologies to estimate the 2016 burden of CKD attributable to PM<sub>2.5</sub> in 194 countries and territories. Population weighted PM<sub>2.5</sub> levels and incident rates of CKD for each country were curated from the GBD study publicly available data sources.

**Setting:** GBD global and national data on PM<sub>2.5</sub> and CKD

**Participants:** 194 countries and territories.

**Main outcome measures:** We estimated the attributable burden of disease (ABD), years living with disability (YLD), years of life lost (YLL), and disability-adjusted life-years (DALYs).

**Results:** The 2016 global burden of incident CKD attributable to PM<sub>2.5</sub> was 6,950,514 (95% Uncertainty Interval: 5,061,533-8,914,745). Global YLD, YLL, and DALYs of CKD attributable to PM<sub>2.5</sub> were 2,849,311 (1,875,219-3,983,941), 8,587,735 (6,355,784-10,772,239), and 11,445,397 (8,380,246-14,554,091), respectively. Age-standardized ABD, YLL, YLD, and DALY rates varied substantially among geographies. Populations in Mesoamerica, Northern Africa, several countries in the Eastern Mediterranean region, Afghanistan, Pakistan, India, and several countries in Southeast Asia were amongst those with highest age-standardized DALY rates. For example, age-standardized DALYs per 100,000 were 543.35 (391.16-707.96) in El Salvador, 455.29 (332.51-577.97) in Mexico, 408.41 (283.82-551.84) in Guatemala, 238.25 (173.90-303.98) in India, and 178.26 (125.31-238.47) in Sri Lanka, compared to 5.52 (0.82-11.48) in Sweden, 6.46 (0.00-14.49) in Australia, and 12.13 (4.95-21.82) in Canada. Frontier analyses showed that Mesoamerican countries had significantly higher CKD DALY rates relative to other countries with comparable socio-demographic development.

**Conclusions:** Our results demonstrate that the global toll of CKD attributable to ambient air pollution is significant, and identify several endemic geographies where air pollution may be a significant driver of CKD burden. Air pollution may need to be considered in the discussion of the global epidemiology of CKD.

**Strengths and limitation of this study:**

- The study leveraged the availability of the Global Burden of Disease study data which is the most comprehensive compilation and analysis of global health information available.
- The study quantitated the burden of CKD attributable to air pollution using the combined measure of disability-adjusted-life-years (DALYs) which comprehensively captures the years of healthy life lost due to dying prematurely and to the years living with disability.
- For each estimate reported in this study, we also provide a measure of uncertainty (Uncertainty Intervals) to reflect how much is known, but more importantly how much is not known.
- The burden was quantitated at the country level, the study does not provide subnational estimates of CKD burden.
- Global burden of disease estimates while considered robust and reliable, are necessarily limited by the quality of the available data.

## Introduction:

Several studies described substantial geographic variation in the burden of chronic kidney disease (CKD) that cannot be explained by traditional drivers including diabetes, and hypertension[1-4]. It was suggested that other risk factors including environmental pollution may explain these geographic variations[5]. We recently characterized fine particulate matter of  $<2.5 \mu\text{m}$  in aerodynamic diameter ( $\text{PM}_{2.5}$ ) as a novel risk factor for development and progression of kidney disease and described a linear relationship between exposure to levels of  $\text{PM}_{2.5}$  and risk of incident CKD, kidney disease progression, and end stage renal disease[6].

The global burden of kidney disease attributable to ambient air pollution has not been previously described. A quantitative assessment of the global burden of kidney disease attributable to air pollution might explain some of the geographic variation in burden of kidney disease, help identify endemic areas, and contribute to the global and national discussions about the effect of environmental pollution on non-communicable disease in general, and more specifically on the potential impact of air pollution on the global epidemiology of CKD. In this work, we used the Global Burden of Disease (GBD) study methodologies to estimate the burden of CKD attributable to fine particulate matter air pollution in 194 countries and territories using the following measures: attributable burden of disease (ABD), years living with disability (YLD), years of life lost (YLL), and disability-adjusted life years (DALYs).

## Methods:

### Global Data Sources:

National  $\text{PM}_{2.5}$  exposure levels were obtained from publicly available 2016 Global Burden of Disease data (GBD)[7-9]. The GBD  $\text{PM}_{2.5}$  values are derived from the integration of satellite data, surface measurements, geographic data, and a chemical transport model, at a 1-degree (approximately 11 by 11 km at the equator) resolution, and then aggregated to national level population weighted means to produce a national exposure estimate[7 8]. Estimates of global and national incident rates, YLDs, YLLs, DALYs of chronic kidney disease, and their uncertainty levels were obtained from the publicly available 2016 GBD[10 11]. The GBD aims to use all accessible information on disease occurrence, natural history, and severity that meets inclusion criteria, drawing on a large network collaborators for subject matter expertise on disease and injury to generate

internally consistent, comprehensive global health statistics on the burden of disease[12]. GBD uses an integrative Bayesian meta-regression method which estimates a generalized negative binomial model for all epidemiological data through DisMod-MR 2.1 to compute GBD estimates of disease burden including YLDs, YLLs, and DALYs[12]. Estimates are generated using hierarchical modeling methodology that accounts for temporal, geospatial, sex, age, and cause specific variance to establish attributable burden of kidney disease across all levels of the GBD framework[10 13-16]. Key to GBD estimates are the propagation of uncertainty through the modeling process, which incorporates uncertainty due to diversity in data sources, sparsity of data for some parts of the world, modeling choices, and other factors which impact estimation such as the determination of disability weights. Detailed descriptions of overall GBD 2016 methodologies and specific CKD methodology have been provided elsewhere[10 12-17]. Population size was obtained from the GBD Population Estimates dataset[18]. Country income classifications were obtained from the World Bank[19].

### **PM<sub>2.5</sub> Risk Estimation:**

PM<sub>2.5</sub> risk estimation was obtained from prior work assessing the association of PM<sub>2.5</sub> with kidney disease outcomes[6]. Department of Veterans Affairs datasets were linked with the Center for Disease Control's (CDC) National Environmental Public Health Tracking Network annual particulate matter estimates for the contiguous United States, which originates from Community Multiscale Air Quality (CMAQ) modeled output[20]. Time dependent adjusted Cox Proportional Hazard survival models, where cohort participants' exposure was updated annually and upon movement in residence, were used to investigate the association between PM<sub>2.5</sub> and time until incident eGFR <60 ml/min/1.73m<sup>2</sup>. Models were adjusted for age, race, sex, cancer, cardiovascular disease, chronic lung disease, diabetes mellitus, hyperlipidemia, hypertension, eGFR at time of cohort entry, body mass index, smoking status, angiotensin-converting enzyme inhibitor/angiotensin receptor blocker use, county population density, number of outpatient eGFR measurements, number of hospitalizations, and county percent in poverty. Restricted cubic spline analyses of PM<sub>2.5</sub> suggested no deviation from linearity in the range of PM<sub>2.5</sub> in the study (5.0-22.1 µg/m<sup>3</sup>). Alternate analyses using time zero exposure values, and using NASA data as an alternate exposure source produced consistent results[21 22]. Ambient sodium levels were investigated as a negative control, where there existed no biologic bases to support an association with risk of incident CKD. Results for every interquartile range (the distance between the 25<sup>th</sup> and 75<sup>th</sup> percentile;



0.046  $\mu\text{g}/\text{m}^3$ ) increase in sodium showed a vanishingly weak association, 0.99 (0.99-0.99). Results were consistent in sensitivity analyses that used ground level measures only, and that assessed potential confounding by shared regional characteristics[6]. To estimate risk in each country, we relied on the  $\text{PM}_{2.5}$  pollution and risk relationship characterized in the prior study described above[23] where  $\text{PM}_{2.5}$  levels ranged from 5.0 to 22.1  $\mu\text{g}/\text{m}^3$  [23]. In this study, we took a conservative approach where we considered annual average  $\text{PM}_{2.5}$  exposure greater than 22.1  $\mu\text{g}/\text{m}^3$  to contribute the same amount of risk as an exposure of 22.1  $\mu\text{g}/\text{m}^3$  [24]. This approach is supported by findings from GBD and several other studies where integrated exposure response functions suggest that risk of adverse health outcomes of  $\text{PM}_{2.5}$  pollution levels off (follows a near plateau morphology) at  $\text{PM}_{2.5}$  concentrations exceeding 20-25  $\mu\text{g}/\text{m}^3$  [7 8 25].

### Population Attributable Fraction (PAF) and Attributable Burden of Disease (ABD):

The PAF of CKD due to  $\text{PM}_{2.5}$  exposure above the theoretical minimum risk exposure level (TMREL) was calculated using an adapted Global Burden of Disease equation<sup>14</sup>. This PAF can be interpreted as the proportion of incident CKD attributable to  $\text{PM}_{2.5}$  exposure that exceeds the TMREL. The Proportional Hazards based equation for PAF in a country is:

$$PAF = \frac{HR(x) - HR(TMREL)}{HR(x)}$$

where  $HR(x)$  is the hazard ratio for  $\text{PM}_{2.5}$  at the national exposure level, and  $HR(TMREL)$  is the hazard ratio for  $\text{PM}_{2.5}$  at the TMREL. The TMREL was defined according to the Global Burden of Disease (GBD) study methodologies[8 26 27]. The TMREL was assigned as a uniform distribution of  $\text{PM}_{2.5}$  from 2.4 to 5.9  $\mu\text{g}/\text{m}^3$ , which represents exposure values between the minimum and fifth percentiles of exposure distributions from outdoor air pollution cohort studies included in the GBD analyses[8 26 27]. Levels under the TMREL were treated as contributing no risk[8]. Results were repeated utilizing the World Health Organization (WHO) Air Quality Guidelines for annual average of  $\text{PM}_{2.5}$  concentration of 10  $\mu\text{g}/\text{m}^3$  as the TMREL[28].

Burden of CKD attributable to  $\text{PM}_{2.5}$  above the TMREL, as the number of incident CKD per year attributable to  $\text{PM}_{2.5}$  above the TMREL, was calculated using estimates from the 2016 GBD[13], from the equation:

$$ABD = PAF * IR * population$$

where PAF is the population attributable fraction, IR is the incident rate of CKD, and population those in which the burden is being assessed[2]. Results were repeated utilizing the WHO TMREL.

### **Years Living with Disability (YLD), Years of Life Lost (YLL), and Disability Adjusted Life years (DALYs):**

YLD, YLL, and DALY values were estimated by multiplying the CKD specific GBD values of the corresponding burden measure by the PAF[13 17], resulting in YLD, YLL, and DALY values due to CKD attributable to PM<sub>2.5</sub>.

YLD, YLL, and DALY estimates due to chronic kidney disease were obtained from the GBD results tool[10 11].

The basis of their calculation is presented below, further information has been described elsewhere[13 17].

Results were repeated utilizing the WHO TMREL.

YLD due to CKD is calculated as:

$$YLD = I * DW * R$$

where I is the incident cases of CKD in the population, DW is the disability weight for CKD representative of the severity of its impact on a person's life (0, no impact, to 1, the same as death), and R is the average duration of CKD until remission or death. YLD due to CKD is a measure of the burden placed on a population due to the ill-effects of living with CKD[29].

Years of Life Lost due to CKD is calculated using the equation:

$$YLL = N * L$$

where N is the number of deaths due to CKD, and L is the difference between age of death and average life expectancy due to CKD. YLL due to CKD is a measure of the burden placed on a population due to dying prematurely from CKD. Estimates of the difference between average life expectancy and age of death from CKD come from a GBD set of age and location-year specific life tables[10 13-16].

Disability Adjusted Life Years due to CKD is calculated using the equation:

$$DALY = YLD + YLL$$

The DALY due to CKD is a summary measure of YLD and YLL and represents the total years of healthy life lost due to ill-health, disability, or early death due to CKD.

### Measure Estimation and Uncertainty:

In order to incorporate the uncertainty in measurements used in our estimation, all measures were generated from a distribution of 10,000 predictions, where the median (UI: 2.5<sup>th</sup>-97.5<sup>th</sup> percentile) are reported. Predictions incorporated uncertainty by randomly sampling from, unless otherwise specified, constructed normal distributions of the relevant measures. Uncertainty was derived from the TMREL distribution, the standard error of the PM<sub>2.5</sub> beta estimate, and the uncertainty of the incident rates, YLD, YLL and DALY from the GBD data. While accounting for variability in measures, measures sampled under zero were set to zero. Values of zero thus represent instances of estimated zero burden, reflective of areas where the corresponding PM<sub>2.5</sub> levels are below the TMREL distribution, or where uncertainty was enough to result in such estimates. Maps of age-standardized rates are presented. All analyses were performed in SAS Enterprise Guide version 7.1 (SAS Institute, Cary, NC). Maps were generated using Arc Map 10 (ESRI, Redlands, CA). The circular layout image was generated using the Circos software package[30].

### Frontier Analysis:

Frontier analysis was conducted as a quantitative methodology to identify the lowest potentially achievable age standardized DALYs on the basis of development status as measured by the Socio-demographic Index (SDI). SDI is a summary measure of a country or territory's socio-demographic development; it is a composite measure of average income per person, educational attainment, and total fertility rate in any given country. The minimum possible SDI is zero, maximum is 100; it is comparable across geography and over time[31]. The DALYs frontier delineates the minimum DALY that could be achieved for every geography (country or territory) given its SDI. Distance from the frontier is termed effective difference; if a country or territory exhibits a large effective difference from the frontier given its SDI, then this likely suggests unrealized opportunities for gains or improvement (reduction in DALYs) that should be possible based on the country or territory's state on the development spectrum. A data envelope analysis, which allows for non-linear frontiers, utilizing the free disposal hull method was developed to produce a frontier for age adjusted DALYs[31-33]. In order to account for uncertainty, we used 1,000 bootstrapped samples of the data, randomly sampling with replacement from all countries and territories. LOESS regression was then used on this result to produce a smoothed frontier[31]. Super-efficient countries were excluded, to remove the influence of outliers, in the generation of the

1 frontier[31]. Absolute distances from the frontier of each country are reported as effective difference, where any  
2 countries with lower DALYs than the frontier were assigned a zero distance.  
3  
4  
5

6 In order to account the effect of variation in prevalence of primary drivers of CKD (hypertension and diabetes)  
7 on differences in overall DALY rates, we repeated the frontier analysis following a decomposition analysis to  
8 generate risk deleted cause-specific age standardized DALY rates of CKD attributable to PM<sub>2.5</sub>[17], where risks  
9 deleted were hypertension and diabetes. Diabetes and Hypertension cause specific CKD rates were obtained  
10 from the 2016 GBD, which were then subtracted from overall rates and then multiplied by the PAF[11]. The risk  
11 deleted DALY can be conceptualized by the formula:  
12  
13  
14  
15  
16  
17

$$DALY_O = DALY_{DHO} * (1 - PAF_{DH})$$

18  
19  
20  
21 Where DALY<sub>O</sub> is the DALY due to other causes, DALY<sub>DHO</sub> is the DALY due to all three causes, and PAF<sub>DH</sub> is  
22 the population attributable fraction due to diabetes and hypertension.  
23  
24  
25  
26  
27

#### 28 **Patient involvement:**

29 No patients were involved in developing the aims, design, or implementation of this study. No patients were  
30 involved in the interpretation of study results, or write up of the manuscript.  
31  
32  
33  
34  
35

#### 36 **Results:**

##### 37 **Global burden of kidney disease attributable to air pollution:**

38 In 2016, the global annual burden of incident CKD attributable to elevated PM<sub>2.5</sub> was, in 1000s, 6,950.51 (95%  
39 Uncertainty Interval: 5,061.53-8,914.74). ABD rate per 100,000 people was 94.29 (68.67, 120.94), and age  
40 standardized ABD rate per 100,000 was 101.39 (74.49, 129.69) (table 1).  
41  
42  
43  
44  
45  
46  
47

48 The 2016 global YLD, YLL, and DALYs of CKD attributable to elevated PM<sub>2.5</sub> are reported in table 2 as  
49 absolute values in 1000s, rates per 100,000 population, and age standardized rates per 100,000. Age  
50 standardized rates for YLD, YLL, and DALYs were 40.97 (26.84, 57.11), 122.71 (90.36, 153.52), and 163.69  
51 (120.58, 207.28), respectively (table 2).  
52  
53  
54  
55  
56  
57  
58  
59  
60

### **Burden of kidney disease attributable to air pollution at the national level:**

ABD, YLD, YLL, and DALYs reported as absolute values, as rates per 100,000 population, and as age standardized rates per 100,000 population for 10 most populated countries (table 1 and 2), and for 194 countries and territories are provided in supplemental table 1 and supplemental table 2.

Among the 10 most populated countries in the world, India followed by China had the highest attributable burden of incident CKD due to air pollution globally (ABD=1,092.52, UI=791.38-1407.28, and 766.73, 558.72-985.14, in 1000s, respectively). India also outranked China in estimates standardized by population size, and age distribution (table 1). Age standardized ABD in the 10 most populated countries showed Nigeria, Bangladesh, and India having high burden exceeding 100 incident cases of CKD per 100,000 population (table 1). Age standardized ABD per 100,000 population varied substantially among geographies; where it was highest in Guinea-Bissau, El Salvador, Senegal, Togo, Benin, Mauritania, Chad, Ghana, Niger, and Mali (supplemental table 1, figure 1). Mapping the geographic distribution of age standardized ABD rates showed high burden in Mesoamerica, several countries in Central and South Africa, Mongolia, and several countries in the Far East and the Eastern Mediterranean region (figure 1). Countries with the lowest age standardized ABD per 100,000 population included Canada, Greenland, several countries in Scandinavia, Brunei, New Zealand, and Australia (supplemental table 1, figure 1).

### **Years Living with Disability:**

Estimates for YLD in absolute terms, rates per 100,000 population, and age standardized YLL rates are provided in table 2 for the 10 most populated countries, and in supplemental table 2 for 194 countries and territories. Among the 10 most populated countries, Nigeria had the highest age standardized YLD rate per 100,000 population (YLD=71.93, UI=45.61-103.27), followed by Bangladesh (45.58, 28.89-64.56), and then India (45.40, 29.19-64.54). Among all countries, Iraq, Afghanistan, Guinea-Bissau, Senegal, Chad, Turkey, Mali, Niger, and Yemen had the highest age standardized YLD rate per 100,000 population (supplemental table 2, figure 2).

### Years of Life Lost:

Estimates for YLL in absolute numbers, rates per 100,000 population, and age standardized rates per 100,000 population for 10 most populated countries and for 194 countries and territories are provided in table 2 and supplemental table 2, respectively. Among the 10 most populated countries, Pakistan had the highest age standardized YLL per 100,000 population (YLL=215.59, UI=123.95-322.52), followed by India (192.55, 138.73-249.04), and then Bangladesh (137.57, 98.14-179.69). Among all countries and territories, Afghanistan, El Salvador, Nicaragua, Mexico, Honduras, Philippines, Guatemala, Iraq, Palestine, and Belize had the highest age standardized YLL per 100,000 population (supplemental table 2, figure 3).

### Disability-Adjusted Life-Years:

Among the 10 most populated countries, India had the highest DALY (DALY=2,502.15, UI=1,827.96-3,204.77 in 1000s), followed by China (1,651.72, 1,212.35-2,103.21), and then Pakistan (342.45, 213.87-492.17) (table 2). DALY rates per 100,000 population showed that India remained on top with DALY rate of 190.77 (UI=139.37-244.33), followed by Pakistan with DALY rate of 181.14 (UI=113.12-260.33), then Bangladesh with DALY rate of 136.84 (UI=99.13-176.20) (table 2). Age standardized DALY rates showed Pakistan leading, followed by India, then Bangladesh with age adjusted DALY rates of 254.25 (UI=157.33-365.23), 238.25 (UI=173.90-303.98), and 183.21 (132.76-236.87), respectively.

Among all countries and territories, those with the highest age standardized DALY rates included Afghanistan, El Salvador, Nicaragua, Mexico, Honduras, Iraq, Guatemala, Philippines, Palestine, and Belize (supplemental table 2). Mapping the geographic distribution of age standardized DALY rates across the globe showed populations in Mesoamerica, Northern Africa, South Africa, several countries in the Eastern Mediterranean Region, Afghanistan, Pakistan, India, and several countries in Southeast Asia were amongst those with highest age standardized DALY rates (figure 4). For example, age standardized DALYs per 100,000 were 543.35 (391.16-707.96) in El Salvador, 455.29 (332.51-577.97) in Mexico, 408.41 (283.82-551.84) in Guatemala, 295.39 (203.17-401.39) in Jordan, 273.55 (184.84-379.35) in Egypt, 264.23 (181.58-360.76) in Morocco, 259.46 (189.72-330.98) in South Africa, 205.12 (148.73-264.89) in Thailand, 183.21 (132.76-236.87) in Bangladesh, and 178.26 (125.31-238.47) in Sri Lanka. The map identified Canada, several northern European

1 and Scandinavian countries, New Zealand, and Australia as having lowest estimates of age standardized  
2 DALY rates. For example, age standardized DALY rates were 5.52 (0.82-11.48) in Sweden, 6.46 (0.00-14.49)  
3 in Australia, and 12.13 (4.95-21.82) in Canada (figure 4).  
4  
5  
6

### 7 **Frontier analysis:**

8  
9 We developed a frontier analysis to identify countries and territories which exhibited the least burden of kidney  
10 disease attributable to particulate matter air pollution given their SDI. The analysis provides a comparative  
11 quantitative assessment of the potential reduction in CKD burden that might be achievable in each country  
12 given their social and economic development. Most importantly, for each SDI, this analysis identifies exemplar  
13 countries at the frontier (with lowest DALYs for their SDI), and countries with the highest DALYs for their SDI.  
14  
15 The effective difference between the frontier and the highest DALYs given an SDI represents a hypothetical  
16 magnitude of potential improvement in impact of air pollution on burden of CKD in a given country. Frontier  
17 analysis of age adjusted DALYs are presented in figure 5. Supplemental table 3 provides the effective  
18 difference from the frontier for each country given that country SDI; countries with the largest effective  
19 difference were El Salvador, Afghanistan, Mexico, Nicaragua, Honduras, Philippines, Iraq, Guatemala, and  
20 Palestine. Among countries with an SDI<0.3, Somalia, Niger, Liberia, the Democratic Republic of Congo,  
21 Mozambique, and Burundi had age standardized DALY rates that are close to the frontier with an effective  
22 difference of less than 10. Afghanistan, Guinea-Bissau, and Chad also had an SDI <0.3; however, they  
23 exhibited relatively high age standardized DALY rates and effective difference from the frontier which  
24 exceeded 100 representing a large gap in performance vis-à-vis other countries with comparable resources.  
25  
26 Among reasonably well-resourced countries with an SDI>0.7, Mexico, Mauritius, The United Arab Emirates,  
27 Saudi Arabia, Turkmenistan, Venezuela, South Africa, Bahrain, and Mongolia had an effective difference from  
28 the frontier of more than 200 representing potential unrealized opportunities for progress in those countries  
29 given their resources.  
30  
31  
32  
33  
34  
35  
36  
37  
38  
39  
40  
41  
42  
43  
44  
45  
46  
47  
48  
49  
50

51  
52 To further evaluate the frontier independent of potential contamination by other strong drivers of CKD such as  
53 diabetes—where it is a major driver in Mexico[34]—and hypertension, we rebuilt the entire frontier following a  
54 decomposition analysis of risk-deleted cause-specific DALYs where we risk deleted DALYs caused by  
55  
56  
57  
58  
59  
60



1 diabetes and hypertension. This analysis yielded consistent results (supplemental figure 1); specifically, that  
2 several countries including Mesoamerica exhibited significant effective difference from the frontier suggesting a  
3  
4 disproportionately higher PM<sub>2.5</sub> attributable DALYs than would be expected by their SDI (supplemental figure 1).  
5  
6  
7

### 8 **Burden of CKD attributable to PM<sub>2.5</sub> levels above the WHO limit of 10 µg/m<sup>3</sup>:**

9  
10 All the primary analyses were developed considering risk attributable to exposure levels of PM<sub>2.5</sub> above a  
11  
12 uniform distribution between 2.4-5.9 µg/m<sup>3</sup> representing exposure values between the minimum and fifth  
13  
14 percentiles of exposure distributions from outdoor air pollution studies[7 8].  
15  
16  
17

18 We repeated all the analyses where we considered risk attributable to exposure levels of PM<sub>2.5</sub> above the  
19  
20 WHO limit of 10 µg/m<sup>3</sup> (using the alternate scenario where the theoretical minimal risk exposure level was set  
21  
22 at 10 µg/m<sup>3</sup>)[6]. The estimates describe the burden of kidney disease —globally and at the national level— that  
23  
24 is attributable to PM<sub>2.5</sub> concentrations in excess of the WHO limit. The geographic distribution of burden was  
25  
26 consistent with the primary results (supplemental table 4 and 5). The results from this analysis necessarily  
27  
28 underestimate the true burden as they—by definition—ignore PM<sub>2.5</sub> related risk below the WHO limit, but might  
29  
30 be informative to policy makers and relevant stakeholders in estimating the burden of CKD that could be  
31  
32 avoided should targeting the WHO limit become a policy goal.  
33  
34  
35

### 36 **Discussion:**

37  
38 In this work, we provide a quantitative analysis of the global burden of CKD attributable to air pollution in 194  
39  
40 countries and territories. The results describe the annual incidence of kidney disease attributable to air  
41  
42 pollution globally and at the national level, and provide a quantitative assessment of the years living with  
43  
44 disability due to kidney disease, years of life lost due to early mortality from kidney disease, and the combined  
45  
46 comprehensive measure of DALYs (years of healthy life lost, due to dying prematurely, and to the years living  
47  
48 with disability) of kidney disease attributable to air pollution. The global toll of CKD attributable to air pollution is  
49  
50 significant with 6.9 million incident cases of CKD per year, 101 cases per 100,000 population per year, and  
51  
52 11.4 million DALYs per year. The findings suggest substantial geographic variation and identify geographies  
53  
54 where the toll of air pollution may be a significant driver of the epidemiology of kidney disease. Our analyses  
55  
56  
57  
58  
59  
60

1 also suggest disproportionately higher PM<sub>2.5</sub> DALYs from kidney disease in several countries including  
2 Mesoamerica than would be expected for their SDI.  
3  
4  
5

6 According to the GBD study, global age standardized DALY rates attributable to PM<sub>2.5</sub> are 1,521 per  
7  
8 100,000[35]. Our estimates of PM<sub>2.5</sub> CKD DALYs were 164, representing 10.7% of the total global DALYs -  
9  
10 years of healthy life lost- attributable to air pollution[35]. Our analyses suggest that the overall burden of kidney  
11  
12 disease attributable to air pollution is shaped by the epidemiologic transition[36]. Among countries that are  
13  
14 poor with a high burden of communicable diseases and reduced life expectancy (for example several countries  
15  
16 in the African continent), we observed a lower global ranking for years of life lost than years of living with  
17  
18 disability (figures 2, and 3), reflecting increased probability of early loss of life from other diseases not related  
19  
20 to air pollution. The corollary observation is that in countries that are relatively more developed including  
21  
22 Mesoamerica, South America (including Venezuela, Gynae, Surinam, and Bolivia), Pakistan, India, and several  
23  
24 countries in southeast Asia ranked in the highest decile for YLL, but not in YLD reflecting much earlier loss of  
25  
26 life attributable to air pollution related kidney disease (figures 2 and 3). The results suggest that as countries  
27  
28 journey forward along the path of the epidemiologic transition, the contribution of air pollution to non-  
29  
30 communicable disease mortality in general, and more specifically CKD becomes more pronounced.  
31  
32 Unfortunately, CKD has been largely ignored in the global and WHO discussion of non-communicable  
33  
34 diseases[37-40]; CKD and its environmental drivers should feature on the national, international development,  
35  
36 and global health agendas[40-42] and should be assigned a priority commensurate with its ascending rank  
37  
38 among the global burden of diseases[2 10 13-16 43-48].  
39  
40  
41  
42  
43

44 Our results show substantial geographic variation in the global burden of CKD attributable to air pollution  
45  
46 (figure 4), where low and lower-middle income countries are most affected (figures 6 and 7). Air pollution is a  
47  
48 significant global problem with well documented transboundary health impacts due to international trade, and  
49  
50 atmospheric pollutant transport[49]; it results in an estimated 4.2 million deaths per year, and is worsening  
51  
52 especially in low-income, and middle-income countries[15 35 41 50]. This is consistent with findings from the  
53  
54 State of Global Air 2017 report where the largest increases in air pollution related death were in rapidly  
55  
56 industrializing low and middle income countries[35 41]. The global burden of CKD is increasing and its rank as  
57  
58  
59  
60

1 a contributor to disability and death is ascending[47]; it disproportionately impacts low-income and middle-  
2 income countries[1 40 47 51] which are least equipped to provide costly but life-saving CKD care[37 38]. While  
3 diabetes mellitus and hypertension are the leading causes of CKD in high and upper middle-income countries,  
4 a significant proportion of CKD cannot be explained by these traditional causes in low and lower middle-  
5 income countries where environmental exposures loom prominently as potential drivers of non-communicable  
6 diseases including CKD[40 41 52-54]. In an elegant recent editorial Jha and colleagues[55] reflected on the  
7 rise of kidney failure death in India, and suggested that a sizable portion of kidney failure is not due to  
8 traditional drivers (diabetes mellitus), and advocated for a research agenda to identify the drivers of this  
9 increased incidence of kidney failure and kidney failure death. Others have also advocated for greater  
10 understanding and larger emphasis of the role of environmental air pollution in non-communicable diseases,  
11 and specifically kidney disease[41 53]. The rise of CKD-of unknown origin in Mesoamerica and other  
12 geographies including India, and Sri Lanka illustrates the need for a broader and more comprehensive  
13 evaluation of potential risk factors for development and progression of kidney disease[40 56].  
14  
15  
16  
17  
18  
19  
20  
21  
22  
23  
24  
25  
26  
27  
28  
29

30 Our frontier analysis provides a blueprint to comparatively evaluate the CKD DALYs attributable to air pollution  
31 in countries with similar resources. The analysis identifies a cluster of countries with substantially higher CKD  
32 DALYs than would be expected for their place on the development spectrum. The clustering of countries  
33 including Mesoamerican countries with a high CKD DALYs gap attributable to air pollution is likely not random;  
34 and (a) supports the prescient hypothesis put forth by Orantes-Navarro et al.[56] for inclusion of environmental  
35 air pollution—among others—as a potential risk factor for CKD of unknown cause—a so far elusive disease  
36 entity, vibrantly discussed among luminaries in the field[40 46 57-66]—, and (b) potentially represents  
37 unrealized opportunity for improved performance through interventions in the form of laws, health and  
38 economic policy measures, reprioritization and alignment of resources, technological transition, and other  
39 devices that would ultimately close the DALYs gap. Similarly, our analysis identifies exemplar countries where  
40 performance for the county's level of development is considered leading (at the frontier pushing the envelope),  
41 the identification of these exemplars provides a window for better understanding of the potential drivers for  
42 success[38] and determination whether advocacy and wider adoption of these drivers by other countries might  
43 yield decreased CKD burden[42].  
44  
45  
46  
47  
48  
49  
50  
51  
52  
53  
54  
55  
56  
57  
58  
59

1  
2 While our analyses described the global and national burden of kidney disease attributable to PM<sub>2.5</sub> air  
3 pollution, consideration of the impact of other air pollutants (i.e. nitrogen oxides, ozone, carbon monoxide,  
4 PM<sub>10</sub>, and others)[52], a higher spatial resolution analysis at the subnational level, and a greater understanding  
5 of temporal trends over the years (e.g. an annual global CKD burden report which would track the contributions  
6 of all risk factors over time) are certainly needed to develop a better understanding of the epidemiology of CKD  
7 driven by air pollution. Future work should revisit this question to provide updated estimates of the burden of  
8 CKD attributable to ambient air pollution when updated and more accurate estimates for PM<sub>2.5</sub> and CKD are  
9 available across the PM<sub>2.5</sub> exposure spectrum for incorporation in integrative meta-regression methods[26 67  
10 68].

11  
12 Three hypotheses have been proposed to explain the mechanisms by which PM<sub>2.5</sub> may play a role in the  
13 development of CKD: a) Inhaled particulate matter may result in pulmonary inflammation which could then lead  
14 to systematic inflammation, b) pollutants may also induce disturbances in respiratory autonomic nervous  
15 system and subsequently provoke systemic disturbances resulting in kidney damage, c) evidence has also  
16 suggested that inhaled fine particulate matter when sufficiently small may enter the bloodstream and  
17 subsequently interact with kidney tissue[69 70]. Furthermore, the association between PM<sub>2.5</sub> and CKD has  
18 been supported by other work. In a recent study of the US Medicare population by Bragg-Gresham et al., a 4  
19 µg/m<sup>3</sup> increase in levels of PM<sub>2.5</sub> was associated with higher prevalence of diagnosed CKD (PR=1.03; 95%CI  
20 1.02-1.05)[71]. In a study of 100,629 adult non-CKD Taiwanese residents by Chen et al., a 10 µg/m<sup>3</sup> increase  
21 in PM<sub>2.5</sub> was associated with an increased risk of incident CKD (HR: 1.06; 95%CI: 1.02-1.10)[72].

22  
23 This study has several limitations. Our analyses do not account for the composition and toxic content of PM<sub>2.5</sub>;  
24 however, studies have shown that estimates using non-specific PM<sub>2.5</sub> biomass alone will underestimate the  
25 burden of kidney disease attributable to air pollution[7 8 50]. Furthermore, we considered that risk plateaued  
26 for PM<sub>2.5</sub> concentrations above 22 µg/m<sup>3</sup>, this likely yielded conservative estimate of the true burden of chronic  
27 kidney disease (CKD) attributable to air pollution. Our estimates of CKD attributable to PM<sub>2.5</sub> at the global and  
28 national levels reflect the influence not only of PM<sub>2.5</sub> levels across the globe, but also of demography and  
29 underlying CKD rates. Our analyses were performed at the global and national level where we assigned PM<sub>2.5</sub>

1 exposure, and generated incident rate of CKD for every country and territory; thus, our analyses do not provide  
2 further insight into the subnational level. We relied on estimates for incident CKD generated by the Global  
3 Burden of Disease study group, and while those Bayesian estimates are considered reliable, and robust, they  
4 are necessarily limited by the quality of the available data[73]. Furthermore, variability and inconsistency of  
5 data collection methods and tools across the countries could influence geographic variations[73]. Inaccuracies  
6 in prediction of population exposure levels may have introduced bias[74]. We did not have data on indoor air  
7 pollutants, which may have resulted in misclassification of exposure or confounding of observed associations.  
8 Collinearity with other pollutants, geographic heterogeneity in effect, seasonal variation, and lagged effect of  
9 exposure may have biased the association[75 76]. To generate the estimates provided in this report, we relied  
10 on risk estimates generated in prior work[23], and while the analytic strategies were robust including the  
11 application of negative controls, the possibility of residual confounding cannot be eliminated. Causal  
12 interpretations should be made with caution. Small differences in estimated risk could have profound impacts  
13 on estimated burden. In the GBD, CKD of unknown origin is not currently part of the casual framework;  
14 available evidence on how PM<sub>2.5</sub> is associated with CKD of different etiologies is limited, and if different, could  
15 have biased results.

16  
17  
18  
19  
20  
21  
22  
23  
24  
25  
26  
27  
28  
29  
30  
31  
32  
33  
34 Key strengths include leveraging the availability of the 2016 Global Burden of Disease data which is the most  
35 comprehensive compilation and analysis of global health information available; we also employed GBD  
36 methodologies including the concept of DALY to capture the burden of disease across the globe and a  
37 measure of uncertainty (to reflect how much we know, and how much we don't know). We also developed a  
38 frontier analysis to enable comparative evaluation among countries with similar SDI, and finally, we repeated  
39 all analyses using an alternative scenario where we considered the WHO air quality standards as  
40 counterfactual.

41  
42  
43  
44  
45  
46  
47  
48  
49  
50  
51 In sum, our results show that the global toll of CKD attributable to air pollution is significant. The burden varies  
52 substantially by geography. Air pollution might be a contributing risk factor and might partially explain the rise in  
53 the incidence of CKD of unknown cause in some geographies around the world. As countries further develop  
54  
55  
56  
57  
58  
59  
60

1 and industrialize and travel along the path of the epidemiologic transition, the rise in air pollution related non-  
2 communicable disease and specifically kidney disease should be reflected on the global health agendas.  
3  
4  
5  
6  
7  
8  
9  
10  
11  
12  
13  
14  
15  
16  
17  
18  
19  
20  
21  
22  
23  
24  
25  
26  
27  
28  
29  
30  
31  
32  
33  
34  
35  
36  
37  
38  
39  
40  
41  
42  
43  
44  
45  
46  
47  
48  
49  
50  
51  
52  
53  
54  
55  
56  
57  
58  
59  
60

For peer review only

## Footnotes

### Acknowledgment:

In this report, we used the publicly available Global Burden of Disease studies data and methodologies. The Global Burden of Disease Collaborator Network is comprised of more than 2,700 collaborators worldwide and is headquartered at the Institute for Health Metrics and Evaluation (IHME) in Seattle, Washington. The estimates used in generating this manuscript relied on the GBD data and methodologies, we acknowledge the visionary global health leadership of IHME, and the contribution of all collaborators without whom this report would not be possible.

We are enormously grateful to Martin Krzywinski for his instrumental help in generating the Circos plot in this manuscript.

**Contributors:** Research area and study design: BB, YX, ZAA; data acquisition: BB, YX, ZAA; data analysis: BB, YX, ZAA; interpretation of study results: BB, YX, TL, YY, HX, ZAA; statistical analysis: BB, YX; drafting the manuscript: BB, ZAA; revision and comment on manuscript: YX, TL, YY, HX; supervision or mentorship: ZAA. Each author contributed important intellectual content during manuscript drafting or revision and accepts accountability for the overall work by ensuring that questions pertaining to the accuracy or integrity of any portion of the work are appropriately investigated and resolved. ZAA takes responsibility that this study has been reported honestly, accurately, and transparently; that no important aspects of the study have been omitted.

**Funding:** This research was funded by the United States Department of Veterans Affairs. The funders of this study had no role in study design; collection, analysis, and interpretation of data; writing the report; and the decision to submit the report for publication.

**Competing interests:** All authors have completed the ICMJE uniform disclosure form at [www.icmje.org/coi\\_disclosure.pdf](http://www.icmje.org/coi_disclosure.pdf) and declare: no support from any organisation for the submitted work; no financial relationships with any organisations that might have an interest in the submitted work in the previous three years; no other relationships or activities that could appear to have influenced the submitted work.

**Ethical approval:** This research project was reviewed and approved by the Institutional Review Board of the VA Saint Louis Health Care System.

**Data sharing:** Data is available through the Global Burden of Disease Results Portal. <http://ghdx.healthdata.org/gbd-results-tool>

**Transparency:** The lead authors affirm that the manuscript is an honest, accurate, and transparent account of the study being reported; that no important aspects of the study have been omitted; and that any discrepancies from the study as planned have been explained.

**Disclaimer:** The contents do not represent the views of the U.S. Department of Veterans Affairs or the United States Government.

**Disclosures:** My co-authors and I declare no conflicts of interest.



**References:**

1. Mills KT, Xu Y, Zhang W, et al. A systematic analysis of worldwide population-based data on the global burden of chronic kidney disease in 2010. *Kidney international* 2015;**88**(5):950-7 doi: 10.1038/ki.2015.230[published Online First: Epub Date]].
2. Bowe B, Xie, Y, Xian, H, Lian, M, Al-Aly, Z. Geographic Variation and US County Characteristics Associated with Rapid Kidney Function Decline. *Kidney International Reports* 2017;**2**(1):5-17 doi: <http://dx.doi.org/10.1016/j.ekir.2016.08.016>[published Online First: Epub Date]].
3. Bruck K, Stel VS, Gambaro G, et al. CKD Prevalence Varies across the European General Population. *Journal of the American Society of Nephrology : JASN* 2015 doi: 10.1681/ASN.2015050542[published Online First: Epub Date]].
4. Xie Y, Bowe B, Mokdad AH, et al. Analysis of the Global Burden of Disease study highlights the global, regional, and national trends of chronic kidney disease epidemiology from 1990 to 2016. *Kidney international* 2018;**94**(3):567-81 doi: 10.1016/j.kint.2018.04.011[published Online First: Epub Date]].
5. Black C, van der Veer SN. Unlocking the Value of Variation in CKD Prevalence. *Journal of the American Society of Nephrology : JASN* 2015 doi: 10.1681/ASN.2015111280[published Online First: Epub Date]].
6. Bowe B, Xie Y, Li T, et al. Particulate Matter Air Pollution and the Risk of Incident CKD and Progression to ESRD. *Journal of the American Society of Nephrology : JASN* 2017 doi: 10.1681/ASN.2017030253[published Online First: Epub Date]].
7. Brauer M, Freedman G, Frostad J, et al. Ambient Air Pollution Exposure Estimation for the Global Burden of Disease 2013. *Environ Sci Technol* 2016;**50**(1):79-88 doi: 10.1021/acs.est.5b03709[published Online First: Epub Date]].
8. Cohen AJ, Brauer M, Burnett R, et al. Estimates and 25-year trends of the global burden of disease attributable to ambient air pollution: an analysis of data from the Global Burden of Diseases Study 2015. *Lancet* 2017;**389**(10082):1907-18 doi: 10.1016/S0140-6736(17)30505-6[published Online First: Epub Date]].
9. Group TWB. PM2.5 air pollution, mean annual exposure (micrograms per cubic meter). Secondary PM2.5 air pollution, mean annual exposure (micrograms per cubic meter). <https://data.worldbank.org/indicator/EN.ATM.PM25.MC.M3>
10. Disease GBD, Injury I, Prevalence C. Global, regional, and national incidence, prevalence, and years lived with disability for 328 diseases and injuries for 195 countries, 1990-2016: a systematic analysis for the Global Burden of Disease Study 2016. *Lancet* 2017;**390**(10100):1211-59 doi: 10.1016/S0140-6736(17)32154-2[published Online First: Epub Date]].
11. Group GBoDS. GBD Results Tool. Secondary GBD Results Tool 2017. <http://ghdx.healthdata.org/gbd-results-tool>.
12. Abraham D, Flaxman TV, Christopher J.L, Murray. *An Integrative Metaregression Framework for Descriptive Epidemiology*. First Edition ed: University of Washington Press, 2015.
13. Collaborators GBDRF. Global, regional, and national comparative risk assessment of 84 behavioural, environmental and occupational, and metabolic risks or clusters of risks, 1990-2016: a systematic analysis for the Global Burden of Disease Study 2016. *Lancet* 2017;**390**(10100):1345-422 doi: 10.1016/S0140-6736(17)32366-8[published Online First: Epub Date]].
14. DALYs GBD, Collaborators H. Global, regional, and national disability-adjusted life-years (DALYs) for 333 diseases and injuries and healthy life expectancy (HALE) for 195 countries and territories, 1990-2016: a systematic analysis for the Global Burden of Disease Study 2016. *Lancet* 2017;**390**(10100):1260-344 doi: 10.1016/S0140-6736(17)32130-X[published Online First: Epub Date]].
15. Collaborators GBDCoD. Global, regional, and national age-sex specific mortality for 264 causes of death, 1980-2016: a systematic analysis for the Global Burden of Disease Study 2016. *Lancet* 2017;**390**(10100):1151-210 doi: 10.1016/S0140-6736(17)32152-9[published Online First: Epub Date]].
16. Collaborators GBDM. Global, regional, and national under-5 mortality, adult mortality, age-specific mortality, and life expectancy, 1970-2016: a systematic analysis for the Global Burden of Disease Study 2016. *Lancet* 2017;**390**(10100):1084-150 doi: 10.1016/S0140-6736(17)31833-0[published Online First: Epub Date]].
17. Collaborators GBDRF. Global, regional, and national comparative risk assessment of 79 behavioural, environmental and occupational, and metabolic risks or clusters of risks, 1990-2015: a systematic

- analysis for the Global Burden of Disease Study 2015. *Lancet* 2016;**388**(10053):1659-724 doi: 10.1016/S0140-6736(16)31679-8[published Online First: Epub Date]].
18. 2015 GBoDS. Global Burden of Disease Study 2015 (GBD 2015) Population Estimates 1970-2015. . Institute for Health Metrics and Evaluation (IHME) 2015
  19. Bank W. World Bank Country and Lending Groups: World Bank list of economies June 2017. . Secondary World Bank Country and Lending Groups: World Bank list of economies June 2017. 2017. <https://datahelpdesk.worldbank.org/knowledgebase/articles/906519>.
  20. Vaidyanathan A, Dimmick WF, Kegler SR, et al. Statistical air quality predictions for public health surveillance: evaluation and generation of county level metrics of PM2.5 for the environmental public health tracking network. *Int J Health Geogr* 2013;**12**:12 doi: 10.1186/1476-072X-12-12[published Online First: Epub Date]].
  21. Van Donkelaar A, Martin RV, Brauer M, et al. Use of satellite observations for long-term exposure assessment of global concentrations of fine particulate matter. *Environmental health perspectives* 2015;**123**(2):135
  22. Van Donkelaar A, Martin RV, Brauer M, et al. Global Annual PM2.5 Grids from MODIS, MISR and SeaWiFS Aerosol Optical Depth (AOD), v1 (1998–2012). DATA Palisades, NY: NASA Socioeconomic Data and Applications Center (SEDAC) <http://dx.doi.org/10.7927/H4028PFS> 2015
  23. Bowe B, Xie Y, Li T, et al. Particulate Matter Air Pollution and the Risk of Incident CKD and Progression to ESRD. *Journal of the American Society of Nephrology : JASN* 2018;**29**(1):218-30 doi: 10.1681/ASN.2017030253[published Online First: Epub Date]].
  24. Cohen AJ, Brauer M, Burnett R, et al. Estimates and 25-year trends of the global burden of disease attributable to ambient air pollution: an analysis of data from the Global Burden of Diseases Study 2015. *Lancet* 2017 doi: 10.1016/S0140-6736(17)30505-6[published Online First: Epub Date]].
  25. Burnett RT, Pope III CA, Ezzati M, et al. An integrated risk function for estimating the global burden of disease attributable to ambient fine particulate matter exposure. *Environmental health perspectives* 2014;**122**(4):397
  26. Burnett RT, Pope CA, 3rd, Ezzati M, et al. An integrated risk function for estimating the global burden of disease attributable to ambient fine particulate matter exposure. *Environ Health Perspect* 2014;**122**(4):397-403 doi: 10.1289/ehp.1307049[published Online First: Epub Date]].
  27. Lim SS, Vos T, Flaxman AD, et al. A comparative risk assessment of burden of disease and injury attributable to 67 risk factors and risk factor clusters in 21 regions, 1990-2010: a systematic analysis for the Global Burden of Disease Study 2010. *Lancet* 2012;**380**(9859):2224-60 doi: 10.1016/S0140-6736(12)61766-8[published Online First: Epub Date]].
  28. Organization WH. Air Quality Guidelines: Global Update 2005. Secondary Air Quality Guidelines: Global Update 2005 2005. [http://www.who.int/phe/health\\_topics/outdoorair/outdoorair\\_agg/en/](http://www.who.int/phe/health_topics/outdoorair/outdoorair_agg/en/).
  29. Network GBoDC. Global Burden of Disease Study 2016 (GBD 2016) Disability Weights. In: (IHME) IfHMaE, ed. Seattle, Washington, 2017.
  30. Krzywinski M, Schein J, Birol I, et al. Circos: an information aesthetic for comparative genomics. *Genome research* 2009;**19**(9):1639-45
  31. Access GBDH, Quality Collaborators. Electronic address cue, Access GBDH, et al. Healthcare Access and Quality Index based on mortality from causes amenable to personal health care in 195 countries and territories, 1990-2015: a novel analysis from the Global Burden of Disease Study 2015. *Lancet* 2017 doi: 10.1016/S0140-6736(17)30818-8[published Online First: Epub Date]].
  32. Bogetoft PaO, L. *Benchmarking with data envelopment analysis, stochastic frontier analysis, and R*. . 2011 edition. ed, 2013.
  33. Xie Y, Bowe B, Xian H, et al. Rate of Kidney Function Decline and Risk of Hospitalizations in Stage 3A CKD. *Clinical journal of the American Society of Nephrology : CJASN* 2015;**10**(11):1946-55 doi: 10.2215/CJN.04480415[published Online First: Epub Date]].
  34. Jimenez-Cruz A, Bacardi-Gascon M. The fattening burden of type 2 diabetes on Mexicans: projections from early growth to adulthood. *Diabetes care* 2004;**27**(5):1213-5
  35. Health Effects Institute. 2017. State of Global Air 2017. Special Report. Boston MHEI.
  36. Omran AR. The epidemiologic transition: a theory of the epidemiology of population change. 1971. *Milbank Q* 2005;**83**(4):731-57 doi: 10.1111/j.1468-0009.2005.00398.x[published Online First: Epub Date]].

37. Levin A, Tonelli M, Bonventre J, et al. Global kidney health 2017 and beyond: a roadmap for closing gaps in care, research, and policy. *Lancet* 2017 doi: 10.1016/S0140-6736(17)30788-2[published Online First: Epub Date]].
38. Bello AK, Levin A, Tonelli M, et al. Assessment of Global Kidney Health Care Status. *Jama* 2017;**317**(18):1864-81 doi: 10.1001/jama.2017.4046[published Online First: Epub Date]].
39. Organization WH. Global Status Report on Noncommunicable Diseases. WHO Press 2014
40. Jha V, Garcia-Garcia G, Iseki K, et al. Chronic kidney disease: global dimension and perspectives. *Lancet* 2013;**382**(9888):260-72 doi: 10.1016/S0140-6736(13)60687-X[published Online First: Epub Date]].
41. Landrigan PJ. Air pollution and the kidney—implications for control of non-communicable diseases. *The Lancet Planetary Health* 2017 doi: [http://dx.doi.org/10.1016/S2542-5196\(17\)30120-1](http://dx.doi.org/10.1016/S2542-5196(17)30120-1)[published Online First: Epub Date]].
42. Tonelli M, Agarwal S, Cass A, et al. How to advocate for the inclusion of chronic kidney disease in a national noncommunicable chronic disease program. *Kidney international* 2014;**85**(6):1269-74 doi: 10.1038/ki.2012.488[published Online First: Epub Date]].
43. Glasscock RJ, Warnock DG, Delanaye P. The global burden of chronic kidney disease: estimates, variability and pitfalls. *Nature reviews Nephrology* 2017;**13**(2):104-14 doi: 10.1038/nrneph.2016.163[published Online First: Epub Date]].
44. Hill NR, Fatoba ST, Oke JL, et al. Global Prevalence of Chronic Kidney Disease - A Systematic Review and Meta-Analysis. *PLoS One* 2016;**11**(7):e0158765 doi: 10.1371/journal.pone.0158765[published Online First: Epub Date]].
45. Whelan E. The global epidemic of chronic kidney disease: a call for action. *Occup Environ Med* 2016;**73**(8):499-500 doi: 10.1136/oemed-2016-103734[published Online First: Epub Date]].
46. Weaver VM, Fadrowski JJ, Jaar BG. Global dimensions of chronic kidney disease of unknown etiology (CKDu): a modern era environmental and/or occupational nephropathy? *BMC Nephrol* 2015;**16**:145 doi: 10.1186/s12882-015-0105-6[published Online First: Epub Date]].
47. Jager KJ, Fraser SDS. The ascending rank of chronic kidney disease in the global burden of disease study. *Nephrology, dialysis, transplantation : official publication of the European Dialysis and Transplant Association - European Renal Association* 2017;**32**(suppl\_2):ii121-ii28 doi: 10.1093/ndt/gfw330[published Online First: Epub Date]].
48. Diabetes GBDEMR, Collaborators CKD, Mokdad AH. Diabetes mellitus and chronic kidney disease in the Eastern Mediterranean Region: findings from the Global Burden of Disease 2015 study. *Int J Public Health* 2017 doi: 10.1007/s00038-017-1014-1[published Online First: Epub Date]].
49. Zhang Q, Jiang X, Tong D, et al. Transboundary health impacts of transported global air pollution and international trade. *Nature* 2017;**543**(7647):705-09 doi: 10.1038/nature21712[published Online First: Epub Date]].
50. Lelieveld J, Evans JS, Fnais M, et al. The contribution of outdoor air pollution sources to premature mortality on a global scale. *Nature* 2015;**525**(7569):367-71 doi: 10.1038/nature15371[published Online First: Epub Date]].
51. Neuen BL CS, Demaio AR, et al. Chronic kidney disease and the global NCDs agenda. *BMJ Glob Health* 2017 doi: doi:10.1136/bmjgh-2017-000380[published Online First: Epub Date]].
52. Benjamin Bowe YX, Tingting Li, Yan Yan, Hong Xian, Ziyad Al-Aly. Associations of ambient coarse particulate matter, nitrogen dioxide, and carbon monoxide with the risk of kidney disease: a cohort study. *The Lancet Planetary Health* 2017
53. Stanifer JW, Muiro A, Jafar TH, et al. Chronic kidney disease in low- and middle-income countries. *Nephrology, dialysis, transplantation : official publication of the European Dialysis and Transplant Association - European Renal Association* 2016;**31**(6):868-74 doi: 10.1093/ndt/gfv466[published Online First: Epub Date]].
54. Wimalawansa SA, Wimalawansa SJ. Environmentally induced, occupational diseases with emphasis on chronic kidney disease of multifactorial origin affecting tropical countries. *Ann Occup Environ Med* 2016;**28**:33 doi: 10.1186/s40557-016-0119-y[published Online First: Epub Date]].
55. Jha V, Modi G. Uncovering the rising kidney failure deaths in India. *Lancet Glob Health* 2017;**5**(1):e14-e15 doi: 10.1016/S2214-109X(16)30299-6[published Online First: Epub Date]].
56. Orantes-Navarro CM, Herrera-Valdes R, Almaguer-Lopez M, et al. Toward a Comprehensive Hypothesis of Chronic Interstitial Nephritis in Agricultural Communities. *Adv Chronic Kidney Dis* 2017;**24**(2):101-06 doi: 10.1053/j.ackd.2017.01.001[published Online First: Epub Date]].



57. Jayasumana C, Orantes C, Herrera R, et al. Chronic interstitial nephritis in agricultural communities: a worldwide epidemic with social, occupational and environmental determinants. *Nephrology, dialysis, transplantation : official publication of the European Dialysis and Transplant Association - European Renal Association* 2017;**32**(2):234-41 doi: 10.1093/ndt/gfw346[published Online First: Epub Date]].
58. Zoccali C. Causal mechanism and component causes in Mesoamerican-Sri Lankan nephropathy: the moderator's view. *Nephrology, dialysis, transplantation : official publication of the European Dialysis and Transplant Association - European Renal Association* 2017;**32**(4):607-10 doi: 10.1093/ndt/gfx030[published Online First: Epub Date]].
59. Johnson RJ. Pro: Heat stress as a potential etiology of Mesoamerican and Sri Lankan nephropathy: a late night consult with Sherlock Holmes. *Nephrology, dialysis, transplantation : official publication of the European Dialysis and Transplant Association - European Renal Association* 2017;**32**(4):598-602 doi: 10.1093/ndt/gfx034[published Online First: Epub Date]].
60. Campese VM. Con: Mesoamerican nephropathy: is the problem dehydration or rehydration? *Nephrology, dialysis, transplantation : official publication of the European Dialysis and Transplant Association - European Renal Association* 2017;**32**(4):603-06 doi: 10.1093/ndt/gfx033[published Online First: Epub Date]].
61. Campese VM. The Mesoamerican nephropathy: a regional epidemic of chronic kidney disease? *Nephrology, dialysis, transplantation : official publication of the European Dialysis and Transplant Association - European Renal Association* 2016;**31**(3):335-6 doi: 10.1093/ndt/gfv430[published Online First: Epub Date]].
62. Correa-Rotter R, Wesseling C, Johnson RJ. CKD of unknown origin in Central America: the case for a Mesoamerican nephropathy. *Am J Kidney Dis* 2014;**63**(3):506-20 doi: 10.1053/j.ajkd.2013.10.062[published Online First: Epub Date]].
63. Wesseling C, Crowe J, Hogstedt C, et al. Resolving the enigma of the mesoamerican nephropathy: a research workshop summary. *American journal of kidney diseases : the official journal of the National Kidney Foundation* 2014;**63**(3):396-404 doi: 10.1053/j.ajkd.2013.08.014[published Online First: Epub Date]].
64. Johnson RJ, Sanchez-Lozada LG. Chronic kidney disease: Mesoamerican nephropathy--new clues to the cause. *Nature reviews Nephrology* 2013;**9**(10):560-1 doi: 10.1038/nrneph.2013.174[published Online First: Epub Date]].
65. Garcia-Trabanino R, Jarquin E, Wesseling C, et al. Heat stress, dehydration, and kidney function in sugarcane cutters in El Salvador--A cross-shift study of workers at risk of Mesoamerican nephropathy. *Environ Res* 2015;**142**:746-55 doi: 10.1016/j.envres.2015.07.007[published Online First: Epub Date]].
66. Wimalawansa SJ. Escalating chronic kidney diseases of multi-factorial origin (CKD-mfo) in Sri Lanka: causes, solutions, and recommendations-update and responses. *Environ Health Prev Med* 2015;**20**(2):152-7 doi: 10.1007/s12199-015-0447-5[published Online First: Epub Date]].
67. Bowe B, Xie Y, Li T, et al. The 2016 global and national burden of diabetes mellitus attributable to PM2.5 air pollution. *The Lancet Planetary health* 2018;**2**(7):e301-e12 doi: 10.1016/S2542-5196(18)30140-2[published Online First: Epub Date]].
68. Burnett R, Chen H, Szyszkowicz M, et al. Global estimates of mortality associated with long-term exposure to outdoor fine particulate matter. *Proceedings of the National Academy of Sciences of the United States of America* 2018;**115**(38):9592-97 doi: 10.1073/pnas.1803222115[published Online First: Epub Date]].
69. Chin MT. Basic mechanisms for adverse cardiovascular events associated with air pollution. *Heart* 2015;**101**(4):253-6 doi: 10.1136/heartjnl-2014-306379[published Online First: Epub Date]].
70. Miller MR, Raftis JB, Langrish JP, et al. Inhaled Nanoparticles Accumulate at Sites of Vascular Disease. *ACS Nano* 2017 doi: 10.1021/acsnano.6b08551[published Online First: Epub Date]].
71. Bragg-Gresham J, Morgenstern H, McClellan W, et al. County-level air quality and the prevalence of diagnosed chronic kidney disease in the US Medicare population. *PloS one* 2018;**13**(7):e0200612 doi: 10.1371/journal.pone.0200612[published Online First: Epub Date]].
72. Chen SY, Chu DC, Lee JH, et al. Traffic-related air pollution associated with chronic kidney disease among elderly residents in Taipei City. *Environmental pollution* 2018;**234**:838-45 doi: 10.1016/j.envpol.2017.11.084[published Online First: Epub Date]].

- 1 73. Thomas B, Matsushita K, Abate KH, et al. Global Cardiovascular and Renal Outcomes of Reduced GFR.  
2 Journal of the American Society of Nephrology : JASN 2017;**28**(7):2167-79 doi:  
3 10.1681/ASN.2016050562[published Online First: Epub Date]].  
4 74. Wang M, Beelen R, Bellander T, et al. Performance of multi-city land use regression models for nitrogen  
5 dioxide and fine particles. Environ Health Perspect 2014;**122**(8):843-9 doi:  
6 10.1289/ehp.1307271[published Online First: Epub Date]].  
7 75. Ito K, Thurston GD, Silverman RA. Characterization of PM2.5, gaseous pollutants, and meteorological  
8 interactions in the context of time-series health effects models. Journal of exposure science &  
9 environmental epidemiology 2007;**17 Suppl 2**:S45-60 doi: 10.1038/sj.jes.7500627[published Online  
10 First: Epub Date]].  
11 76. Krstic G. A reanalysis of fine particulate matter air pollution versus life expectancy in the United States.  
12 Journal of the Air & Waste Management Association 2012;**62**(9):989-91  
13  
14  
15  
16  
17  
18  
19  
20  
21  
22  
23  
24  
25  
26  
27  
28  
29  
30  
31  
32  
33  
34  
35  
36  
37  
38  
39  
40  
41  
42  
43  
44  
45  
46  
47  
48  
49  
50  
51  
52  
53  
54  
55  
56  
57  
58  
59  
60

## Tables:

**Table 1:** Attributable burden of chronic kidney disease (ABD) associated with PM<sub>2.5</sub> exposure globally, and for the top 10 most populous countries.

| Country           | PM <sub>2.5</sub> | Attributable Burden of Disease (in 1000s) | Attributable Burden of Disease (per 100,000) | Age Standardized Attributable Burden of Disease (per 100,000) |
|-------------------|-------------------|-------------------------------------------|----------------------------------------------|---------------------------------------------------------------|
| <b>Global</b>     | 42.27             | 6,950.51<br>(5,061.53, 8,914.74)          | 94.29<br>(68.67, 120.94)                     | 101.39<br>(74.49, 129.69)                                     |
| <b>China</b>      | 57.2              | 766.73<br>(558.72, 985.14)                | 55.42<br>(40.39, 71.21)                      | 48.98<br>(35.52, 63.01)                                       |
| <b>India</b>      | 72.6              | 1,092.52<br>(791.38, 1,407.28)            | 83.30<br>(60.34, 107.29)                     | 108.21<br>(77.99, 139.22)                                     |
| <b>US</b>         | 8.3               | 163.49<br>(88.76, 262.78)                 | 50.53<br>(27.44, 81.22)                      | 35.44<br>(19.39, 57.44)                                       |
| <b>Indonesia</b>  | 15                | 76.81<br>(53.66, 103.42)                  | 29.81<br>(20.83, 40.15)                      | 37.38<br>(26.05, 50.06)                                       |
| <b>Brazil</b>     | 11.1              | 69.03<br>(45.11, 99.44)                   | 33.21<br>(21.70, 47.84)                      | 36.57<br>(23.68, 52.72)                                       |
| <b>Pakistan</b>   | 63                | 107.43<br>(78.85, 137.04)                 | 56.83<br>(41.71, 72.49)                      | 89.17<br>(64.66, 114.14)                                      |
| <b>Nigeria</b>    | 36.9              | 195.23<br>(141.44, 250.95)                | 106.98<br>(77.51, 137.52)                    | 200.28<br>(145.24, 261.20)                                    |
| <b>Bangladesh</b> | 87                | 136.17<br>(99.56, 174.46)                 | 84.60<br>(61.86, 108.39)                     | 121.08<br>(88.55, 156.18)                                     |
| <b>Russia</b>     | 15.8              | 170.89<br>(118.90, 229.76)                | 115.38<br>(80.27, 155.12)                    | 82.87<br>(57.99, 111.67)                                      |
| <b>Japan</b>      | 13.1              | 134.56<br>(91.13, 186.81)                 | 104.88<br>(71.03, 145.60)                    | 44.79<br>(30.61, 61.70)                                       |

PM<sub>2.5</sub>, Fine particulate matter <2.5 µm

**Table 2:** Years living with disability (YLD), years of life lost (YLL), and disability adjusted life years (DALY) of chronic kidney disease associated with PM<sub>2.5</sub> for the top 10 most populous countries.

| Country           | Years Living with Disability (in 1000s) | Years Living with Disability (per 100,000) | Age Standardized Years Living with Disability (per 100,000) | Years of Life Lost (in 1000s)     | Years of Life Lost (per 100,000) | Age Standardized Years of Life Lost (per 100,000) | Disability Adjusted Life Years (in 1000s) | Disability Adjusted Life Years (per 100,000) | Age Standardized Disability Adjusted Life Years (per 100,000) |
|-------------------|-----------------------------------------|--------------------------------------------|-------------------------------------------------------------|-----------------------------------|----------------------------------|---------------------------------------------------|-------------------------------------------|----------------------------------------------|---------------------------------------------------------------|
| <b>Global</b>     | 2,849.31<br>(1,875.22, 3,983.94)        | 38.66<br>(25.44, 54.05)                    | 40.97 (26.84, 57.11)                                        | 8,587.74<br>(6,355.78, 10,772.24) | 116.51<br>(86.23, 146.14)        | 122.71<br>(90.36, 153.52)                         | 11,445.40<br>(8,380.25, 14,554.09)        | 155.27<br>(113.69, 197.45)                   | 163.69<br>(120.58, 207.28)                                    |
| <b>China</b>      | 462.21<br>(304.57, 647.27)              | 33.41<br>(22.01, 46.79)                    | 29.12 (19.36, 41.01)                                        | 1,188.22<br>(870.96, 1,501.83)    | 85.89<br>(62.95, 108.56)         | 76.18 (55.93, 96.49)                              | 1,651.72<br>(1,212.35, 2,103.21)          | 119.39<br>(87.63, 152.02)                    | 105.79<br>(77.30, 133.98)                                     |
| <b>India</b>      | 447.47<br>(289.00, 638.28)              | 34.12<br>(22.03, 48.66)                    | 45.40 (29.19, 64.54)                                        | 2,048.91<br>(1,471.02, 2,662.61)  | 156.21<br>(112.15, 203.00)       | 192.55<br>(138.73, 249.04)                        | 2,502.15<br>(1,827.96, 3,204.77)          | 190.77<br>(139.37, 244.33)                   | 238.25<br>(173.90, 303.98)                                    |
| <b>US</b>         | 61.54<br>(32.36, 105.07)                | 19.02<br>(10.00, 32.48)                    | 14.51 (7.59, 24.72)                                         | 104.78<br>(58.14, 165.08)         | 32.39<br>(17.97, 51.03)          | 23.30 (12.96, 36.77)                              | 166.61<br>(91.84, 264.98)                 | 51.50<br>(28.39, 81.90)                      | 37.92 (20.91, 60.47)                                          |
| <b>Indonesia</b>  | 40.67<br>(25.55, 60.13)                 | 15.79<br>(9.92, 23.34)                     | 20.02 (12.80, 29.32)                                        | 224.57<br>(158.94, 297.66)        | 87.17<br>(61.70, 115.54)         | 102.00<br>(72.07, 134.72)                         | 265.23<br>(186.14, 351.41)                | 102.95<br>(72.25, 136.41)                    | 122.19<br>(86.18, 162.36)                                     |
| <b>Brazil</b>     | 25.72<br>(15.29, 39.59)                 | 12.38<br>(7.36, 19.05)                     | 13.55 (8.11, 20.94)                                         | 98.88<br>(65.54, 139.27)          | 47.57<br>(31.53, 67.01)          | 51.17 (34.05, 72.01)                              | 124.85<br>(82.57, 176.65)                 | 60.07<br>(39.72, 84.99)                      | 64.76 (42.92, 91.88)                                          |
| <b>Pakistan</b>   | 47.74<br>(30.60, 68.12)                 | 25.25<br>(16.19, 36.03)                    | 39.99 (25.77, 56.99)                                        | 292.68<br>(174.43, 434.38)        | 154.81<br>(92.27, 229.76)        | 215.59<br>(123.95, 322.52)                        | 342.45<br>(213.87, 492.17)                | 181.14<br>(113.12, 260.33)                   | 254.25<br>(157.33, 365.23)                                    |
| <b>Nigeria</b>    | 61.22<br>(38.09, 88.68)                 | 33.55<br>(20.87, 48.59)                    | 71.93 (45.61, 103.27)                                       | 57.66<br>(37.92, 80.13)           | 31.60<br>(20.78, 43.91)          | 44.94 (29.23, 62.98)                              | 119.40<br>(82.97, 161.55)                 | 65.43<br>(45.47, 88.52)                      | 117.66<br>(81.05, 158.12)                                     |
| <b>Bangladesh</b> | 51.45<br>(33.04, 72.84)                 | 31.96<br>(20.53, 45.25)                    | 45.58 (28.89, 64.56)                                        | 168.36<br>(121.18, 220.47)        | 104.60<br>(75.28, 136.98)        | 137.57<br>(98.14, 179.69)                         | 220.26<br>(159.56, 283.60)                | 136.84<br>(99.13, 176.20)                    | 183.21<br>(132.76, 236.87)                                    |
| <b>Russia</b>     | 45.31<br>(27.94, 67.45)                 | 30.59<br>(18.86, 45.54)                    | 22.99 (14.08, 34.08)                                        | 54.05<br>(32.23, 81.33)           | 36.49<br>(21.76, 54.91)          | 28.25 (16.88, 42.28)                              | 100.14<br>(66.26, 140.14)                 | 67.61<br>(44.74, 94.61)                      | 51.29 (34.08, 72.60)                                          |
| <b>Japan</b>      | 57.64<br>(36.80, 84.54)                 | 44.92<br>(28.68, 65.89)                    | 21.97 (13.83, 32.50)                                        | 72.08<br>(49.89, 97.36)           | 56.18<br>(38.88, 75.88)          | 23.15 (16.00, 31.22)                              | 129.79<br>(88.75, 178.70)                 | 101.16<br>(69.17, 139.27)                    | 45.26 (30.63, 62.55)                                          |



**Figure Legends:**

**Figure 1:** Age standardized burden (ABD) of incident chronic kidney disease attributable to PM<sub>2.5</sub> per 100,000 population. ATG, Antigua and Barbuda; FSM, Federated States of Micronesia; Isl, Island; LCA, Saint Lucia; TLS, Timor-Leste; TTO, Trinidad and Tobago; VCT, Saint Vincent and the Grenadines.

**Figure 2:** Age standardized years living with disability (YLD) due to incident chronic kidney disease attributable to PM<sub>2.5</sub> per 100,000 population. ATG, Antigua and Barbuda; FSM, Federated States of Micronesia; Isl, Island; LCA, Saint Lucia; TLS, Timor-Leste; TTO, Trinidad and Tobago; VCT, Saint Vincent and the Grenadines.

**Figure 3:** Age standardized years of life lost (YLL) due to incident chronic kidney disease attributable to PM<sub>2.5</sub> per 100,000 population. ATG, Antigua and Barbuda; FSM, Federated States of Micronesia; Isl, Island; LCA, Saint Lucia; TLS, Timor-Leste; TTO, Trinidad and Tobago; VCT, Saint Vincent and the Grenadines.

**Figure 4:** Age standardized disability adjust life years (DALYs) due to incident chronic kidney disease attributable to PM<sub>2.5</sub> per 100,000 population. ATG, Antigua and Barbuda; FSM, Federated States of Micronesia; Isl, Island; LCA, Saint Lucia; TLS, Timor-Leste; TTO, Trinidad and Tobago; VCT, Saint Vincent and the Grenadines.

**Figure 5:** Frontier analysis of age standardized disability adjusted life years (DALY) rate per 100,000 population by socio-demographic index (SDI). Countries with the top 10% effective difference are labelled. Countries are colored by region.

**Figure 6:** Plot showing burden of CKD attributable to PM<sub>2.5</sub> in 194 countries and territories. Heat map tracks show percentiles, which from inside to outside represent the YLL, YLD, ABD, effective difference, and DALY. Scatter plot represents the DALYs (in open circles) and effective difference (in closed circles) percentile, with a reference line at the median. Values are graded, from low to high, as blue to red (on the Brewer palette). Countries are represented by their 3-character country code. Regions are ordered from low to high burden clockwise. NA=North America.

**Figure 7:** Age-standardized CKD DALYs (per 100,000) attributable to PM<sub>2.5</sub> by World Bank income classification.

1 **Supplemental Figure 1:** Frontier analysis of risk deleted cause specific age standardized disability adjusted  
2 life years (DALY) rate per 100,000 population by socio-demographic index (SDI). Countries with the top 10%  
3 effective difference are labelled. Countries are colored by region.  
4  
5  
6  
7  
8  
9  
10  
11  
12  
13  
14  
15  
16  
17  
18  
19  
20  
21  
22  
23  
24  
25  
26  
27  
28  
29  
30  
31  
32  
33  
34  
35  
36  
37  
38  
39  
40  
41  
42  
43  
44  
45  
46  
47  
48  
49  
50  
51  
52  
53  
54  
55  
56  
57  
58  
59  
60

For peer review only

1  
2  
3  
4  
5  
6  
7  
8  
9  
10  
11  
12  
13  
14  
15  
16  
17  
18  
19  
20  
21  
22  
23  
24  
25  
26  
27  
28  
29  
30  
31  
32  
33  
34  
35  
36  
37  
38  
39  
40  
41  
42  
43  
44  
45  
46  
47  
48  
49  
50  
51  
52  
53  
54  
55  
56  
57  
58  
59  
60

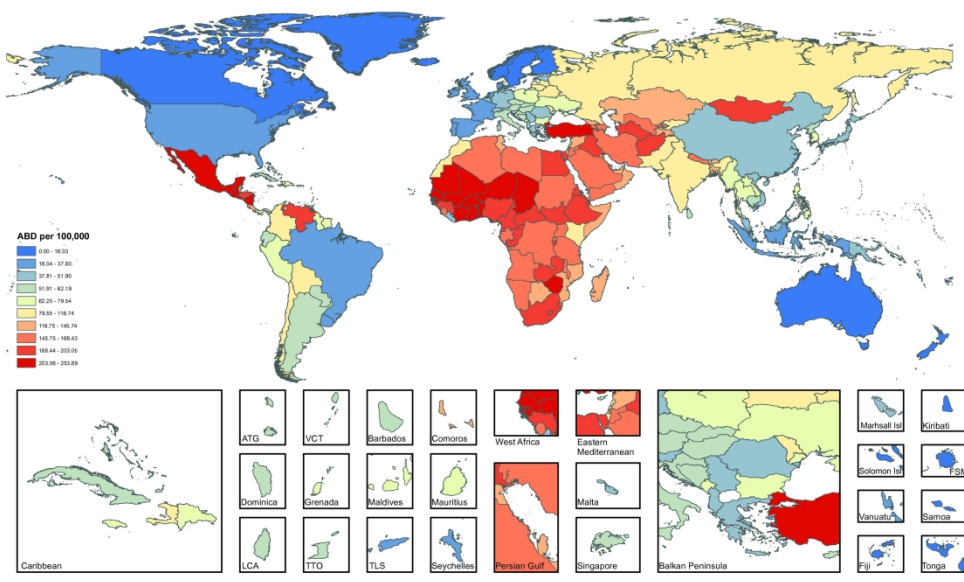

Figure 1

279x215mm (300 x 300 DPI)

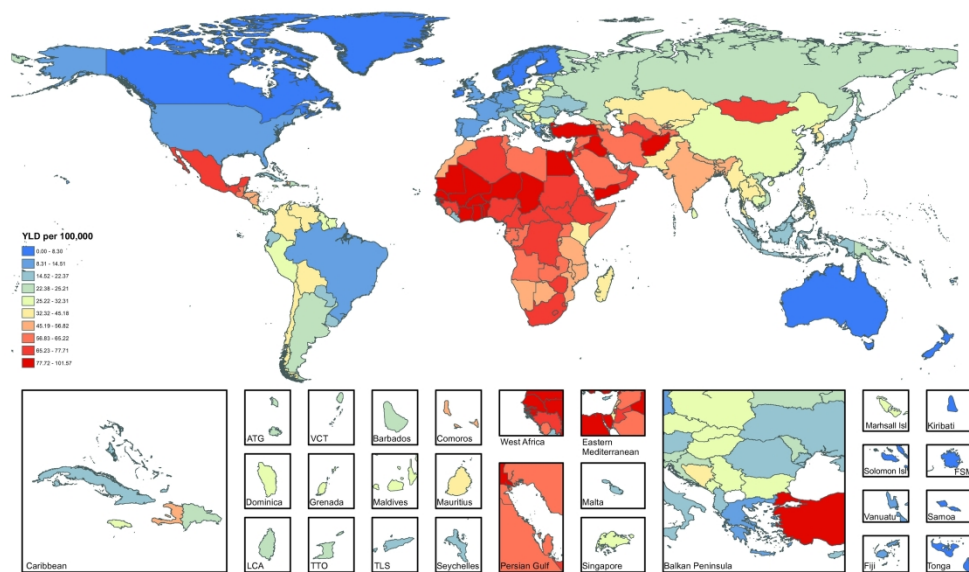

Figure 2

279x215mm (300 x 300 DPI)

1  
2  
3  
4  
5  
6  
7  
8  
9  
10  
11  
12  
13  
14  
15  
16  
17  
18  
19  
20  
21  
22  
23  
24  
25  
26  
27  
28  
29  
30  
31  
32  
33  
34  
35  
36  
37  
38  
39  
40  
41  
42  
43  
44  
45  
46  
47  
48  
49  
50  
51  
52  
53  
54  
55  
56  
57  
58  
59  
60

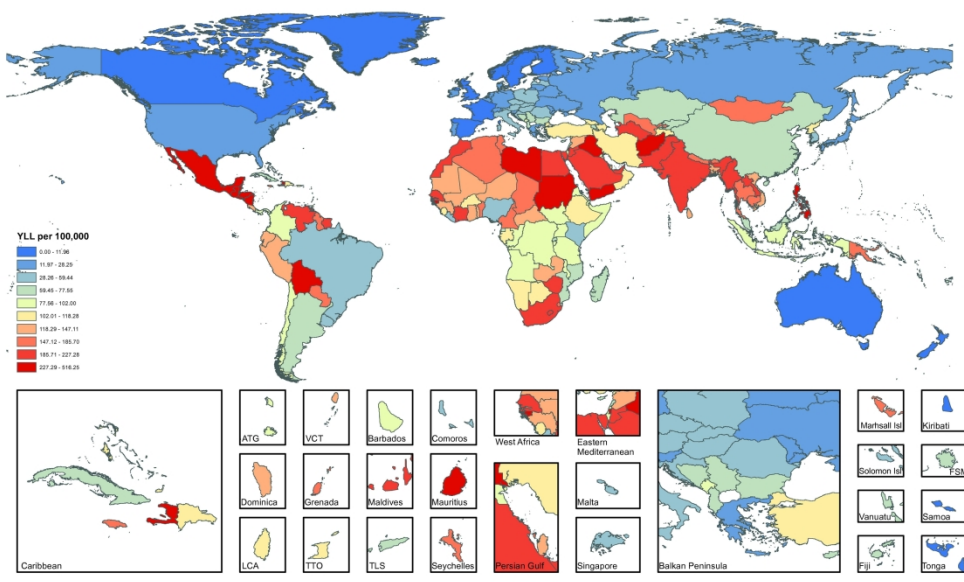

Figure 3

279x215mm (300 x 300 DPI)

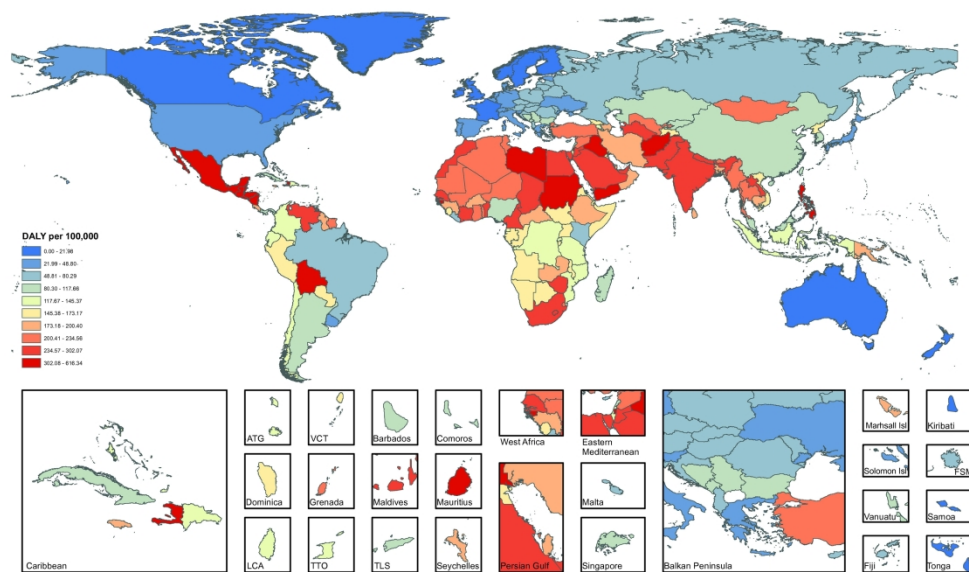

Figure 4

279x215mm (300 x 300 DPI)

1  
2  
3  
4  
5  
6  
7  
8  
9  
10  
11  
12  
13  
14  
15  
16  
17  
18  
19  
20  
21  
22  
23  
24  
25  
26  
27  
28  
29  
30  
31  
32  
33  
34  
35  
36  
37  
38  
39  
40  
41  
42  
43  
44  
45  
46  
47  
48  
49  
50  
51  
52  
53  
54  
55  
56  
57  
58  
59  
60

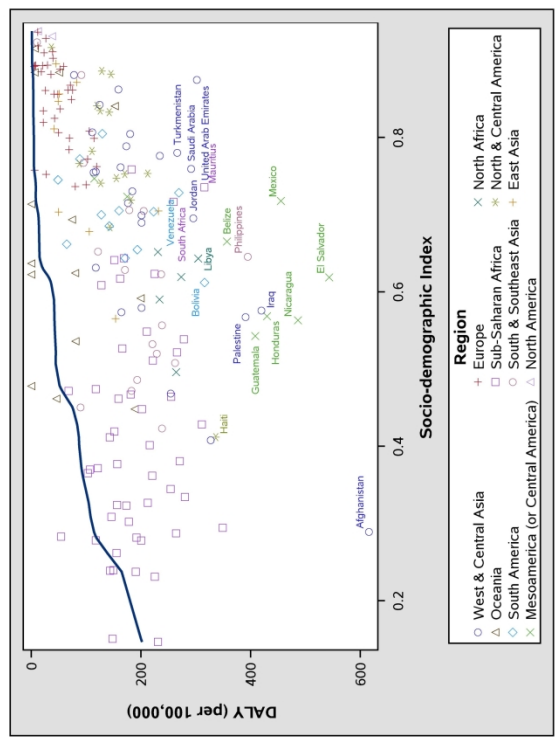

215x279mm (300 x 300 DPI)



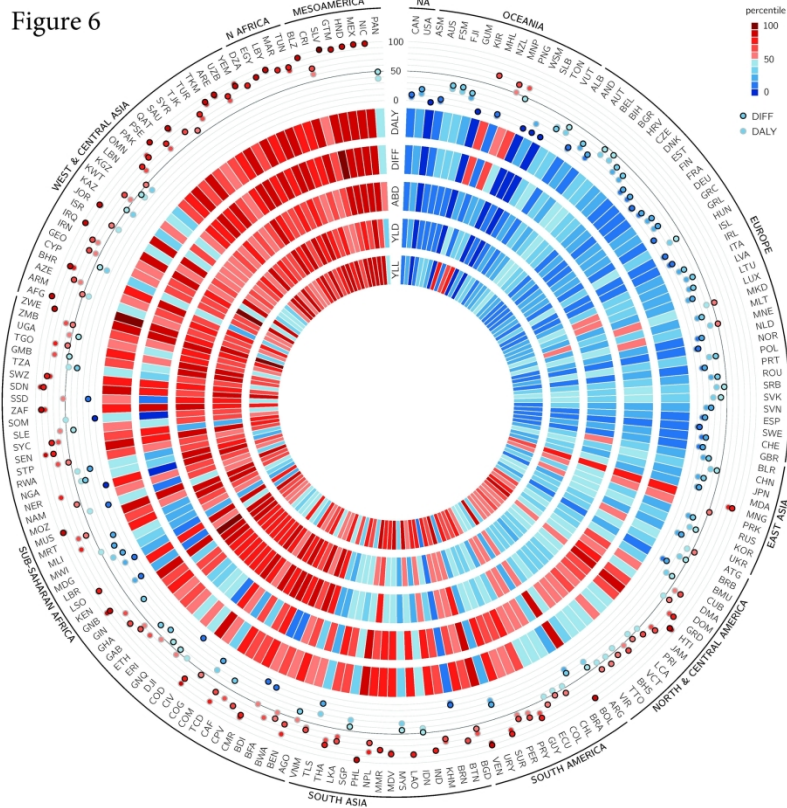

215x279mm (300 x 300 DPI)

1  
2  
3  
4  
5  
6  
7  
8  
9  
10  
11  
12  
13  
14  
15  
16  
17  
18  
19  
20  
21  
22  
23  
24  
25  
26  
27  
28  
29  
30  
31  
32  
33  
34  
35  
36  
37  
38  
39  
40  
41  
42  
43  
44  
45  
46  
47  
48  
49  
50  
51  
52  
53  
54  
55  
56  
57  
58  
59  
60

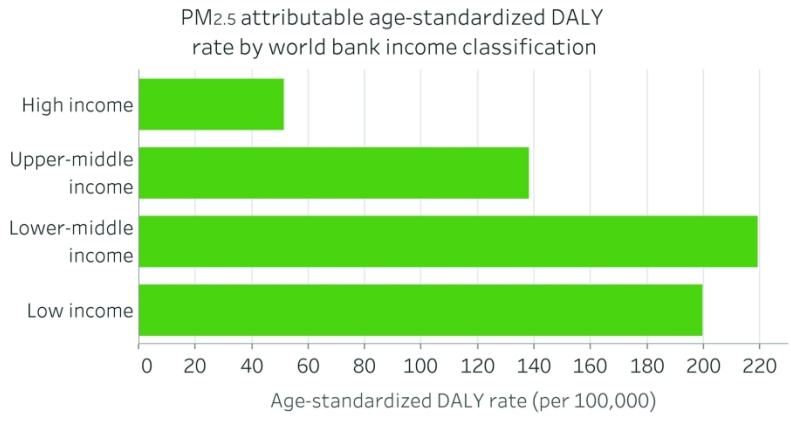

215x279mm (300 x 300 DPI)

1  
2  
3  
4  
5  
6  
7  
8  
9  
10  
11  
12  
13  
14  
15  
16  
17  
18  
19  
20  
21  
22  
23  
24  
25  
26  
27  
28  
29  
30  
31  
32  
33  
34  
35  
36  
37  
38  
39  
40  
41  
42  
43  
44  
45  
46  
47  
48  
49  
50  
51  
52  
53  
54  
55  
56  
57  
58  
59  
60

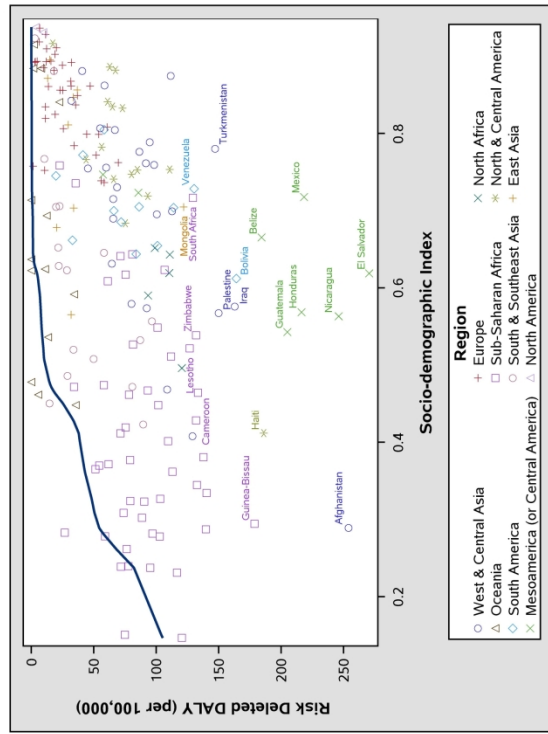

215x279mm (300 x 300 DPI)

## Supplemental Material:

Supplemental table 1: Country characteristics and attributable burden of incident chronic kidney disease attributable to PM<sub>2.5</sub>

| Country                    | Population (in 100,000s) | PM <sub>2.5</sub> (µg/m <sup>3</sup> ) | ABD (in 1000s)                | ABD (per 100,000)       | Age Standardized ABD (per 100,000) |
|----------------------------|--------------------------|----------------------------------------|-------------------------------|-------------------------|------------------------------------|
| <b>Global</b>              | 73710.68                 | 42.27353                               | 6,950.51 (5,061.53, 8,914.74) | 94.29 (68.67, 120.94)   | 101.39 (74.49, 129.69)             |
| <b>Afghanistan</b>         | 326.08                   | 46.1                                   | 30.62 (22.13, 39.33)          | 93.91 (67.87, 120.62)   | 191.88 (138.69, 250.09)            |
| <b>Albania</b>             | 28.96                    | 17.1                                   | 1.65 (1.17, 2.18)             | 56.86 (40.23, 75.34)    | 46.27 (32.73, 60.97)               |
| <b>Algeria</b>             | 396.35                   | 30.9                                   | 46.28 (33.81, 59.58)          | 116.77 (85.31, 150.32)  | 148.29 (108.18, 191.08)            |
| <b>American Samoa</b>      | 0.83                     | 3.7                                    | 0.00 (0.00, 0.00)             | 0.00 (0.00, 5.89)       | 0.00 (0.00, 10.24)                 |
| <b>Andorra</b>             | 0.79                     | 9.7                                    | 0.03 (0.02, 0.04)             | 33.65 (20.56, 51.06)    | 18.26 (11.18, 27.50)               |
| <b>Angola</b>              | 252.51                   | 29.1                                   | 18.63 (13.45, 23.93)          | 73.78 (53.28, 94.77)    | 167.03 (120.40, 218.54)            |
| <b>Antigua and Barbuda</b> | 0.92                     | 12.8                                   | 0.05 (0.03, 0.07)             | 52.16 (35.28, 72.37)    | 56.86 (38.55, 78.89)               |
| <b>Argentina</b>           | 434.13                   | 13                                     | 25.33 (17.07, 35.06)          | 58.35 (39.31, 80.76)    | 54.36 (37.06, 75.23)               |
| <b>Armenia</b>             | 30.08                    | 21.2                                   | 5.14 (3.62, 6.79)             | 170.82 (120.49, 225.62) | 146.08 (104.36, 192.99)            |
| <b>Australia</b>           | 243.22                   | 5.8                                    | 3.00 (0.00, 6.77)             | 12.32 (0.00, 27.83)     | 8.58 (0.00, 19.34)                 |
| <b>Austria</b>             | 86.70                    | 16.7                                   | 8.46 (5.94, 11.25)            | 97.63 (68.55, 129.71)   | 55.12 (38.79, 72.98)               |
| <b>Azerbaijan</b>          | 97.82                    | 25.6                                   | 13.61 (9.72, 17.82)           | 139.17 (99.35, 182.22)  | 162.21 (116.83, 212.80)            |
| <b>Bahrain</b>             | 13.67                    | 54.4                                   | 1.18 (0.86, 1.53)             | 86.54 (62.67, 112.18)   | 134.55 (97.69, 173.40)             |
| <b>Bangladesh</b>          | 1609.58                  | 87                                     | 136.17 (99.56, 174.46)        | 84.60 (61.86, 108.39)   | 121.08 (88.55, 156.18)             |
| <b>Barbados</b>            | 2.84                     | 14.1                                   | 0.23 (0.16, 0.31)             | 80.43 (55.70, 110.22)   | 58.71 (40.65, 79.70)               |
| <b>Belarus</b>             | 96.12                    | 17.9                                   | 12.27 (8.63, 16.39)           | 127.67 (89.75, 170.57)  | 90.45 (63.46, 120.31)              |
| <b>Belgium</b>             | 113.33                   | 15.3                                   | 8.55 (5.98, 11.60)            | 75.47 (52.75, 102.36)   | 43.74 (30.54, 59.11)               |
| <b>Belize</b>              | 3.59                     | 23.2                                   | 0.25 (0.18, 0.32)             | 69.68 (50.71, 89.18)    | 119.56 (86.74, 154.56)             |

|                                 |          |      |                         |                         |                         |
|---------------------------------|----------|------|-------------------------|-------------------------|-------------------------|
| <b>Benin</b>                    | 109.14   | 29.1 | 13.03 (9.45, 16.83)     | 119.42 (86.55, 154.23)  | 221.80 (158.67, 288.49) |
| <b>Bermuda</b>                  | 0.67     | 8.5  | 0.02 (0.01, 0.03)       | 23.70 (13.38, 37.60)    | 24.27 (13.58, 38.49)    |
| <b>Bhutan</b>                   | 7.75     | 54.1 | 0.63 (0.46, 0.81)       | 81.62 (59.15, 105.14)   | 117.58 (85.02, 151.93)  |
| <b>Bolivia</b>                  | 107.67   | 27.1 | 7.88 (5.73, 10.12)      | 73.15 (53.26, 93.97)    | 103.87 (75.28, 133.54)  |
| <b>Bosnia and Herzegovina</b>   | 38.11    | 45.3 | 3.47 (2.50, 4.50)       | 91.07 (65.52, 118.05)   | 61.29 (44.32, 79.04)    |
| <b>Botswana</b>                 | 22.59    | 15.4 | 2.05 (1.42, 2.76)       | 90.88 (62.78, 122.29)   | 141.70 (98.19, 191.81)  |
| <b>Brazil</b>                   | 2078.47  | 11.1 | 69.03 (45.11, 99.44)    | 33.21 (21.70, 47.84)    | 36.57 (23.68, 52.72)    |
| <b>Brunei</b>                   | 4.23     | 5    | 0.01 (0.00, 0.05)       | 3.42 (0.00, 11.43)      | 5.19 (0.00, 17.16)      |
| <b>Bulgaria</b>                 | 72.68    | 27.5 | 7.64 (5.50, 9.91)       | 105.13 (75.64, 136.35)  | 62.62 (45.69, 80.52)    |
| <b>Burkina Faso</b>             | 180.94   | 33.6 | 18.04 (13.04, 23.17)    | 99.72 (72.06, 128.05)   | 207.57 (150.31, 269.84) |
| <b>Burundi</b>                  | 112.47   | 37.1 | 9.66 (7.00, 12.41)      | 85.85 (62.26, 110.31)   | 177.62 (128.26, 231.63) |
| <b>Cambodia</b>                 | 155.92   | 23.9 | 5.78 (4.23, 7.39)       | 37.07 (27.10, 47.42)    | 56.89 (41.44, 72.76)    |
| <b>Cameroon</b>                 | 234.01   | 64   | 24.23 (17.60, 31.15)    | 103.53 (75.22, 133.13)  | 198.36 (144.84, 256.55) |
| <b>Canada</b>                   | 361.46   | 7    | 8.34 (3.40, 15.08)      | 23.07 (9.40, 41.72)     | 15.02 (6.10, 27.17)     |
| <b>Cape Verde</b>               | 5.20     | 35.2 | 0.75 (0.54, 0.96)       | 143.34 (104.72, 184.95) | 214.86 (154.68, 277.73) |
| <b>Central African Republic</b> | 49.03    | 38.3 | 4.79 (3.47, 6.14)       | 97.60 (70.67, 125.21)   | 171.43 (124.31, 223.21) |
| <b>Chad</b>                     | 140.63   | 39.6 | 14.46 (10.50, 18.54)    | 102.83 (74.64, 131.86)  | 220.58 (157.76, 287.17) |
| <b>Chile</b>                    | 179.48   | 20.6 | 18.72 (13.36, 24.39)    | 104.29 (74.42, 135.90)  | 91.45 (65.70, 118.71)   |
| <b>China</b>                    | 13834.71 | 57.2 | 766.73 (558.72, 985.14) | 55.42 (40.39, 71.21)    | 48.98 (35.52, 63.01)    |
| <b>Colombia</b>                 | 482.64   | 17.6 | 49.09 (34.74, 65.16)    | 101.71 (71.98, 135.00)  | 116.74 (82.49, 155.15)  |
| <b>Comoros</b>                  | 7.92     | 16.1 | 0.50 (0.35, 0.67)       | 63.64 (44.53, 84.92)    | 117.38 (81.93, 157.82)  |
| <b>Congo</b>                    | 46.29    | 42.3 | 4.48 (3.28, 5.75)       | 96.77 (70.88, 124.13)   | 176.51 (127.77, 229.52) |
| <b>Costa Rica</b>               | 48.09    | 19.7 | 6.86 (4.89, 9.01)       | 142.69 (101.73, 187.28) | 143.54 (102.27, 187.39) |

|                                         |        |      |                        |                         |                         |
|-----------------------------------------|--------|------|------------------------|-------------------------|-------------------------|
| <b>Cote d'Ivoire</b>                    | 226.88 | 19.8 | 26.91 (19.33, 35.11)   | 118.62 (85.19, 154.73)  | 214.13 (152.49, 280.67) |
| <b>Croatia</b>                          | 42.41  | 21.2 | 4.09 (2.91, 5.35)      | 96.50 (68.56, 126.11)   | 57.30 (41.40, 74.38)    |
| <b>Cuba</b>                             | 113.93 | 16.4 | 8.51 (5.99, 11.35)     | 74.69 (52.60, 99.60)    | 54.54 (38.26, 72.87)    |
| <b>Cyprus</b>                           | 8.92   | 17.9 | 0.75 (0.52, 0.99)      | 83.56 (58.73, 111.25)   | 61.89 (43.91, 82.30)    |
| <b>Czech Republic</b>                   | 106.97 | 21   | 9.13 (6.57, 11.84)     | 85.32 (61.46, 110.71)   | 53.89 (39.00, 69.54)    |
| <b>Democratic Republic of the Congo</b> | 774.14 | 38.7 | 59.51 (43.52, 76.68)   | 76.87 (56.22, 99.06)    | 160.32 (115.41, 208.74) |
| <b>Denmark</b>                          | 57.11  | 10.7 | 2.62 (1.68, 3.83)      | 45.79 (29.35, 67.00)    | 27.06 (17.47, 39.28)    |
| <b>Djibouti</b>                         | 8.90   | 39.1 | 0.90 (0.65, 1.16)      | 101.59 (73.49, 130.67)  | 168.86 (121.39, 218.42) |
| <b>Dominica</b>                         | 0.72   | 12.5 | 0.04 (0.03, 0.06)      | 58.81 (39.96, 82.15)    | 60.71 (41.15, 84.09)    |
| <b>Dominican Republic</b>               | 105.30 | 18.3 | 6.27 (4.47, 8.19)      | 59.57 (42.47, 77.75)    | 75.11 (53.80, 98.40)    |
| <b>Ecuador</b>                          | 161.54 | 12.5 | 6.81 (4.60, 9.48)      | 42.14 (28.51, 58.65)    | 54.52 (36.79, 75.88)    |
| <b>Egypt</b>                            | 911.48 | 99.5 | 115.58 (84.09, 148.52) | 126.81 (92.26, 162.95)  | 172.28 (124.99, 221.03) |
| <b>El Salvador</b>                      | 61.37  | 35.5 | 12.72 (9.33, 16.10)    | 207.27 (152.01, 262.25) | 243.44 (178.28, 309.30) |
| <b>Equatorial Guinea</b>                | 8.45   | 34   | 0.88 (0.63, 1.15)      | 103.85 (74.40, 135.90)  | 168.82 (121.56, 218.53) |
| <b>Eritrea</b>                          | 52.42  | 35.3 | 4.44 (3.22, 5.72)      | 84.61 (61.49, 109.10)   | 174.25 (125.86, 225.66) |
| <b>Estonia</b>                          | 13.54  | 9.1  | 1.00 (0.58, 1.55)      | 73.50 (42.99, 114.07)   | 44.54 (26.14, 69.71)    |
| <b>Ethiopia</b>                         | 994.32 | 30.1 | 91.51 (66.04, 117.62)  | 92.04 (66.42, 118.29)   | 175.10 (126.30, 227.38) |
| <b>Federated States of Micronesia</b>   | 1.05   | 6.1  | 0.01 (0.00, 0.02)      | 9.86 (1.48, 20.72)      | 15.19 (2.27, 31.50)     |
| <b>Fiji</b>                             | 8.92   | 6    | 0.12 (0.01, 0.26)      | 13.54 (1.36, 29.07)     | 16.03 (1.64, 34.27)     |
| <b>Finland</b>                          | 55.50  | 7.2  | 1.05 (0.46, 1.85)      | 19.00 (8.29, 33.37)     | 10.38 (4.56, 18.38)     |
| <b>France</b>                           | 652.32 | 12.1 | 33.11 (21.98, 46.89)   | 50.76 (33.69, 71.89)    | 28.24 (18.87, 39.78)    |
| <b>Gabon</b>                            | 17.26  | 31.3 | 1.82 (1.32, 2.34)      | 105.61 (76.30, 135.79)  | 168.43 (121.79, 218.50) |
| <b>Georgia</b>                          | 40.04  | 19.7 | 6.69 (4.78, 8.74)      | 167.15 (119.41, 218.39) | 132.27 (93.99, 172.71)  |
| <b>Germany</b>                          | 836.28 | 13.7 | 70.93 (47.89, 98.80)   | 84.82 (57.26, 118.14)   | 42.05 (28.94, 57.72)    |

|                      |          |      |                             |                         |                         |
|----------------------|----------|------|-----------------------------|-------------------------|-------------------------|
| <b>Ghana</b>         | 274.17   | 21.7 | 35.82 (26.00, 46.10)        | 130.65 (94.84, 168.16)  | 219.77 (158.78, 286.91) |
| <b>Greece</b>        | 109.22   | 13.2 | 8.16 (5.53, 11.34)          | 74.69 (50.68, 103.84)   | 38.26 (26.00, 52.72)    |
| <b>Greenland</b>     | 0.54     | 5.2  | 0.00 (0.00, 0.01)           | 5.33 (0.00, 15.58)      | 6.07 (0.00, 17.59)      |
| <b>Grenada</b>       | 1.07     | 14   | 0.06 (0.04, 0.08)           | 58.26 (40.14, 79.38)    | 70.08 (47.80, 96.05)    |
| <b>Guam</b>          | 1.70     | 6.8  | 0.03 (0.01, 0.05)           | 15.82 (5.83, 29.24)     | 16.30 (5.94, 29.82)     |
| <b>Guatemala</b>     | 163.55   | 33.9 | 19.67 (14.34, 25.39)        | 120.29 (87.70, 155.27)  | 209.74 (152.42, 272.81) |
| <b>Guinea</b>        | 125.74   | 19.3 | 13.72 (9.81, 17.89)         | 109.14 (78.05, 142.26)  | 195.33 (139.44, 258.00) |
| <b>Guinea-Bissau</b> | 18.48    | 26   | 2.72 (1.98, 3.50)           | 147.24 (107.14, 189.25) | 253.89 (183.23, 327.77) |
| <b>Guyana</b>        | 7.70     | 14.8 | 0.42 (0.29, 0.57)           | 54.46 (37.90, 73.60)    | 69.92 (48.64, 94.71)    |
| <b>Haiti</b>         | 107.21   | 22.1 | 7.40 (5.39, 9.51)           | 69.04 (50.28, 88.68)    | 112.63 (81.88, 145.09)  |
| <b>Honduras</b>      | 80.96    | 36.2 | 9.80 (7.08, 12.66)          | 120.98 (87.47, 156.34)  | 201.06 (144.40, 263.01) |
| <b>Hungary</b>       | 101.68   | 22.6 | 9.99 (7.20, 12.89)          | 98.26 (70.81, 126.78)   | 60.80 (44.16, 78.35)    |
| <b>Iceland</b>       | 3.26     | 7.5  | 0.05 (0.02, 0.09)           | 15.35 (7.31, 26.30)     | 11.32 (5.40, 19.37)     |
| <b>India</b>         | 13116.32 | 72.6 | 1,092.52 (791.38, 1,407.28) | 83.30 (60.34, 107.29)   | 108.21 (77.99, 139.22)  |
| <b>Indonesia</b>     | 2576.21  | 15   | 76.81 (53.66, 103.42)       | 29.81 (20.83, 40.15)    | 37.38 (26.05, 50.06)    |
| <b>Iran</b>          | 790.34   | 42   | 91.01 (65.99, 117.28)       | 115.16 (83.50, 148.39)  | 149.19 (108.02, 191.81) |
| <b>Iraq</b>          | 364.21   | 45.2 | 34.71 (25.24, 44.66)        | 95.31 (69.31, 122.62)   | 188.02 (137.00, 243.23) |
| <b>Ireland</b>       | 47.90    | 9.6  | 1.35 (0.83, 2.04)           | 28.24 (17.35, 42.64)    | 21.79 (13.38, 32.85)    |
| <b>Israel</b>        | 80.49    | 20.7 | 7.79 (5.61, 10.15)          | 96.73 (69.68, 126.13)   | 87.85 (62.89, 113.70)   |
| <b>Italy</b>         | 627.97   | 19.5 | 72.58 (51.77, 95.43)        | 115.58 (82.44, 151.96)  | 56.46 (40.37, 73.98)    |
| <b>Jamaica</b>       | 28.30    | 16.6 | 2.02 (1.43, 2.69)           | 71.31 (50.64, 94.92)    | 75.34 (53.45, 100.21)   |
| <b>Japan</b>         | 1283.06  | 13.1 | 134.56 (91.13, 186.81)      | 104.88 (71.03, 145.60)  | 44.79 (30.61, 61.70)    |
| <b>Jordan</b>        | 75.71    | 38   | 6.94 (5.06, 8.91)           | 91.72 (66.84, 117.67)   | 158.36 (114.70, 206.05) |



|                         |         |      |                         |                         |                         |
|-------------------------|---------|------|-------------------------|-------------------------|-------------------------|
| <b>Kazakhstan</b>       | 175.37  | 17   | 18.92 (13.23, 25.33)    | 107.86 (75.47, 144.46)  | 125.62 (88.13, 168.39)  |
| <b>Kenya</b>            | 461.90  | 15.6 | 22.91 (16.02, 30.63)    | 49.61 (34.68, 66.30)    | 99.34 (69.68, 134.28)   |
| <b>Kiribati</b>         | 1.13    | 3.4  | 0.00 (0.00, 0.01)       | 0.00 (0.00, 4.53)       | 0.00 (0.00, 7.19)       |
| <b>Kuwait</b>           | 39.01   | 65.7 | 2.99 (2.16, 3.87)       | 76.55 (55.33, 99.19)    | 128.44 (93.49, 165.90)  |
| <b>Kyrgyzstan</b>       | 58.94   | 16.1 | 4.19 (2.93, 5.63)       | 71.15 (49.79, 95.51)    | 103.57 (72.70, 139.25)  |
| <b>Laos</b>             | 67.99   | 27.9 | 2.60 (1.90, 3.30)       | 38.18 (27.97, 48.59)    | 64.96 (47.36, 83.09)    |
| <b>Latvia</b>           | 22.12   | 19.8 | 4.22 (2.98, 5.57)       | 190.58 (134.74, 251.78) | 114.09 (81.29, 150.57)  |
| <b>Lebanon</b>          | 57.62   | 31.8 | 6.04 (4.39, 7.77)       | 104.81 (76.23, 134.81)  | 112.01 (81.21, 144.48)  |
| <b>Lesotho</b>          | 21.29   | 18.6 | 2.38 (1.69, 3.13)       | 111.68 (79.43, 146.90)  | 195.68 (137.71, 258.63) |
| <b>Liberia</b>          | 45.08   | 7.4  | 1.17 (0.54, 2.03)       | 25.96 (12.07, 44.95)    | 46.88 (21.90, 81.55)    |
| <b>Libya</b>            | 62.95   | 69.4 | 6.90 (5.00, 8.86)       | 109.60 (79.50, 140.70)  | 149.84 (107.92, 192.76) |
| <b>Lithuania</b>        | 31.53   | 18.6 | 4.98 (3.52, 6.62)       | 157.85 (111.58, 209.91) | 96.99 (68.86, 127.38)   |
| <b>Luxembourg</b>       | 5.56    | 16.2 | 0.37 (0.26, 0.49)       | 65.91 (46.31, 88.37)    | 46.84 (32.97, 62.57)    |
| <b>Macedonia</b>        | 20.78   | 39.4 | 1.59 (1.15, 2.05)       | 76.57 (55.11, 98.54)    | 60.24 (43.70, 77.65)    |
| <b>Madagascar</b>       | 241.92  | 18.7 | 16.14 (11.53, 21.02)    | 66.71 (47.66, 86.88)    | 129.22 (91.66, 171.24)  |
| <b>Malawi</b>           | 172.14  | 21.4 | 12.44 (9.00, 16.02)     | 72.25 (52.30, 93.06)    | 155.47 (111.87, 203.05) |
| <b>Malaysia</b>         | 302.96  | 15.1 | 9.37 (6.58, 12.70)      | 30.91 (21.73, 41.93)    | 38.23 (26.77, 51.34)    |
| <b>Maldives</b>         | 3.63    | 28.5 | 0.16 (0.12, 0.21)       | 44.47 (32.46, 56.71)    | 65.13 (47.34, 82.98)    |
| <b>Mali</b>             | 175.68  | 37.2 | 17.90 (13.06, 22.97)    | 101.91 (74.36, 130.73)  | 215.28 (154.81, 278.99) |
| <b>Malta</b>            | 4.18    | 15.4 | 0.35 (0.24, 0.47)       | 83.52 (57.98, 113.42)   | 48.42 (33.48, 65.19)    |
| <b>Marshall Islands</b> | 0.72    | 9.1  | 0.02 (0.01, 0.03)       | 27.01 (16.13, 41.20)    | 46.11 (27.31, 71.02)    |
| <b>Mauritania</b>       | 40.85   | 68.5 | 5.39 (3.89, 6.93)       | 131.84 (95.23, 169.69)  | 221.28 (159.05, 287.45) |
| <b>Mauritius</b>        | 12.74   | 14.4 | 0.95 (0.66, 1.28)       | 74.40 (51.72, 100.81)   | 64.63 (44.84, 86.96)    |
| <b>Mexico</b>           | 1270.43 | 19.7 | 205.87 (147.95, 269.30) | 162.05 (116.46, 211.98) | 206.44 (147.97, 269.37) |
| <b>Moldova</b>          | 40.65   | 16.7 | 3.99 (2.77, 5.36)       | 98.14 (68.25, 131.75)   | 82.08 (57.78, 110.01)   |

|                                 |         |      |                         |                         |                         |
|---------------------------------|---------|------|-------------------------|-------------------------|-------------------------|
| <b>Mongolia</b>                 | 29.53   | 22.9 | 3.53 (2.55, 4.58)       | 119.47 (86.18, 155.07)  | 182.35 (130.58, 237.33) |
| <b>Montenegro</b>               | 6.26    | 22.7 | 0.57 (0.41, 0.74)       | 91.15 (65.81, 118.31)   | 68.28 (49.58, 88.70)    |
| <b>Morocco</b>                  | 343.73  | 22.4 | 28.75 (20.79, 37.13)    | 83.65 (60.47, 108.03)   | 97.08 (70.31, 125.02)   |
| <b>Mozambique</b>               | 279.91  | 17   | 18.20 (12.87, 24.04)    | 65.02 (45.96, 85.87)    | 130.12 (91.54, 172.57)  |
| <b>Myanmar</b>                  | 540.27  | 53   | 28.44 (20.70, 36.47)    | 52.64 (38.32, 67.51)    | 65.80 (47.73, 84.55)    |
| <b>Namibia</b>                  | 24.53   | 18.6 | 2.10 (1.50, 2.76)       | 85.72 (61.13, 112.35)   | 147.88 (104.50, 196.98) |
| <b>Nepal</b>                    | 285.51  | 70.9 | 33.03 (23.92, 42.72)    | 115.68 (83.79, 149.62)  | 163.61 (118.20, 211.43) |
| <b>Netherlands</b>              | 171.91  | 14.3 | 9.73 (6.73, 13.38)      | 56.63 (39.12, 77.82)    | 33.72 (23.31, 46.04)    |
| <b>New Zealand</b>              | 45.63   | 5.4  | 0.45 (0.00, 1.16)       | 9.76 (0.00, 25.40)      | 6.86 (0.00, 17.63)      |
| <b>Nicaragua</b>                | 60.89   | 23   | 8.80 (6.38, 11.37)      | 144.51 (104.85, 186.69) | 212.72 (153.46, 276.70) |
| <b>Niger</b>                    | 198.54  | 53   | 20.96 (15.19, 27.02)    | 105.56 (76.52, 136.07)  | 215.31 (154.91, 278.75) |
| <b>Nigeria</b>                  | 1824.90 | 36.9 | 195.23 (141.44, 250.95) | 106.98 (77.51, 137.52)  | 200.28 (145.24, 261.20) |
| <b>North Korea</b>              | 251.59  | 27.7 | 15.12 (10.90, 19.59)    | 60.11 (43.32, 77.88)    | 61.34 (44.58, 78.87)    |
| <b>Northern Mariana Islands</b> | 1.16    | 11.3 | 0.02 (0.02, 0.03)       | 20.67 (13.49, 29.40)    | 47.95 (31.41, 68.33)    |
| <b>Norway</b>                   | 51.64   | 8.9  | 1.11 (0.65, 1.74)       | 21.54 (12.50, 33.61)    | 13.87 (8.09, 21.62)     |
| <b>Oman</b>                     | 44.81   | 46.7 | 3.36 (2.44, 4.29)       | 74.90 (54.42, 95.71)    | 131.54 (95.01, 170.75)  |
| <b>Pakistan</b>                 | 1890.55 | 63   | 107.43 (78.85, 137.04)  | 56.83 (41.71, 72.49)    | 89.17 (64.66, 114.14)   |
| <b>Palestine</b>                | 46.73   | 20.1 | 3.83 (2.75, 4.94)       | 81.87 (58.75, 105.74)   | 165.02 (118.93, 215.20) |
| <b>Panama</b>                   | 39.29   | 12.6 | 2.89 (1.94, 4.05)       | 73.68 (49.45, 103.06)   | 85.49 (57.25, 120.64)   |
| <b>Papua New Guinea</b>         | 76.33   | 10.4 | 1.86 (1.19, 2.72)       | 24.39 (15.57, 35.63)    | 43.51 (27.83, 63.68)    |
| <b>Paraguay</b>                 | 66.53   | 14.3 | 2.90 (1.99, 3.95)       | 43.61 (29.95, 59.33)    | 61.17 (41.81, 82.87)    |
| <b>Peru</b>                     | 313.93  | 27.1 | 19.31 (14.05, 24.91)    | 61.52 (44.75, 79.35)    | 79.54 (57.72, 103.29)   |
| <b>Philippines</b>              | 1008.03 | 22.8 | 54.04 (39.68, 68.69)    | 53.61 (39.36, 68.14)    | 74.76 (54.64, 94.99)    |
| <b>Poland</b>                   | 389.13  | 23.8 | 40.53 (29.17, 52.81)    | 104.15 (74.95, 135.72)  | 70.38 (51.26, 90.87)    |
| <b>Portugal</b>                 | 108.00  | 9.5  | 3.85 (2.33, 5.84)       | 35.69 (21.59, 54.08)    | 18.78 (11.47, 28.35)    |

|                                         |         |       |                         |                         |                         |
|-----------------------------------------|---------|-------|-------------------------|-------------------------|-------------------------|
| <b>Puerto Rico</b>                      | 36.84   | 16.7  | 3.73 (2.64, 4.96)       | 101.27 (71.69, 134.66)  | 76.26 (53.86, 101.30)   |
| <b>Qatar</b>                            | 22.21   | 104.2 | 1.46 (1.06, 1.89)       | 65.88 (47.52, 84.97)    | 128.63 (92.66, 166.35)  |
| <b>Romania</b>                          | 195.27  | 19.2  | 15.83 (11.38, 20.56)    | 81.06 (58.28, 105.29)   | 51.90 (37.43, 67.35)    |
| <b>Russia</b>                           | 1481.18 | 15.8  | 170.89 (118.90, 229.76) | 115.38 (80.27, 155.12)  | 82.87 (57.99, 111.67)   |
| <b>Rwanda</b>                           | 116.31  | 41.3  | 8.71 (6.31, 11.23)      | 74.88 (54.22, 96.59)    | 151.70 (109.39, 196.85) |
| <b>Saint Lucia</b>                      | 1.85    | 13.1  | 0.11 (0.07, 0.15)       | 57.56 (39.30, 79.12)    | 57.71 (39.45, 80.03)    |
| <b>Saint Vincent and the Grenadines</b> | 1.10    | 13.2  | 0.06 (0.04, 0.08)       | 54.25 (36.90, 74.94)    | 60.38 (40.98, 83.45)    |
| <b>Samoa</b>                            | 1.94    | 3.7   | 0.00 (0.00, 0.01)       | 0.00 (0.00, 6.72)       | 0.00 (0.00, 10.11)      |
| <b>Sao Tome and Principe</b>            | 1.91    | 12.6  | 0.15 (0.10, 0.21)       | 80.10 (54.07, 111.56)   | 150.88 (101.15, 210.56) |
| <b>Saudi Arabia</b>                     | 314.35  | 102.9 | 30.70 (22.09, 39.58)    | 97.66 (70.26, 125.92)   | 150.52 (109.32, 194.82) |
| <b>Senegal</b>                          | 151.09  | 36.4  | 18.32 (13.34, 23.49)    | 121.23 (88.29, 155.47)  | 232.28 (166.70, 300.78) |
| <b>Serbia</b>                           | 88.56   | 20.8  | 6.93 (4.96, 9.08)       | 78.30 (56.00, 102.53)   | 50.81 (36.59, 66.12)    |
| <b>Seychelles</b>                       | 0.97    | 12.7  | 0.03 (0.02, 0.04)       | 32.68 (22.05, 45.29)    | 34.25 (23.23, 47.29)    |
| <b>Sierra Leone</b>                     | 64.62   | 15    | 5.21 (3.60, 7.02)       | 80.61 (55.73, 108.68)   | 150.18 (103.40, 203.74) |
| <b>Singapore</b>                        | 39.24   | 17.7  | 2.96 (2.09, 3.91)       | 75.44 (53.39, 99.60)    | 60.15 (42.54, 79.62)    |
| <b>Slovakia</b>                         | 55.55   | 20.1  | 4.34 (3.10, 5.65)       | 78.13 (55.88, 101.78)   | 56.44 (40.57, 73.37)    |
| <b>Slovenia</b>                         | 20.63   | 19.9  | 1.58 (1.12, 2.06)       | 76.60 (54.28, 99.90)    | 45.64 (32.80, 59.31)    |
| <b>Solomon Islands</b>                  | 5.86    | 5.2   | 0.03 (0.00, 0.08)       | 4.78 (0.00, 13.86)      | 8.83 (0.00, 25.48)      |
| <b>Somalia</b>                          | 108.49  | 16.7  | 7.39 (5.20, 9.81)       | 68.15 (47.95, 90.38)    | 133.98 (93.74, 179.48)  |
| <b>South Africa</b>                     | 537.24  | 28.9  | 83.45 (60.96, 107.82)   | 155.34 (113.48, 200.68) | 203.05 (146.97, 262.13) |
| <b>South Korea</b>                      | 502.83  | 28.1  | 42.98 (31.24, 55.16)    | 85.48 (62.13, 109.71)   | 62.81 (46.10, 80.28)    |
| <b>South Sudan</b>                      | 122.88  | 28.4  | 10.34 (7.48, 13.34)     | 84.15 (60.87, 108.54)   | 168.75 (121.86, 219.39) |
| <b>Spain</b>                            | 487.51  | 9.6   | 28.19 (17.24, 42.67)    | 57.82 (35.37, 87.52)    | 33.08 (20.25, 49.77)    |
| <b>Sri Lanka</b>                        | 207.48  | 26.4  | 13.44 (9.77, 17.25)     | 64.80 (47.07, 83.15)    | 62.19 (45.41, 79.45)    |

|                             |         |      |                         |                         |                         |
|-----------------------------|---------|------|-------------------------|-------------------------|-------------------------|
| <b>Sudan</b>                | 403.89  | 42.3 | 36.09 (26.23, 46.46)    | 89.36 (64.93, 115.04)   | 156.64 (112.55, 203.44) |
| <b>Suriname</b>             | 5.43    | 15.2 | 0.36 (0.25, 0.48)       | 66.06 (46.23, 88.46)    | 77.26 (53.87, 103.80)   |
| <b>Swaziland</b>            | 12.89   | 17.8 | 1.29 (0.90, 1.70)       | 99.81 (70.16, 131.93)   | 186.40 (131.74, 247.70) |
| <b>Sweden</b>               | 98.08   | 6.1  | 1.23 (0.18, 2.60)       | 12.55 (1.88, 26.47)     | 6.94 (1.03, 14.50)      |
| <b>Switzerland</b>          | 82.78   | 12.6 | 6.43 (4.30, 9.01)       | 77.64 (52.00, 108.88)   | 46.31 (30.85, 64.65)    |
| <b>Syria</b>                | 186.22  | 35.8 | 14.88 (10.81, 19.15)    | 79.89 (58.04, 102.85)   | 125.13 (90.21, 162.01)  |
| <b>Tajikistan</b>           | 85.01   | 41.3 | 6.87 (4.95, 8.91)       | 80.82 (58.28, 104.85)   | 145.74 (105.87, 189.20) |
| <b>Tanzania</b>             | 533.73  | 22   | 41.03 (29.90, 52.63)    | 76.87 (56.01, 98.61)    | 155.44 (112.27, 201.32) |
| <b>Thailand</b>             | 678.94  | 25.8 | 62.03 (45.04, 80.16)    | 91.36 (66.34, 118.07)   | 75.85 (55.19, 97.24)    |
| <b>The Bahamas</b>          | 3.87    | 12.6 | 0.20 (0.14, 0.28)       | 52.86 (35.40, 73.21)    | 54.03 (36.14, 75.68)    |
| <b>The Gambia</b>           | 20.01   | 39.7 | 2.00 (1.46, 2.59)       | 100.04 (72.77, 129.46)  | 214.82 (154.65, 277.45) |
| <b>Timor-Leste</b>          | 11.90   | 14.4 | 0.25 (0.18, 0.34)       | 21.32 (14.75, 28.69)    | 34.59 (23.89, 47.05)    |
| <b>Togo</b>                 | 73.03   | 26   | 9.06 (6.57, 11.67)      | 124.04 (89.92, 159.87)  | 227.28 (163.83, 296.75) |
| <b>Tonga</b>                | 1.07    | 3.9  | 0.00 (0.00, 0.01)       | 0.00 (0.00, 7.65)       | 0.00 (0.00, 11.18)      |
| <b>Trinidad and Tobago</b>  | 13.61   | 13.1 | 0.90 (0.61, 1.25)       | 66.18 (45.16, 91.60)    | 60.51 (41.36, 83.84)    |
| <b>Tunisia</b>              | 112.50  | 43.2 | 15.05 (10.93, 19.50)    | 133.82 (97.17, 173.35)  | 138.75 (101.14, 179.30) |
| <b>Turkey</b>               | 784.20  | 35.6 | 149.34 (107.89, 193.37) | 190.43 (137.58, 246.58) | 205.17 (148.13, 266.16) |
| <b>Turkmenistan</b>         | 53.81   | 26.7 | 6.22 (4.49, 8.05)       | 115.65 (83.43, 149.66)  | 173.38 (124.34, 226.28) |
| <b>Uganda</b>               | 391.54  | 57.2 | 26.34 (19.22, 33.74)    | 67.28 (49.09, 86.17)    | 162.19 (117.55, 209.23) |
| <b>Ukraine</b>              | 465.08  | 16.6 | 54.40 (38.42, 73.05)    | 116.97 (82.62, 157.08)  | 78.57 (55.29, 104.13)   |
| <b>United Arab Emirates</b> | 91.45   | 62.2 | 8.16 (5.89, 10.57)      | 89.24 (64.42, 115.58)   | 144.84 (104.05, 188.05) |
| <b>United Kingdom</b>       | 642.44  | 12.2 | 31.84 (21.27, 44.66)    | 49.56 (33.11, 69.52)    | 29.94 (19.98, 42.00)    |
| <b>United States</b>        | 3235.26 | 8.3  | 163.49 (88.76, 262.78)  | 50.53 (27.44, 81.22)    | 35.44 (19.39, 57.44)    |

1  
2  
3  
4  
5  
6  
7  
8  
9  
10  
11  
12  
13  
14  
15  
16  
17  
18  
19  
20  
21  
22  
23  
24  
25  
26  
27  
28  
29  
30  
31  
32  
33  
34  
35  
36  
37  
38  
39  
40  
41  
42  
43  
44  
45  
46  
47

|                                                                                                   |        |      |                      |                         |                         |
|---------------------------------------------------------------------------------------------------|--------|------|----------------------|-------------------------|-------------------------|
| <b>Uruguay</b>                                                                                    | 34.34  | 11.2 | 1.77 (1.14, 2.56)    | 51.47 (33.33, 74.66)    | 37.80 (24.60, 54.33)    |
| <b>Uzbekistan</b>                                                                                 | 299.41 | 33   | 30.79 (22.37, 39.65) | 102.83 (74.72, 132.42)  | 146.64 (105.09, 191.81) |
| <b>Vanuatu</b>                                                                                    | 2.63   | 6.5  | 0.03 (0.01, 0.05)    | 10.23 (2.99, 19.72)     | 16.78 (4.91, 32.33)     |
| <b>Venezuela</b>                                                                                  | 311.06 | 22.9 | 44.63 (31.94, 58.05) | 143.49 (102.69, 186.63) | 182.63 (131.66, 238.12) |
| <b>Vietnam</b>                                                                                    | 934.72 | 27.3 | 38.83 (28.20, 49.94) | 41.54 (30.17, 53.43)    | 46.79 (33.92, 60.31)    |
| <b>Virgin Islands, U.S.</b>                                                                       | 1.07   | 14.7 | 0.11 (0.07, 0.14)    | 99.44 (68.13, 135.33)   | 63.79 (43.94, 86.41)    |
| <b>Yemen</b>                                                                                      | 269.12 | 40.7 | 22.21 (16.22, 28.54) | 82.52 (60.27, 106.07)   | 166.16 (119.22, 215.67) |
| <b>Zambia</b>                                                                                     | 162.49 | 23.4 | 13.68 (9.94, 17.47)  | 84.19 (61.17, 107.53)   | 183.65 (132.13, 236.56) |
| <b>Zimbabwe</b>                                                                                   | 155.74 | 19.8 | 15.52 (11.18, 20.24) | 99.68 (71.79, 129.93)   | 213.77 (152.75, 280.65) |
| <b>PM<sub>2.5</sub>, Fine particulate matter &lt;2.5 µm; ABD, Attributable burden of disease;</b> |        |      |                      |                         |                         |

**Supplemental Table 2:** Years living with disability (YLD), years of life lost (YLL), and disability adjusted life years (DALY) of chronic kidney disease associated with PM<sub>2.5</sub>.

| Country                    | YLD<br>(in 1000s)                   | YLD<br>(per<br>100,000)    | Age<br>Standardized<br>YLD (per<br>100,000) | YLL<br>(in 1000s)                    | YLL<br>(per<br>100,000)       | Age<br>Standardized<br>YLL<br>(per 100,000) | DALY<br>(in 1000s)                    | DALY<br>(per<br>100,000)      | Age<br>Standardized<br>DALY<br>(per 100,000) |
|----------------------------|-------------------------------------|----------------------------|---------------------------------------------|--------------------------------------|-------------------------------|---------------------------------------------|---------------------------------------|-------------------------------|----------------------------------------------|
| <b>Global</b>              | 2,849.31<br>(1,875.22,<br>3,983.94) | 38.66<br>(25.44,<br>54.05) | 40.97 (26.84,<br>57.11)                     | 8,587.74<br>(6,355.78,<br>10,772.24) | 116.51<br>(86.23,<br>146.14)  | 122.71 (90.36,<br>153.52)                   | 11,445.40<br>(8,380.25,<br>14,554.09) | 155.27<br>(113.69,<br>197.45) | 163.69<br>(120.58,<br>207.28)                |
| <b>Afghanistan</b>         | 15.78<br>(10.35,<br>22.35)          | 48.39<br>(31.75,<br>68.53) | 100.93 (66.66,<br>141.17)                   | 80.86<br>(51.35,<br>116.20)          | 247.97<br>(157.47,<br>356.37) | 516.25<br>(326.37,<br>739.27)               | 96.28<br>(62.90,<br>135.20)           | 295.27<br>(192.91,<br>414.63) | 616.34<br>(408.20,<br>867.27)                |
| <b>Albania</b>             | 0.60 (0.38,<br>0.88)                | 20.80<br>(13.17,<br>30.22) | 17.31 (10.99,<br>24.97)                     | 2.11 (1.44,<br>2.90)                 | 72.97<br>(49.85,<br>100.23)   | 62.69 (43.29,<br>85.74)                     | 2.72 (1.90,<br>3.64)                  | 93.81<br>(65.63,<br>125.67)   | 80.29 (56.13,<br>106.33)                     |
| <b>Algeria</b>             | 22.93<br>(15.02,<br>32.26)          | 57.86<br>(37.91,<br>81.39) | 71.02 (46.64,<br>100.31)                    | 47.83<br>(33.27,<br>63.95)           | 120.68<br>(83.95,<br>161.35)  | 162.94<br>(114.17,<br>217.27)               | 71.00<br>(50.72,<br>92.82)            | 179.14<br>(127.96,<br>234.19) | 233.92<br>(169.67,<br>305.79)                |
| <b>American Samoa</b>      | 0.00 (0.00,<br>0.00)                | 0.00 (0.00,<br>3.32)       | 0.00 (0.00,<br>5.20)                        | 0.00 (0.00,<br>0.02)                 | 0.00 (0.00,<br>20.43)         | 0.00 (0.00,<br>33.64)                       | 0.00 (0.00,<br>0.02)                  | 0.00 (0.00,<br>23.78)         | 0.00 (0.00,<br>38.44)                        |
| <b>Andorra</b>             | 0.01 (0.00,<br>0.01)                | 10.42<br>(5.95,<br>16.83)  | 6.17 (3.51,<br>9.97)                        | 0.01 (0.00,<br>0.02)                 | 11.03<br>(5.28,<br>19.50)     | 5.94 (2.91,<br>10.55)                       | 0.02 (0.01,<br>0.03)                  | 21.70<br>(12.68,<br>34.27)    | 12.19 (7.19,<br>19.18)                       |
| <b>Angola</b>              | 6.58 (4.23,<br>9.46)                | 26.04<br>(16.74,<br>37.48) | 63.19 (40.50,<br>90.77)                     | 11.30<br>(6.78,<br>16.55)            | 44.76<br>(26.84,<br>65.53)    | 87.56 (52.33,<br>129.83)                    | 17.89<br>(12.24,<br>24.49)            | 70.84<br>(48.47,<br>96.97)    | 151.41<br>(104.04,<br>206.44)                |
| <b>Antigua and Barbuda</b> | 0.02 (0.01,<br>0.03)                | 21.07<br>(12.92,<br>31.63) | 22.64 (13.72,<br>34.35)                     | 0.09 (0.06,<br>0.12)                 | 93.37<br>(63.19,<br>130.16)   | 96.98 (65.92,<br>135.53)                    | 0.11 (0.07,<br>0.15)                  | 114.57<br>(77.87,<br>158.29)  | 119.87 (81.10,<br>165.54)                    |
| <b>Argentina</b>           | 10.35<br>(6.52,<br>15.41)           | 23.84<br>(15.02,<br>35.50) | 22.48 (14.23,<br>33.23)                     | 30.57<br>(21.14,<br>41.92)           | 70.43<br>(48.68,<br>96.56)    | 66.09 (45.14,<br>89.95)                     | 41.06<br>(28.15,<br>56.10)            | 94.58<br>(64.84,<br>129.21)   | 88.69 (60.91,<br>121.56)                     |
| <b>Armenia</b>             | 1.92 (1.24,<br>2.74)                | 63.93<br>(41.29,<br>91.25) | 54.32 (35.15,<br>77.48)                     | 2.24 (1.63,<br>2.88)                 | 74.53<br>(54.20,<br>95.72)    | 63.70 (46.31,<br>82.02)                     | 4.17 (2.99,<br>5.45)                  | 138.60<br>(99.27,<br>181.15)  | 118.22 (84.68,<br>154.97)                    |
| <b>Australia</b>           | 0.77 (0.00,<br>1.83)                | 3.17 (0.00,<br>7.54)       | 2.32 (0.00,<br>5.55)                        | 1.51 (0.00,<br>3.37)                 | 6.20 (0.00,<br>13.85)         | 4.11 (0.00,<br>9.20)                        | 2.29 (0.00,<br>5.11)                  | 9.43 (0.00,<br>20.99)         | 6.46 (0.00,<br>14.49)                        |

|                               |                      |                      |                       |                         |                         |                         |                         |                         |                         |
|-------------------------------|----------------------|----------------------|-----------------------|-------------------------|-------------------------|-------------------------|-------------------------|-------------------------|-------------------------|
| <b>Austria</b>                | 2.43 (1.56, 3.50)    | 28.07 (18.02, 40.36) | 16.95 (10.82, 24.67)  | 5.78 (4.12, 7.53)       | 66.71 (47.51, 86.83)    | 35.45 (25.30, 46.46)    | 8.22 (5.88, 10.81)      | 94.85 (67.87, 124.73)   | 52.55 (37.32, 69.02)    |
| <b>Azerbaijan</b>             | 4.67 (2.99, 6.64)    | 47.71 (30.59, 67.91) | 55.28 (35.35, 78.77)  | 10.89 (7.49, 14.76)     | 111.29 (76.59, 150.90)  | 118.28 (82.85, 158.67)  | 15.58 (11.18, 20.48)    | 159.25 (114.27, 209.40) | 173.98 (124.03, 226.28) |
| <b>Bahrain</b>                | 0.63 (0.40, 0.90)    | 46.21 (29.50, 65.98) | 63.69 (42.15, 88.70)  | 1.11 (0.75, 1.54)       | 81.34 (54.67, 112.79)   | 170.51 (112.78, 236.54) | 1.75 (1.23, 2.35)       | 128.14 (89.87, 171.95)  | 234.56 (165.09, 315.29) |
| <b>Bangladesh</b>             | 51.45 (33.04, 72.84) | 31.96 (20.53, 45.25) | 45.58 (28.89, 64.56)  | 168.36 (121.18, 220.47) | 104.60 (75.28, 136.98)  | 137.57 (98.14, 179.69)  | 220.26 (159.56, 283.60) | 136.84 (99.13, 176.20)  | 183.21 (132.76, 236.87) |
| <b>Barbados</b>               | 0.09 (0.05, 0.13)    | 30.39 (18.92, 44.96) | 22.88 (14.36, 33.90)  | 0.33 (0.23, 0.44)       | 115.22 (79.33, 156.08)  | 87.72 (60.74, 118.85)   | 0.41 (0.29, 0.56)       | 145.83 (101.20, 197.33) | 110.85 (76.61, 149.60)  |
| <b>Belarus</b>                | 3.20 (2.00, 4.70)    | 33.32 (20.76, 48.92) | 24.00 (15.01, 35.08)  | 3.21 (2.24, 4.31)       | 33.40 (23.28, 44.86)    | 25.13 (17.48, 33.86)    | 6.42 (4.43, 8.71)       | 66.78 (46.09, 90.63)    | 49.26 (34.10, 66.80)    |
| <b>Belgium</b>                | 2.59 (1.65, 3.76)    | 22.87 (14.56, 33.19) | 14.18 (9.15, 20.36)   | 4.60 (3.24, 6.15)       | 40.62 (28.56, 54.26)    | 21.68 (15.18, 28.86)    | 7.22 (5.04, 9.69)       | 63.75 (44.46, 85.52)    | 35.87 (25.02, 48.10)    |
| <b>Belize</b>                 | 0.10 (0.07, 0.15)    | 29.01 (18.88, 41.13) | 46.41 (29.68, 66.35)  | 0.69 (0.49, 0.91)       | 193.45 (137.33, 254.42) | 309.79 (222.58, 406.03) | 0.80 (0.57, 1.04)       | 222.65 (158.81, 289.88) | 356.94 (258.16, 462.43) |
| <b>Benin</b>                  | 4.31 (2.74, 6.20)    | 39.46 (25.10, 56.81) | 81.61 (52.77, 115.92) | 11.87 (8.18, 16.18)     | 108.76 (74.96, 148.28)  | 172.70 (119.54, 235.01) | 16.26 (11.35, 21.77)    | 148.96 (103.96, 199.48) | 254.04 (178.36, 337.96) |
| <b>Bermuda</b>                | 0.01 (0.00, 0.01)    | 8.40 (4.35, 14.40)   | 8.49 (4.43, 14.75)    | 0.02 (0.01, 0.03)       | 27.68 (15.47, 44.04)    | 28.16 (15.76, 45.10)    | 0.02 (0.01, 0.04)       | 36.12 (20.32, 57.30)    | 36.76 (20.69, 57.92)    |
| <b>Bhutan</b>                 | 0.29 (0.18, 0.41)    | 36.78 (23.66, 52.34) | 52.27 (33.89, 74.69)  | 0.97 (0.62, 1.38)       | 124.89 (79.46, 178.30)  | 168.36 (110.65, 236.69) | 1.25 (0.85, 1.72)       | 161.48 (110.05, 221.36) | 220.68 (151.58, 301.63) |
| <b>Bolivia</b>                | 2.99 (1.94, 4.24)    | 27.82 (18.01, 39.39) | 38.53 (24.81, 54.96)  | 22.30 (14.92, 30.93)    | 207.09 (138.57, 287.29) | 277.03 (182.00, 385.54) | 25.39 (17.43, 34.41)    | 235.85 (161.92, 319.63) | 316.08 (216.87, 431.03) |
| <b>Bosnia and Herzegovina</b> | 1.82 (1.19, 2.58)    | 47.73 (31.24, 67.59) | 32.51 (21.31, 45.52)  | 3.76 (2.67, 5.00)       | 98.66 (70.11, 131.12)   | 67.09 (47.63, 88.75)    | 5.60 (4.02, 7.28)       | 146.96 (105.54, 190.98) | 100.14 (71.90, 129.83)  |



|                                 |                      |                      |                       |                       |                        |                         |                        |                         |                         |
|---------------------------------|----------------------|----------------------|-----------------------|-----------------------|------------------------|-------------------------|------------------------|-------------------------|-------------------------|
| <b>Botswana</b>                 | 0.68 (0.43, 0.98)    | 29.90 (18.95, 43.55) | 48.07 (30.04, 70.85)  | 1.37 (0.63, 2.34)     | 60.71 (27.85, 103.76)  | 102.33 (50.74, 168.91)  | 2.06 (1.20, 3.16)      | 91.07 (52.95, 140.05)   | 151.38 (90.43, 229.77)  |
| <b>Brazil</b>                   | 25.72 (15.29, 39.59) | 12.38 (7.36, 19.05)  | 13.55 (8.11, 20.94)   | 98.88 (65.54, 139.27) | 47.57 (31.53, 67.01)   | 51.17 (34.05, 72.01)    | 124.85 (82.57, 176.65) | 60.07 (39.72, 84.99)    | 64.76 (42.92, 91.88)    |
| <b>Brunei</b>                   | 0.01 (0.00, 0.03)    | 2.32 (0.00, 8.04)    | 2.98 (0.00, 10.53)    | 0.02 (0.00, 0.08)     | 5.56 (0.00, 19.31)     | 7.87 (0.00, 26.63)      | 0.03 (0.00, 0.11)      | 8.00 (0.00, 26.61)      | 10.86 (0.00, 36.48)     |
| <b>Bulgaria</b>                 | 3.47 (2.17, 5.03)    | 47.72 (29.91, 69.20) | 28.59 (18.30, 40.81)  | 8.72 (6.17, 11.52)    | 119.92 (84.89, 158.48) | 77.27 (54.61, 101.87)   | 12.22 (8.79, 15.95)    | 168.11 (120.88, 219.44) | 105.94 (76.14, 137.65)  |
| <b>Burkina Faso</b>             | 6.04 (3.81, 8.75)    | 33.40 (21.06, 48.37) | 78.10 (49.95, 110.78) | 11.88 (8.40, 15.80)   | 65.65 (46.41, 87.30)   | 112.79 (81.92, 144.36)  | 17.97 (12.84, 23.59)   | 99.29 (70.95, 130.37)   | 190.49 (136.55, 249.99) |
| <b>Burundi</b>                  | 3.20 (1.98, 4.65)    | 28.44 (17.61, 41.35) | 62.45 (39.54, 90.32)  | 5.52 (3.77, 7.56)     | 49.05 (33.49, 67.22)   | 86.58 (59.04, 118.33)   | 8.74 (6.21, 11.58)     | 77.67 (55.23, 103.00)   | 149.74 (105.20, 198.10) |
| <b>Cambodia</b>                 | 2.75 (1.77, 3.94)    | 17.66 (11.35, 25.25) | 27.66 (18.20, 39.32)  | 17.78 (12.87, 22.99)  | 114.06 (82.52, 147.46) | 166.02 (120.34, 213.75) | 20.53 (14.88, 26.32)   | 131.69 (95.45, 168.79)  | 194.04 (141.21, 248.37) |
| <b>Cameroon</b>                 | 8.06 (5.11, 11.66)   | 34.44 (21.84, 49.84) | 69.42 (44.47, 100.23) | 29.37 (17.73, 42.92)  | 125.51 (75.78, 183.42) | 185.46 (113.23, 271.03) | 37.47 (25.06, 52.43)   | 160.13 (107.09, 224.05) | 255.04 (167.04, 356.67) |
| <b>Canada</b>                   | 2.63 (1.03, 5.03)    | 7.27 (2.84, 13.91)   | 5.09 (1.98, 9.77)     | 3.88 (1.58, 6.92)     | 10.73 (4.38, 19.14)    | 7.01 (2.86, 12.42)      | 6.55 (2.66, 11.74)     | 18.13 (7.35, 32.48)     | 12.13 (4.95, 21.82)     |
| <b>Cape Verde</b>               | 0.27 (0.18, 0.38)    | 52.09 (33.73, 73.89) | 77.90 (50.53, 111.43) | 0.51 (0.36, 0.68)     | 97.36 (69.06, 129.77)  | 132.17 (93.71, 175.24)  | 0.78 (0.56, 1.02)      | 150.01 (107.45, 196.66) | 210.82 (149.30, 276.52) |
| <b>Central African Republic</b> | 1.80 (1.17, 2.56)    | 36.68 (23.76, 52.20) | 68.27 (43.92, 97.19)  | 3.93 (2.61, 5.41)     | 80.08 (53.30, 110.29)  | 122.68 (82.91, 169.24)  | 5.73 (4.04, 7.62)      | 116.92 (82.30, 155.41)  | 191.79 (133.62, 256.75) |
| <b>Chad</b>                     | 5.12 (3.23, 7.36)    | 36.39 (22.95, 52.30) | 86.75 (54.15, 124.91) | 17.38 (12.11, 23.42)  | 123.61 (86.12, 166.54) | 177.23 (123.76, 236.45) | 22.54 (15.88, 29.84)   | 160.28 (112.95, 212.21) | 264.19 (189.32, 345.78) |
| <b>Chile</b>                    | 8.52 (5.63, 11.92)   | 47.46 (31.36, 66.43) | 41.42 (27.66, 57.65)  | 18.06 (12.01, 25.06)  | 100.60 (66.93, 139.64) | 87.97 (58.58, 122.97)   | 26.54 (18.38, 35.82)   | 147.86 (102.41, 199.56) | 129.54 (90.05, 175.32)  |

|                                         |                               |                            |                          |                                   |                              |                               |                                     |                               |                               |
|-----------------------------------------|-------------------------------|----------------------------|--------------------------|-----------------------------------|------------------------------|-------------------------------|-------------------------------------|-------------------------------|-------------------------------|
| <b>China</b>                            | 462.21<br>(304.57,<br>647.27) | 33.41<br>(22.01,<br>46.79) | 29.12 (19.36,<br>41.01)  | 1,188.22<br>(870.96,<br>1,501.83) | 85.89<br>(62.95,<br>108.56)  | 76.18 (55.93,<br>96.49)       | 1,651.72<br>(1,212.35,<br>2,103.21) | 119.39<br>(87.63,<br>152.02)  | 105.79 (77.30,<br>133.98)     |
| <b>Colombia</b>                         | 14.77<br>(9.60,<br>20.92)     | 30.61<br>(19.89,<br>43.34) | 34.79 (22.95,<br>49.73)  | 37.69<br>(26.69,<br>49.38)        | 78.08<br>(55.30,<br>102.32)  | 92.36 (65.62,<br>121.19)      | 52.45<br>(37.36,<br>68.94)          | 108.66<br>(77.41,<br>142.84)  | 127.67 (90.79,<br>167.02)     |
| <b>Comoros</b>                          | 0.20 (0.12,<br>0.30)          | 25.43<br>(15.55,<br>37.83) | 48.98 (29.85,<br>73.12)  | 0.25 (0.13,<br>0.39)              | 31.35<br>(17.02,<br>49.22)   | 53.86 (29.18,<br>84.89)       | 0.45 (0.29,<br>0.65)                | 56.76<br>(36.33,<br>81.83)    | 103.08 (66.46,<br>149.18)     |
| <b>Congo</b>                            | 1.55 (0.99,<br>2.20)          | 33.48<br>(21.39,<br>47.46) | 64.04 (41.27,<br>91.07)  | 2.68 (1.76,<br>3.74)              | 57.90<br>(37.97,<br>80.80)   | 100.69 (65.77,<br>141.75)     | 4.24 (2.96,<br>5.74)                | 91.63<br>(64.03,<br>124.09)   | 165.95<br>(114.47,<br>222.62) |
| <b>Costa Rica</b>                       | 1.89 (1.22,<br>2.73)          | 39.40<br>(25.33,<br>56.70) | 39.80 (25.50,<br>56.91)  | 6.49 (4.71,<br>8.39)              | 135.03<br>(98.02,<br>174.38) | 134.89 (97.43,<br>173.03)     | 8.41 (6.10,<br>10.78)               | 174.83<br>(126.80,<br>224.09) | 174.96<br>(126.88,<br>224.74) |
| <b>Cote d'Ivoire</b>                    | 9.08 (5.68,<br>13.15)         | 40.03<br>(25.06,<br>57.97) | 80.94 (51.84,<br>116.88) | 28.27<br>(19.14,<br>39.04)        | 124.62<br>(84.34,<br>172.07) | 189.00<br>(123.69,<br>267.47) | 37.33<br>(25.50,<br>50.49)          | 164.53<br>(112.41,<br>222.56) | 270.82<br>(185.31,<br>369.24) |
| <b>Croatia</b>                          | 1.65 (1.08,<br>2.34)          | 38.87<br>(25.48,<br>55.06) | 23.65 (15.44,<br>33.25)  | 3.34 (2.40,<br>4.33)              | 78.73<br>(56.70,<br>102.04)  | 45.03 (32.47,<br>58.44)       | 5.00 (3.62,<br>6.45)                | 117.81<br>(85.44,<br>152.10)  | 69.03 (49.85,<br>88.95)       |
| <b>Cuba</b>                             | 3.17 (1.99,<br>4.63)          | 27.81<br>(17.47,<br>40.61) | 20.49 (12.69,<br>30.35)  | 10.25<br>(7.29,<br>13.57)         | 89.95<br>(64.00,<br>119.09)  | 66.97 (47.68,<br>88.27)       | 13.45<br>(9.50,<br>17.70)           | 118.07<br>(83.42,<br>155.38)  | 87.58 (62.19,<br>115.61)      |
| <b>Cyprus</b>                           | 0.21 (0.14,<br>0.31)          | 23.91<br>(15.14,<br>34.44) | 18.20 (11.76,<br>25.83)  | 0.75 (0.54,<br>0.97)              | 83.82<br>(60.07,<br>109.09)  | 60.21 (43.24,<br>78.34)       | 0.96 (0.69,<br>1.25)                | 107.87<br>(77.36,<br>140.64)  | 78.41 (56.11,<br>102.22)      |
| <b>Czech Republic</b>                   | 4.25 (2.78,<br>6.04)          | 39.71<br>(25.97,<br>56.42) | 25.71 (16.53,<br>36.59)  | 5.56 (4.07,<br>7.07)              | 51.94<br>(38.09,<br>66.06)   | 32.97 (23.97,<br>41.68)       | 9.83 (7.04,<br>12.77)               | 91.86<br>(65.78,<br>119.39)   | 58.62 (42.45,<br>76.24)       |
| <b>Democratic Republic of the Congo</b> | 22.52<br>(14.70,<br>32.09)    | 29.09<br>(18.99,<br>41.45) | 65.38 (42.42,<br>93.03)  | 33.70<br>(24.05,<br>44.53)        | 43.53<br>(31.07,<br>57.52)   | 78.20 (56.21,<br>102.14)      | 56.66<br>(40.43,<br>73.73)          | 73.19<br>(52.22,<br>95.24)    | 143.94<br>(103.26,<br>188.29) |
| <b>Denmark</b>                          | 0.77 (0.46,<br>1.20)          | 13.52<br>(8.13,<br>21.05)  | 8.77 (5.30,<br>13.74)    | 1.38 (0.88,<br>2.00)              | 24.11<br>(15.44,<br>35.11)   | 14.49 (9.35,<br>21.05)        | 2.15 (1.39,<br>3.13)                | 37.71<br>(24.36,<br>54.78)    | 23.27 (15.13,<br>33.81)       |
| <b>Djibouti</b>                         | 0.35 (0.22,<br>0.51)          | 39.75<br>(24.97,<br>57.53) | 69.42 (43.27,<br>101.69) | 0.52 (0.33,<br>0.74)              | 58.06<br>(36.69,<br>83.43)   | 89.00 (55.89,<br>128.33)      | 0.87 (0.60,<br>1.19)                | 98.28<br>(67.04,<br>134.22)   | 159.20<br>(108.66,<br>216.60) |

|                                       |                      |                      |                       |                        |                         |                         |                         |                         |                         |
|---------------------------------------|----------------------|----------------------|-----------------------|------------------------|-------------------------|-------------------------|-------------------------|-------------------------|-------------------------|
| <b>Dominica</b>                       | 0.02 (0.01, 0.03)    | 26.78 (16.28, 40.41) | 27.20 (16.63, 41.41)  | 0.10 (0.07, 0.14)      | 141.01 (94.20, 198.43)  | 143.39 (95.78, 200.98)  | 0.12 (0.08, 0.17)       | 167.77 (112.89, 233.81) | 170.57 (114.74, 238.15) |
| <b>Dominican Republic</b>             | 2.16 (1.40, 3.11)    | 20.51 (13.32, 29.56) | 25.21 (16.27, 35.79)  | 10.27 (7.12, 13.78)    | 97.53 (67.59, 130.86)   | 118.26 (82.48, 158.03)  | 12.44 (8.72, 16.50)     | 118.16 (82.83, 156.69)  | 143.44 (101.14, 190.86) |
| <b>Ecuador</b>                        | 2.15 (1.32, 3.26)    | 13.29 (8.20, 20.16)  | 16.47 (10.07, 24.94)  | 16.18 (11.08, 22.31)   | 100.15 (68.60, 138.10)  | 125.41 (85.32, 172.37)  | 18.39 (12.51, 25.26)    | 113.87 (77.43, 156.40)  | 142.20 (96.35, 195.11)  |
| <b>Egypt</b>                          | 52.26 (33.82, 73.90) | 57.34 (37.10, 81.08) | 78.38 (52.19, 109.64) | 120.03 (72.90, 175.32) | 131.68 (79.98, 192.35)  | 195.21 (113.70, 292.81) | 172.30 (117.78, 234.75) | 189.03 (129.21, 257.55) | 273.55 (184.84, 379.35) |
| <b>El Salvador</b>                    | 3.28 (2.17, 4.57)    | 53.49 (35.35, 74.39) | 60.54 (40.91, 83.89)  | 26.18 (18.78, 34.28)   | 426.58 (306.06, 558.61) | 481.81 (344.35, 636.50) | 29.52 (21.20, 38.63)    | 481.04 (345.36, 629.37) | 543.35 (391.16, 707.96) |
| <b>Equatorial Guinea</b>              | 0.31 (0.19, 0.44)    | 36.10 (22.80, 52.06) | 62.82 (40.97, 89.68)  | 0.33 (0.14, 0.55)      | 38.67 (16.27, 65.19)    | 65.43 (28.59, 107.37)   | 0.63 (0.40, 0.91)       | 74.72 (47.43, 107.66)   | 127.91 (82.09, 182.20)  |
| <b>Eritrea</b>                        | 1.58 (0.99, 2.26)    | 30.15 (18.84, 43.18) | 65.72 (41.77, 93.78)  | 2.55 (1.72, 3.51)      | 48.56 (32.81, 67.03)    | 90.41 (61.56, 124.00)   | 4.13 (2.84, 5.58)       | 78.70 (54.27, 106.42)   | 156.58 (109.12, 209.90) |
| <b>Estonia</b>                        | 0.24 (0.13, 0.40)    | 17.52 (9.40, 29.47)  | 10.53 (5.71, 17.73)   | 0.34 (0.20, 0.52)      | 24.98 (14.95, 38.24)    | 15.18 (9.06, 23.36)     | 0.58 (0.34, 0.90)       | 42.69 (25.13, 66.20)    | 25.83 (15.22, 40.11)    |
| <b>Ethiopia</b>                       | 33.19 (20.80, 48.02) | 33.38 (20.92, 48.29) | 67.59 (42.14, 98.96)  | 61.22 (42.68, 81.87)   | 61.57 (42.92, 82.34)    | 109.74 (76.89, 145.84)  | 94.59 (67.19, 125.41)   | 95.13 (67.58, 126.13)   | 177.87 (126.42, 234.11) |
| <b>Federated States of Micronesia</b> | 0.01 (0.00, 0.01)    | 5.15 (0.78, 11.55)   | 8.30 (1.23, 18.33)    | 0.05 (0.01, 0.11)      | 46.55 (6.82, 106.75)    | 71.82 (10.73, 165.71)   | 0.05 (0.01, 0.12)       | 51.60 (7.54, 116.80)    | 80.06 (12.05, 181.25)   |
| <b>Fiji</b>                           | 0.06 (0.01, 0.14)    | 7.08 (0.72, 16.13)   | 8.44 (0.86, 19.52)    | 0.49 (0.05, 1.10)      | 54.64 (5.58, 123.55)    | 65.44 (6.46, 147.66)    | 0.55 (0.06, 1.23)       | 61.67 (6.29, 138.03)    | 74.23 (7.50, 164.95)    |
| <b>Finland</b>                        | 0.31 (0.13, 0.58)    | 5.53 (2.29, 10.37)   | 3.37 (1.42, 6.32)     | 0.34 (0.15, 0.59)      | 6.04 (2.65, 10.58)      | 3.25 (1.44, 5.68)       | 0.64 (0.28, 1.14)       | 11.62 (5.04, 20.51)     | 6.67 (2.90, 11.83)      |
| <b>France</b>                         | 10.91 (6.80, 16.24)  | 16.72 (10.42, 24.90) | 10.33 (6.46, 15.54)   | 14.82 (9.99, 20.53)    | 22.72 (15.32, 31.47)    | 11.56 (7.81, 16.04)     | 25.74 (17.27, 36.09)    | 39.46 (26.48, 55.32)    | 21.98 (14.45, 30.75)    |

|                      |                      |                      |                       |                      |                         |                         |                      |                         |                         |
|----------------------|----------------------|----------------------|-----------------------|----------------------|-------------------------|-------------------------|----------------------|-------------------------|-------------------------|
| <b>Gabon</b>         | 0.69 (0.44, 0.98)    | 39.84 (25.74, 56.59) | 64.43 (41.20, 92.46)  | 1.17 (0.73, 1.69)    | 67.89 (42.35, 97.63)    | 103.47 (65.94, 149.30)  | 1.86 (1.28, 2.56)    | 107.89 (74.10, 148.39)  | 169.15 (115.23, 230.82) |
| <b>Georgia</b>       | 2.79 (1.81, 3.99)    | 69.57 (45.09, 99.58) | 52.95 (34.74, 74.84)  | 5.47 (3.95, 7.07)    | 136.67 (98.53, 176.53)  | 109.34 (78.72, 141.78)  | 8.05 (5.80, 10.42)   | 200.95 (144.82, 260.11) | 162.56 (116.39, 211.01) |
| <b>Germany</b>       | 19.37 (12.08, 28.60) | 23.16 (14.45, 34.20) | 12.69 (7.91, 18.77)   | 48.60 (33.67, 65.68) | 58.12 (40.26, 78.54)    | 26.78 (18.63, 36.11)    | 68.11 (47.23, 92.79) | 81.44 (56.48, 110.96)   | 39.52 (27.20, 53.71)    |
| <b>Ghana</b>         | 12.42 (7.83, 17.85)  | 45.30 (28.55, 65.10) | 82.09 (52.28, 118.31) | 26.03 (18.42, 34.67) | 94.94 (67.17, 126.47)   | 138.80 (98.95, 184.52)  | 38.46 (27.42, 50.42) | 140.27 (100.00, 183.89) | 221.70 (158.31, 291.92) |
| <b>Greece</b>        | 2.82 (1.77, 4.15)    | 25.80 (16.19, 37.97) | 14.22 (8.94, 21.00)   | 6.41 (4.38, 8.70)    | 58.68 (40.11, 79.65)    | 28.23 (19.35, 38.55)    | 9.20 (6.34, 12.62)   | 84.26 (58.03, 115.54)   | 42.42 (29.20, 58.30)    |
| <b>Greenland</b>     | 0.00 (0.00, 0.00)    | 1.91 (0.00, 5.81)    | 2.03 (0.00, 6.25)     | 0.00 (0.00, 0.01)    | 3.06 (0.00, 9.34)       | 4.06 (0.00, 12.10)      | 0.00 (0.00, 0.01)    | 5.05 (0.00, 14.85)      | 6.15 (0.00, 17.97)      |
| <b>Grenada</b>       | 0.02 (0.02, 0.04)    | 23.18 (14.68, 34.33) | 26.83 (16.93, 39.22)  | 0.17 (0.12, 0.24)    | 160.25 (109.88, 220.44) | 185.70 (127.42, 254.62) | 0.20 (0.13, 0.27)    | 183.38 (126.10, 251.11) | 212.35 (146.51, 290.28) |
| <b>Guam</b>          | 0.01 (0.01, 0.03)    | 8.49 (3.03, 16.96)   | 8.90 (3.15, 17.49)    | 0.07 (0.02, 0.13)    | 40.18 (14.62, 75.40)    | 41.50 (15.03, 77.79)    | 0.08 (0.03, 0.15)    | 48.82 (18.00, 91.23)    | 50.69 (18.52, 93.78)    |
| <b>Guatemala</b>     | 6.58 (4.31, 9.27)    | 40.24 (26.36, 56.66) | 65.22 (42.57, 91.99)  | 36.15 (24.35, 49.98) | 221.02 (148.91, 305.60) | 341.33 (229.36, 470.47) | 42.67 (29.49, 58.10) | 260.90 (180.34, 355.27) | 408.41 (283.82, 551.84) |
| <b>Guinea</b>        | 4.63 (2.95, 6.69)    | 36.83 (23.43, 53.19) | 73.16 (46.42, 106.87) | 10.60 (7.03, 14.77)  | 84.34 (55.88, 117.44)   | 125.93 (84.04, 177.29)  | 15.23 (10.57, 20.72) | 121.16 (84.06, 164.80)  | 200.40 (138.47, 270.56) |
| <b>Guinea-Bissau</b> | 0.95 (0.60, 1.37)    | 51.12 (32.31, 73.94) | 97.52 (61.55, 140.52) | 3.07 (2.11, 4.18)    | 166.22 (114.18, 226.05) | 250.33 (172.32, 341.15) | 4.02 (2.82, 5.40)    | 217.69 (152.81, 291.96) | 349.02 (246.22, 463.93) |
| <b>Guyana</b>        | 0.16 (0.10, 0.23)    | 20.60 (12.92, 30.36) | 27.16 (17.08, 40.05)  | 1.07 (0.74, 1.45)    | 138.67 (96.10, 188.24)  | 166.74 (115.79, 224.82) | 1.23 (0.85, 1.66)    | 159.32 (110.51, 215.69) | 193.49 (134.96, 260.32) |
| <b>Haiti</b>         | 3.11 (1.99, 4.46)    | 28.98 (18.58, 41.56) | 46.35 (30.15, 65.93)  | 21.89 (13.72, 31.56) | 204.22 (127.98, 294.35) | 288.82 (178.97, 421.19) | 24.97 (16.35, 35.18) | 232.93 (152.48, 328.10) | 336.51 (221.79, 469.96) |

|                  |                         |                      |                        |                               |                         |                         |                               |                         |                         |
|------------------|-------------------------|----------------------|------------------------|-------------------------------|-------------------------|-------------------------|-------------------------------|-------------------------|-------------------------|
| <b>Honduras</b>  | 2.91 (1.87, 4.16)       | 35.95 (23.14, 51.41) | 56.82 (36.73, 80.36)   | 18.89 (11.77, 27.36)          | 233.27 (145.37, 337.87) | 373.02 (236.17, 536.20) | 21.84 (14.16, 30.66)          | 269.69 (174.88, 378.64) | 429.86 (279.86, 607.50) |
| <b>Hungary</b>   | 4.43 (2.93, 6.25)       | 43.61 (28.86, 61.47) | 27.78 (18.37, 39.22)   | 7.31 (5.32, 9.32)             | 71.89 (52.35, 91.69)    | 45.39 (33.18, 57.91)    | 11.77 (8.60, 15.16)           | 115.74 (84.56, 149.08)  | 73.26 (53.08, 94.52)    |
| <b>Iceland</b>   | 0.01 (0.01, 0.03)       | 4.32 (1.96, 7.91)    | 3.32 (1.51, 6.12)      | 0.02 (0.01, 0.04)             | 6.61 (3.15, 11.26)      | 4.67 (2.24, 7.93)       | 0.04 (0.02, 0.06)             | 10.97 (5.24, 18.70)     | 8.05 (3.82, 13.68)      |
| <b>India</b>     | 447.47 (289.00, 638.28) | 34.12 (22.03, 48.66) | 45.40 (29.19, 64.54)   | 2,048.91 (1,471.02, 2,662.61) | 156.21 (112.15, 203.00) | 192.55 (138.73, 249.04) | 2,502.15 (1,827.96, 3,204.77) | 190.77 (139.37, 244.33) | 238.25 (173.90, 303.98) |
| <b>Indonesia</b> | 40.67 (25.55, 60.13)    | 15.79 (9.92, 23.34)  | 20.02 (12.80, 29.32)   | 224.57 (158.94, 297.66)       | 87.17 (61.70, 115.54)   | 102.00 (72.07, 134.72)  | 265.23 (186.14, 351.41)       | 102.95 (72.25, 136.41)  | 122.19 (86.18, 162.36)  |
| <b>Iran</b>      | 40.01 (25.81, 56.48)    | 50.63 (32.66, 71.46) | 62.59 (40.71, 87.54)   | 63.94 (43.65, 87.16)          | 80.90 (55.23, 110.28)   | 113.67 (76.61, 156.53)  | 104.22 (74.20, 137.48)        | 131.87 (93.88, 173.95)  | 176.65 (125.09, 232.59) |
| <b>Iraq</b>      | 19.19 (12.49, 27.20)    | 52.68 (34.30, 74.68) | 101.57 (65.61, 143.07) | 55.87 (36.12, 78.88)          | 153.40 (99.19, 216.58)  | 318.22 (206.59, 449.32) | 75.32 (50.89, 102.71)         | 206.79 (139.73, 282.01) | 419.84 (287.98, 568.47) |
| <b>Ireland</b>   | 0.37 (0.21, 0.61)       | 7.79 (4.40, 12.69)   | 6.15 (3.49, 9.94)      | 0.75 (0.46, 1.15)             | 15.76 (9.63, 23.98)     | 12.00 (7.32, 18.19)     | 1.13 (0.70, 1.71)             | 23.65 (14.54, 35.63)    | 18.27 (11.28, 27.51)    |
| <b>Israel</b>    | 3.02 (2.00, 4.21)       | 37.57 (24.79, 52.28) | 34.58 (23.29, 48.51)   | 8.19 (5.64, 11.06)            | 101.74 (70.06, 137.39)  | 89.16 (61.66, 120.39)   | 11.22 (8.06, 14.81)           | 139.36 (100.15, 184.04) | 124.05 (88.27, 162.83)  |
| <b>Italy</b>     | 21.45 (13.88, 30.20)    | 34.16 (22.11, 48.10) | 18.21 (11.64, 25.94)   | 42.15 (30.49, 53.95)          | 67.12 (48.55, 85.91)    | 30.11 (21.70, 38.73)    | 63.56 (45.86, 82.14)          | 101.22 (73.03, 130.80)  | 48.45 (34.67, 63.06)    |
| <b>Jamaica</b>   | 0.85 (0.55, 1.24)       | 30.16 (19.31, 43.66) | 31.36 (20.01, 45.53)   | 4.10 (2.52, 5.95)             | 145.06 (88.93, 210.37)  | 150.41 (95.03, 220.47)  | 4.93 (3.20, 7.06)             | 174.26 (113.09, 249.40) | 182.02 (119.19, 259.29) |
| <b>Japan</b>     | 57.64 (36.80, 84.54)    | 44.92 (28.68, 65.89) | 21.97 (13.83, 32.50)   | 72.08 (49.89, 97.36)          | 56.18 (38.88, 75.88)    | 23.15 (16.00, 31.22)    | 129.79 (88.75, 178.70)        | 101.16 (69.17, 139.27)  | 45.26 (30.63, 62.55)    |
| <b>Jordan</b>    | 3.38 (2.20, 4.78)       | 44.69 (29.00, 63.16) | 73.69 (48.26, 104.12)  | 8.94 (5.84, 12.69)            | 118.07 (77.08, 167.59)  | 220.75 (145.55, 309.46) | 12.38 (8.47, 16.92)           | 163.52 (111.86, 223.54) | 295.39 (203.17, 401.39) |

|                   |                    |                      |                       |                     |                         |                         |                      |                         |                         |
|-------------------|--------------------|----------------------|-----------------------|---------------------|-------------------------|-------------------------|----------------------|-------------------------|-------------------------|
| <b>Kazakhstan</b> | 6.56 (4.09, 9.54)  | 37.39 (23.33, 54.40) | 44.28 (27.96, 64.54)  | 10.80 (7.42, 14.68) | 61.60 (42.29, 83.70)    | 67.01 (45.73, 91.21)    | 17.40 (12.14, 23.45) | 99.23 (69.24, 133.73)   | 111.27 (77.35, 149.82)  |
| <b>Kenya</b>      | 7.21 (4.44, 10.72) | 15.62 (9.60, 23.20)  | 32.62 (19.87, 48.33)  | 9.03 (6.02, 12.76)  | 19.55 (13.04, 27.62)    | 35.26 (23.26, 49.71)    | 16.31 (11.14, 22.40) | 35.32 (24.13, 48.50)    | 67.96 (46.37, 94.51)    |
| <b>Kiribati</b>   | 0.00 (0.00, 0.00)  | 0.00 (0.00, 2.78)    | 0.00 (0.00, 4.34)     | 0.00 (0.00, 0.02)   | 0.00 (0.00, 14.97)      | 0.00 (0.00, 22.50)      | 0.00 (0.00, 0.02)    | 0.00 (0.00, 17.59)      | 0.00 (0.00, 26.59)      |
| <b>Kuwait</b>     | 1.67 (1.07, 2.36)  | 42.72 (27.46, 60.56) | 62.14 (41.51, 87.34)  | 1.46 (0.94, 2.04)   | 37.47 (24.17, 52.38)    | 96.18 (63.34, 135.21)   | 3.13 (2.18, 4.19)    | 80.12 (56.00, 107.52)   | 158.85 (110.11, 212.88) |
| <b>Kyrgyzstan</b> | 1.60 (0.99, 2.32)  | 27.19 (16.87, 39.37) | 39.54 (25.16, 57.71)  | 3.97 (2.80, 5.24)   | 67.28 (47.48, 88.89)    | 77.55 (54.77, 102.49)   | 5.58 (3.92, 7.39)    | 94.65 (66.52, 125.35)   | 117.48 (82.40, 157.14)  |
| <b>Laos</b>       | 1.40 (0.92, 1.96)  | 20.54 (13.47, 28.90) | 35.90 (23.64, 50.12)  | 10.56 (7.48, 13.97) | 155.35 (109.96, 205.51) | 225.76 (160.53, 295.45) | 11.98 (8.56, 15.65)  | 176.24 (125.92, 230.19) | 261.99 (187.73, 338.96) |
| <b>Latvia</b>     | 1.15 (0.72, 1.66)  | 51.94 (32.47, 75.02) | 31.18 (19.79, 44.95)  | 1.23 (0.88, 1.59)   | 55.51 (39.91, 71.89)    | 35.81 (25.58, 46.79)    | 2.38 (1.68, 3.14)    | 107.46 (75.80, 141.87)  | 66.97 (47.80, 88.16)    |
| <b>Lebanon</b>    | 2.84 (1.86, 4.04)  | 49.32 (32.23, 70.05) | 52.61 (33.79, 73.67)  | 3.16 (2.20, 4.23)   | 54.82 (38.26, 73.35)    | 60.14 (42.42, 81.00)    | 6.03 (4.33, 7.85)    | 104.63 (75.20, 136.31)  | 113.49 (80.31, 149.05)  |
| <b>Lesotho</b>    | 0.89 (0.57, 1.28)  | 41.72 (26.56, 60.28) | 73.49 (46.75, 106.00) | 2.27 (1.40, 3.30)   | 106.69 (65.92, 154.98)  | 191.47 (120.26, 275.94) | 3.17 (2.11, 4.41)    | 148.80 (99.07, 207.33)  | 265.75 (177.38, 369.94) |
| <b>Liberia</b>    | 0.37 (0.16, 0.69)  | 8.13 (3.55, 15.26)   | 16.17 (7.14, 30.27)   | 1.02 (0.46, 1.85)   | 22.67 (10.20, 41.02)    | 37.89 (17.07, 68.49)    | 1.40 (0.63, 2.46)    | 31.11 (14.03, 54.65)    | 54.40 (24.99, 95.66)    |
| <b>Libya</b>      | 3.10 (1.99, 4.41)  | 49.22 (31.58, 70.12) | 64.63 (41.62, 91.46)  | 9.93 (6.69, 13.58)  | 157.79 (106.21, 215.77) | 239.23 (164.52, 324.97) | 12.98 (9.12, 17.43)  | 206.27 (144.95, 276.96) | 304.55 (214.36, 405.38) |
| <b>Lithuania</b>  | 1.40 (0.87, 2.03)  | 44.29 (27.62, 64.53) | 26.66 (16.65, 38.80)  | 1.23 (0.89, 1.59)   | 38.87 (28.18, 50.34)    | 25.74 (18.60, 33.17)    | 2.63 (1.83, 3.53)    | 83.36 (57.97, 112.11)   | 52.62 (36.84, 69.86)    |
| <b>Luxembourg</b> | 0.11 (0.07, 0.16)  | 20.08 (13.06, 28.98) | 14.63 (9.45, 21.29)   | 0.20 (0.14, 0.27)   | 35.99 (25.41, 48.02)    | 24.27 (17.12, 32.21)    | 0.31 (0.22, 0.42)    | 56.31 (39.71, 74.94)    | 38.94 (27.24, 52.34)    |



|                         |                       |                      |                       |                         |                         |                         |                         |                         |                         |
|-------------------------|-----------------------|----------------------|-----------------------|-------------------------|-------------------------|-------------------------|-------------------------|-------------------------|-------------------------|
| <b>Macedonia</b>        | 0.90 (0.59, 1.27)     | 43.25 (28.18, 61.19) | 34.63 (22.59, 48.79)  | 2.21 (1.61, 2.83)       | 106.56 (77.58, 136.06)  | 84.44 (61.71, 107.85)   | 3.12 (2.28, 3.98)       | 150.29 (109.65, 191.33) | 119.39 (86.76, 152.31)  |
| <b>Madagascar</b>       | 5.26 (3.22, 7.69)     | 21.73 (13.31, 31.80) | 45.18 (28.06, 66.20)  | 9.04 (5.99, 12.78)      | 37.37 (24.77, 52.83)    | 61.22 (40.58, 85.75)    | 14.36 (9.80, 19.61)     | 59.35 (40.52, 81.07)    | 107.07 (74.22, 146.41)  |
| <b>Malawi</b>           | 4.24 (2.62, 6.18)     | 24.65 (15.22, 35.88) | 56.22 (35.02, 82.60)  | 8.68 (5.88, 11.99)      | 50.42 (34.18, 69.66)    | 89.53 (60.33, 124.01)   | 12.99 (9.07, 17.38)     | 75.45 (52.71, 100.96)   | 146.34 (103.79, 194.95) |
| <b>Malaysia</b>         | 4.83 (2.98, 7.15)     | 15.95 (9.83, 23.60)  | 19.95 (12.31, 29.58)  | 17.65 (12.24, 23.82)    | 58.25 (40.41, 78.62)    | 75.22 (52.62, 100.56)   | 22.52 (15.61, 30.24)    | 74.33 (51.53, 99.81)    | 95.26 (66.73, 127.57)   |
| <b>Maldives</b>         | 0.08 (0.05, 0.12)     | 22.29 (14.33, 31.90) | 31.65 (20.35, 44.89)  | 0.49 (0.33, 0.67)       | 134.44 (90.97, 184.83)  | 206.14 (139.42, 282.81) | 0.57 (0.39, 0.77)       | 156.71 (107.58, 212.79) | 237.75 (164.88, 321.79) |
| <b>Mali</b>             | 6.34 (3.98, 9.08)     | 36.09 (22.66, 51.68) | 84.40 (54.25, 121.34) | 16.34 (10.69, 22.99)    | 93.03 (60.87, 130.87)   | 140.33 (92.29, 195.80)  | 22.81 (15.96, 30.76)    | 129.83 (90.82, 175.11)  | 225.22 (157.45, 301.52) |
| <b>Malta</b>            | 0.10 (0.06, 0.15)     | 24.57 (15.50, 35.79) | 15.83 (10.05, 23.22)  | 0.23 (0.16, 0.32)       | 56.10 (37.89, 77.44)    | 33.99 (23.02, 47.21)    | 0.34 (0.23, 0.46)       | 80.76 (55.48, 109.36)   | 49.99 (34.54, 68.39)    |
| <b>Marshall Islands</b> | 0.01 (0.01, 0.02)     | 16.60 (9.08, 27.35)  | 27.62 (15.35, 45.56)  | 0.08 (0.04, 0.14)       | 107.66 (53.64, 189.61)  | 171.05 (85.99, 298.82)  | 0.09 (0.05, 0.15)       | 124.80 (65.47, 213.03)  | 199.34 (104.19, 344.92) |
| <b>Mauritania</b>       | 1.84 (1.14, 2.66)     | 44.98 (27.94, 65.03) | 81.72 (51.93, 116.30) | 3.45 (2.23, 4.89)       | 84.49 (54.54, 119.68)   | 133.29 (87.40, 189.66)  | 5.32 (3.67, 7.21)       | 130.13 (89.96, 176.52)  | 216.06 (149.79, 291.21) |
| <b>Mauritius</b>        | 0.53 (0.33, 0.77)     | 41.27 (26.17, 60.30) | 37.45 (23.50, 54.65)  | 4.03 (2.77, 5.54)       | 316.19 (217.45, 434.77) | 278.43 (190.83, 382.07) | 4.57 (3.14, 6.26)       | 358.69 (246.54, 491.69) | 315.62 (217.48, 432.92) |
| <b>Mexico</b>           | 74.93 (49.49, 104.85) | 58.98 (38.95, 82.54) | 72.27 (48.02, 101.20) | 390.95 (286.18, 495.17) | 307.73 (225.26, 389.77) | 382.48 (279.40, 484.08) | 466.91 (339.46, 591.64) | 367.53 (267.20, 465.70) | 455.29 (332.51, 577.97) |
| <b>Moldova</b>          | 1.10 (0.69, 1.65)     | 27.07 (16.89, 40.47) | 23.99 (14.92, 35.33)  | 1.24 (0.87, 1.65)       | 30.56 (21.50, 40.70)    | 25.99 (18.17, 34.39)    | 2.35 (1.63, 3.18)       | 57.86 (40.20, 78.24)    | 49.92 (34.26, 68.11)    |
| <b>Mongolia</b>         | 1.44 (0.91, 2.07)     | 48.65 (30.89, 70.07) | 71.95 (45.44, 104.52) | 3.92 (1.84, 6.39)       | 132.82 (62.15, 216.42)  | 159.95 (82.07, 251.45)  | 5.36 (3.07, 8.10)       | 181.34 (104.12, 274.36) | 232.09 (144.46, 338.98) |



|                                 |                      |                      |                       |                       |                         |                         |                        |                         |                         |
|---------------------------------|----------------------|----------------------|-----------------------|-----------------------|-------------------------|-------------------------|------------------------|-------------------------|-------------------------|
| <b>Montenegro</b>               | 0.24 (0.15, 0.35)    | 37.99 (23.22, 55.93) | 29.04 (18.03, 41.99)  | 0.70 (0.50, 0.90)     | 111.08 (79.94, 144.42)  | 85.11 (61.70, 110.56)   | 0.94 (0.68, 1.21)      | 149.44 (108.02, 193.16) | 114.41 (83.11, 147.56)  |
| <b>Morocco</b>                  | 15.85 (10.18, 22.71) | 46.12 (29.62, 66.05) | 53.43 (34.34, 77.10)  | 59.22 (39.29, 82.64)  | 172.28 (114.30, 240.41) | 210.24 (136.95, 298.98) | 75.30 (52.04, 101.51)  | 219.08 (151.40, 295.32) | 264.23 (181.58, 360.76) |
| <b>Mozambique</b>               | 6.48 (4.07, 9.58)    | 23.17 (14.54, 34.21) | 49.55 (31.12, 72.18)  | 11.62 (6.16, 18.36)   | 41.52 (22.01, 65.59)    | 68.33 (36.08, 108.85)   | 18.11 (11.57, 26.09)   | 64.70 (41.34, 93.20)    | 117.80 (75.41, 170.55)  |
| <b>Myanmar</b>                  | 14.41 (9.15, 20.69)  | 26.68 (16.94, 38.30) | 34.36 (21.95, 48.94)  | 85.73 (60.05, 113.35) | 158.68 (111.14, 209.81) | 193.98 (139.31, 254.94) | 100.03 (71.37, 131.87) | 185.15 (132.09, 244.09) | 228.69 (163.33, 299.93) |
| <b>Namibia</b>                  | 0.75 (0.47, 1.07)    | 30.49 (19.14, 43.78) | 54.33 (34.63, 79.02)  | 1.43 (0.87, 2.14)     | 58.35 (35.30, 87.20)    | 107.16 (65.06, 160.65)  | 2.19 (1.43, 3.08)      | 89.26 (58.27, 125.54)   | 161.94 (106.15, 227.78) |
| <b>Nepal</b>                    | 10.76 (6.99, 15.23)  | 37.67 (24.48, 53.34) | 56.55 (35.89, 80.92)  | 36.26 (24.22, 50.10)  | 127.02 (84.83, 175.47)  | 181.39 (122.63, 251.34) | 47.16 (32.78, 63.76)   | 165.17 (114.82, 223.31) | 238.33 (166.71, 319.47) |
| <b>Netherlands</b>              | 3.09 (1.97, 4.49)    | 17.96 (11.48, 26.15) | 11.61 (7.37, 17.08)   | 5.32 (3.71, 7.17)     | 30.93 (21.57, 41.71)    | 17.93 (12.50, 24.14)    | 8.40 (5.85, 11.41)     | 48.89 (34.02, 66.40)    | 29.64 (20.46, 40.00)    |
| <b>New Zealand</b>              | 0.10 (0.00, 0.29)    | 2.30 (0.00, 6.35)    | 1.71 (0.00, 4.68)     | 0.27 (0.00, 0.71)     | 5.99 (0.00, 15.48)      | 4.23 (0.00, 11.06)      | 0.38 (0.00, 0.99)      | 8.28 (0.00, 21.61)      | 5.98 (0.00, 15.66)      |
| <b>Nicaragua</b>                | 2.46 (1.61, 3.45)    | 40.37 (26.47, 56.66) | 55.95 (36.53, 79.46)  | 19.41 (13.63, 25.94)  | 318.74 (223.87, 426.02) | 430.73 (300.43, 574.81) | 21.91 (15.44, 29.17)   | 359.93 (253.60, 479.10) | 486.52 (343.82, 646.79) |
| <b>Niger</b>                    | 7.23 (4.59, 10.31)   | 36.44 (23.13, 51.95) | 83.74 (53.34, 119.47) | 19.14 (11.85, 28.03)  | 96.42 (59.70, 141.17)   | 146.12 (93.15, 208.11)  | 26.36 (17.79, 36.22)   | 132.75 (89.59, 182.42)  | 231.08 (156.91, 313.98) |
| <b>Nigeria</b>                  | 61.22 (38.09, 88.68) | 33.55 (20.87, 48.59) | 71.93 (45.61, 103.27) | 57.66 (37.92, 80.13)  | 31.60 (20.78, 43.91)    | 44.94 (29.23, 62.98)    | 119.40 (82.97, 161.55) | 65.43 (45.47, 88.52)    | 117.66 (81.05, 158.12)  |
| <b>North Korea</b>              | 9.89 (6.46, 13.94)   | 39.31 (25.66, 55.40) | 40.32 (26.41, 57.00)  | 28.73 (20.52, 37.48)  | 114.19 (81.57, 148.96)  | 113.40 (81.07, 148.41)  | 38.69 (27.97, 50.53)   | 153.79 (111.16, 200.83) | 153.80 (111.17, 199.42) |
| <b>Northern Mariana Islands</b> | 0.02 (0.01, 0.02)    | 13.73 (8.23, 21.38)  | 25.74 (15.51, 39.61)  | 0.07 (0.04, 0.10)     | 56.73 (35.54, 85.53)    | 126.69 (80.14, 186.00)  | 0.08 (0.05, 0.12)      | 70.80 (45.02, 105.00)   | 152.32 (98.83, 222.85)  |

|                         |                      |                      |                       |                         |                         |                         |                         |                         |                         |
|-------------------------|----------------------|----------------------|-----------------------|-------------------------|-------------------------|-------------------------|-------------------------|-------------------------|-------------------------|
| <b>Norway</b>           | 0.35 (0.19, 0.57)    | 6.69 (3.67, 11.04)   | 4.62 (2.56, 7.55)     | 0.59 (0.34, 0.91)       | 11.41 (6.67, 17.61)     | 7.13 (4.16, 11.03)      | 0.94 (0.55, 1.46)       | 18.15 (10.61, 28.26)    | 11.76 (6.86, 18.27)     |
| <b>Oman</b>             | 2.04 (1.31, 2.90)    | 45.54 (29.20, 64.74) | 71.02 (46.68, 99.09)  | 2.27 (1.65, 2.91)       | 50.70 (36.73, 64.92)    | 113.44 (82.14, 146.06)  | 4.32 (3.09, 5.62)       | 96.49 (68.90, 125.40)   | 184.57 (133.94, 239.56) |
| <b>Pakistan</b>         | 47.74 (30.60, 68.12) | 25.25 (16.19, 36.03) | 39.99 (25.77, 56.99)  | 292.68 (174.43, 434.38) | 154.81 (92.27, 229.76)  | 215.59 (123.95, 322.52) | 342.45 (213.87, 492.17) | 181.14 (113.12, 260.33) | 254.25 (157.33, 365.23) |
| <b>Palestine</b>        | 1.84 (1.16, 2.65)    | 39.37 (24.73, 56.67) | 77.71 (50.22, 110.75) | 6.37 (4.64, 8.22)       | 136.36 (99.30, 175.88)  | 312.70 (225.51, 403.20) | 8.22 (5.97, 10.57)      | 175.83 (127.80, 226.11) | 391.28 (283.36, 502.90) |
| <b>Panama</b>           | 0.84 (0.52, 1.26)    | 21.27 (13.18, 32.00) | 24.12 (14.67, 36.23)  | 3.17 (2.10, 4.53)       | 80.74 (53.51, 115.26)   | 90.28 (59.97, 128.36)   | 4.02 (2.69, 5.61)       | 102.22 (68.42, 142.71)  | 114.94 (77.67, 159.65)  |
| <b>Papua New Guinea</b> | 1.02 (0.58, 1.64)    | 13.36 (7.66, 21.46)  | 23.89 (14.06, 37.88)  | 7.50 (3.99, 12.60)      | 98.32 (52.22, 165.03)   | 164.66 (87.62, 270.05)  | 8.59 (4.78, 13.94)      | 112.56 (62.64, 182.66)  | 188.56 (106.76, 304.33) |
| <b>Paraguay</b>         | 1.07 (0.67, 1.58)    | 16.15 (10.09, 23.78) | 22.06 (13.58, 33.09)  | 7.25 (4.98, 9.86)       | 108.93 (74.87, 148.24)  | 149.05 (102.59, 203.04) | 8.33 (5.69, 11.26)      | 125.17 (85.58, 169.27)  | 171.06 (118.47, 232.34) |
| <b>Peru</b>             | 6.45 (4.15, 9.18)    | 20.56 (13.22, 29.25) | 25.73 (16.56, 36.66)  | 34.03 (23.23, 46.67)    | 108.39 (74.00, 148.65)  | 133.73 (90.56, 180.87)  | 40.38 (28.21, 53.89)    | 128.62 (89.86, 171.68)  | 160.05 (112.59, 214.73) |
| <b>Philippines</b>      | 28.85 (18.52, 41.30) | 28.62 (18.37, 40.97) | 40.41 (25.99, 57.40)  | 259.30 (185.16, 337.40) | 257.24 (183.69, 334.71) | 354.39 (255.63, 460.41) | 287.75 (207.53, 372.02) | 285.46 (205.87, 369.05) | 394.64 (287.96, 511.26) |
| <b>Poland</b>           | 16.59 (10.98, 23.41) | 42.64 (28.22, 60.15) | 29.10 (18.79, 41.18)  | 24.23 (17.69, 31.13)    | 62.27 (45.45, 80.01)    | 41.86 (30.51, 53.59)    | 40.89 (29.87, 52.59)    | 105.08 (76.76, 135.15)  | 71.27 (51.55, 91.90)    |
| <b>Portugal</b>         | 1.71 (0.99, 2.72)    | 15.81 (9.20, 25.23)  | 8.93 (5.16, 14.25)    | 3.81 (2.34, 5.70)       | 35.29 (21.68, 52.81)    | 17.91 (11.04, 26.83)    | 5.54 (3.39, 8.34)       | 51.31 (31.41, 77.26)    | 26.99 (16.50, 40.67)    |
| <b>Puerto Rico</b>      | 1.51 (0.97, 2.15)    | 40.87 (26.40, 58.46) | 30.98 (20.18, 44.62)  | 5.52 (3.91, 7.28)       | 149.97 (106.23, 197.55) | 113.91 (81.06, 151.00)  | 7.03 (4.97, 9.27)       | 190.95 (135.04, 251.55) | 145.37 (102.98, 191.07) |
| <b>Qatar</b>            | 0.89 (0.57, 1.27)    | 39.90 (25.64, 57.14) | 60.35 (40.19, 84.52)  | 0.84 (0.51, 1.23)       | 37.93 (23.17, 55.38)    | 118.50 (73.98, 173.45)  | 1.73 (1.18, 2.38)       | 77.95 (52.91, 107.28)   | 180.00 (118.76, 250.16) |

|                                         |                      |                      |                       |                      |                         |                         |                        |                         |                         |
|-----------------------------------------|----------------------|----------------------|-----------------------|----------------------|-------------------------|-------------------------|------------------------|-------------------------|-------------------------|
| <b>Romania</b>                          | 6.85 (4.56, 9.70)    | 35.10 (23.33, 49.66) | 22.37 (14.74, 31.48)  | 14.11 (10.21, 18.23) | 72.25 (52.29, 93.34)    | 47.26 (33.91, 61.01)    | 21.02 (15.03, 27.30)   | 107.63 (77.00, 139.82)  | 69.60 (50.30, 90.70)    |
| <b>Russia</b>                           | 45.31 (27.94, 67.45) | 30.59 (18.86, 45.54) | 22.99 (14.08, 34.08)  | 54.05 (32.23, 81.33) | 36.49 (21.76, 54.91)    | 28.25 (16.88, 42.28)    | 100.14 (66.26, 140.14) | 67.61 (44.74, 94.61)    | 51.29 (34.08, 72.60)    |
| <b>Rwanda</b>                           | 3.02 (1.87, 4.36)    | 25.97 (16.05, 37.47) | 54.12 (33.17, 79.17)  | 4.28 (2.55, 6.38)    | 36.79 (21.93, 54.89)    | 66.56 (38.82, 99.41)    | 7.33 (4.95, 10.18)     | 63.00 (42.53, 87.49)    | 121.20 (82.06, 167.28)  |
| <b>Saint Lucia</b>                      | 0.04 (0.03, 0.07)    | 23.08 (13.90, 35.17) | 22.71 (13.76, 34.28)  | 0.20 (0.13, 0.27)    | 106.13 (72.88, 144.74)  | 103.81 (71.55, 141.19)  | 0.24 (0.17, 0.33)      | 129.38 (89.20, 176.24)  | 126.62 (87.55, 173.16)  |
| <b>Saint Vincent and the Grenadines</b> | 0.02 (0.02, 0.04)    | 22.50 (13.87, 33.75) | 24.70 (15.16, 37.46)  | 0.13 (0.09, 0.18)    | 121.90 (84.02, 166.76)  | 130.26 (90.01, 177.81)  | 0.16 (0.11, 0.22)      | 144.55 (99.57, 196.30)  | 155.22 (106.97, 212.14) |
| <b>Samoa</b>                            | 0.00 (0.00, 0.01)    | 0.00 (0.00, 3.84)    | 0.00 (0.00, 5.70)     | 0.00 (0.00, 0.04)    | 0.00 (0.00, 21.72)      | 0.00 (0.00, 32.36)      | 0.00 (0.00, 0.05)      | 0.00 (0.00, 25.64)      | 0.00 (0.00, 38.51)      |
| <b>Sao Tome and Principe</b>            | 0.05 (0.03, 0.07)    | 25.35 (15.10, 38.77) | 48.74 (29.60, 73.96)  | 0.17 (0.11, 0.26)    | 91.25 (57.95, 133.66)   | 153.48 (99.48, 221.91)  | 0.22 (0.14, 0.32)      | 116.63 (75.83, 168.74)  | 201.80 (134.38, 288.06) |
| <b>Saudi Arabia</b>                     | 13.27 (8.63, 18.98)  | 42.23 (27.44, 60.38) | 62.93 (41.40, 88.25)  | 34.01 (24.58, 43.86) | 108.19 (78.18, 139.51)  | 227.28 (166.46, 290.61) | 47.31 (34.52, 61.01)   | 150.50 (109.80, 194.09) | 291.08 (211.88, 372.82) |
| <b>Senegal</b>                          | 6.52 (4.13, 9.37)    | 43.18 (27.36, 62.00) | 89.98 (57.24, 129.26) | 17.32 (12.26, 22.75) | 114.64 (81.16, 150.60)  | 189.77 (136.70, 246.60) | 23.92 (17.22, 31.12)   | 158.33 (113.97, 205.94) | 280.40 (202.56, 362.00) |
| <b>Serbia</b>                           | 3.62 (2.36, 5.13)    | 40.87 (26.60, 57.97) | 26.73 (17.55, 38.13)  | 10.32 (7.49, 13.20)  | 116.57 (84.53, 149.08)  | 75.89 (55.14, 97.25)    | 13.91 (10.13, 17.91)   | 157.10 (114.42, 202.25) | 102.82 (74.80, 132.19)  |
| <b>Seychelles</b>                       | 0.02 (0.01, 0.02)    | 16.72 (9.88, 25.59)  | 17.41 (10.55, 26.44)  | 0.15 (0.10, 0.22)    | 157.96 (104.85, 223.41) | 165.03 (110.66, 233.29) | 0.17 (0.11, 0.24)      | 175.10 (117.35, 245.78) | 182.95 (123.36, 256.84) |
| <b>Sierra Leone</b>                     | 1.76 (1.09, 2.61)    | 27.31 (16.90, 40.32) | 57.89 (35.55, 86.10)  | 5.04 (3.25, 7.28)    | 77.97 (50.36, 112.65)   | 115.11 (76.06, 165.01)  | 6.81 (4.62, 9.62)      | 105.39 (71.44, 148.83)  | 173.17 (116.39, 240.75) |
| <b>Singapore</b>                        | 1.56 (1.03, 2.22)    | 39.79 (26.21, 56.48) | 31.23 (20.24, 43.99)  | 2.85 (1.93, 3.94)    | 72.51 (49.28, 100.30)   | 59.44 (40.45, 82.38)    | 4.42 (3.07, 5.94)      | 112.75 (78.29, 151.41)  | 91.04 (63.80, 122.34)   |

|                        |                      |                      |                       |                       |                         |                         |                        |                         |                         |
|------------------------|----------------------|----------------------|-----------------------|-----------------------|-------------------------|-------------------------|------------------------|-------------------------|-------------------------|
| <b>Slovakia</b>        | 2.05 (1.30, 2.92)    | 36.82 (23.46, 52.56) | 26.93 (17.23, 38.62)  | 3.67 (2.63, 4.82)     | 66.15 (47.33, 86.81)    | 48.08 (34.41, 63.01)    | 5.74 (4.13, 7.48)      | 103.39 (74.37, 134.71)  | 75.35 (53.37, 98.22)    |
| <b>Slovenia</b>        | 0.76 (0.49, 1.09)    | 36.97 (23.84, 52.95) | 22.44 (14.62, 31.75)  | 0.74 (0.53, 0.96)     | 35.71 (25.55, 46.58)    | 19.26 (13.81, 25.17)    | 1.50 (1.07, 1.98)      | 72.72 (51.62, 95.92)    | 41.95 (29.69, 55.35)    |
| <b>Solomon Islands</b> | 0.02 (0.00, 0.05)    | 2.71 (0.00, 8.38)    | 4.99 (0.00, 15.26)    | 0.14 (0.00, 0.41)     | 23.14 (0.00, 70.41)     | 40.62 (0.00, 123.55)    | 0.15 (0.00, 0.46)      | 25.72 (0.00, 77.88)     | 45.76 (0.00, 138.00)    |
| <b>Somalia</b>         | 2.96 (1.85, 4.35)    | 27.31 (17.04, 40.10) | 57.58 (36.03, 84.84)  | 5.51 (3.55, 7.90)     | 50.78 (32.77, 72.85)    | 89.84 (58.08, 129.98)   | 8.53 (5.80, 11.81)     | 78.63 (53.43, 108.87)   | 148.16 (100.71, 204.83) |
| <b>South Africa</b>    | 27.41 (17.89, 38.81) | 51.02 (33.31, 72.23) | 67.92 (44.54, 95.71)  | 81.03 (59.31, 102.93) | 150.82 (110.39, 191.60) | 190.53 (139.55, 242.61) | 108.75 (79.90, 138.51) | 202.42 (148.72, 257.83) | 259.46 (189.72, 330.98) |
| <b>South Korea</b>     | 24.09 (16.23, 33.14) | 47.91 (32.28, 65.91) | 35.22 (23.78, 48.74)  | 32.63 (21.06, 45.80)  | 64.89 (41.88, 91.08)    | 47.57 (31.30, 67.16)    | 56.83 (40.04, 75.77)   | 113.03 (79.62, 150.69)  | 83.04 (58.26, 110.17)   |
| <b>South Sudan</b>     | 4.16 (2.62, 5.98)    | 33.85 (21.28, 48.68) | 71.82 (44.86, 104.50) | 6.02 (3.84, 8.64)     | 48.97 (31.25, 70.29)    | 83.15 (52.95, 119.74)   | 10.22 (7.03, 13.78)    | 83.14 (57.24, 112.15)   | 155.42 (107.47, 212.16) |
| <b>Spain</b>           | 8.34 (4.81, 13.36)   | 17.11 (9.87, 27.41)  | 10.21 (5.88, 16.32)   | 11.66 (7.25, 17.41)   | 23.92 (14.87, 35.71)    | 11.96 (7.42, 17.73)     | 20.04 (12.24, 30.13)   | 41.11 (25.12, 61.80)    | 22.12 (13.53, 33.48)    |
| <b>Sri Lanka</b>       | 6.74 (4.41, 9.60)    | 32.50 (21.25, 46.29) | 32.31 (20.93, 45.89)  | 30.64 (20.66, 41.83)  | 147.68 (99.59, 201.61)  | 145.77 (100.00, 197.32) | 37.46 (26.07, 50.17)   | 180.56 (125.66, 241.80) | 178.26 (125.31, 238.47) |
| <b>Sudan</b>           | 17.14 (11.07, 24.14) | 42.44 (27.40, 59.77) | 75.61 (50.12, 105.62) | 54.41 (36.50, 74.99)  | 134.71 (90.36, 185.67)  | 234.94 (156.60, 330.04) | 71.81 (49.63, 95.93)   | 177.81 (122.88, 237.51) | 311.20 (213.50, 423.15) |
| <b>Suriname</b>        | 0.14 (0.09, 0.20)    | 25.84 (16.27, 37.78) | 29.49 (18.58, 43.47)  | 0.92 (0.64, 1.24)     | 169.52 (118.42, 228.60) | 193.35 (134.48, 259.66) | 1.06 (0.74, 1.42)      | 195.57 (136.51, 262.14) | 223.20 (155.73, 298.41) |
| <b>Swaziland</b>       | 0.44 (0.29, 0.64)    | 34.42 (22.15, 49.72) | 66.36 (42.53, 94.95)  | 1.07 (0.55, 1.69)     | 83.05 (42.89, 131.20)   | 159.16 (84.75, 252.88)  | 1.51 (0.93, 2.23)      | 117.26 (71.89, 173.20)  | 224.89 (141.20, 332.16) |
| <b>Sweden</b>          | 0.36 (0.05, 0.80)    | 3.69 (0.55, 8.14)    | 2.26 (0.34, 5.03)     | 0.59 (0.09, 1.22)     | 5.99 (0.87, 12.47)      | 3.22 (0.48, 6.74)       | 0.95 (0.14, 1.98)      | 9.73 (1.43, 20.17)      | 5.52 (0.82, 11.48)      |

|                            |                      |                       |                       |                         |                         |                         |                         |                         |                         |
|----------------------------|----------------------|-----------------------|-----------------------|-------------------------|-------------------------|-------------------------|-------------------------|-------------------------|-------------------------|
| <b>Switzerland</b>         | 1.71 (1.05, 2.59)    | 20.64 (12.68, 31.26)  | 13.02 (7.91, 19.65)   | 2.11 (1.34, 3.10)       | 25.54 (16.22, 37.49)    | 13.62 (8.63, 20.04)     | 3.84 (2.53, 5.47)       | 46.38 (30.56, 66.14)    | 26.68 (17.56, 38.31)    |
| <b>Syria</b>               | 7.11 (4.50, 10.34)   | 38.18 (24.18, 55.51)  | 60.33 (38.67, 86.39)  | 16.36 (10.44, 23.32)    | 87.86 (56.05, 125.22)   | 141.61 (81.93, 212.25)  | 23.61 (16.44, 31.59)    | 126.79 (88.26, 169.63)  | 201.75 (134.52, 283.36) |
| <b>Tajikistan</b>          | 2.82 (1.79, 4.05)    | 33.23 (21.02, 47.65)  | 58.23 (37.24, 83.38)  | 7.10 (4.96, 9.50)       | 83.52 (58.29, 111.75)   | 105.21 (73.36, 140.51)  | 9.96 (7.14, 13.14)      | 117.10 (84.04, 154.52)  | 163.73 (117.63, 214.65) |
| <b>Tanzania</b>            | 13.76 (8.49, 20.08)  | 25.79 (15.92, 37.61)  | 55.74 (35.21, 80.51)  | 27.22 (19.17, 36.19)    | 51.00 (35.92, 67.81)    | 87.12 (61.28, 116.64)   | 41.06 (29.18, 54.43)    | 76.94 (54.67, 101.99)   | 143.21 (100.95, 190.96) |
| <b>Thailand</b>            | 27.14 (17.67, 38.62) | 39.97 (26.03, 56.88)  | 33.88 (22.16, 47.79)  | 140.01 (101.18, 180.95) | 206.22 (149.02, 266.52) | 171.39 (123.59, 221.15) | 167.25 (121.13, 215.36) | 246.34 (178.41, 317.21) | 205.12 (148.73, 264.89) |
| <b>The Bahamas</b>         | 0.07 (0.05, 0.11)    | 19.36 (11.85, 29.42)  | 19.87 (12.22, 30.23)  | 0.41 (0.28, 0.57)       | 105.56 (71.18, 147.20)  | 105.35 (71.38, 147.16)  | 0.49 (0.33, 0.67)       | 125.28 (84.18, 173.53)  | 125.71 (84.37, 174.29)  |
| <b>The Gambia</b>          | 0.68 (0.42, 0.98)    | 33.86 (20.99, 48.78)  | 81.01 (51.16, 116.49) | 1.49 (1.01, 2.04)       | 74.24 (50.69, 102.08)   | 130.92 (90.23, 176.72)  | 2.17 (1.52, 2.89)       | 108.35 (76.15, 144.33)  | 212.34 (150.15, 281.19) |
| <b>Timor-Leste</b>         | 0.13 (0.08, 0.19)    | 10.59 (6.62, 15.79)   | 18.13 (11.17, 26.69)  | 0.55 (0.32, 0.85)       | 46.57 (27.21, 71.11)    | 71.35 (42.26, 109.34)   | 0.68 (0.42, 1.01)       | 57.16 (35.65, 84.79)    | 90.03 (56.96, 132.62)   |
| <b>Togo</b>                | 2.88 (1.81, 4.13)    | 39.41 (24.84, 56.55)  | 78.92 (50.62, 112.90) | 6.49 (3.96, 9.52)       | 88.94 (54.21, 130.42)   | 140.32 (86.84, 207.76)  | 9.36 (6.26, 13.02)      | 128.21 (85.77, 178.27)  | 220.62 (147.56, 303.58) |
| <b>Tonga</b>               | 0.00 (0.00, 0.00)    | 0.00 (0.00, 4.34)     | 0.00 (0.00, 6.18)     | 0.00 (0.00, 0.03)       | 0.00 (0.00, 27.12)      | 0.00 (0.00, 39.21)      | 0.00 (0.00, 0.03)       | 0.00 (0.00, 31.16)      | 0.00 (0.00, 45.13)      |
| <b>Trinidad and Tobago</b> | 0.36 (0.22, 0.54)    | 26.48 (16.42, 39.35)  | 24.67 (15.46, 36.58)  | 1.76 (1.20, 2.41)       | 129.36 (88.11, 177.01)  | 117.31 (79.95, 160.41)  | 2.12 (1.45, 2.91)       | 155.66 (106.50, 213.89) | 142.26 (97.78, 193.90)  |
| <b>Tunisia</b>             | 7.08 (4.62, 9.84)    | 62.89 (41.10, 87.50)  | 64.17 (42.47, 90.61)  | 16.92 (10.83, 24.13)    | 150.41 (96.24, 214.47)  | 166.49 (106.85, 237.69) | 24.11 (16.42, 33.07)    | 214.31 (145.96, 293.94) | 230.95 (156.75, 318.41) |
| <b>Turkey</b>              | 63.22 (41.62, 88.48) | 80.61 (53.08, 112.82) | 86.19 (56.33, 121.10) | 79.28 (54.93, 107.65)   | 101.09 (70.05, 137.27)  | 113.99 (78.91, 153.13)  | 143.05 (102.67, 187.25) | 182.41 (130.92, 238.78) | 200.99 (144.30, 264.54) |

|                             |                       |                      |                       |                        |                         |                         |                         |                         |                         |
|-----------------------------|-----------------------|----------------------|-----------------------|------------------------|-------------------------|-------------------------|-------------------------|-------------------------|-------------------------|
| <b>Turkmenistan</b>         | 2.53 (1.63, 3.64)     | 47.09 (30.30, 67.69) | 67.91 (42.54, 98.10)  | 8.66 (6.36, 10.90)     | 160.90 (118.25, 202.64) | 198.23 (145.67, 249.49) | 11.23 (8.23, 14.21)     | 208.67 (152.91, 264.14) | 266.68 (195.69, 338.43) |
| <b>Uganda</b>               | 9.17 (5.72, 13.20)    | 23.42 (14.61, 33.71) | 60.85 (38.80, 87.27)  | 19.21 (13.48, 25.56)   | 49.06 (34.42, 65.29)    | 95.39 (67.65, 125.88)   | 28.37 (20.17, 37.25)    | 72.46 (51.51, 95.13)    | 156.82 (111.58, 207.31) |
| <b>Ukraine</b>              | 13.52 (8.37, 19.79)   | 29.06 (18.00, 42.55) | 20.19 (12.64, 29.78)  | 13.19 (8.56, 18.92)    | 28.36 (18.41, 40.67)    | 21.20 (13.61, 30.58)    | 26.74 (18.11, 36.66)    | 57.49 (38.94, 78.83)    | 41.62 (28.40, 57.65)    |
| <b>United Arab Emirates</b> | 4.95 (3.20, 7.04)     | 54.16 (34.96, 76.97) | 74.23 (48.95, 105.11) | 11.09 (6.58, 16.60)    | 121.26 (71.91, 181.56)  | 226.66 (140.67, 329.49) | 16.03 (10.55, 22.82)    | 175.24 (115.35, 249.54) | 302.07 (200.89, 419.93) |
| <b>United Kingdom</b>       | 9.60 (5.90, 14.42)    | 14.94 (9.19, 22.45)  | 9.70 (6.06, 14.53)    | 11.85 (8.08, 16.24)    | 18.45 (12.57, 25.27)    | 11.01 (7.52, 15.09)     | 21.50 (14.36, 30.15)    | 33.47 (22.35, 46.93)    | 20.75 (13.83, 29.21)    |
| <b>United States</b>        | 61.54 (32.36, 105.07) | 19.02 (10.00, 32.48) | 14.51 (7.59, 24.72)   | 104.78 (58.14, 165.08) | 32.39 (17.97, 51.03)    | 23.30 (12.96, 36.77)    | 166.61 (91.84, 264.98)  | 51.50 (28.39, 81.90)    | 37.92 (20.91, 60.47)    |
| <b>Uruguay</b>              | 0.71 (0.43, 1.08)     | 20.69 (12.56, 31.57) | 15.67 (9.62, 24.00)   | 1.53 (1.01, 2.16)      | 44.42 (29.32, 62.88)    | 32.94 (21.77, 46.83)    | 2.24 (1.47, 3.18)       | 65.20 (42.90, 92.65)    | 48.80 (31.93, 69.47)    |
| <b>Uzbekistan</b>           | 11.53 (7.50, 16.42)   | 38.51 (25.05, 54.83) | 53.53 (34.39, 76.99)  | 39.04 (28.32, 50.30)   | 130.39 (94.60, 167.99)  | 148.03 (107.44, 190.30) | 50.65 (36.81, 64.96)    | 169.18 (122.95, 216.98) | 201.97 (146.53, 259.25) |
| <b>Vanuatu</b>              | 0.01 (0.00, 0.03)     | 5.58 (1.61, 11.49)   | 9.25 (2.66, 19.08)    | 0.12 (0.03, 0.25)      | 45.10 (12.84, 94.05)    | 71.48 (20.34, 148.26)   | 0.13 (0.04, 0.28)       | 51.16 (14.58, 106.04)   | 80.50 (23.32, 165.50)   |
| <b>Venezuela</b>            | 11.03 (7.21, 15.68)   | 35.44 (23.19, 50.42) | 44.25 (29.06, 63.09)  | 56.58 (40.06, 75.49)   | 181.91 (128.77, 242.68) | 224.40 (158.78, 299.11) | 67.82 (48.29, 88.71)    | 218.03 (155.25, 285.18) | 269.20 (192.79, 351.74) |
| <b>Vietnam</b>              | 20.60 (13.42, 29.12)  | 22.04 (14.36, 31.16) | 24.02 (15.53, 34.04)  | 123.68 (88.51, 161.51) | 132.32 (94.69, 172.79)  | 147.11 (105.04, 192.10) | 144.22 (103.44, 188.31) | 154.29 (110.66, 201.46) | 171.04 (123.43, 221.91) |
| <b>Virgin Islands, U.S.</b> | 0.03 (0.02, 0.05)     | 31.63 (19.64, 46.93) | 21.89 (13.33, 32.72)  | 0.17 (0.12, 0.23)      | 159.81 (109.28, 220.35) | 106.73 (72.23, 147.83)  | 0.21 (0.14, 0.28)       | 192.64 (132.92, 261.64) | 128.74 (88.45, 176.67)  |
| <b>Yemen</b>                | 10.76 (6.86, 15.33)   | 39.99 (25.51, 56.97) | 83.25 (54.04, 117.66) | 30.76 (18.58, 44.88)   | 114.32 (69.06, 166.75)  | 243.61 (148.90, 356.94) | 41.43 (27.53, 58.27)    | 153.93 (102.30, 216.52) | 327.43 (212.41, 459.04) |



|                 |                   |                      |                       |                     |                       |                         |                      |                        |                         |
|-----------------|-------------------|----------------------|-----------------------|---------------------|-----------------------|-------------------------|----------------------|------------------------|-------------------------|
| <b>Zambia</b>   | 4.42 (2.80, 6.28) | 27.20 (17.24, 38.63) | 60.68 (38.79, 86.73)  | 10.69 (7.18, 14.66) | 65.77 (44.21, 90.22)  | 119.87 (80.00, 165.72)  | 15.13 (10.63, 20.18) | 93.12 (65.40, 124.18)  | 181.28 (127.74, 242.93) |
| <b>Zimbabwe</b> | 5.27 (3.33, 7.56) | 33.85 (21.41, 48.53) | 71.70 (45.37, 103.06) | 14.99 (9.74, 21.22) | 96.26 (62.54, 136.27) | 205.12 (133.09, 292.11) | 20.33 (13.95, 27.55) | 130.52 (89.56, 176.88) | 278.23 (188.52, 380.20) |

**YLD, Years living with disability; YLL, Years of life lost; DALY, Disability adjusted life years**

**Supplemental table 3:** Frontier analysis for age standardized disability adjusted life years (DALY) rates and risk deleted DALY rates by Socio-demographic Index (SDI).

| Country                    | Region                  | Socio-demographic Index | DALY (Per 100,000) | Frontier (DALY Per 100,000) | Effective Difference (DALY Per 100,000) | Risk Deleted       |                             |                                         |
|----------------------------|-------------------------|-------------------------|--------------------|-----------------------------|-----------------------------------------|--------------------|-----------------------------|-----------------------------------------|
|                            |                         |                         |                    |                             |                                         | DALY (Per 100,000) | Frontier (DALY Per 100,000) | Effective Difference (DALY Per 100,000) |
| <b>Afghanistan</b>         | West & Central Asia     | 0.289                   | 616.34             | 116.07                      | 500.27                                  | 254.21             | 54.46                       | 199.75                                  |
| <b>Albania</b>             | Europe                  | 0.736                   | 80.29              | 8.72                        | 71.57                                   | 58.44              | 0.60                        | 57.83                                   |
| <b>Algeria</b>             | North Africa            | 0.590                   | 233.92             | 39.80                       | 194.13                                  | 93.55              | 6.71                        | 86.84                                   |
| <b>American Samoa</b>      | Oceania                 | 0.714                   | 0.00               | 2.83                        | 0.00                                    | 0.00               | 0.23                        | 0.00                                    |
| <b>Andorra</b>             | Europe                  | 0.919                   | 12.19              | 1.35                        | 10.84                                   | 6.40               | 0.12                        | 6.27                                    |
| <b>Angola</b>              | Sub-Saharan Africa      | 0.419                   | 151.41             | 84.75                       | 66.66                                   | 75.46              | 37.27                       | 38.19                                   |
| <b>Antigua and Barbuda</b> | North & Central America | 0.841                   | 119.87             | 3.49                        | 116.38                                  | 61.13              | 0.25                        | 60.88                                   |
| <b>Argentina</b>           | South America           | 0.772                   | 88.69              | 4.97                        | 83.71                                   | 41.39              | 0.29                        | 41.10                                   |
| <b>Armenia</b>             | West & Central Asia     | 0.755                   | 118.22             | 6.88                        | 111.34                                  | 59.73              | 0.57                        | 59.16                                   |
| <b>Australia</b>           | Oceania                 | 0.915                   | 6.46               | 1.18                        | 5.28                                    | 2.13               | 0.09                        | 2.04                                    |



|                               |                                  |       |        |        |        |        |       |        |
|-------------------------------|----------------------------------|-------|--------|--------|--------|--------|-------|--------|
| <b>Austria</b>                | Europe                           | 0.888 | 52.55  | 2.56   | 50.00  | 24.99  | 0.17  | 24.81  |
| <b>Azerbaijan</b>             | West & Central Asia              | 0.788 | 173.98 | 5.28   | 168.70 | 94.95  | 0.33  | 94.63  |
| <b>Bahrain</b>                | West & Central Asia              | 0.776 | 234.56 | 4.80   | 229.76 | 86.84  | 0.25  | 86.58  |
| <b>Bangladesh</b>             | South & Southeast Asia           | 0.472 | 183.21 | 62.05  | 121.16 | 80.55  | 18.48 | 62.07  |
| <b>Barbados</b>               | North & Central America          | 0.782 | 110.85 | 5.00   | 105.84 | 56.37  | 0.33  | 56.04  |
| <b>Belarus</b>                | East Asia                        | 0.847 | 49.26  | 3.59   | 45.67  | 33.58  | 0.25  | 33.33  |
| <b>Belgium</b>                | Europe                           | 0.882 | 35.87  | 3.56   | 32.31  | 18.20  | 0.18  | 18.01  |
| <b>Belize</b>                 | Mesoamerica (or Central America) | 0.665 | 356.94 | 14.40  | 342.54 | 184.41 | 1.25  | 183.16 |
| <b>Benin</b>                  | Sub-Saharan Africa               | 0.345 | 254.04 | 105.60 | 148.45 | 132.65 | 48.47 | 84.18  |
| <b>Bermuda</b>                | North & Central America          | 0.916 | 36.76  | 1.44   | 35.32  | 17.23  | 0.13  | 17.10  |
| <b>Bhutan</b>                 | South & Southeast Asia           | 0.532 | 220.68 | 46.18  | 174.49 | 87.52  | 10.15 | 77.37  |
| <b>Bolivia</b>                | South America                    | 0.612 | 316.08 | 41.66  | 274.43 | 164.20 | 6.46  | 157.74 |
| <b>Bosnia and Herzegovina</b> | Europe                           | 0.739 | 100.14 | 9.33   | 90.82  | 56.03  | 0.61  | 55.42  |
| <b>Botswana</b>               | Sub-Saharan Africa               | 0.641 | 151.38 | 16.86  | 134.52 | 71.40  | 1.69  | 69.71  |
| <b>Brazil</b>                 | South America                    | 0.662 | 64.76  | 14.60  | 50.17  | 32.98  | 1.42  | 31.56  |
| <b>Brunei</b>                 | South & Southeast Asia           | 0.923 | 10.86  | 0.95   | 9.91   | 2.89   | 0.06  | 2.83   |
| <b>Bulgaria</b>               | Europe                           | 0.808 | 105.94 | 4.59   | 101.35 | 60.69  | 0.33  | 60.36  |
| <b>Burkina Faso</b>           | Sub-Saharan Africa               | 0.237 | 190.49 | 175.07 | 15.41  | 95.27  | 86.52 | 8.75   |
| <b>Burundi</b>                | Sub-Saharan Africa               | 0.240 | 149.74 | 142.05 | 7.69   | 77.83  | 70.89 | 6.95   |
| <b>Cambodia</b>               | South & Southeast Asia           | 0.486 | 194.04 | 45.95  | 148.09 | 29.25  | 9.69  | 19.57  |
| <b>Cameroon</b>               | Sub-Saharan Africa               | 0.464 | 255.04 | 69.10  | 185.94 | 133.55 | 20.26 | 113.29 |

|                                         |                                  |       |        |        |        |        |       |       |
|-----------------------------------------|----------------------------------|-------|--------|--------|--------|--------|-------|-------|
| <b>Canada</b>                           | North America                    | 0.938 | 12.13  | 1.20   | 10.94  | 3.51   | 0.12  | 3.38  |
| <b>Cape Verde</b>                       | Sub-Saharan Africa               | 0.549 | 210.82 | 43.63  | 167.18 | 101.07 | 8.52  | 92.55 |
| <b>Central African Republic</b>         | Sub-Saharan Africa               | 0.282 | 191.79 | 134.31 | 57.48  | 97.07  | 63.65 | 33.42 |
| <b>Chad</b>                             | Sub-Saharan Africa               | 0.287 | 264.19 | 113.38 | 150.81 | 139.83 | 53.35 | 86.48 |
| <b>Chile</b>                            | South America                    | 0.805 | 129.54 | 5.44   | 124.10 | 58.36  | 0.35  | 58.01 |
| <b>China</b>                            | East Asia                        | 0.678 | 105.79 | 14.21  | 91.58  | 20.33  | 1.30  | 19.03 |
| <b>Colombia</b>                         | South America                    | 0.700 | 127.67 | 14.30  | 113.37 | 66.21  | 1.14  | 65.07 |
| <b>Comoros</b>                          | Sub-Saharan Africa               | 0.365 | 103.08 | 83.92  | 19.17  | 51.34  | 38.59 | 12.74 |
| <b>Congo</b>                            | Sub-Saharan Africa               | 0.527 | 165.95 | 47.33  | 118.62 | 81.54  | 10.61 | 70.93 |
| <b>Costa Rica</b>                       | Mesoamerica (or Central America) | 0.723 | 174.96 | 8.10   | 166.86 | 85.79  | 0.48  | 85.31 |
| <b>Cote d'Ivoire</b>                    | Sub-Saharan Africa               | 0.381 | 270.82 | 89.20  | 181.62 | 137.83 | 40.47 | 97.36 |
| <b>Croatia</b>                          | Europe                           | 0.784 | 69.03  | 4.71   | 64.31  | 34.25  | 0.27  | 33.97 |
| <b>Cuba</b>                             | North & Central America          | 0.766 | 87.58  | 4.73   | 82.85  | 43.90  | 0.36  | 43.54 |
| <b>Cyprus</b>                           | West & Central Asia              | 0.881 | 78.41  | 3.63   | 74.78  | 40.49  | 0.26  | 40.23 |
| <b>Czech Republic</b>                   | Europe                           | 0.892 | 58.62  | 2.54   | 56.08  | 32.15  | 0.18  | 31.98 |
| <b>Democratic Republic of the Congo</b> | Sub-Saharan Africa               | 0.239 | 143.94 | 142.01 | 1.93   | 71.79  | 69.93 | 1.86  |
| <b>Denmark</b>                          | Europe                           | 0.910 | 23.27  | 1.52   | 21.75  | 12.35  | 0.11  | 12.24 |
| <b>Djibouti</b>                         | Sub-Saharan Africa               | 0.462 | 159.20 | 68.65  | 90.55  | 78.25  | 20.59 | 57.66 |
| <b>Dominica</b>                         | North & Central America          | 0.753 | 170.57 | 7.01   | 163.56 | 84.96  | 0.56  | 84.40 |
| <b>Dominican Republic</b>               | North & Central America          | 0.684 | 143.44 | 14.86  | 128.58 | 75.39  | 1.34  | 74.05 |
| <b>Ecuador</b>                          | South America                    | 0.685 | 142.20 | 12.78  | 129.42 | 71.94  | 1.13  | 70.80 |

|                                           |                                        |       |        |        |        |        |       |        |
|-------------------------------------------|----------------------------------------|-------|--------|--------|--------|--------|-------|--------|
| <b>Egypt</b>                              | North Africa                           | 0.619 | 273.55 | 40.74  | 232.80 | 110.54 | 6.36  | 104.19 |
| <b>El Salvador</b>                        | Mesoamerica<br>(or Central<br>America) | 0.619 | 543.35 | 41.79  | 501.56 | 270.61 | 6.88  | 263.74 |
| <b>Equatorial Guinea</b>                  | Sub-Saharan<br>Africa                  | 0.609 | 127.91 | 41.46  | 86.45  | 61.33  | 6.54  | 54.79  |
| <b>Eritrea</b>                            | Sub-Saharan<br>Africa                  | 0.324 | 156.58 | 102.14 | 54.45  | 79.37  | 47.31 | 32.06  |
| <b>Estonia</b>                            | Europe                                 | 0.861 | 25.83  | 3.33   | 22.49  | 13.73  | 0.23  | 13.50  |
| <b>Ethiopia</b>                           | Sub-Saharan<br>Africa                  | 0.302 | 177.87 | 110.01 | 67.86  | 88.62  | 51.26 | 37.36  |
| <b>Federated States of<br/>Micronesia</b> | Oceania                                | 0.624 | 80.06  | 21.75  | 58.31  | 10.95  | 1.86  | 9.09   |
| <b>Fiji</b>                               | Oceania                                | 0.693 | 74.23  | 12.92  | 61.31  | 12.32  | 0.92  | 11.40  |
| <b>Finland</b>                            | Europe                                 | 0.893 | 6.67   | 1.45   | 5.22   | 3.32   | 0.13  | 3.19   |
| <b>France</b>                             | Europe                                 | 0.834 | 21.98  | 3.49   | 18.48  | 11.39  | 0.29  | 11.10  |
| <b>Gabon</b>                              | Sub-Saharan<br>Africa                  | 0.644 | 169.15 | 15.21  | 153.94 | 80.92  | 1.37  | 79.55  |
| <b>Georgia</b>                            | West & Central<br>Asia                 | 0.761 | 162.56 | 4.45   | 158.11 | 91.66  | 0.33  | 91.34  |
| <b>Germany</b>                            | Europe                                 | 0.903 | 39.52  | 1.59   | 37.94  | 19.02  | 0.15  | 18.87  |
| <b>Ghana</b>                              | Sub-Saharan<br>Africa                  | 0.511 | 221.70 | 46.74  | 174.96 | 111.84 | 11.38 | 100.46 |
| <b>Greece</b>                             | Europe                                 | 0.825 | 42.42  | 4.12   | 38.30  | 19.09  | 0.35  | 18.74  |
| <b>Greenland</b>                          | Europe                                 | 0.758 | 6.15   | 2.04   | 4.10   | 1.48   | 0.16  | 1.33   |
| <b>Grenada</b>                            | North & Central<br>America             | 0.753 | 212.35 | 7.33   | 205.03 | 110.85 | 0.58  | 110.27 |
| <b>Guam</b>                               | Oceania                                | 0.884 | 50.69  | 3.51   | 47.17  | 7.89   | 0.21  | 7.68   |
| <b>Guatemala</b>                          | Mesoamerica<br>(or Central<br>America) | 0.543 | 408.41 | 42.19  | 366.22 | 205.05 | 8.06  | 197.00 |
| <b>Guinea</b>                             | Sub-Saharan<br>Africa                  | 0.278 | 200.40 | 148.97 | 51.42  | 102.86 | 72.22 | 30.64  |
| <b>Guinea-Bissau</b>                      | Sub-Saharan<br>Africa                  | 0.294 | 349.02 | 115.70 | 233.32 | 178.80 | 54.47 | 124.32 |
| <b>Guyana</b>                             | South America                          | 0.655 | 193.49 | 15.00  | 178.49 | 101.06 | 1.33  | 99.73  |

|                   |                                  |       |        |       |        |        |       |        |
|-------------------|----------------------------------|-------|--------|-------|--------|--------|-------|--------|
| <b>Haiti</b>      | North & Central America          | 0.412 | 336.51 | 87.21 | 249.30 | 186.15 | 39.17 | 146.98 |
| <b>Honduras</b>   | Mesoamerica (or Central America) | 0.568 | 429.86 | 43.74 | 386.12 | 216.42 | 7.94  | 208.49 |
| <b>Hungary</b>    | Europe                           | 0.849 | 73.26  | 3.96  | 69.29  | 37.00  | 0.29  | 36.72  |
| <b>Iceland</b>    | Europe                           | 0.893 | 8.05   | 1.32  | 6.72   | 4.67   | 0.10  | 4.56   |
| <b>India</b>      | South & Southeast Asia           | 0.556 | 238.25 | 41.39 | 196.86 | 96.78  | 8.04  | 88.74  |
| <b>Indonesia</b>  | South & Southeast Asia           | 0.652 | 122.19 | 15.71 | 106.48 | 21.58  | 1.40  | 20.18  |
| <b>Iran</b>       | West & Central Asia              | 0.715 | 176.65 | 8.26  | 168.39 | 65.88  | 0.58  | 65.30  |
| <b>Iraq</b>       | West & Central Asia              | 0.576 | 419.84 | 43.41 | 376.43 | 162.62 | 7.59  | 155.02 |
| <b>Ireland</b>    | Europe                           | 0.885 | 18.27  | 2.28  | 15.99  | 9.74   | 0.18  | 9.56   |
| <b>Israel</b>     | West & Central Asia              | 0.842 | 124.05 | 3.98  | 120.07 | 31.83  | 0.33  | 31.50  |
| <b>Italy</b>      | Europe                           | 0.856 | 48.45  | 3.83  | 44.62  | 25.21  | 0.29  | 24.92  |
| <b>Jamaica</b>    | North & Central America          | 0.719 | 182.02 | 7.82  | 174.20 | 93.27  | 0.54  | 92.73  |
| <b>Japan</b>      | East Asia                        | 0.896 | 45.26  | 1.46  | 43.80  | 14.88  | 0.12  | 14.75  |
| <b>Jordan</b>     | West & Central Asia              | 0.695 | 295.39 | 13.45 | 281.94 | 100.48 | 1.30  | 99.18  |
| <b>Kazakhstan</b> | West & Central Asia              | 0.807 | 111.27 | 4.60  | 106.67 | 55.28  | 0.31  | 54.97  |
| <b>Kenya</b>      | Sub-Saharan Africa               | 0.472 | 67.96  | 53.14 | 14.82  | 34.27  | 17.23 | 17.04  |
| <b>Kiribati</b>   | Oceania                          | 0.478 | 0.00   | 5.25  | 0.00   | 0.00   | 0.85  | 0.00   |
| <b>Kuwait</b>     | West & Central Asia              | 0.862 | 158.85 | 3.98  | 154.87 | 58.61  | 0.27  | 58.34  |
| <b>Kyrgyzstan</b> | West & Central Asia              | 0.631 | 117.48 | 22.37 | 95.11  | 64.36  | 2.40  | 61.96  |
| <b>Laos</b>       | South & Southeast Asia           | 0.508 | 261.99 | 43.67 | 218.32 | 49.83  | 10.94 | 38.89  |
| <b>Latvia</b>     | Europe                           | 0.861 | 66.97  | 3.67  | 63.30  | 47.11  | 0.27  | 46.84  |

|                         |                                  |       |        |        |        |        |        |        |
|-------------------------|----------------------------------|-------|--------|--------|--------|--------|--------|--------|
| <b>Lebanon</b>          | West & Central Asia              | 0.755 | 113.49 | 6.75   | 106.74 | 45.38  | 0.53   | 44.85  |
| <b>Lesotho</b>          | Sub-Saharan Africa               | 0.522 | 265.75 | 47.44  | 218.31 | 126.81 | 10.02  | 116.79 |
| <b>Liberia</b>          | Sub-Saharan Africa               | 0.283 | 54.40  | 52.54  | 1.86   | 26.86  | 25.75  | 1.11   |
| <b>Libya</b>            | North Africa                     | 0.643 | 304.55 | 15.06  | 289.49 | 110.95 | 1.39   | 109.56 |
| <b>Lithuania</b>        | Europe                           | 0.837 | 52.62  | 3.79   | 48.83  | 35.49  | 0.34   | 35.15  |
| <b>Luxembourg</b>       | Europe                           | 0.911 | 38.94  | 1.64   | 37.30  | 20.17  | 0.12   | 20.05  |
| <b>Macedonia</b>        | Europe                           | 0.762 | 119.39 | 4.17   | 115.22 | 69.67  | 0.27   | 69.40  |
| <b>Madagascar</b>       | Sub-Saharan Africa               | 0.370 | 107.07 | 83.69  | 23.37  | 54.45  | 38.52  | 15.93  |
| <b>Malawi</b>           | Sub-Saharan Africa               | 0.309 | 146.34 | 105.99 | 40.35  | 73.88  | 48.96  | 24.92  |
| <b>Malaysia</b>         | South & Southeast Asia           | 0.767 | 95.26  | 5.08   | 90.18  | 10.32  | 0.32   | 10.00  |
| <b>Maldives</b>         | South & Southeast Asia           | 0.623 | 237.75 | 25.14  | 212.60 | 28.75  | 2.42   | 26.33  |
| <b>Mali</b>             | Sub-Saharan Africa               | 0.231 | 225.22 | 198.87 | 26.35  | 116.72 | 101.45 | 15.27  |
| <b>Malta</b>            | Europe                           | 0.806 | 49.99  | 4.82   | 45.17  | 25.70  | 0.33   | 25.38  |
| <b>Marshall Islands</b> | Oceania                          | 0.592 | 199.34 | 41.81  | 157.53 | 34.19  | 5.89   | 28.31  |
| <b>Mauritania</b>       | Sub-Saharan Africa               | 0.401 | 216.06 | 87.44  | 128.62 | 109.51 | 39.38  | 70.13  |
| <b>Mauritius</b>        | Sub-Saharan Africa               | 0.735 | 315.62 | 8.43   | 307.19 | 35.60  | 0.47   | 35.13  |
| <b>Mexico</b>           | Mesoamerica (or Central America) | 0.718 | 455.29 | 8.25   | 447.04 | 218.43 | 0.70   | 217.73 |
| <b>Moldova</b>          | East Asia                        | 0.703 | 49.92  | 12.12  | 37.80  | 33.98  | 1.10   | 32.88  |
| <b>Mongolia</b>         | East Asia                        | 0.705 | 232.09 | 12.51  | 219.59 | 122.00 | 1.12   | 120.89 |
| <b>Montenegro</b>       | Europe                           | 0.799 | 114.41 | 4.67   | 109.74 | 54.08  | 0.30   | 53.78  |
| <b>Morocco</b>          | North Africa                     | 0.496 | 264.23 | 45.46  | 218.77 | 120.60 | 11.21  | 109.39 |
| <b>Mozambique</b>       | Sub-Saharan Africa               | 0.278 | 117.80 | 113.00 | 4.80   | 59.03  | 53.99  | 5.05   |

|                                 |                                  |       |        |        |        |        |        |        |
|---------------------------------|----------------------------------|-------|--------|--------|--------|--------|--------|--------|
| <b>Myanmar</b>                  | South & Southeast Asia           | 0.520 | 228.69 | 47.08  | 181.62 | 33.54  | 9.52   | 24.02  |
| <b>Namibia</b>                  | Sub-Saharan Africa               | 0.617 | 161.94 | 41.24  | 120.69 | 75.52  | 6.97   | 68.55  |
| <b>Nepal</b>                    | South & Southeast Asia           | 0.423 | 238.33 | 87.48  | 150.85 | 89.43  | 38.56  | 50.86  |
| <b>Netherlands</b>              | Europe                           | 0.894 | 29.64  | 1.50   | 28.14  | 15.80  | 0.11   | 15.70  |
| <b>New Zealand</b>              | Oceania                          | 0.884 | 5.98   | 1.50   | 4.47   | 1.64   | 0.10   | 1.54   |
| <b>Nicaragua</b>                | Mesoamerica (or Central America) | 0.563 | 486.52 | 43.63  | 442.89 | 246.19 | 8.38   | 237.81 |
| <b>Niger</b>                    | Sub-Saharan Africa               | 0.147 | 231.08 | 235.99 | 0.00   | 120.56 | 124.29 | 0.00   |
| <b>Nigeria</b>                  | Sub-Saharan Africa               | 0.474 | 117.66 | 62.18  | 55.48  | 58.08  | 18.17  | 39.91  |
| <b>North Korea</b>              | East Asia                        | 0.565 | 153.80 | 42.37  | 111.43 | 31.95  | 7.70   | 24.24  |
| <b>Northern Mariana Islands</b> | Oceania                          | 0.841 | 152.32 | 3.75   | 148.57 | 22.46  | 0.35   | 22.12  |
| <b>Norway</b>                   | Europe                           | 0.937 | 11.76  | 1.14   | 10.62  | 6.83   | 0.09   | 6.74   |
| <b>Oman</b>                     | West & Central Asia              | 0.730 | 184.57 | 8.46   | 176.11 | 68.64  | 0.66   | 67.98  |
| <b>Pakistan</b>                 | West & Central Asia              | 0.468 | 254.25 | 70.13  | 184.12 | 108.52 | 19.77  | 88.75  |
| <b>Palestine</b>                | West & Central Asia              | 0.567 | 391.28 | 43.89  | 347.39 | 150.15 | 8.07   | 142.08 |
| <b>Panama</b>                   | Mesoamerica (or Central America) | 0.747 | 114.94 | 8.33   | 106.61 | 57.45  | 0.61   | 56.84  |
| <b>Papua New Guinea</b>         | Oceania                          | 0.448 | 188.56 | 85.54  | 103.02 | 35.56  | 26.98  | 8.58   |
| <b>Paraguay</b>                 | South America                    | 0.644 | 171.06 | 15.11  | 155.95 | 84.08  | 1.44   | 82.64  |
| <b>Peru</b>                     | South America                    | 0.705 | 160.05 | 12.58  | 147.47 | 86.35  | 1.11   | 85.24  |
| <b>Philippines</b>              | South & Southeast Asia           | 0.645 | 394.64 | 15.17  | 379.47 | 58.03  | 1.34   | 56.69  |
| <b>Poland</b>                   | Europe                           | 0.868 | 71.27  | 3.68   | 67.59  | 31.64  | 0.24   | 31.40  |
| <b>Portugal</b>                 | Europe                           | 0.752 | 26.99  | 5.72   | 21.27  | 10.69  | 0.44   | 10.24  |

|                                         |                         |       |        |        |        |        |       |        |
|-----------------------------------------|-------------------------|-------|--------|--------|--------|--------|-------|--------|
| <b>Puerto Rico</b>                      | North & Central America | 0.882 | 145.37 | 3.51   | 141.86 | 67.38  | 0.24  | 67.14  |
| <b>Qatar</b>                            | West & Central Asia     | 0.805 | 180.00 | 4.77   | 175.22 | 66.70  | 0.27  | 66.43  |
| <b>Romania</b>                          | Europe                  | 0.799 | 69.60  | 4.40   | 65.20  | 44.40  | 0.25  | 44.15  |
| <b>Russia</b>                           | East Asia               | 0.856 | 51.29  | 3.13   | 48.16  | 36.80  | 0.20  | 36.61  |
| <b>Rwanda</b>                           | Sub-Saharan Africa      | 0.371 | 121.20 | 86.13  | 35.07  | 61.80  | 39.03 | 22.77  |
| <b>Saint Lucia</b>                      | North & Central America | 0.741 | 126.62 | 8.57   | 118.05 | 65.96  | 0.64  | 65.32  |
| <b>Saint Vincent and the Grenadines</b> | North & Central America | 0.747 | 155.22 | 6.95   | 148.26 | 80.30  | 0.47  | 79.83  |
| <b>Samoa</b>                            | Oceania                 | 0.637 | 0.00   | 3.62   | 0.00   | 0.00   | 0.28  | 0.00   |
| <b>Sao Tome and Principe</b>            | Sub-Saharan Africa      | 0.448 | 201.80 | 88.19  | 113.61 | 101.72 | 38.89 | 62.82  |
| <b>Saudi Arabia</b>                     | West & Central Asia     | 0.759 | 291.08 | 4.78   | 286.30 | 98.26  | 0.28  | 97.98  |
| <b>Senegal</b>                          | Sub-Saharan Africa      | 0.334 | 280.40 | 102.79 | 177.61 | 140.37 | 47.36 | 93.02  |
| <b>Serbia</b>                           | Europe                  | 0.772 | 102.82 | 4.48   | 98.34  | 51.91  | 0.29  | 51.62  |
| <b>Seychelles</b>                       | Sub-Saharan Africa      | 0.759 | 182.95 | 4.62   | 178.33 | 22.80  | 0.35  | 22.45  |
| <b>Sierra Leone</b>                     | Sub-Saharan Africa      | 0.323 | 173.17 | 104.57 | 68.60  | 90.51  | 48.64 | 41.88  |
| <b>Singapore</b>                        | South & Southeast Asia  | 0.881 | 91.04  | 3.63   | 87.41  | 18.29  | 0.23  | 18.06  |
| <b>Slovakia</b>                         | Europe                  | 0.862 | 75.35  | 3.57   | 71.79  | 31.91  | 0.26  | 31.65  |
| <b>Slovenia</b>                         | Europe                  | 0.856 | 41.95  | 3.99   | 37.96  | 23.08  | 0.25  | 22.83  |
| <b>Solomon Islands</b>                  | Oceania                 | 0.461 | 45.76  | 46.46  | 0.00   | 5.56   | 7.81  | 0.00   |
| <b>Somalia</b>                          | Sub-Saharan Africa      | 0.151 | 148.16 | 152.80 | 0.00   | 74.94  | 77.75 | 0.00   |
| <b>South Africa</b>                     | Sub-Saharan Africa      | 0.716 | 259.46 | 9.56   | 249.90 | 129.46 | 0.74  | 128.72 |
| <b>South Korea</b>                      | East Asia               | 0.871 | 83.04  | 3.56   | 79.48  | 13.10  | 0.24  | 12.86  |
| <b>South Sudan</b>                      | Sub-Saharan Africa      | 0.262 | 155.42 | 143.99 | 11.43  | 76.43  | 69.55 | 6.88   |



|                            |                         |       |        |        |        |        |       |        |
|----------------------------|-------------------------|-------|--------|--------|--------|--------|-------|--------|
| <b>Spain</b>               | Europe                  | 0.819 | 22.12  | 3.70   | 18.42  | 11.46  | 0.31  | 11.15  |
| <b>Sri Lanka</b>           | South & Southeast Asia  | 0.705 | 178.26 | 11.82  | 166.44 | 22.96  | 0.80  | 22.16  |
| <b>Sudan</b>               | Sub-Saharan Africa      | 0.428 | 311.20 | 87.18  | 224.02 | 131.93 | 38.53 | 93.40  |
| <b>Suriname</b>            | South America           | 0.704 | 223.20 | 12.16  | 211.04 | 113.99 | 1.15  | 112.84 |
| <b>Swaziland</b>           | Sub-Saharan Africa      | 0.623 | 224.89 | 24.67  | 200.22 | 106.71 | 3.16  | 103.55 |
| <b>Sweden</b>              | Europe                  | 0.892 | 5.52   | 1.40   | 4.12   | 3.04   | 0.12  | 2.92   |
| <b>Switzerland</b>         | Europe                  | 0.928 | 26.68  | 1.37   | 25.31  | 11.53  | 0.11  | 11.42  |
| <b>Syria</b>               | West & Central Asia     | 0.579 | 201.75 | 41.84  | 159.91 | 80.22  | 7.90  | 72.32  |
| <b>Tajikistan</b>          | West & Central Asia     | 0.574 | 163.73 | 39.30  | 124.43 | 92.48  | 7.41  | 85.07  |
| <b>Tanzania</b>            | Sub-Saharan Africa      | 0.411 | 143.21 | 86.63  | 56.57  | 71.52  | 38.73 | 32.79  |
| <b>Thailand</b>            | South & Southeast Asia  | 0.705 | 205.12 | 12.80  | 192.32 | 19.55  | 1.02  | 18.53  |
| <b>The Bahamas</b>         | North & Central America | 0.835 | 125.71 | 3.78   | 121.93 | 65.03  | 0.28  | 64.75  |
| <b>The Gambia</b>          | Sub-Saharan Africa      | 0.327 | 212.34 | 106.09 | 106.26 | 103.27 | 48.78 | 54.49  |
| <b>Timor-Leste</b>         | South & Southeast Asia  | 0.450 | 90.03  | 73.14  | 16.89  | 14.59  | 13.40 | 1.19   |
| <b>Togo</b>                | Sub-Saharan Africa      | 0.362 | 220.62 | 105.78 | 114.84 | 113.01 | 48.13 | 64.88  |
| <b>Tonga</b>               | Oceania                 | 0.622 | 0.00   | 6.78   | 0.00   | 0.00   | 0.94  | 0.00   |
| <b>Trinidad and Tobago</b> | North & Central America | 0.833 | 142.26 | 3.78   | 138.48 | 73.04  | 0.27  | 72.77  |
| <b>Tunisia</b>             | North Africa            | 0.652 | 230.95 | 15.33  | 215.62 | 98.96  | 1.31  | 97.65  |
| <b>Turkey</b>              | West & Central Asia     | 0.690 | 200.99 | 15.07  | 185.91 | 65.65  | 1.36  | 64.29  |
| <b>Turkmenistan</b>        | West & Central Asia     | 0.781 | 266.68 | 4.72   | 261.96 | 147.02 | 0.33  | 146.69 |
| <b>Uganda</b>              | Sub-Saharan Africa      | 0.377 | 156.82 | 87.84  | 68.98  | 79.22  | 39.45 | 39.77  |
| <b>Ukraine</b>             | East Asia               | 0.811 | 41.62  | 4.21   | 37.42  | 29.60  | 0.28  | 29.32  |

|                                             |                         |       |        |       |        |        |       |        |
|---------------------------------------------|-------------------------|-------|--------|-------|--------|--------|-------|--------|
| <b>United Arab Emirates</b>                 | West & Central Asia     | 0.875 | 302.07 | 3.51  | 298.56 | 111.81 | 0.25  | 111.55 |
| <b>United Kingdom</b>                       | Europe                  | 0.893 | 20.75  | 1.64  | 19.12  | 11.97  | 0.12  | 11.85  |
| <b>United States</b>                        | North America           | 0.931 | 37.92  | 1.21  | 36.71  | 9.52   | 0.10  | 9.42   |
| <b>Uruguay</b>                              | South America           | 0.745 | 48.80  | 6.96  | 41.84  | 19.73  | 0.54  | 19.19  |
| <b>Uzbekistan</b>                           | West & Central Asia     | 0.699 | 201.97 | 14.47 | 187.50 | 112.81 | 1.15  | 111.65 |
| <b>Vanuatu</b>                              | Oceania                 | 0.536 | 80.50  | 38.48 | 42.02  | 13.48  | 5.46  | 8.03   |
| <b>Venezuela</b>                            | South America           | 0.728 | 269.20 | 8.85  | 260.34 | 130.43 | 0.55  | 129.87 |
| <b>Vietnam</b>                              | South & Southeast Asia  | 0.628 | 171.04 | 23.48 | 147.56 | 22.06  | 2.38  | 19.68  |
| <b>Virgin Islands, U.S.</b>                 | North & Central America | 0.886 | 128.74 | 2.48  | 126.26 | 62.83  | 0.16  | 62.67  |
| <b>Yemen</b>                                | West & Central Asia     | 0.408 | 327.43 | 88.39 | 239.04 | 129.35 | 40.08 | 89.27  |
| <b>Zambia</b>                               | Sub-Saharan Africa      | 0.467 | 181.28 | 69.00 | 112.28 | 93.25  | 20.79 | 72.46  |
| <b>Zimbabwe</b>                             | Sub-Saharan Africa      | 0.538 | 278.23 | 41.15 | 237.08 | 131.89 | 7.97  | 123.92 |
| <b>DALYs are age adjusted</b>               |                         |       |        |       |        |        |       |        |
| <b>DALY, Disability adjusted life years</b> |                         |       |        |       |        |        |       |        |

**Supplemental Table 4:** Attributable burden of disease (ABD) and disability adjusted life years (DALY) using the World Health Organization recommended level of PM<sub>2.5</sub> as the theoretical minimum risk exposure level (TMREL), 10 ug/m<sup>3</sup>

| Location                   | ABD (in 1000s)                   | ABD (per 100,000)      | Age Standardized ABD (per 100,000) | DALY (in 1000s)                   | DALY (per 100,000)      | Age Standardized DALY (per 100,000) |
|----------------------------|----------------------------------|------------------------|------------------------------------|-----------------------------------|-------------------------|-------------------------------------|
| <b>Global</b>              | 5,005.39<br>(3,626.87, 6,397.35) | 67.91 (49.20, 86.79)   | 73.20 (53.22, 93.42)               | 8,257.98<br>(6,012.93, 10,386.32) | 112.03 (81.57, 140.91)  | 118.28 (86.27, 148.54)              |
| <b>Afghanistan</b>         | 21.98 (15.96, 28.25)             | 67.40 (48.93, 86.65)   | 138.11 (99.80, 180.11)             | 69.58 (45.30, 97.15)              | 213.40 (138.94, 297.93) | 443.96 (293.57, 623.12)             |
| <b>Albania</b>             | 0.97 (0.69, 1.27)                | 33.42 (23.74, 43.70)   | 27.22 (19.45, 35.35)               | 1.60 (1.13, 2.09)                 | 55.15 (38.92, 72.17)    | 47.21 (33.37, 61.57)                |
| <b>Algeria</b>             | 33.44 (24.06, 42.68)             | 84.36 (60.70, 107.69)  | 106.95 (77.07, 137.86)             | 51.11 (36.52, 66.58)              | 128.96 (92.13, 167.99)  | 169.14 (121.26, 219.48)             |
| <b>American Samoa</b>      | 0.00 (0.00, 0.00)                | 0.00 (0.00, 0.00)      | 0.00 (0.00, 0.00)                  | 0.00 (0.00, 0.00)                 | 0.00 (0.00, 0.00)       | 0.00 (0.00, 0.00)                   |
| <b>Andorra</b>             | 0.00 (0.00, 0.00)                | 0.00 (0.00, 0.00)      | 0.00 (0.00, 0.00)                  | 0.00 (0.00, 0.00)                 | 0.00 (0.00, 0.00)       | 0.00 (0.00, 0.00)                   |
| <b>Angola</b>              | 13.40 (9.76, 17.23)              | 53.08 (38.63, 68.25)   | 120.74 (86.10, 155.91)             | 12.85 (8.85, 17.55)               | 50.88 (35.05, 69.51)    | 109.31 (74.01, 149.93)              |
| <b>Antigua and Barbuda</b> | 0.02 (0.01, 0.02)                | 18.25 (12.86, 23.96)   | 19.86 (13.92, 26.35)               | 0.04 (0.03, 0.05)                 | 40.12 (28.25, 52.78)    | 41.98 (29.34, 54.91)                |
| <b>Argentina</b>           | 9.26 (6.50, 12.17)               | 21.34 (14.98, 28.04)   | 19.88 (13.97, 26.21)               | 15.01 (10.73, 19.32)              | 34.57 (24.71, 44.51)    | 32.39 (23.02, 41.95)                |
| <b>Armenia</b>             | 3.61 (2.56, 4.77)                | 120.03 (85.19, 158.46) | 102.64 (72.84, 133.45)             | 2.93 (2.11, 3.81)                 | 97.44 (70.00, 126.56)   | 83.33 (59.56, 108.46)               |
| <b>Australia</b>           | 0.00 (0.00, 0.00)                | 0.00 (0.00, 0.00)      | 0.00 (0.00, 0.00)                  | 0.00 (0.00, 0.00)                 | 0.00 (0.00, 0.00)       | 0.00 (0.00, 0.00)                   |
| <b>Austria</b>             | 4.85 (3.43, 6.31)                | 55.93 (39.60, 72.76)   | 31.54 (22.45, 41.10)               | 4.71 (3.40, 6.07)                 | 54.29 (39.23, 70.02)    | 30.12 (21.69, 38.70)                |
| <b>Azerbaijan</b>          | 9.81 (6.97, 12.84)               | 100.33 (71.22, 131.27) | 116.91 (82.78, 152.33)             | 11.22 (8.02, 14.72)               | 114.68 (82.00, 150.53)  | 125.34 (89.22, 163.91)              |
| <b>Bahrain</b>             | 0.85 (0.61, 1.10)                | 62.24 (44.93, 80.26)   | 96.84 (69.69, 124.03)              | 1.26 (0.88, 1.69)                 | 92.33 (64.18, 123.36)   | 168.77 (117.82, 225.26)             |
| <b>Bangladesh</b>          | 98.37 (71.45, 125.09)            | 61.12 (44.39, 77.72)   | 87.57 (62.83, 112.10)              | 158.40 (114.47, 204.64)           | 98.41 (71.12, 127.14)   | 131.92 (94.99, 170.95)              |

|                                 |                      |                        |                         |                      |                         |                         |
|---------------------------------|----------------------|------------------------|-------------------------|----------------------|-------------------------|-------------------------|
| <b>Barbados</b>                 | 0.10 (0.07, 0.13)    | 35.78 (25.28, 46.74)   | 26.04 (18.44, 33.95)    | 0.18 (0.13, 0.24)    | 64.56 (45.97, 83.78)    | 49.10 (34.89, 63.86)    |
| <b>Belarus</b>                  | 7.57 (5.29, 9.98)    | 78.75 (55.08, 103.81)  | 55.79 (39.35, 73.08)    | 3.95 (2.74, 5.27)    | 41.05 (28.52, 54.86)    | 30.35 (21.12, 40.37)    |
| <b>Belgium</b>                  | 4.37 (3.08, 5.73)    | 38.59 (27.21, 50.55)   | 22.33 (15.79, 29.14)    | 3.69 (2.63, 4.80)    | 32.59 (23.21, 42.36)    | 18.29 (13.00, 23.90)    |
| <b>Belize</b>                   | 0.18 (0.13, 0.23)    | 50.23 (36.31, 63.77)   | 86.32 (62.21, 111.02)   | 0.57 (0.41, 0.75)    | 160.19 (114.86, 207.71) | 256.89 (184.83, 332.08) |
| <b>Benin</b>                    | 9.38 (6.80, 12.07)   | 85.96 (62.33, 110.56)  | 159.79 (114.64, 207.00) | 11.67 (8.11, 15.70)  | 106.93 (74.32, 143.83)  | 183.62 (129.07, 243.93) |
| <b>Bermuda</b>                  | 0.00 (0.00, 0.00)    | 0.00 (0.00, 0.00)      | 0.00 (0.00, 0.00)       | 0.00 (0.00, 0.00)    | 0.00 (0.00, 0.00)       | 0.00 (0.00, 0.00)       |
| <b>Bhutan</b>                   | 0.46 (0.33, 0.58)    | 58.76 (42.60, 75.28)   | 84.66 (60.91, 109.00)   | 0.90 (0.61, 1.24)    | 116.56 (79.10, 159.41)  | 158.91 (108.55, 216.91) |
| <b>Bolivia</b>                  | 5.67 (4.12, 7.28)    | 52.70 (38.23, 67.63)   | 74.72 (54.09, 96.00)    | 18.26 (12.50, 24.63) | 169.63 (116.14, 228.76) | 227.62 (155.42, 310.03) |
| <b>Bosnia and Herzegovina</b>   | 2.50 (1.79, 3.21)    | 65.48 (47.09, 84.18)   | 44.13 (31.82, 56.59)    | 4.03 (2.91, 5.24)    | 105.76 (76.41, 137.56)  | 72.12 (51.59, 93.10)    |
| <b>Botswana</b>                 | 1.06 (0.75, 1.39)    | 46.83 (33.14, 61.51)   | 73.00 (51.63, 96.64)    | 1.06 (0.62, 1.59)    | 47.03 (27.49, 70.30)    | 78.14 (47.97, 116.14)   |
| <b>Brazil</b>                   | 11.82 (8.27, 15.56)  | 5.69 (3.98, 7.49)      | 6.28 (4.38, 8.28)       | 21.40 (15.16, 27.64) | 10.29 (7.29, 13.30)     | 11.12 (7.90, 14.42)     |
| <b>Brunei</b>                   | 0.00 (0.00, 0.00)    | 0.00 (0.00, 0.00)      | 0.00 (0.00, 0.00)       | 0.00 (0.00, 0.00)    | 0.00 (0.00, 0.00)       | 0.00 (0.00, 0.00)       |
| <b>Bulgaria</b>                 | 5.52 (3.95, 7.11)    | 75.88 (54.41, 97.79)   | 45.06 (32.67, 57.89)    | 8.81 (6.34, 11.43)   | 121.20 (87.24, 157.30)  | 76.38 (54.70, 99.19)    |
| <b>Burkina Faso</b>             | 13.01 (9.43, 16.64)  | 71.90 (52.12, 91.96)   | 149.63 (107.38, 193.44) | 12.94 (9.24, 16.87)  | 71.52 (51.08, 93.26)    | 137.35 (98.15, 179.85)  |
| <b>Burundi</b>                  | 6.96 (5.07, 8.91)    | 61.85 (45.11, 79.18)   | 128.03 (91.78, 164.95)  | 6.30 (4.42, 8.37)    | 55.98 (39.28, 74.45)    | 107.48 (75.07, 142.14)  |
| <b>Cambodia</b>                 | 4.16 (3.02, 5.31)    | 26.71 (19.37, 34.06)   | 41.02 (29.77, 52.49)    | 14.80 (10.67, 18.98) | 94.90 (68.44, 121.73)   | 139.82 (101.39, 178.67) |
| <b>Cameroon</b>                 | 17.44 (12.61, 22.31) | 74.53 (53.88, 95.36)   | 143.07 (103.50, 184.81) | 27.04 (17.85, 37.94) | 115.54 (76.27, 162.14)  | 183.33 (120.38, 256.90) |
| <b>Canada</b>                   | 0.00 (0.00, 0.00)    | 0.00 (0.00, 0.00)      | 0.00 (0.00, 0.00)       | 0.00 (0.00, 0.00)    | 0.00 (0.00, 0.00)       | 0.00 (0.00, 0.00)       |
| <b>Cape Verde</b>               | 0.54 (0.39, 0.69)    | 103.50 (74.92, 132.79) | 154.92 (110.80, 201.01) | 0.56 (0.40, 0.73)    | 108.20 (77.18, 141.11)  | 151.72 (108.17, 198.88) |
| <b>Central African Republic</b> | 3.44 (2.48, 4.42)    | 70.25 (50.63, 90.14)   | 123.73 (88.66, 158.84)  | 4.13 (2.89, 5.48)    | 84.31 (58.90, 111.85)   | 138.05 (96.19, 184.94)  |

|                                         |                         |                       |                         |                             |                        |                         |
|-----------------------------------------|-------------------------|-----------------------|-------------------------|-----------------------------|------------------------|-------------------------|
| <b>Chad</b>                             | 10.41 (7.56, 13.38)     | 74.04 (53.75, 95.15)  | 158.85 (113.74, 206.67) | 16.20 (11.42, 21.47)        | 115.20 (81.18, 152.68) | 190.06 (135.31, 248.39) |
| <b>Chile</b>                            | 12.89 (9.25, 16.73)     | 71.84 (51.53, 93.21)  | 62.97 (45.14, 81.15)    | 18.32 (12.76, 24.56)        | 102.06 (71.09, 136.84) | 89.44 (62.04, 120.05)   |
| <b>China</b>                            | 553.88 (401.61, 707.76) | 40.04 (29.03, 51.16)  | 35.31 (25.78, 45.01)    | 1,191.53 (869.38, 1,507.32) | 86.13 (62.84, 108.95)  | 76.16 (55.70, 96.10)    |
| <b>Colombia</b>                         | 29.70 (21.14, 38.65)    | 61.53 (43.81, 80.07)  | 70.74 (50.04, 92.03)    | 31.86 (22.71, 41.22)        | 66.02 (47.05, 85.40)   | 77.50 (55.34, 99.33)    |
| <b>Comoros</b>                          | 0.28 (0.20, 0.36)       | 34.97 (24.71, 45.66)  | 64.26 (45.62, 84.21)    | 0.25 (0.16, 0.35)           | 31.08 (20.39, 44.11)   | 56.48 (36.58, 80.01)    |
| <b>Congo</b>                            | 3.23 (2.34, 4.13)       | 69.68 (50.48, 89.33)  | 127.16 (91.21, 164.60)  | 3.06 (2.13, 4.08)           | 66.13 (45.96, 88.08)   | 119.50 (82.10, 160.66)  |
| <b>Costa Rica</b>                       | 4.60 (3.28, 5.97)       | 95.57 (68.20, 124.19) | 95.69 (68.57, 124.55)   | 5.61 (4.08, 7.14)           | 116.74 (84.78, 148.57) | 116.74 (84.28, 149.09)  |
| <b>Cote d'Ivoire</b>                    | 18.05 (12.96, 23.36)    | 79.57 (57.13, 102.95) | 143.36 (102.49, 187.33) | 24.96 (17.20, 33.69)        | 110.03 (75.81, 148.48) | 181.06 (124.07, 243.27) |
| <b>Croatia</b>                          | 2.88 (2.06, 3.72)       | 68.01 (48.54, 87.70)  | 40.27 (28.97, 51.94)    | 3.51 (2.52, 4.53)           | 82.84 (59.40, 106.76)  | 48.45 (34.93, 62.01)    |
| <b>Cuba</b>                             | 4.78 (3.39, 6.18)       | 41.93 (29.79, 54.28)  | 30.59 (21.70, 39.78)    | 7.55 (5.40, 9.69)           | 66.31 (47.44, 85.09)   | 49.26 (35.37, 63.36)    |
| <b>Cyprus</b>                           | 0.46 (0.32, 0.60)       | 51.51 (36.41, 67.08)  | 38.19 (26.83, 49.92)    | 0.59 (0.43, 0.76)           | 66.36 (47.88, 85.46)   | 48.27 (34.82, 61.71)    |
| <b>Czech Republic</b>                   | 6.38 (4.58, 8.22)       | 59.64 (42.84, 76.82)  | 37.56 (27.33, 48.18)    | 6.86 (4.91, 8.92)           | 64.13 (45.94, 83.43)   | 40.94 (29.44, 53.31)    |
| <b>Democratic Republic of the Congo</b> | 42.90 (31.03, 54.95)    | 55.42 (40.09, 70.98)  | 115.51 (82.91, 149.82)  | 40.74 (29.19, 53.05)        | 52.62 (37.71, 68.52)   | 103.70 (73.69, 135.06)  |
| <b>Denmark</b>                          | 0.30 (0.21, 0.40)       | 5.30 (3.68, 7.08)     | 3.13 (2.19, 4.16)       | 0.25 (0.17, 0.33)           | 4.38 (3.06, 5.77)      | 2.70 (1.89, 3.59)       |
| <b>Djibouti</b>                         | 0.65 (0.47, 0.84)       | 73.08 (52.68, 94.07)  | 121.71 (87.79, 157.11)  | 0.63 (0.43, 0.86)           | 70.67 (48.37, 96.80)   | 114.87 (78.22, 155.63)  |
| <b>Dominica</b>                         | 0.01 (0.01, 0.02)       | 19.08 (13.42, 25.10)  | 19.59 (13.87, 25.78)    | 0.04 (0.03, 0.05)           | 54.29 (38.24, 71.34)   | 55.30 (38.67, 72.77)    |
| <b>Dominican Republic</b>               | 3.94 (2.84, 5.07)       | 37.41 (26.97, 48.16)  | 47.21 (33.77, 60.99)    | 7.83 (5.53, 10.24)          | 74.37 (52.48, 97.27)   | 90.19 (63.68, 118.24)   |
| <b>Ecuador</b>                          | 2.21 (1.55, 2.89)       | 13.66 (9.60, 17.90)   | 17.66 (12.41, 23.19)    | 5.95 (4.24, 7.71)           | 36.80 (26.26, 47.70)   | 46.03 (32.60, 59.49)    |
| <b>Egypt</b>                            | 83.34 (60.45, 106.96)   | 91.43 (66.32, 117.35) | 124.26 (89.93, 159.34)  | 124.12 (84.50, 168.87)      | 136.18 (92.71, 185.27) | 197.49 (132.77, 271.08) |

|                                       |                      |                         |                         |                      |                         |                         |
|---------------------------------------|----------------------|-------------------------|-------------------------|----------------------|-------------------------|-------------------------|
| <b>El Salvador</b>                    | 9.16 (6.68, 11.57)   | 149.33 (108.87, 188.55) | 175.31 (128.04, 221.56) | 21.25 (15.13, 27.55) | 346.20 (246.49, 448.96) | 391.27 (280.15, 508.00) |
| <b>Equatorial Guinea</b>              | 0.63 (0.45, 0.82)    | 74.89 (53.52, 97.57)    | 121.56 (87.18, 157.49)  | 0.46 (0.29, 0.66)    | 53.85 (33.80, 77.55)    | 91.96 (58.70, 132.26)   |
| <b>Eritrea</b>                        | 3.20 (2.32, 4.10)    | 60.96 (44.19, 78.16)    | 125.53 (90.04, 162.49)  | 2.97 (2.04, 4.02)    | 56.73 (38.83, 76.59)    | 112.89 (78.78, 150.20)  |
| <b>Estonia</b>                        | 0.00 (0.00, 0.00)    | 0.00 (0.00, 0.00)       | 0.00 (0.00, 0.00)       | 0.00 (0.00, 0.00)    | 0.00 (0.00, 0.00)       | 0.00 (0.00, 0.00)       |
| <b>Ethiopia</b>                       | 65.83 (47.76, 84.63) | 66.20 (48.03, 85.11)    | 126.18 (90.75, 163.63)  | 67.95 (48.21, 89.90) | 68.34 (48.49, 90.41)    | 128.06 (90.83, 168.68)  |
| <b>Federated States of Micronesia</b> | 0.00 (0.00, 0.00)    | 0.00 (0.00, 0.00)       | 0.00 (0.00, 0.00)       | 0.00 (0.00, 0.00)    | 0.00 (0.00, 0.00)       | 0.00 (0.00, 0.00)       |
| <b>Fiji</b>                           | 0.00 (0.00, 0.00)    | 0.00 (0.00, 0.00)       | 0.00 (0.00, 0.00)       | 0.00 (0.00, 0.00)    | 0.00 (0.00, 0.00)       | 0.00 (0.00, 0.00)       |
| <b>Finland</b>                        | 0.00 (0.00, 0.00)    | 0.00 (0.00, 0.00)       | 0.00 (0.00, 0.00)       | 0.00 (0.00, 0.00)    | 0.00 (0.00, 0.00)       | 0.00 (0.00, 0.00)       |
| <b>France</b>                         | 9.44 (6.60, 12.52)   | 14.47 (10.12, 19.19)    | 8.07 (5.64, 10.60)      | 7.35 (5.18, 9.65)    | 11.27 (7.94, 14.80)     | 6.26 (4.37, 8.27)       |
| <b>Gabon</b>                          | 1.31 (0.95, 1.69)    | 75.97 (54.98, 97.76)    | 121.15 (87.25, 156.37)  | 1.34 (0.91, 1.84)    | 77.89 (52.50, 106.50)   | 121.85 (82.86, 165.77)  |
| <b>Georgia</b>                        | 4.47 (3.19, 5.81)    | 111.52 (79.78, 145.01)  | 88.20 (62.89, 114.83)   | 5.36 (3.85, 6.89)    | 133.91 (96.19, 172.09)  | 108.65 (78.21, 140.28)  |
| <b>Germany</b>                        | 29.62 (20.61, 39.24) | 35.42 (24.65, 46.92)    | 17.56 (12.38, 23.06)    | 28.42 (20.14, 37.19) | 33.99 (24.08, 44.48)    | 16.49 (11.71, 21.42)    |
| <b>Ghana</b>                          | 25.51 (18.34, 32.82) | 93.05 (66.91, 119.69)   | 156.61 (112.61, 203.64) | 27.39 (19.59, 36.02) | 99.90 (71.46, 131.36)   | 157.89 (112.67, 207.44) |
| <b>Greece</b>                         | 3.11 (2.18, 4.13)    | 28.48 (19.96, 37.84)    | 14.59 (10.28, 19.15)    | 3.51 (2.50, 4.57)    | 32.17 (22.86, 41.82)    | 16.17 (11.63, 21.05)    |
| <b>Greenland</b>                      | 0.00 (0.00, 0.00)    | 0.00 (0.00, 0.00)       | 0.00 (0.00, 0.00)       | 0.00 (0.00, 0.00)    | 0.00 (0.00, 0.00)       | 0.00 (0.00, 0.00)       |
| <b>Grenada</b>                        | 0.03 (0.02, 0.04)    | 25.49 (17.93, 33.25)    | 30.60 (21.67, 40.21)    | 0.09 (0.06, 0.11)    | 80.37 (56.68, 105.81)   | 92.92 (65.67, 121.98)   |
| <b>Guam</b>                           | 0.00 (0.00, 0.00)    | 0.00 (0.00, 0.00)       | 0.00 (0.00, 0.00)       | 0.00 (0.00, 0.00)    | 0.00 (0.00, 0.00)       | 0.00 (0.00, 0.00)       |
| <b>Guatemala</b>                      | 14.19 (10.27, 18.18) | 86.74 (62.81, 111.17)   | 151.50 (109.29, 195.59) | 30.82 (21.13, 41.65) | 188.47 (129.22, 254.64) | 293.76 (201.78, 397.48) |
| <b>Guinea</b>                         | 9.01 (6.42, 11.67)   | 71.68 (51.10, 92.78)    | 128.63 (90.70, 167.52)  | 10.01 (6.95, 13.46)  | 79.64 (55.23, 107.06)   | 131.47 (90.77, 176.10)  |
| <b>Guinea-Bissau</b>                  | 1.96 (1.41, 2.53)    | 106.12 (76.38, 136.74)  | 182.42 (132.07, 236.39) | 2.90 (2.04, 3.85)    | 156.81 (110.21, 208.47) | 251.12 (177.70, 334.40) |
| <b>Guyana</b>                         | 0.20 (0.14, 0.27)    | 26.36 (18.68, 34.60)    | 33.86 (24.13, 44.31)    | 0.60 (0.42, 0.78)    | 77.31 (55.14, 101.13)   | 94.06 (66.81, 122.08)   |

|                   |                           |                       |                         |                               |                         |                         |
|-------------------|---------------------------|-----------------------|-------------------------|-------------------------------|-------------------------|-------------------------|
| <b>Haiti</b>      | 5.35 (3.85, 6.80)         | 49.87 (35.93, 63.45)  | 81.26 (58.71, 104.11)   | 18.01 (11.79, 25.27)          | 167.94 (109.94, 235.67) | 242.70 (158.09, 335.78) |
| <b>Honduras</b>   | 7.05 (5.07, 9.13)         | 87.06 (62.61, 112.78) | 144.71 (103.71, 188.55) | 15.72 (10.16, 22.23)          | 194.17 (125.47, 274.60) | 309.35 (199.62, 431.69) |
| <b>Hungary</b>    | 7.19 (5.18, 9.27)         | 70.71 (50.99, 91.17)  | 43.77 (31.75, 56.07)    | 8.48 (6.16, 10.87)            | 83.42 (60.59, 106.92)   | 52.83 (38.17, 67.50)    |
| <b>Iceland</b>    | 0.00 (0.00, 0.00)         | 0.00 (0.00, 0.00)     | 0.00 (0.00, 0.00)       | 0.00 (0.00, 0.00)             | 0.00 (0.00, 0.00)       | 0.00 (0.00, 0.00)       |
| <b>India</b>      | 786.55 (568.75, 1,006.63) | 59.97 (43.36, 76.75)  | 77.91 (56.46, 99.99)    | 1,801.84 (1,309.50, 2,298.82) | 137.37 (99.84, 175.26)  | 171.90 (125.02, 217.84) |
| <b>Indonesia</b>  | 38.10 (26.91, 49.38)      | 14.79 (10.45, 19.17)  | 18.54 (13.14, 23.97)    | 131.65 (94.36, 168.66)        | 51.10 (36.63, 65.47)    | 60.56 (43.44, 77.50)    |
| <b>Iran</b>       | 65.60 (47.37, 84.25)      | 83.01 (59.94, 106.60) | 107.31 (77.53, 138.37)  | 75.07 (53.25, 98.71)          | 94.98 (67.37, 124.89)   | 127.28 (90.41, 167.32)  |
| <b>Iraq</b>       | 25.02 (18.15, 32.10)      | 68.69 (49.84, 88.14)  | 135.49 (97.84, 174.11)  | 54.04 (36.71, 74.16)          | 148.38 (100.80, 203.61) | 302.27 (208.95, 407.86) |
| <b>Ireland</b>    | 0.00 (0.00, 0.00)         | 0.00 (0.00, 0.00)     | 0.00 (0.00, 0.00)       | 0.00 (0.00, 0.00)             | 0.00 (0.00, 0.00)       | 0.00 (0.00, 0.00)       |
| <b>Israel</b>     | 5.39 (3.86, 6.92)         | 66.96 (48.01, 85.94)  | 60.56 (43.99, 78.24)    | 7.77 (5.56, 10.12)            | 96.58 (69.04, 125.79)   | 85.70 (60.78, 112.41)   |
| <b>Italy</b>      | 48.18 (34.38, 62.54)      | 76.73 (54.75, 99.59)  | 37.35 (26.87, 48.50)    | 42.12 (30.31, 54.13)          | 67.07 (48.27, 86.20)    | 32.10 (23.13, 41.26)    |
| <b>Jamaica</b>    | 1.15 (0.82, 1.49)         | 40.59 (28.99, 52.60)  | 42.96 (30.55, 56.17)    | 2.81 (1.84, 3.93)             | 99.18 (65.01, 138.75)   | 103.55 (68.49, 144.47)  |
| <b>Japan</b>      | 50.38 (35.22, 66.88)      | 39.26 (27.45, 52.12)  | 16.75 (11.79, 21.90)    | 48.57 (34.25, 63.35)          | 37.85 (26.69, 49.37)    | 16.88 (11.94, 22.17)    |
| <b>Jordan</b>     | 5.00 (3.65, 6.43)         | 66.07 (48.16, 84.91)  | 113.96 (81.78, 147.50)  | 8.90 (6.09, 12.15)            | 117.52 (80.39, 160.47)  | 212.61 (146.56, 288.57) |
| <b>Kazakhstan</b> | 11.04 (7.85, 14.44)       | 62.98 (44.78, 82.36)  | 73.34 (52.15, 96.31)    | 10.16 (7.12, 13.50)           | 57.96 (40.60, 76.99)    | 65.03 (45.58, 86.68)    |
| <b>Kenya</b>      | 12.04 (8.51, 15.61)       | 26.06 (18.42, 33.80)  | 52.29 (36.88, 68.52)    | 8.57 (5.98, 11.45)            | 18.56 (12.95, 24.78)    | 35.82 (24.74, 48.42)    |
| <b>Kiribati</b>   | 0.00 (0.00, 0.00)         | 0.00 (0.00, 0.00)     | 0.00 (0.00, 0.00)       | 0.00 (0.00, 0.00)             | 0.00 (0.00, 0.00)       | 0.00 (0.00, 0.00)       |
| <b>Kuwait</b>     | 2.16 (1.54, 2.77)         | 55.27 (39.61, 71.00)  | 92.57 (67.03, 119.14)   | 2.26 (1.56, 3.02)             | 57.88 (40.11, 77.39)    | 114.27 (79.77, 152.45)  |
| <b>Kyrgyzstan</b> | 2.30 (1.63, 3.02)         | 38.97 (27.61, 51.20)  | 56.95 (39.97, 74.65)    | 3.05 (2.17, 3.95)             | 51.78 (36.88, 67.08)    | 64.33 (46.01, 83.27)    |
| <b>Laos</b>       | 1.87 (1.36, 2.38)         | 27.48 (19.97, 34.94)  | 46.84 (33.91, 59.47)    | 8.64 (6.14, 11.33)            | 127.05 (90.36, 166.61)  | 188.65 (136.73, 243.39) |



|                         |                        |                        |                         |                         |                         |                         |
|-------------------------|------------------------|------------------------|-------------------------|-------------------------|-------------------------|-------------------------|
| <b>Latvia</b>           | 2.82 (2.00, 3.69)      | 127.37 (90.52, 166.94) | 76.37 (54.21, 99.86)    | 1.59 (1.13, 2.10)       | 72.01 (51.09, 95.01)    | 44.92 (31.99, 58.53)    |
| <b>Lebanon</b>          | 4.35 (3.14, 5.57)      | 75.56 (54.56, 96.66)   | 80.84 (58.27, 104.12)   | 4.34 (3.10, 5.66)       | 75.29 (53.74, 98.22)    | 81.72 (58.13, 106.46)   |
| <b>Lesotho</b>          | 1.52 (1.08, 1.97)      | 71.32 (50.71, 92.39)   | 124.48 (88.50, 163.40)  | 2.02 (1.35, 2.79)       | 94.71 (63.63, 131.22)   | 168.86 (114.18, 232.64) |
| <b>Liberia</b>          | 0.00 (0.00, 0.00)      | 0.00 (0.00, 0.00)      | 0.00 (0.00, 0.00)       | 0.00 (0.00, 0.00)       | 0.00 (0.00, 0.00)       | 0.00 (0.00, 0.00)       |
| <b>Libya</b>            | 4.97 (3.60, 6.36)      | 78.96 (57.12, 101.11)  | 107.90 (77.77, 138.57)  | 9.35 (6.51, 12.51)      | 148.56 (103.41, 198.70) | 219.10 (154.40, 293.34) |
| <b>Lithuania</b>        | 3.17 (2.25, 4.16)      | 100.50 (71.27, 131.87) | 61.75 (44.36, 80.35)    | 1.67 (1.17, 2.23)       | 53.11 (37.22, 70.70)    | 33.53 (23.72, 43.97)    |
| <b>Luxembourg</b>       | 0.20 (0.14, 0.27)      | 36.48 (25.60, 47.68)   | 25.89 (18.32, 33.77)    | 0.17 (0.12, 0.22)       | 31.13 (22.16, 40.37)    | 21.52 (15.28, 28.16)    |
| <b>Macedonia</b>        | 1.15 (0.82, 1.47)      | 55.16 (39.59, 70.95)   | 43.45 (31.41, 55.52)    | 2.25 (1.63, 2.88)       | 108.28 (78.60, 138.39)  | 86.14 (62.08, 109.72)   |
| <b>Madagascar</b>       | 10.33 (7.37, 13.37)    | 42.71 (30.47, 55.26)   | 82.75 (58.53, 108.21)   | 9.17 (6.33, 12.41)      | 37.91 (26.16, 51.30)    | 68.59 (47.60, 92.21)    |
| <b>Malawi</b>           | 8.78 (6.36, 11.29)     | 51.01 (36.95, 65.57)   | 109.83 (79.39, 142.95)  | 9.17 (6.36, 12.27)      | 53.26 (36.96, 71.30)    | 103.32 (72.48, 137.05)  |
| <b>Malaysia</b>         | 4.70 (3.35, 6.11)      | 15.51 (11.04, 20.18)   | 19.16 (13.48, 25.04)    | 11.27 (7.98, 14.63)     | 37.21 (26.33, 48.30)    | 47.69 (33.89, 61.68)    |
| <b>Maldives</b>         | 0.12 (0.08, 0.15)      | 32.02 (23.23, 40.83)   | 46.86 (34.02, 59.57)    | 0.41 (0.28, 0.56)       | 112.83 (77.79, 153.36)  | 171.15 (118.28, 230.15) |
| <b>Mali</b>             | 12.89 (9.34, 16.49)    | 73.36 (53.18, 93.87)   | 154.93 (111.18, 200.53) | 16.38 (11.46, 21.95)    | 93.23 (65.24, 124.95)   | 162.02 (113.44, 216.44) |
| <b>Malta</b>            | 0.18 (0.13, 0.24)      | 43.10 (30.52, 56.82)   | 24.96 (17.55, 32.76)    | 0.17 (0.12, 0.23)       | 41.64 (29.26, 55.28)    | 25.80 (17.98, 34.14)    |
| <b>Marshall Islands</b> | 0.00 (0.00, 0.00)      | 0.00 (0.00, 0.00)      | 0.00 (0.00, 0.00)       | 0.00 (0.00, 0.00)       | 0.00 (0.00, 0.00)       | 0.00 (0.00, 0.00)       |
| <b>Mauritania</b>       | 3.88 (2.79, 4.97)      | 94.91 (68.35, 121.77)  | 159.22 (114.17, 206.63) | 3.82 (2.63, 5.17)       | 93.62 (64.47, 126.47)   | 155.47 (107.46, 210.16) |
| <b>Mauritius</b>        | 0.44 (0.31, 0.57)      | 34.29 (24.08, 44.80)   | 29.81 (21.18, 38.80)    | 2.11 (1.49, 2.78)       | 165.84 (116.67, 218.42) | 145.74 (102.55, 193.09) |
| <b>Mexico</b>           | 137.61 (98.68, 177.83) | 108.32 (77.68, 139.97) | 137.61 (98.41, 178.80)  | 311.56 (227.46, 390.77) | 245.24 (179.04, 307.59) | 304.03 (221.95, 382.61) |
| <b>Moldova</b>          | 2.28 (1.60, 3.01)      | 56.13 (39.41, 74.09)   | 46.86 (33.49, 61.85)    | 1.35 (0.94, 1.78)       | 33.20 (23.16, 43.73)    | 28.60 (19.85, 38.17)    |
| <b>Mongolia</b>         | 2.54 (1.83, 3.29)      | 86.13 (61.84, 111.34)  | 131.02 (93.69, 170.41)  | 3.88 (2.19, 5.85)       | 131.22 (74.00, 198.03)  | 167.71 (103.81, 242.85) |

|                                 |                         |                        |                         |                         |                         |                         |
|---------------------------------|-------------------------|------------------------|-------------------------|-------------------------|-------------------------|-------------------------|
| <b>Montenegro</b>               | 0.41 (0.30, 0.53)       | 65.58 (47.33, 85.01)   | 49.22 (35.54, 63.15)    | 0.67 (0.49, 0.86)       | 107.57 (77.94, 138.06)  | 82.39 (59.82, 105.73)   |
| <b>Morocco</b>                  | 20.70 (15.05, 26.64)    | 60.22 (43.80, 77.49)   | 69.93 (50.31, 89.65)    | 54.19 (37.34, 73.07)    | 157.65 (108.63, 212.57) | 190.76 (131.21, 259.15) |
| <b>Mozambique</b>               | 10.63 (7.60, 13.83)     | 37.98 (27.16, 49.42)   | 76.22 (53.75, 99.50)    | 10.55 (6.83, 15.07)     | 37.71 (24.40, 53.83)    | 68.74 (44.97, 97.91)    |
| <b>Myanmar</b>                  | 20.52 (14.77, 26.34)    | 37.99 (27.34, 48.75)   | 47.49 (34.25, 60.68)    | 72.10 (51.34, 94.80)    | 133.45 (95.03, 175.48)  | 164.59 (118.35, 214.89) |
| <b>Namibia</b>                  | 1.34 (0.96, 1.74)       | 54.66 (39.03, 70.75)   | 94.50 (67.32, 123.60)   | 1.39 (0.91, 1.94)       | 56.77 (37.20, 79.14)    | 103.18 (67.97, 143.38)  |
| <b>Nepal</b>                    | 23.84 (17.27, 30.59)    | 83.50 (60.48, 107.15)  | 117.84 (84.33, 151.74)  | 34.01 (23.35, 45.63)    | 119.11 (81.80, 159.80)  | 172.09 (120.09, 228.43) |
| <b>Netherlands</b>              | 4.44 (3.12, 5.86)       | 25.83 (18.12, 34.11)   | 15.41 (10.85, 20.24)    | 3.84 (2.72, 5.01)       | 22.33 (15.83, 29.12)    | 13.49 (9.58, 17.64)     |
| <b>New Zealand</b>              | 0.00 (0.00, 0.00)       | 0.00 (0.00, 0.00)      | 0.00 (0.00, 0.00)       | 0.00 (0.00, 0.00)       | 0.00 (0.00, 0.00)       | 0.00 (0.00, 0.00)       |
| <b>Nicaragua</b>                | 6.33 (4.58, 8.19)       | 103.91 (75.25, 134.55) | 153.27 (110.22, 197.22) | 15.77 (11.07, 20.94)    | 259.01 (181.79, 344.00) | 350.66 (246.24, 461.78) |
| <b>Niger</b>                    | 15.10 (10.88, 19.41)    | 76.04 (54.79, 97.75)   | 155.10 (112.04, 201.47) | 18.99 (12.68, 26.34)    | 95.67 (63.84, 132.66)   | 165.85 (113.37, 227.06) |
| <b>Nigeria</b>                  | 140.66 (101.70, 180.23) | 77.08 (55.73, 98.76)   | 144.52 (103.59, 187.08) | 85.68 (59.86, 115.45)   | 46.95 (32.80, 63.26)    | 84.71 (58.31, 114.01)   |
| <b>North Korea</b>              | 10.91 (7.86, 14.14)     | 43.38 (31.24, 56.20)   | 44.22 (32.10, 56.62)    | 27.94 (20.06, 36.08)    | 111.07 (79.75, 143.39)  | 110.68 (79.45, 144.03)  |
| <b>Northern Mariana Islands</b> | 0.00 (0.00, 0.01)       | 4.06 (2.84, 5.36)      | 9.45 (6.67, 12.47)      | 0.02 (0.01, 0.02)       | 13.91 (9.36, 19.18)     | 30.01 (20.76, 40.37)    |
| <b>Norway</b>                   | 0.00 (0.00, 0.00)       | 0.00 (0.00, 0.00)      | 0.00 (0.00, 0.00)       | 0.00 (0.00, 0.00)       | 0.00 (0.00, 0.00)       | 0.00 (0.00, 0.00)       |
| <b>Oman</b>                     | 2.41 (1.75, 3.08)       | 53.87 (39.12, 68.73)   | 94.72 (68.30, 122.31)   | 3.11 (2.22, 4.05)       | 69.45 (49.56, 90.32)    | 133.13 (95.31, 171.44)  |
| <b>Pakistan</b>                 | 77.51 (56.63, 98.27)    | 41.00 (29.95, 51.98)   | 64.30 (46.68, 82.05)    | 246.12 (153.64, 353.37) | 130.18 (81.26, 186.91)  | 182.73 (113.75, 263.58) |
| <b>Palestine</b>                | 2.59 (1.87, 3.32)       | 55.46 (40.08, 71.09)   | 112.01 (80.08, 144.76)  | 5.58 (4.03, 7.13)       | 119.35 (86.24, 152.53)  | 264.79 (192.26, 339.14) |
| <b>Panama</b>                   | 0.96 (0.67, 1.28)       | 24.48 (17.14, 32.48)   | 28.53 (19.86, 37.87)    | 1.33 (0.94, 1.75)       | 33.98 (23.99, 44.65)    | 38.22 (26.76, 50.29)    |
| <b>Papua New Guinea</b>         | 0.13 (0.09, 0.17)       | 1.69 (1.19, 2.23)      | 3.03 (2.11, 4.00)       | 0.60 (0.36, 0.89)       | 7.82 (4.72, 11.70)      | 13.11 (8.02, 19.50)     |
| <b>Paraguay</b>                 | 1.33 (0.94, 1.73)       | 19.95 (14.11, 26.01)   | 27.91 (19.62, 36.66)    | 3.80 (2.69, 4.98)       | 57.05 (40.38, 74.85)    | 77.87 (55.16, 101.70)   |

|                                         |                       |                       |                         |                         |                         |                         |
|-----------------------------------------|-----------------------|-----------------------|-------------------------|-------------------------|-------------------------|-------------------------|
| <b>Peru</b>                             | 13.94 (10.11, 17.78)  | 44.40 (32.21, 56.62)  | 57.34 (41.46, 73.89)    | 29.10 (20.36, 38.58)    | 92.68 (64.86, 122.89)   | 115.33 (80.52, 152.93)  |
| <b>Philippines</b>                      | 38.96 (28.35, 49.52)  | 38.65 (28.12, 49.12)  | 53.88 (38.80, 68.32)    | 207.35 (148.93, 267.93) | 205.70 (147.75, 265.80) | 284.53 (205.31, 366.11) |
| <b>Poland</b>                           | 29.14 (20.79, 37.60)  | 74.90 (53.42, 96.62)  | 50.77 (36.67, 65.26)    | 29.47 (21.27, 37.75)    | 75.73 (54.66, 97.00)    | 51.37 (37.25, 66.05)    |
| <b>Portugal</b>                         | 0.00 (0.00, 0.00)     | 0.00 (0.00, 0.00)     | 0.00 (0.00, 0.00)       | 0.00 (0.00, 0.00)       | 0.00 (0.00, 0.00)       | 0.00 (0.00, 0.00)       |
| <b>Puerto Rico</b>                      | 2.14 (1.52, 2.79)     | 58.02 (41.36, 75.61)  | 43.71 (31.05, 56.69)    | 4.03 (2.90, 5.19)       | 109.42 (78.65, 140.83)  | 83.18 (59.51, 107.10)   |
| <b>Qatar</b>                            | 1.05 (0.76, 1.35)     | 47.36 (34.13, 60.94)  | 92.76 (66.44, 119.08)   | 1.25 (0.84, 1.70)       | 56.17 (37.79, 76.58)    | 129.54 (86.48, 179.64)  |
| <b>Romania</b>                          | 10.38 (7.47, 13.32)   | 53.14 (38.23, 68.24)  | 34.01 (24.55, 43.74)    | 13.72 (9.93, 17.66)     | 70.27 (50.87, 90.43)    | 45.55 (32.81, 58.52)    |
| <b>Russia</b>                           | 91.33 (64.40, 119.39) | 61.66 (43.48, 80.61)  | 44.39 (31.27, 58.14)    | 53.41 (35.80, 73.06)    | 36.06 (24.17, 49.33)    | 27.36 (18.33, 37.88)    |
| <b>Rwanda</b>                           | 6.27 (4.53, 8.07)     | 53.89 (38.92, 69.35)  | 109.18 (78.76, 140.88)  | 5.29 (3.56, 7.31)       | 45.47 (30.60, 62.83)    | 87.10 (58.68, 121.25)   |
| <b>Saint Lucia</b>                      | 0.04 (0.03, 0.05)     | 21.49 (15.19, 28.00)  | 21.57 (15.15, 28.46)    | 0.09 (0.06, 0.12)       | 48.42 (34.63, 62.48)    | 47.38 (33.62, 61.13)    |
| <b>Saint Vincent and the Grenadines</b> | 0.02 (0.02, 0.03)     | 20.66 (14.57, 27.12)  | 22.97 (16.13, 30.12)    | 0.06 (0.04, 0.08)       | 55.11 (39.35, 71.07)    | 59.25 (41.87, 76.15)    |
| <b>Samoa</b>                            | 0.00 (0.00, 0.00)     | 0.00 (0.00, 0.00)     | 0.00 (0.00, 0.00)       | 0.00 (0.00, 0.00)       | 0.00 (0.00, 0.00)       | 0.00 (0.00, 0.00)       |
| <b>Sao Tome and Principe</b>            | 0.05 (0.04, 0.07)     | 26.60 (18.89, 34.87)  | 50.12 (35.12, 66.25)    | 0.07 (0.05, 0.10)       | 38.84 (25.99, 53.11)    | 67.04 (46.10, 90.33)    |
| <b>Saudi Arabia</b>                     | 22.09 (15.99, 28.43)  | 70.27 (50.87, 90.43)  | 108.54 (78.59, 139.62)  | 34.11 (24.78, 43.85)    | 108.52 (78.82, 139.49)  | 209.54 (151.98, 266.42) |
| <b>Senegal</b>                          | 13.18 (9.55, 16.84)   | 87.26 (63.22, 111.46) | 166.93 (120.36, 217.81) | 17.26 (12.44, 22.29)    | 114.26 (82.33, 147.51)  | 201.83 (145.14, 260.94) |
| <b>Serbia</b>                           | 4.81 (3.45, 6.24)     | 54.29 (38.97, 70.48)  | 35.27 (25.45, 45.43)    | 9.68 (6.97, 12.39)      | 109.25 (78.66, 139.85)  | 71.38 (51.90, 90.78)    |
| <b>Seychelles</b>                       | 0.01 (0.01, 0.01)     | 11.12 (7.97, 14.61)   | 11.66 (8.24, 15.24)     | 0.06 (0.04, 0.08)       | 59.67 (41.69, 79.71)    | 62.47 (43.54, 82.95)    |
| <b>Sierra Leone</b>                     | 2.58 (1.83, 3.40)     | 39.98 (28.37, 52.56)  | 74.47 (52.46, 97.62)    | 3.38 (2.30, 4.63)       | 52.37 (35.60, 71.61)    | 85.72 (58.82, 115.97)   |
| <b>Singapore</b>                        | 1.80 (1.28, 2.34)     | 45.85 (32.63, 59.56)  | 36.70 (26.06, 47.70)    | 2.69 (1.89, 3.58)       | 68.68 (48.27, 91.14)    | 55.46 (38.80, 73.16)    |
| <b>Slovakia</b>                         | 2.94 (2.12, 3.82)     | 52.97 (38.07, 68.79)  | 38.25 (27.64, 49.43)    | 3.89 (2.80, 5.05)       | 70.00 (50.40, 90.88)    | 51.09 (36.21, 66.20)    |

|                        |                      |                        |                         |                        |                         |                         |
|------------------------|----------------------|------------------------|-------------------------|------------------------|-------------------------|-------------------------|
| <b>Slovenia</b>        | 1.06 (0.76, 1.37)    | 51.45 (36.91, 66.55)   | 30.77 (22.06, 39.69)    | 1.01 (0.72, 1.32)      | 48.94 (34.96, 63.93)    | 28.16 (19.93, 36.75)    |
| <b>Solomon Islands</b> | 0.00 (0.00, 0.00)    | 0.00 (0.00, 0.00)      | 0.00 (0.00, 0.00)       | 0.00 (0.00, 0.00)      | 0.00 (0.00, 0.00)       | 0.00 (0.00, 0.00)       |
| <b>Somalia</b>         | 4.23 (3.02, 5.51)    | 38.98 (27.81, 50.83)   | 76.87 (54.43, 100.26)   | 4.89 (3.37, 6.60)      | 45.07 (31.02, 60.81)    | 84.75 (58.59, 114.52)   |
| <b>South Africa</b>    | 60.27 (43.43, 77.00) | 112.19 (80.84, 143.33) | 146.54 (105.05, 187.65) | 78.29 (56.93, 99.75)   | 145.72 (105.98, 185.67) | 186.86 (135.89, 237.91) |
| <b>South Korea</b>     | 30.99 (22.52, 39.62) | 61.64 (44.79, 78.79)   | 45.33 (32.97, 57.95)    | 40.91 (28.68, 54.41)   | 81.36 (57.05, 108.21)   | 59.65 (42.11, 79.40)    |
| <b>South Sudan</b>     | 7.44 (5.38, 9.55)    | 60.55 (43.75, 77.68)   | 121.62 (87.40, 157.96)  | 7.34 (5.09, 9.90)      | 59.76 (41.43, 80.58)    | 112.01 (77.43, 152.44)  |
| <b>Spain</b>           | 0.00 (0.00, 0.00)    | 0.00 (0.00, 0.00)      | 0.00 (0.00, 0.00)       | 0.00 (0.00, 0.00)      | 0.00 (0.00, 0.00)       | 0.00 (0.00, 0.00)       |
| <b>Sri Lanka</b>       | 9.67 (7.03, 12.39)   | 46.61 (33.88, 59.69)   | 44.84 (32.61, 57.01)    | 27.05 (18.68, 35.98)   | 130.36 (90.03, 173.39)  | 127.97 (90.13, 170.38)  |
| <b>Sudan</b>           | 26.03 (18.77, 33.52) | 64.45 (46.46, 83.00)   | 112.68 (81.47, 146.65)  | 51.64 (35.95, 69.16)   | 127.87 (89.01, 171.22)  | 224.43 (155.47, 305.45) |
| <b>Suriname</b>        | 0.18 (0.13, 0.24)    | 33.41 (23.72, 43.84)   | 39.09 (27.76, 50.85)    | 0.54 (0.38, 0.70)      | 99.23 (70.12, 128.32)   | 113.04 (80.32, 146.34)  |
| <b>Swaziland</b>       | 0.79 (0.56, 1.02)    | 61.17 (43.78, 79.47)   | 114.19 (80.74, 149.79)  | 0.93 (0.57, 1.36)      | 71.86 (43.94, 105.19)   | 137.92 (85.57, 200.74)  |
| <b>Sweden</b>          | 0.00 (0.00, 0.00)    | 0.00 (0.00, 0.00)      | 0.00 (0.00, 0.00)       | 0.00 (0.00, 0.00)      | 0.00 (0.00, 0.00)       | 0.00 (0.00, 0.00)       |
| <b>Switzerland</b>     | 2.14 (1.50, 2.85)    | 25.81 (18.07, 34.38)   | 15.41 (10.77, 20.31)    | 1.28 (0.88, 1.73)      | 15.42 (10.60, 20.89)    | 8.85 (6.07, 12.05)      |
| <b>Syria</b>           | 10.71 (7.74, 13.73)  | 57.54 (41.54, 73.74)   | 90.21 (65.03, 116.49)   | 17.02 (11.81, 22.80)   | 91.37 (63.44, 122.44)   | 145.14 (95.07, 203.80)  |
| <b>Tajikistan</b>      | 4.94 (3.58, 6.35)    | 58.15 (42.11, 74.73)   | 105.26 (75.64, 135.83)  | 7.16 (5.11, 9.40)      | 84.25 (60.08, 110.54)   | 118.15 (84.06, 154.62)  |
| <b>Tanzania</b>        | 29.49 (21.40, 37.75) | 55.26 (40.10, 70.72)   | 111.66 (80.03, 144.68)  | 29.57 (20.88, 38.78)   | 55.40 (39.13, 72.66)    | 102.94 (72.10, 136.87)  |
| <b>Thailand</b>        | 44.70 (32.46, 57.48) | 65.84 (47.80, 84.66)   | 54.71 (39.42, 70.19)    | 120.20 (86.91, 154.57) | 177.04 (128.00, 227.66) | 147.71 (106.95, 189.58) |
| <b>The Bahamas</b>     | 0.07 (0.05, 0.09)    | 17.55 (12.20, 23.06)   | 17.97 (12.60, 23.64)    | 0.16 (0.11, 0.21)      | 41.58 (29.32, 54.40)    | 41.84 (29.32, 54.63)    |
| <b>The Gambia</b>      | 1.44 (1.05, 1.86)    | 72.18 (52.26, 92.74)   | 154.64 (112.08, 199.68) | 1.56 (1.10, 2.07)      | 78.09 (54.87, 103.59)   | 152.74 (108.08, 202.17) |
| <b>Timor-Leste</b>     | 0.12 (0.08, 0.15)    | 9.82 (6.98, 12.85)     | 15.97 (11.34, 20.86)    | 0.31 (0.20, 0.45)      | 26.36 (16.72, 38.10)    | 41.55 (26.17, 59.52)    |

|                             |                        |                        |                         |                        |                         |                         |
|-----------------------------|------------------------|------------------------|-------------------------|------------------------|-------------------------|-------------------------|
| <b>Togo</b>                 | 6.53 (4.73, 8.38)      | 89.42 (64.76, 114.73)  | 163.94 (117.68, 212.81) | 6.75 (4.48, 9.37)      | 92.38 (61.29, 128.24)   | 158.90 (106.35, 219.49) |
| <b>Tonga</b>                | 0.00 (0.00, 0.00)      | 0.00 (0.00, 0.00)      | 0.00 (0.00, 0.00)       | 0.00 (0.00, 0.00)      | 0.00 (0.00, 0.00)       | 0.00 (0.00, 0.00)       |
| <b>Trinidad and Tobago</b>  | 0.34 (0.24, 0.44)      | 24.73 (17.42, 32.52)   | 22.64 (15.85, 29.68)    | 0.79 (0.56, 1.03)      | 58.21 (41.50, 75.65)    | 53.06 (37.48, 68.83)    |
| <b>Tunisia</b>              | 10.87 (7.83, 14.03)    | 96.60 (69.60, 124.68)  | 99.93 (72.54, 128.48)   | 17.39 (11.77, 23.70)   | 154.56 (104.59, 210.69) | 166.84 (112.62, 226.87) |
| <b>Turkey</b>               | 107.73 (77.61, 138.62) | 137.38 (98.97, 176.77) | 147.75 (106.34, 190.82) | 103.23 (73.62, 134.37) | 131.64 (93.88, 171.35)  | 144.75 (103.04, 189.76) |
| <b>Turkmenistan</b>         | 4.49 (3.23, 5.76)      | 83.47 (59.96, 107.04)  | 125.07 (88.85, 162.56)  | 8.08 (5.91, 10.19)     | 150.22 (109.89, 189.36) | 192.21 (140.50, 242.68) |
| <b>Uganda</b>               | 18.97 (13.84, 24.23)   | 48.46 (35.34, 61.89)   | 116.67 (84.54, 150.41)  | 20.43 (14.50, 26.67)   | 52.19 (37.04, 68.12)    | 112.70 (79.91, 149.04)  |
| <b>Ukraine</b>              | 31.03 (21.74, 40.58)   | 66.73 (46.74, 87.25)   | 44.57 (31.62, 58.46)    | 15.15 (10.40, 20.57)   | 32.58 (22.36, 44.23)    | 23.64 (16.18, 32.30)    |
| <b>United Arab Emirates</b> | 5.89 (4.26, 7.60)      | 64.39 (46.57, 83.11)   | 104.27 (75.17, 134.17)  | 11.63 (7.43, 16.37)    | 127.18 (81.21, 178.99)  | 217.26 (144.57, 299.97) |
| <b>United Kingdom</b>       | 9.43 (6.59, 12.36)     | 14.67 (10.26, 19.25)   | 8.85 (6.21, 11.60)      | 6.35 (4.46, 8.39)      | 9.89 (6.94, 13.07)      | 6.12 (4.27, 8.10)       |
| <b>United States</b>        | 0.00 (0.00, 0.00)      | 0.00 (0.00, 0.00)      | 0.00 (0.00, 0.00)       | 0.00 (0.00, 0.00)      | 0.00 (0.00, 0.00)       | 0.00 (0.00, 0.00)       |
| <b>Uruguay</b>              | 0.33 (0.23, 0.44)      | 9.51 (6.58, 12.70)     | 6.97 (4.87, 9.27)       | 0.41 (0.29, 0.54)      | 12.02 (8.48, 15.75)     | 9.01 (6.34, 11.73)      |
| <b>Uzbekistan</b>           | 22.17 (15.98, 28.45)   | 74.03 (53.37, 95.03)   | 105.80 (75.84, 136.97)  | 36.51 (26.41, 46.89)   | 121.94 (88.20, 156.62)  | 145.71 (105.49, 185.71) |
| <b>Vanuatu</b>              | 0.00 (0.00, 0.00)      | 0.00 (0.00, 0.00)      | 0.00 (0.00, 0.00)       | 0.00 (0.00, 0.00)      | 0.00 (0.00, 0.00)       | 0.00 (0.00, 0.00)       |
| <b>Venezuela</b>            | 32.17 (22.93, 42.01)   | 103.43 (73.73, 135.05) | 131.52 (94.17, 170.60)  | 48.77 (34.76, 63.70)   | 156.79 (111.74, 204.78) | 194.19 (137.84, 254.47) |
| <b>Vietnam</b>              | 27.89 (20.21, 35.80)   | 29.84 (21.62, 38.30)   | 33.74 (24.45, 43.41)    | 104.22 (74.13, 135.01) | 111.50 (79.31, 144.44)  | 123.22 (88.58, 160.01)  |
| <b>Virgin Islands, U.S.</b> | 0.05 (0.04, 0.07)      | 47.66 (33.60, 62.81)   | 30.54 (21.54, 40.20)    | 0.10 (0.07, 0.13)      | 92.05 (64.52, 121.11)   | 61.65 (43.18, 81.47)    |
| <b>Yemen</b>                | 16.01 (11.57, 20.53)   | 59.50 (42.98, 76.27)   | 119.38 (86.19, 154.56)  | 29.90 (19.63, 41.81)   | 111.09 (72.96, 155.36)  | 235.43 (152.58, 331.79) |
| <b>Zambia</b>               | 9.85 (7.13, 12.61)     | 60.64 (43.90, 77.58)   | 132.06 (94.54, 170.67)  | 10.91 (7.58, 14.49)    | 67.12 (46.63, 89.15)    | 130.59 (91.31, 173.75)  |
| <b>Zimbabwe</b>             | 10.43 (7.46, 13.42)    | 66.94 (47.92, 86.14)   | 143.36 (101.91, 186.83) | 13.56 (9.34, 18.47)    | 87.10 (59.98, 118.61)   | 186.08 (126.46, 253.26) |

Attributable burden of disease, ABD; Disability Adjusted Life Years, DALY

1  
2  
3  
4  
5  
6  
7  
8  
9  
10  
11  
12  
13  
14  
15  
16  
17  
18  
19  
20  
21  
22  
23  
24  
25  
26  
27  
28  
29  
30  
31  
32  
33  
34  
35  
36  
37  
38  
39  
40  
41  
42  
43  
44  
45  
46  
47

**Supplemental Table 5:** Years living with disability (YLD) and years of life lost (YLL) using the World Health Organization recommended level of PM<sub>2.5</sub> as the theoretical minimum risk exposure level (TMREL), 10 ug/m<sup>3</sup>

| Location                   | YLD (in 1000s)                   | YLD (per 100,000)    | Age Standardized YLD (per 100,000) | YLL in 1000s                     | YLL (per 100,000)       | Age Standardized YLL (per 100,000) |
|----------------------------|----------------------------------|----------------------|------------------------------------|----------------------------------|-------------------------|------------------------------------|
| <b>Global</b>              | 2,047.18<br>(1,352.47, 2,852.81) | 27.77 (18.35, 38.70) | 29.57 (19.51, 41.12)               | 6,189.43<br>(4,532.12, 7,756.55) | 83.97 (61.49, 105.23)   | 88.41 (64.89, 110.21)              |
| <b>Afghanistan</b>         | 11.38 (7.40, 16.05)              | 34.91 (22.70, 49.23) | 72.66 (47.99, 101.24)              | 58.20 (36.71, 84.14)             | 178.50 (112.59, 258.04) | 371.49 (234.67, 535.24)            |
| <b>Albania</b>             | 0.35 (0.22, 0.51)                | 12.23 (7.66, 17.63)  | 10.16 (6.56, 14.44)                | 1.24 (0.86, 1.68)                | 42.80 (29.59, 57.99)    | 36.93 (25.52, 49.36)               |
| <b>Algeria</b>             | 16.51 (10.74, 23.36)             | 41.67 (27.11, 58.94) | 51.08 (33.70, 71.66)               | 34.37 (23.90, 46.24)             | 86.72 (60.30, 116.67)   | 117.49 (82.32, 157.01)             |
| <b>American Samoa</b>      | 0.00 (0.00, 0.00)                | 0.00 (0.00, 0.00)    | 0.00 (0.00, 0.00)                  | 0.00 (0.00, 0.00)                | 0.00 (0.00, 0.00)       | 0.00 (0.00, 0.00)                  |
| <b>Andorra</b>             | 0.00 (0.00, 0.00)                | 0.00 (0.00, 0.00)    | 0.00 (0.00, 0.00)                  | 0.00 (0.00, 0.00)                | 0.00 (0.00, 0.00)       | 0.00 (0.00, 0.00)                  |
| <b>Angola</b>              | 4.75 (3.06, 6.74)                | 18.80 (12.11, 26.70) | 45.42 (28.98, 65.41)               | 8.12 (4.89, 11.95)               | 32.17 (19.37, 47.33)    | 63.10 (37.35, 93.36)               |
| <b>Antigua and Barbuda</b> | 0.01 (0.00, 0.01)                | 7.35 (4.67, 10.61)   | 7.93 (4.96, 11.45)                 | 0.03 (0.02, 0.04)                | 32.66 (22.97, 43.06)    | 33.92 (23.76, 44.69)               |
| <b>Argentina</b>           | 3.79 (2.46, 5.41)                | 8.72 (5.67, 12.45)   | 8.23 (5.38, 11.63)                 | 11.18 (7.97, 14.44)              | 25.75 (18.36, 33.26)    | 24.17 (17.10, 31.29)               |
| <b>Armenia</b>             | 1.35 (0.86, 1.93)                | 44.80 (28.75, 64.14) | 38.16 (24.70, 53.90)               | 1.57 (1.14, 2.01)                | 52.35 (37.83, 66.75)    | 44.76 (32.53, 57.09)               |
| <b>Australia</b>           | 0.00 (0.00, 0.00)                | 0.00 (0.00, 0.00)    | 0.00 (0.00, 0.00)                  | 0.00 (0.00, 0.00)                | 0.00 (0.00, 0.00)       | 0.00 (0.00, 0.00)                  |
| <b>Austria</b>             | 1.39 (0.91, 1.97)                | 16.06 (10.46, 22.69) | 9.76 (6.33, 13.77)                 | 3.31 (2.39, 4.23)                | 38.18 (27.54, 48.85)    | 20.31 (14.58, 25.97)               |
| <b>Azerbaijan</b>          | 3.37 (2.15, 4.82)                | 34.42 (21.96, 49.26) | 39.75 (25.46, 56.39)               | 7.84 (5.42, 10.57)               | 80.15 (55.38, 108.05)   | 85.05 (59.61, 114.53)              |
| <b>Bahrain</b>             | 0.45 (0.29, 0.64)                | 33.23 (21.28, 46.95) | 45.79 (30.36, 63.51)               | 0.80 (0.53, 1.10)                | 58.73 (39.05, 80.81)    | 122.97 (81.37, 170.08)             |



|                               |                      |                      |                      |                        |                        |                         |
|-------------------------------|----------------------|----------------------|----------------------|------------------------|------------------------|-------------------------|
| <b>Bangladesh</b>             | 37.08 (23.69, 52.70) | 23.04 (14.72, 32.74) | 32.69 (20.97, 46.84) | 121.54 (86.25, 157.96) | 75.51 (53.59, 98.13)   | 99.06 (70.79, 128.22)   |
| <b>Barbados</b>               | 0.04 (0.02, 0.05)    | 13.42 (8.66, 19.25)  | 10.15 (6.51, 14.53)  | 0.14 (0.10, 0.19)      | 51.08 (36.17, 66.61)   | 38.98 (27.74, 50.58)    |
| <b>Belarus</b>                | 1.97 (1.24, 2.84)    | 20.52 (12.95, 29.55) | 14.79 (9.32, 21.28)  | 1.97 (1.38, 2.61)      | 20.53 (14.38, 27.16)   | 15.50 (10.78, 20.51)    |
| <b>Belgium</b>                | 1.32 (0.85, 1.89)    | 11.67 (7.52, 16.67)  | 7.23 (4.69, 10.30)   | 2.35 (1.67, 3.07)      | 20.73 (14.76, 27.09)   | 11.06 (7.87, 14.31)     |
| <b>Belize</b>                 | 0.08 (0.05, 0.11)    | 20.92 (13.45, 29.53) | 33.49 (21.07, 47.66) | 0.50 (0.35, 0.65)      | 139.14 (98.42, 182.17) | 223.10 (160.26, 290.39) |
| <b>Benin</b>                  | 3.10 (1.99, 4.44)    | 28.39 (18.23, 40.69) | 58.86 (37.41, 83.26) | 8.58 (5.84, 11.62)     | 78.58 (53.52, 106.50)  | 124.46 (85.32, 168.16)  |
| <b>Bermuda</b>                | 0.00 (0.00, 0.00)    | 0.00 (0.00, 0.00)    | 0.00 (0.00, 0.00)    | 0.00 (0.00, 0.00)      | 0.00 (0.00, 0.00)      | 0.00 (0.00, 0.00)       |
| <b>Bhutan</b>                 | 0.20 (0.13, 0.29)    | 26.43 (17.18, 37.83) | 37.69 (24.18, 53.67) | 0.70 (0.44, 0.99)      | 89.89 (57.38, 127.53)  | 120.96 (78.99, 170.14)  |
| <b>Bolivia</b>                | 2.16 (1.39, 3.05)    | 20.03 (12.91, 28.34) | 27.69 (17.71, 39.25) | 16.08 (10.71, 22.15)   | 149.34 (99.51, 205.76) | 199.67 (131.35, 277.55) |
| <b>Bosnia and Herzegovina</b> | 1.31 (0.86, 1.84)    | 34.35 (22.45, 48.37) | 23.40 (15.40, 32.78) | 2.71 (1.91, 3.59)      | 71.24 (50.11, 94.22)   | 48.35 (34.13, 63.61)    |
| <b>Botswana</b>               | 0.35 (0.22, 0.50)    | 15.37 (9.81, 22.02)  | 24.81 (15.85, 35.70) | 0.71 (0.33, 1.18)      | 31.32 (14.44, 52.24)   | 53.00 (26.08, 85.70)    |
| <b>Brazil</b>                 | 4.41 (2.80, 6.34)    | 2.12 (1.34, 3.05)    | 2.33 (1.50, 3.35)    | 16.97 (12.08, 21.84)   | 8.17 (5.81, 10.51)     | 8.80 (6.27, 11.28)      |
| <b>Brunei</b>                 | 0.00 (0.00, 0.00)    | 0.00 (0.00, 0.00)    | 0.00 (0.00, 0.00)    | 0.00 (0.00, 0.00)      | 0.00 (0.00, 0.00)      | 0.00 (0.00, 0.00)       |
| <b>Bulgaria</b>               | 2.50 (1.59, 3.61)    | 34.41 (21.82, 49.60) | 20.53 (13.08, 29.27) | 6.27 (4.42, 8.25)      | 86.29 (60.85, 113.56)  | 55.44 (39.18, 73.03)    |
| <b>Burkina Faso</b>           | 4.35 (2.73, 6.24)    | 24.04 (15.12, 34.48) | 56.15 (35.78, 79.70) | 8.55 (6.01, 11.37)     | 47.26 (33.19, 62.82)   | 81.24 (58.85, 103.59)   |
| <b>Burundi</b>                | 2.31 (1.43, 3.36)    | 20.52 (12.68, 29.88) | 44.99 (28.60, 64.69) | 3.99 (2.70, 5.41)      | 35.45 (24.04, 48.15)   | 62.29 (42.49, 84.83)    |
| <b>Cambodia</b>               | 1.98 (1.26, 2.83)    | 12.68 (8.08, 18.16)  | 19.94 (12.95, 28.24) | 12.83 (9.19, 16.42)    | 82.28 (58.93, 105.28)  | 119.54 (85.88, 153.06)  |
| <b>Cameroon</b>               | 5.81 (3.63, 8.39)    | 24.83 (15.52, 35.84) | 50.15 (31.94, 71.52) | 21.11 (12.83, 30.99)   | 90.19 (54.82, 132.44)  | 133.16 (81.95, 194.45)  |
| <b>Canada</b>                 | 0.00 (0.00, 0.00)    | 0.00 (0.00, 0.00)    | 0.00 (0.00, 0.00)    | 0.00 (0.00, 0.00)      | 0.00 (0.00, 0.00)      | 0.00 (0.00, 0.00)       |



|                                         |                         |                      |                      |                           |                       |                        |
|-----------------------------------------|-------------------------|----------------------|----------------------|---------------------------|-----------------------|------------------------|
| <b>Cape Verde</b>                       | 0.19 (0.13, 0.28)       | 37.42 (24.19, 53.26) | 56.20 (36.22, 79.52) | 0.36 (0.26, 0.48)         | 70.08 (49.24, 92.83)  | 95.20 (67.30, 125.84)  |
| <b>Central African Republic</b>         | 1.29 (0.84, 1.85)       | 26.40 (17.04, 37.66) | 49.12 (31.59, 70.11) | 2.83 (1.89, 3.88)         | 57.76 (38.53, 79.11)  | 88.58 (59.53, 120.91)  |
| <b>Chad</b>                             | 3.68 (2.33, 5.29)       | 26.15 (16.56, 37.60) | 62.49 (39.21, 89.07) | 12.53 (8.60, 16.88)       | 89.10 (61.14, 120.06) | 127.12 (88.85, 171.12) |
| <b>Chile</b>                            | 5.86 (3.93, 8.15)       | 32.67 (21.89, 45.40) | 28.63 (18.99, 39.72) | 12.46 (8.21, 17.15)       | 69.41 (45.76, 95.58)  | 60.53 (40.65, 83.93)   |
| <b>China</b>                            | 331.78 (218.42, 466.00) | 23.98 (15.79, 33.68) | 21.03 (13.78, 29.52) | 856.85 (624.59, 1,078.57) | 61.94 (45.15, 77.96)  | 54.86 (40.22, 69.46)   |
| <b>Colombia</b>                         | 8.95 (5.86, 12.53)      | 18.55 (12.15, 25.96) | 21.15 (13.94, 29.73) | 22.82 (16.39, 29.50)      | 47.28 (33.95, 61.12)  | 56.01 (39.94, 71.97)   |
| <b>Comoros</b>                          | 0.11 (0.07, 0.16)       | 13.94 (8.47, 20.30)  | 26.87 (16.31, 39.51) | 0.14 (0.08, 0.21)         | 17.18 (9.56, 26.49)   | 29.47 (16.21, 46.31)   |
| <b>Congo</b>                            | 1.11 (0.71, 1.58)       | 24.06 (15.39, 34.22) | 46.15 (29.49, 65.68) | 1.93 (1.27, 2.70)         | 41.69 (27.52, 58.39)  | 72.35 (47.47, 102.93)  |
| <b>Costa Rica</b>                       | 1.26 (0.82, 1.80)       | 26.29 (17.00, 37.51) | 26.52 (16.89, 37.76) | 4.34 (3.15, 5.51)         | 90.21 (65.46, 114.55) | 90.06 (65.08, 114.16)  |
| <b>Cote d'Ivoire</b>                    | 6.07 (3.80, 8.80)       | 26.76 (16.73, 38.79) | 54.16 (34.62, 77.47) | 18.89 (12.82, 25.99)      | 83.25 (56.49, 114.55) | 126.83 (83.68, 176.27) |
| <b>Croatia</b>                          | 1.16 (0.76, 1.63)       | 27.24 (17.86, 38.51) | 16.60 (10.83, 23.33) | 2.35 (1.68, 3.03)         | 55.34 (39.71, 71.43)  | 31.67 (22.90, 40.74)   |
| <b>Cuba</b>                             | 1.78 (1.12, 2.57)       | 15.61 (9.86, 22.60)  | 11.49 (7.11, 16.73)  | 5.75 (4.12, 7.40)         | 50.51 (36.15, 64.94)  | 37.56 (27.06, 48.30)   |
| <b>Cyprus</b>                           | 0.13 (0.08, 0.19)       | 14.74 (9.42, 20.94)  | 11.20 (7.27, 15.77)  | 0.46 (0.33, 0.59)         | 51.55 (37.19, 66.01)  | 37.05 (26.77, 47.23)   |
| <b>Czech Republic</b>                   | 2.97 (1.93, 4.18)       | 27.72 (18.07, 39.04) | 17.92 (11.67, 25.29) | 3.88 (2.81, 4.91)         | 36.31 (26.31, 45.88)  | 22.97 (16.70, 28.99)   |
| <b>Democratic Republic of the Congo</b> | 16.28 (10.49, 23.09)    | 21.03 (13.55, 29.83) | 47.02 (30.71, 66.80) | 24.29 (17.18, 32.09)      | 31.38 (22.20, 41.45)  | 56.41 (39.94, 73.63)   |
| <b>Denmark</b>                          | 0.09 (0.06, 0.13)       | 1.57 (1.01, 2.25)    | 1.02 (0.65, 1.45)    | 0.16 (0.11, 0.21)         | 2.79 (1.94, 3.72)     | 1.68 (1.17, 2.23)      |
| <b>Djibouti</b>                         | 0.26 (0.16, 0.37)       | 28.73 (17.91, 41.12) | 49.96 (31.19, 72.63) | 0.37 (0.23, 0.54)         | 41.87 (26.26, 60.66)  | 63.99 (40.03, 92.06)   |
| <b>Dominica</b>                         | 0.01 (0.00, 0.01)       | 8.68 (5.45, 12.45)   | 8.83 (5.54, 12.83)   | 0.03 (0.02, 0.04)         | 45.61 (31.89, 60.63)  | 46.29 (32.37, 61.20)   |
| <b>Dominican Republic</b>               | 1.36 (0.88, 1.93)       | 12.89 (8.38, 18.30)  | 15.83 (10.23, 22.46) | 6.44 (4.54, 8.57)         | 61.16 (43.10, 81.36)  | 74.13 (51.99, 98.03)   |

|                                       |                      |                      |                      |                       |                         |                         |
|---------------------------------------|----------------------|----------------------|----------------------|-----------------------|-------------------------|-------------------------|
| <b>Ecuador</b>                        | 0.70 (0.44, 1.00)    | 4.31 (2.70, 6.16)    | 5.33 (3.34, 7.71)    | 5.26 (3.72, 6.80)     | 32.54 (23.05, 42.11)    | 40.58 (28.89, 52.39)    |
| <b>Egypt</b>                          | 37.61 (24.40, 53.11) | 41.26 (26.77, 58.26) | 56.31 (37.08, 78.54) | 86.38 (52.51, 126.17) | 94.76 (57.61, 138.42)   | 140.01 (83.80, 210.08)  |
| <b>El Salvador</b>                    | 2.36 (1.56, 3.28)    | 38.47 (25.48, 53.52) | 43.60 (29.03, 60.66) | 18.89 (13.48, 24.53)  | 307.81 (219.64, 399.65) | 346.83 (246.67, 453.72) |
| <b>Equatorial Guinea</b>              | 0.22 (0.14, 0.31)    | 26.05 (16.43, 37.21) | 45.32 (29.33, 64.00) | 0.24 (0.10, 0.40)     | 27.94 (11.75, 47.08)    | 46.88 (20.55, 77.19)    |
| <b>Eritrea</b>                        | 1.14 (0.71, 1.63)    | 21.69 (13.54, 31.09) | 47.04 (29.89, 68.11) | 1.83 (1.23, 2.51)     | 34.92 (23.54, 47.90)    | 64.88 (44.43, 89.00)    |
| <b>Estonia</b>                        | 0.00 (0.00, 0.00)    | 0.00 (0.00, 0.00)    | 0.00 (0.00, 0.00)    | 0.00 (0.00, 0.00)     | 0.00 (0.00, 0.00)       | 0.00 (0.00, 0.00)       |
| <b>Ethiopia</b>                       | 23.83 (15.00, 34.32) | 23.97 (15.09, 34.52) | 48.77 (30.22, 71.45) | 44.18 (30.67, 58.65)  | 44.43 (30.85, 58.98)    | 79.02 (55.61, 105.48)   |
| <b>Federated States of Micronesia</b> | 0.00 (0.00, 0.00)    | 0.00 (0.00, 0.00)    | 0.00 (0.00, 0.00)    | 0.00 (0.00, 0.00)     | 0.00 (0.00, 0.00)       | 0.00 (0.00, 0.00)       |
| <b>Fiji</b>                           | 0.00 (0.00, 0.00)    | 0.00 (0.00, 0.00)    | 0.00 (0.00, 0.00)    | 0.00 (0.00, 0.00)     | 0.00 (0.00, 0.00)       | 0.00 (0.00, 0.00)       |
| <b>Finland</b>                        | 0.00 (0.00, 0.00)    | 0.00 (0.00, 0.00)    | 0.00 (0.00, 0.00)    | 0.00 (0.00, 0.00)     | 0.00 (0.00, 0.00)       | 0.00 (0.00, 0.00)       |
| <b>France</b>                         | 3.11 (2.03, 4.41)    | 4.76 (3.11, 6.77)    | 2.95 (1.91, 4.20)    | 4.23 (3.00, 5.48)     | 6.49 (4.60, 8.40)       | 3.31 (2.35, 4.27)       |
| <b>Gabon</b>                          | 0.50 (0.32, 0.70)    | 28.69 (18.34, 40.78) | 46.46 (29.80, 66.25) | 0.84 (0.53, 1.21)     | 48.90 (30.79, 70.37)    | 74.79 (47.27, 107.42)   |
| <b>Georgia</b>                        | 1.86 (1.20, 2.65)    | 46.54 (30.03, 66.21) | 35.34 (23.26, 49.51) | 3.65 (2.63, 4.71)     | 91.14 (65.70, 117.61)   | 72.98 (52.61, 94.05)    |
| <b>Germany</b>                        | 8.06 (5.24, 11.45)   | 9.63 (6.27, 13.69)   | 5.28 (3.45, 7.55)    | 20.35 (14.52, 26.20)  | 24.33 (17.36, 31.33)    | 11.19 (7.93, 14.43)     |
| <b>Ghana</b>                          | 8.84 (5.59, 12.70)   | 32.23 (20.38, 46.34) | 58.37 (37.61, 83.81) | 18.51 (13.07, 24.49)  | 67.52 (47.67, 89.31)    | 99.14 (69.87, 131.27)   |
| <b>Greece</b>                         | 1.07 (0.70, 1.50)    | 9.83 (6.44, 13.75)   | 5.43 (3.51, 7.64)    | 2.44 (1.73, 3.16)     | 22.35 (15.82, 28.97)    | 10.75 (7.65, 13.89)     |
| <b>Greenland</b>                      | 0.00 (0.00, 0.00)    | 0.00 (0.00, 0.00)    | 0.00 (0.00, 0.00)    | 0.00 (0.00, 0.00)     | 0.00 (0.00, 0.00)       | 0.00 (0.00, 0.00)       |
| <b>Grenada</b>                        | 0.01 (0.01, 0.02)    | 10.16 (6.56, 14.37)  | 11.75 (7.54, 16.63)  | 0.08 (0.05, 0.10)     | 70.22 (49.43, 92.89)    | 81.18 (56.83, 106.89)   |
| <b>Guam</b>                           | 0.00 (0.00, 0.00)    | 0.00 (0.00, 0.00)    | 0.00 (0.00, 0.00)    | 0.00 (0.00, 0.00)     | 0.00 (0.00, 0.00)       | 0.00 (0.00, 0.00)       |

|                      |                         |                      |                       |                               |                         |                         |
|----------------------|-------------------------|----------------------|-----------------------|-------------------------------|-------------------------|-------------------------|
| <b>Guatemala</b>     | 4.73 (3.07, 6.64)       | 28.94 (18.78, 40.59) | 46.99 (30.68, 65.82)  | 26.09 (17.47, 35.84)          | 159.50 (106.84, 219.12) | 246.08 (164.39, 337.58) |
| <b>Guinea</b>        | 3.04 (1.91, 4.35)       | 24.19 (15.18, 34.62) | 48.23 (30.41, 69.71)  | 6.97 (4.64, 9.66)             | 55.45 (36.87, 76.79)    | 82.86 (55.23, 114.90)   |
| <b>Guinea-Bissau</b> | 0.68 (0.43, 0.97)       | 36.93 (23.20, 52.74) | 70.17 (44.44, 100.88) | 2.21 (1.53, 3.01)             | 119.33 (82.89, 162.89)  | 180.09 (123.43, 245.78) |
| <b>Guyana</b>        | 0.08 (0.05, 0.11)       | 9.99 (6.40, 14.25)   | 13.15 (8.41, 18.83)   | 0.52 (0.37, 0.68)             | 67.28 (47.75, 88.08)    | 80.77 (57.43, 105.42)   |
| <b>Haiti</b>         | 2.23 (1.43, 3.18)       | 20.84 (13.32, 29.67) | 33.43 (21.78, 47.35)  | 15.78 (9.78, 22.75)           | 147.20 (91.19, 212.16)  | 207.97 (129.75, 304.16) |
| <b>Honduras</b>      | 2.10 (1.34, 3.00)       | 25.89 (16.50, 37.04) | 40.84 (26.30, 57.89)  | 13.57 (8.47, 19.78)           | 167.57 (104.57, 244.32) | 269.11 (169.22, 385.92) |
| <b>Hungary</b>       | 3.19 (2.09, 4.53)       | 31.41 (20.59, 44.56) | 20.06 (13.09, 28.12)  | 5.26 (3.84, 6.69)             | 51.78 (37.80, 65.79)    | 32.64 (23.78, 41.63)    |
| <b>Iceland</b>       | 0.00 (0.00, 0.00)       | 0.00 (0.00, 0.00)    | 0.00 (0.00, 0.00)     | 0.00 (0.00, 0.00)             | 0.00 (0.00, 0.00)       | 0.00 (0.00, 0.00)       |
| <b>India</b>         | 321.95 (209.02, 458.60) | 24.55 (15.94, 34.96) | 32.64 (21.08, 46.40)  | 1,474.63 (1,061.17, 1,912.57) | 112.43 (80.90, 145.82)  | 138.74 (99.54, 179.15)  |
| <b>Indonesia</b>     | 20.12 (12.80, 28.94)    | 7.81 (4.97, 11.23)   | 9.92 (6.37, 14.17)    | 111.23 (80.12, 141.74)        | 43.18 (31.10, 55.02)    | 50.58 (36.47, 64.90)    |
| <b>Iran</b>          | 28.80 (18.43, 40.61)    | 36.44 (23.32, 51.38) | 45.00 (29.25, 63.43)  | 46.01 (31.39, 62.97)          | 58.22 (39.72, 79.67)    | 81.82 (54.70, 112.73)   |
| <b>Iraq</b>          | 13.83 (8.95, 19.67)     | 37.97 (24.58, 54.01) | 73.16 (47.17, 102.82) | 40.16 (26.07, 56.62)          | 110.27 (71.57, 155.45)  | 229.39 (149.71, 321.96) |
| <b>Ireland</b>       | 0.00 (0.00, 0.00)       | 0.00 (0.00, 0.00)    | 0.00 (0.00, 0.00)     | 0.00 (0.00, 0.00)             | 0.00 (0.00, 0.00)       | 0.00 (0.00, 0.00)       |
| <b>Israel</b>        | 2.09 (1.40, 2.89)       | 25.95 (17.34, 35.89) | 23.94 (15.95, 33.16)  | 5.65 (3.94, 7.62)             | 70.20 (48.95, 94.67)    | 61.63 (42.72, 83.12)    |
| <b>Italy</b>         | 14.15 (9.32, 20.00)     | 22.53 (14.84, 31.85) | 12.06 (7.69, 17.11)   | 27.87 (20.24, 35.52)          | 44.38 (32.22, 56.56)    | 19.95 (14.40, 25.31)    |
| <b>Jamaica</b>       | 0.48 (0.31, 0.69)       | 17.14 (11.12, 24.35) | 17.84 (11.51, 25.43)  | 2.32 (1.45, 3.35)             | 82.00 (51.19, 118.28)   | 85.43 (54.56, 123.21)   |
| <b>Japan</b>         | 21.47 (14.32, 30.11)    | 16.73 (11.16, 23.46) | 8.23 (5.40, 11.60)    | 26.97 (19.23, 34.38)          | 21.02 (14.99, 26.79)    | 8.66 (6.18, 11.05)      |
| <b>Jordan</b>        | 2.44 (1.58, 3.45)       | 32.19 (20.85, 45.56) | 53.15 (34.73, 74.27)  | 6.45 (4.23, 9.15)             | 85.19 (55.83, 120.81)   | 159.42 (103.99, 222.47) |
| <b>Kazakhstan</b>    | 3.82 (2.42, 5.48)       | 21.77 (13.80, 31.22) | 25.86 (16.34, 37.22)  | 6.30 (4.37, 8.45)             | 35.91 (24.95, 48.21)    | 39.04 (27.02, 52.79)    |

|                   |                   |                      |                      |                     |                        |                         |
|-------------------|-------------------|----------------------|----------------------|---------------------|------------------------|-------------------------|
| <b>Kenya</b>      | 3.80 (2.34, 5.50) | 8.22 (5.06, 11.90)   | 17.10 (10.69, 24.81) | 4.75 (3.21, 6.52)   | 10.28 (6.95, 14.12)    | 18.54 (12.62, 25.56)    |
| <b>Kiribati</b>   | 0.00 (0.00, 0.00) | 0.00 (0.00, 0.00)    | 0.00 (0.00, 0.00)    | 0.00 (0.00, 0.00)   | 0.00 (0.00, 0.00)      | 0.00 (0.00, 0.00)       |
| <b>Kuwait</b>     | 1.20 (0.77, 1.70) | 30.72 (19.84, 43.62) | 44.74 (29.67, 62.64) | 1.05 (0.68, 1.49)   | 26.96 (17.38, 38.24)   | 69.41 (45.60, 96.77)    |
| <b>Kyrgyzstan</b> | 0.87 (0.56, 1.26) | 14.82 (9.44, 21.32)  | 21.74 (13.81, 31.04) | 2.17 (1.56, 2.81)   | 36.88 (26.53, 47.67)   | 42.44 (30.47, 54.85)    |
| <b>Laos</b>       | 1.01 (0.65, 1.42) | 14.81 (9.55, 20.85)  | 25.84 (16.91, 36.11) | 7.60 (5.42, 10.03)  | 111.81 (79.72, 147.52) | 162.90 (116.05, 212.45) |
| <b>Latvia</b>     | 0.77 (0.48, 1.11) | 34.81 (21.71, 50.28) | 20.85 (13.31, 30.06) | 0.82 (0.60, 1.06)   | 37.18 (26.91, 48.02)   | 23.97 (17.24, 30.85)    |
| <b>Lebanon</b>    | 2.04 (1.33, 2.89) | 35.47 (23.14, 50.11) | 37.86 (24.58, 53.38) | 2.28 (1.59, 3.04)   | 39.53 (27.52, 52.77)   | 43.56 (30.06, 58.69)    |
| <b>Lesotho</b>    | 0.57 (0.36, 0.80) | 26.65 (16.99, 37.80) | 46.85 (30.05, 66.51) | 1.45 (0.88, 2.08)   | 68.07 (41.32, 97.76)   | 121.69 (77.01, 173.73)  |
| <b>Liberia</b>    | 0.00 (0.00, 0.00) | 0.00 (0.00, 0.00)    | 0.00 (0.00, 0.00)    | 0.00 (0.00, 0.00)   | 0.00 (0.00, 0.00)      | 0.00 (0.00, 0.00)       |
| <b>Libya</b>      | 2.23 (1.42, 3.19) | 35.36 (22.49, 50.60) | 46.50 (29.87, 65.78) | 7.14 (4.85, 9.72)   | 113.45 (77.09, 154.34) | 172.32 (119.22, 232.55) |
| <b>Lithuania</b>  | 0.89 (0.56, 1.28) | 28.24 (17.74, 40.50) | 17.04 (10.74, 24.36) | 0.78 (0.56, 0.99)   | 24.78 (17.86, 31.54)   | 16.42 (11.84, 20.85)    |
| <b>Luxembourg</b> | 0.06 (0.04, 0.09) | 11.11 (7.24, 15.74)  | 8.10 (5.21, 11.45)   | 0.11 (0.08, 0.14)   | 19.89 (14.17, 25.87)   | 13.41 (9.60, 17.33)     |
| <b>Macedonia</b>  | 0.65 (0.42, 0.91) | 31.14 (20.16, 43.97) | 24.97 (16.15, 35.05) | 1.60 (1.16, 2.03)   | 76.95 (56.06, 97.74)   | 60.84 (44.31, 77.06)    |
| <b>Madagascar</b> | 3.36 (2.10, 4.87) | 13.87 (8.68, 20.13)  | 28.95 (18.03, 41.75) | 5.80 (3.78, 8.11)   | 23.98 (15.64, 33.53)   | 39.25 (26.46, 54.52)    |
| <b>Malawi</b>     | 3.00 (1.86, 4.35) | 17.44 (10.78, 25.27) | 39.69 (24.63, 58.00) | 6.15 (4.15, 8.45)   | 35.72 (24.11, 49.08)   | 63.21 (42.89, 86.75)    |
| <b>Malaysia</b>   | 2.42 (1.53, 3.50) | 7.99 (5.04, 11.55)   | 9.96 (6.17, 14.52)   | 8.82 (6.28, 11.47)  | 29.11 (20.73, 37.88)   | 37.66 (26.80, 48.94)    |
| <b>Maldives</b>   | 0.06 (0.04, 0.08) | 16.04 (10.34, 22.99) | 22.73 (14.69, 32.24) | 0.35 (0.24, 0.48)   | 96.76 (64.94, 132.54)  | 148.14 (101.30, 203.53) |
| <b>Mali</b>       | 4.56 (2.88, 6.50) | 25.95 (16.37, 36.99) | 60.85 (38.91, 87.43) | 11.76 (7.72, 16.48) | 66.94 (43.93, 93.80)   | 100.92 (66.62, 141.60)  |
| <b>Malta</b>      | 0.05 (0.03, 0.08) | 12.63 (8.13, 18.04)  | 8.13 (5.27, 11.59)   | 0.12 (0.08, 0.16)   | 28.88 (19.97, 38.96)   | 17.53 (12.08, 23.68)    |

|                                 |                      |                      |                      |                         |                         |                         |
|---------------------------------|----------------------|----------------------|----------------------|-------------------------|-------------------------|-------------------------|
| <b>Marshall Islands</b>         | 0.00 (0.00, 0.00)    | 0.00 (0.00, 0.00)    | 0.00 (0.00, 0.00)    | 0.00 (0.00, 0.00)       | 0.00 (0.00, 0.00)       | 0.00 (0.00, 0.00)       |
| <b>Mauritania</b>               | 1.32 (0.83, 1.90)    | 32.38 (20.25, 46.54) | 58.81 (37.13, 84.70) | 2.48 (1.61, 3.53)       | 60.69 (39.30, 86.46)    | 96.33 (62.60, 135.98)   |
| <b>Mauritius</b>                | 0.24 (0.16, 0.35)    | 19.01 (12.30, 27.24) | 17.24 (11.10, 24.57) | 1.86 (1.30, 2.46)       | 146.16 (101.76, 192.74) | 129.09 (90.56, 170.44)  |
| <b>Mexico</b>                   | 50.01 (33.33, 69.50) | 39.37 (26.24, 54.71) | 48.23 (31.98, 67.07) | 260.98 (191.44, 327.02) | 205.43 (150.69, 257.41) | 255.19 (187.29, 320.56) |
| <b>Moldova</b>                  | 0.63 (0.39, 0.92)    | 15.53 (9.66, 22.71)  | 13.72 (8.48, 20.01)  | 0.71 (0.51, 0.94)       | 17.51 (12.42, 23.01)    | 14.85 (10.67, 19.38)    |
| <b>Mongolia</b>                 | 1.04 (0.65, 1.49)    | 35.07 (21.99, 50.37) | 51.89 (32.88, 74.65) | 2.83 (1.30, 4.60)       | 95.77 (44.00, 155.77)   | 115.55 (59.53, 182.08)  |
| <b>Montenegro</b>               | 0.17 (0.11, 0.25)    | 27.41 (17.04, 39.88) | 20.89 (12.93, 30.41) | 0.50 (0.36, 0.65)       | 80.06 (57.23, 103.50)   | 61.29 (44.27, 79.51)    |
| <b>Morocco</b>                  | 11.42 (7.35, 16.31)  | 33.22 (21.39, 47.46) | 38.65 (24.66, 55.35) | 42.69 (28.30, 59.15)    | 124.18 (82.33, 172.09)  | 151.44 (98.73, 213.29)  |
| <b>Mozambique</b>               | 3.79 (2.38, 5.51)    | 13.53 (8.51, 19.68)  | 28.99 (18.34, 41.69) | 6.78 (3.59, 10.58)      | 24.23 (12.83, 37.80)    | 40.01 (21.40, 62.78)    |
| <b>Myanmar</b>                  | 10.37 (6.58, 14.75)  | 19.20 (12.19, 27.30) | 24.72 (15.88, 35.01) | 61.62 (43.47, 81.51)    | 114.05 (80.47, 150.87)  | 139.84 (99.41, 183.83)  |
| <b>Namibia</b>                  | 0.48 (0.30, 0.68)    | 19.39 (12.30, 27.69) | 34.76 (21.93, 49.98) | 0.91 (0.55, 1.35)       | 37.20 (22.42, 54.94)    | 68.14 (41.46, 101.42)   |
| <b>Nepal</b>                    | 7.76 (5.03, 10.96)   | 27.19 (17.61, 38.40) | 40.74 (25.91, 58.14) | 26.15 (17.54, 36.12)    | 91.60 (61.45, 126.50)   | 130.76 (87.57, 179.62)  |
| <b>Netherlands</b>              | 1.41 (0.93, 2.00)    | 8.20 (5.41, 11.61)   | 5.30 (3.47, 7.47)    | 2.42 (1.73, 3.16)       | 14.10 (10.06, 18.35)    | 8.19 (5.83, 10.64)      |
| <b>New Zealand</b>              | 0.00 (0.00, 0.00)    | 0.00 (0.00, 0.00)    | 0.00 (0.00, 0.00)    | 0.00 (0.00, 0.00)       | 0.00 (0.00, 0.00)       | 0.00 (0.00, 0.00)       |
| <b>Nicaragua</b>                | 1.77 (1.16, 2.46)    | 29.07 (18.97, 40.43) | 40.26 (26.36, 57.18) | 13.96 (9.76, 18.71)     | 229.28 (160.23, 307.36) | 310.15 (217.89, 411.28) |
| <b>Niger</b>                    | 5.20 (3.31, 7.42)    | 26.20 (16.65, 37.37) | 60.33 (38.50, 85.59) | 13.81 (8.60, 20.07)     | 69.55 (43.33, 101.09)   | 105.32 (66.30, 150.45)  |
| <b>Nigeria</b>                  | 43.99 (27.51, 63.27) | 24.11 (15.07, 34.67) | 52.00 (33.07, 74.66) | 41.45 (27.56, 58.05)    | 22.71 (15.10, 31.81)    | 32.30 (21.25, 45.22)    |
| <b>North Korea</b>              | 7.11 (4.68, 9.91)    | 28.27 (18.59, 39.40) | 29.04 (19.01, 40.78) | 20.75 (14.76, 27.05)    | 82.46 (58.68, 107.52)   | 81.68 (58.19, 106.40)   |
| <b>Northern Mariana Islands</b> | 0.00 (0.00, 0.00)    | 2.71 (1.71, 3.93)    | 5.04 (3.25, 7.38)    | 0.01 (0.01, 0.02)       | 11.17 (7.31, 15.58)     | 24.92 (16.91, 34.15)    |

|                                         |                      |                      |                      |                         |                         |                         |
|-----------------------------------------|----------------------|----------------------|----------------------|-------------------------|-------------------------|-------------------------|
| <b>Norway</b>                           | 0.00 (0.00, 0.00)    | 0.00 (0.00, 0.00)    | 0.00 (0.00, 0.00)    | 0.00 (0.00, 0.00)       | 0.00 (0.00, 0.00)       | 0.00 (0.00, 0.00)       |
| <b>Oman</b>                             | 1.47 (0.95, 2.08)    | 32.74 (21.18, 46.50) | 51.15 (33.37, 71.18) | 1.64 (1.19, 2.10)       | 36.53 (26.50, 46.90)    | 81.73 (59.02, 104.40)   |
| <b>Pakistan</b>                         | 34.42 (21.89, 48.96) | 18.20 (11.58, 25.90) | 28.80 (18.48, 41.01) | 210.88 (125.43, 314.47) | 111.54 (66.35, 166.34)  | 154.47 (89.68, 232.29)  |
| <b>Palestine</b>                        | 1.25 (0.78, 1.78)    | 26.71 (16.74, 38.13) | 52.66 (33.84, 74.28) | 4.32 (3.14, 5.52)       | 92.41 (67.13, 118.05)   | 212.38 (153.03, 269.56) |
| <b>Panama</b>                           | 0.28 (0.18, 0.40)    | 7.09 (4.52, 10.09)   | 8.00 (5.19, 11.49)   | 1.05 (0.73, 1.41)       | 26.83 (18.48, 36.00)    | 30.07 (20.90, 40.10)    |
| <b>Papua New Guinea</b>                 | 0.07 (0.04, 0.10)    | 0.93 (0.58, 1.36)    | 1.67 (1.06, 2.43)    | 0.52 (0.30, 0.81)       | 6.86 (3.87, 10.63)      | 11.46 (6.63, 17.44)     |
| <b>Paraguay</b>                         | 0.49 (0.31, 0.70)    | 7.36 (4.69, 10.55)   | 10.05 (6.38, 14.56)  | 3.30 (2.33, 4.34)       | 49.62 (34.99, 65.31)    | 67.85 (47.96, 89.29)    |
| <b>Peru</b>                             | 4.64 (2.96, 6.61)    | 14.79 (9.43, 21.04)  | 18.57 (11.82, 26.30) | 24.48 (16.62, 33.12)    | 77.98 (52.94, 105.51)   | 96.60 (65.85, 131.90)   |
| <b>Philippines</b>                      | 20.80 (13.13, 29.53) | 20.63 (13.02, 29.29) | 29.10 (18.93, 41.54) | 186.82 (133.90, 240.91) | 185.33 (132.84, 238.99) | 255.18 (182.55, 330.77) |
| <b>Poland</b>                           | 11.96 (7.93, 16.76)  | 30.74 (20.37, 43.07) | 20.94 (13.63, 29.43) | 17.47 (12.68, 22.34)    | 44.89 (32.60, 57.40)    | 30.18 (21.90, 38.44)    |
| <b>Portugal</b>                         | 0.00 (0.00, 0.00)    | 0.00 (0.00, 0.00)    | 0.00 (0.00, 0.00)    | 0.00 (0.00, 0.00)       | 0.00 (0.00, 0.00)       | 0.00 (0.00, 0.00)       |
| <b>Puerto Rico</b>                      | 0.86 (0.57, 1.22)    | 23.38 (15.40, 32.99) | 17.72 (11.58, 25.08) | 3.16 (2.28, 4.09)       | 85.78 (61.78, 110.89)   | 65.23 (46.53, 84.36)    |
| <b>Qatar</b>                            | 0.64 (0.41, 0.91)    | 28.76 (18.45, 41.08) | 43.44 (28.83, 60.48) | 0.60 (0.37, 0.89)       | 27.23 (16.48, 40.22)    | 85.38 (52.42, 125.21)   |
| <b>Romania</b>                          | 4.50 (2.95, 6.27)    | 23.05 (15.11, 32.11) | 14.65 (9.64, 20.51)  | 9.22 (6.64, 11.78)      | 47.22 (34.00, 60.35)    | 30.85 (22.35, 39.37)    |
| <b>Russia</b>                           | 24.25 (14.97, 35.25) | 16.37 (10.11, 23.80) | 12.26 (7.66, 17.92)  | 28.83 (17.30, 42.90)    | 19.46 (11.68, 28.96)    | 15.07 (9.09, 22.33)     |
| <b>Rwanda</b>                           | 2.16 (1.34, 3.16)    | 18.59 (11.49, 27.16) | 38.97 (23.92, 56.67) | 3.09 (1.85, 4.56)       | 26.57 (15.90, 39.25)    | 48.01 (27.89, 71.57)    |
| <b>Saint Lucia</b>                      | 0.02 (0.01, 0.02)    | 8.62 (5.35, 12.60)   | 8.46 (5.30, 12.23)   | 0.07 (0.05, 0.09)       | 39.69 (28.34, 51.29)    | 38.79 (27.60, 50.27)    |
| <b>Saint Vincent and the Grenadines</b> | 0.01 (0.01, 0.01)    | 8.60 (5.41, 12.47)   | 9.38 (5.98, 13.62)   | 0.05 (0.04, 0.07)       | 46.42 (32.95, 60.58)    | 49.69 (35.22, 64.45)    |
| <b>Samoa</b>                            | 0.00 (0.00, 0.00)    | 0.00 (0.00, 0.00)    | 0.00 (0.00, 0.00)    | 0.00 (0.00, 0.00)       | 0.00 (0.00, 0.00)       | 0.00 (0.00, 0.00)       |



|                              |                      |                      |                      |                      |                        |                         |
|------------------------------|----------------------|----------------------|----------------------|----------------------|------------------------|-------------------------|
| <b>Sao Tome and Principe</b> | 0.02 (0.01, 0.02)    | 8.42 (5.27, 12.30)   | 16.18 (10.16, 23.39) | 0.06 (0.04, 0.08)    | 30.25 (19.95, 42.51)   | 50.89 (34.43, 70.03)    |
| <b>Saudi Arabia</b>          | 9.55 (6.17, 13.59)   | 30.39 (19.64, 43.22) | 45.30 (29.76, 63.49) | 24.50 (17.61, 31.42) | 77.94 (56.01, 99.95)   | 163.92 (119.09, 209.47) |
| <b>Senegal</b>               | 4.70 (2.98, 6.76)    | 31.09 (19.73, 44.71) | 64.85 (41.07, 93.06) | 12.48 (8.87, 16.46)  | 82.62 (58.69, 108.93)  | 136.81 (98.45, 176.64)  |
| <b>Serbia</b>                | 2.52 (1.62, 3.55)    | 28.40 (18.33, 40.09) | 18.58 (12.08, 26.25) | 7.15 (5.19, 9.13)    | 80.74 (58.65, 103.06)  | 52.76 (38.15, 66.92)    |
| <b>Seychelles</b>            | 0.01 (0.00, 0.01)    | 5.72 (3.48, 8.36)    | 5.94 (3.76, 8.61)    | 0.05 (0.04, 0.07)    | 53.82 (37.25, 72.00)   | 56.39 (38.89, 75.12)    |
| <b>Sierra Leone</b>          | 0.87 (0.54, 1.26)    | 13.52 (8.40, 19.57)  | 28.68 (17.81, 41.78) | 2.50 (1.64, 3.50)    | 38.71 (25.34, 54.12)   | 56.96 (38.11, 79.27)    |
| <b>Singapore</b>             | 0.95 (0.63, 1.33)    | 24.28 (16.15, 33.90) | 19.00 (12.57, 26.55) | 1.73 (1.19, 2.35)    | 44.08 (30.37, 59.92)   | 36.25 (24.74, 49.52)    |
| <b>Slovakia</b>              | 1.39 (0.89, 1.98)    | 24.98 (15.97, 35.70) | 18.19 (11.63, 26.15) | 2.49 (1.77, 3.23)    | 44.78 (31.88, 58.16)   | 32.63 (23.12, 42.46)    |
| <b>Slovenia</b>              | 0.51 (0.33, 0.73)    | 24.86 (16.15, 35.49) | 15.15 (9.85, 21.15)  | 0.49 (0.35, 0.64)    | 23.98 (17.15, 31.24)   | 12.93 (9.30, 16.75)     |
| <b>Solomon Islands</b>       | 0.00 (0.00, 0.00)    | 0.00 (0.00, 0.00)    | 0.00 (0.00, 0.00)    | 0.00 (0.00, 0.00)    | 0.00 (0.00, 0.00)      | 0.00 (0.00, 0.00)       |
| <b>Somalia</b>               | 1.70 (1.06, 2.46)    | 15.65 (9.79, 22.69)  | 32.99 (20.74, 47.70) | 3.16 (2.08, 4.47)    | 29.12 (19.22, 41.19)   | 51.46 (33.43, 72.91)    |
| <b>South Africa</b>          | 19.72 (12.80, 27.66) | 36.70 (23.82, 51.49) | 48.91 (31.84, 68.99) | 58.33 (42.65, 73.98) | 108.58 (79.39, 137.71) | 137.43 (99.68, 173.95)  |
| <b>South Korea</b>           | 17.38 (11.76, 23.83) | 34.56 (23.38, 47.39) | 25.33 (17.04, 34.81) | 23.55 (15.11, 33.25) | 46.84 (30.04, 66.12)   | 34.25 (22.30, 47.93)    |
| <b>South Sudan</b>           | 2.99 (1.89, 4.30)    | 24.33 (15.36, 34.97) | 51.75 (32.09, 75.36) | 4.35 (2.72, 6.21)    | 35.39 (22.17, 50.52)   | 59.89 (37.95, 85.45)    |
| <b>Spain</b>                 | 0.00 (0.00, 0.00)    | 0.00 (0.00, 0.00)    | 0.00 (0.00, 0.00)    | 0.00 (0.00, 0.00)    | 0.00 (0.00, 0.00)      | 0.00 (0.00, 0.00)       |
| <b>Sri Lanka</b>             | 4.86 (3.15, 6.82)    | 23.41 (15.19, 32.87) | 23.28 (14.92, 33.03) | 22.08 (14.85, 30.20) | 106.42 (71.55, 145.57) | 105.07 (70.89, 142.32)  |
| <b>Sudan</b>                 | 12.33 (7.95, 17.47)  | 30.53 (19.68, 43.26) | 54.58 (36.28, 75.67) | 39.11 (26.35, 54.08) | 96.84 (65.23, 133.89)  | 169.37 (111.48, 238.89) |
| <b>Suriname</b>              | 0.07 (0.05, 0.10)    | 13.05 (8.47, 18.56)  | 14.93 (9.48, 21.37)  | 0.47 (0.33, 0.61)    | 85.96 (60.88, 112.08)  | 97.82 (69.19, 128.13)   |
| <b>Swaziland</b>             | 0.27 (0.18, 0.39)    | 21.09 (13.74, 29.99) | 40.62 (26.32, 58.01) | 0.66 (0.34, 1.02)    | 50.88 (26.32, 78.97)   | 97.54 (51.30, 152.07)   |



|                             |                      |                      |                      |                        |                         |                         |
|-----------------------------|----------------------|----------------------|----------------------|------------------------|-------------------------|-------------------------|
| <b>Sweden</b>               | 0.00 (0.00, 0.00)    | 0.00 (0.00, 0.00)    | 0.00 (0.00, 0.00)    | 0.00 (0.00, 0.00)      | 0.00 (0.00, 0.00)       | 0.00 (0.00, 0.00)       |
| <b>Switzerland</b>          | 0.57 (0.36, 0.82)    | 6.86 (4.36, 9.91)    | 4.31 (2.76, 6.29)    | 0.70 (0.47, 0.98)      | 8.48 (5.71, 11.87)      | 4.52 (2.97, 6.31)       |
| <b>Syria</b>                | 5.14 (3.24, 7.40)    | 27.61 (17.38, 39.72) | 43.40 (27.65, 62.59) | 11.80 (7.54, 16.82)    | 63.35 (40.48, 90.33)    | 102.17 (57.85, 152.97)  |
| <b>Tajikistan</b>           | 2.03 (1.29, 2.92)    | 23.91 (15.12, 34.36) | 42.03 (26.52, 59.98) | 5.11 (3.56, 6.86)      | 60.10 (41.84, 80.63)    | 75.56 (52.60, 101.68)   |
| <b>Tanzania</b>             | 9.90 (6.17, 14.29)   | 18.55 (11.56, 26.78) | 40.10 (25.68, 57.59) | 19.58 (13.68, 25.94)   | 36.68 (25.63, 48.61)    | 62.52 (43.89, 83.87)    |
| <b>Thailand</b>             | 19.46 (12.54, 27.84) | 28.66 (18.47, 41.01) | 24.40 (15.75, 34.46) | 100.91 (72.11, 129.44) | 148.63 (106.22, 190.66) | 123.20 (88.60, 158.83)  |
| <b>The Bahamas</b>          | 0.02 (0.02, 0.04)    | 6.44 (4.06, 9.24)    | 6.61 (4.24, 9.53)    | 0.14 (0.10, 0.18)      | 35.02 (24.58, 45.95)    | 34.98 (24.53, 46.16)    |
| <b>The Gambia</b>           | 0.49 (0.30, 0.70)    | 24.38 (15.15, 35.15) | 58.57 (36.46, 83.32) | 1.07 (0.72, 1.46)      | 53.54 (36.11, 73.20)    | 94.33 (64.94, 127.22)   |
| <b>Timor-Leste</b>          | 0.06 (0.04, 0.08)    | 4.88 (3.09, 7.11)    | 8.33 (5.23, 12.16)   | 0.26 (0.15, 0.38)      | 21.44 (12.65, 32.18)    | 33.00 (19.72, 49.20)    |
| <b>Togo</b>                 | 2.07 (1.31, 2.98)    | 28.36 (17.92, 40.75) | 56.83 (36.28, 81.33) | 4.67 (2.87, 6.81)      | 64.00 (39.31, 93.21)    | 101.35 (62.08, 148.63)  |
| <b>Tonga</b>                | 0.00 (0.00, 0.00)    | 0.00 (0.00, 0.00)    | 0.00 (0.00, 0.00)    | 0.00 (0.00, 0.00)      | 0.00 (0.00, 0.00)       | 0.00 (0.00, 0.00)       |
| <b>Trinidad and Tobago</b>  | 0.13 (0.09, 0.19)    | 9.87 (6.43, 14.19)   | 9.21 (5.95, 13.14)   | 0.66 (0.47, 0.86)      | 48.28 (34.29, 62.87)    | 43.77 (30.97, 56.85)    |
| <b>Tunisia</b>              | 5.07 (3.34, 7.12)    | 45.09 (29.67, 63.28) | 46.29 (30.89, 65.29) | 12.17 (7.73, 17.42)    | 108.15 (68.69, 154.83)  | 119.91 (75.89, 170.51)  |
| <b>Turkey</b>               | 45.45 (29.94, 63.66) | 57.96 (38.18, 81.17) | 61.97 (41.33, 87.17) | 57.26 (39.37, 77.22)   | 73.02 (50.20, 98.47)    | 81.84 (56.78, 110.38)   |
| <b>Turkmenistan</b>         | 1.83 (1.16, 2.62)    | 33.95 (21.59, 48.71) | 48.87 (30.36, 70.58) | 6.24 (4.59, 7.85)      | 115.93 (85.24, 145.79)  | 142.94 (104.59, 179.26) |
| <b>Uganda</b>               | 6.61 (4.18, 9.36)    | 16.88 (10.68, 23.90) | 43.89 (27.79, 62.74) | 13.81 (9.65, 18.39)    | 35.28 (24.65, 46.98)    | 68.61 (48.46, 90.65)    |
| <b>Ukraine</b>              | 7.71 (4.83, 11.11)   | 16.57 (10.39, 23.89) | 11.49 (7.25, 16.69)  | 7.50 (4.90, 10.53)     | 16.13 (10.54, 22.64)    | 12.08 (7.91, 17.11)     |
| <b>United Arab Emirates</b> | 3.57 (2.31, 5.03)    | 39.03 (25.29, 54.98) | 53.70 (34.58, 75.47) | 8.00 (4.68, 11.84)     | 87.50 (51.13, 129.41)   | 163.20 (100.84, 238.05) |
| <b>United Kingdom</b>       | 2.83 (1.83, 4.04)    | 4.41 (2.85, 6.29)    | 2.86 (1.84, 4.08)    | 3.50 (2.51, 4.47)      | 5.45 (3.90, 6.95)       | 3.25 (2.33, 4.16)       |

1  
2  
3  
4  
5  
6  
7  
8  
9  
10  
11  
12  
13  
14  
15  
16  
17  
18  
19  
20  
21  
22  
23  
24  
25  
26  
27  
28  
29  
30  
31  
32  
33  
34  
35  
36  
37  
38  
39  
40  
41  
42  
43  
44  
45  
46  
47

|                                                                   |                     |                      |                      |                       |                        |                         |
|-------------------------------------------------------------------|---------------------|----------------------|----------------------|-----------------------|------------------------|-------------------------|
| <b>United States</b>                                              | 0.00 (0.00, 0.00)   | 0.00 (0.00, 0.00)    | 0.00 (0.00, 0.00)    | 0.00 (0.00, 0.00)     | 0.00 (0.00, 0.00)      | 0.00 (0.00, 0.00)       |
| <b>Uruguay</b>                                                    | 0.13 (0.08, 0.19)   | 3.82 (2.45, 5.46)    | 2.89 (1.87, 4.11)    | 0.28 (0.20, 0.37)     | 8.20 (5.80, 10.65)     | 6.08 (4.30, 7.89)       |
| <b>Uzbekistan</b>                                                 | 8.33 (5.38, 11.72)  | 27.84 (17.96, 39.15) | 38.59 (24.71, 54.94) | 28.11 (20.38, 36.24)  | 93.89 (68.06, 121.04)  | 106.63 (77.03, 136.37)  |
| <b>Vanuatu</b>                                                    | 0.00 (0.00, 0.00)   | 0.00 (0.00, 0.00)    | 0.00 (0.00, 0.00)    | 0.00 (0.00, 0.00)     | 0.00 (0.00, 0.00)      | 0.00 (0.00, 0.00)       |
| <b>Venezuela</b>                                                  | 7.91 (5.20, 11.19)  | 25.44 (16.70, 35.98) | 31.92 (20.84, 45.23) | 40.84 (28.56, 54.04)  | 131.29 (91.82, 173.73) | 161.68 (113.49, 214.22) |
| <b>Vietnam</b>                                                    | 14.83 (9.73, 20.94) | 15.86 (10.41, 22.41) | 17.29 (11.43, 24.17) | 88.96 (63.22, 116.91) | 95.17 (67.64, 125.08)  | 105.85 (75.39, 138.02)  |
| <b>Virgin Islands, U.S.</b>                                       | 0.02 (0.01, 0.02)   | 15.19 (9.45, 22.03)  | 10.49 (6.59, 15.10)  | 0.08 (0.06, 0.11)     | 76.75 (53.39, 102.08)  | 51.16 (35.43, 68.56)    |
| <b>Yemen</b>                                                      | 7.74 (4.93, 11.13)  | 28.77 (18.33, 41.37) | 59.85 (38.83, 84.91) | 22.09 (13.44, 32.34)  | 82.07 (49.93, 120.17)  | 175.22 (107.99, 256.20) |
| <b>Zambia</b>                                                     | 3.18 (2.01, 4.54)   | 19.56 (12.36, 27.95) | 43.73 (27.72, 62.35) | 7.69 (5.13, 10.63)    | 47.32 (31.59, 65.40)   | 86.42 (57.46, 119.13)   |
| <b>Zimbabwe</b>                                                   | 3.53 (2.25, 5.09)   | 22.69 (14.45, 32.70) | 48.08 (30.43, 68.21) | 10.03 (6.54, 14.17)   | 64.40 (41.97, 90.99)   | 137.14 (89.08, 194.76)  |
| <b>Years living with disability, YLD; Years of life lost, YLL</b> |                     |                      |                      |                       |                        |                         |



## Checklist of information that should be included in new reports of global health estimates

| Item #                                                                                                | Checklist item                                                                                                                                                                                                                                                                                                                                                                            | Reported on page #                                       |
|-------------------------------------------------------------------------------------------------------|-------------------------------------------------------------------------------------------------------------------------------------------------------------------------------------------------------------------------------------------------------------------------------------------------------------------------------------------------------------------------------------------|----------------------------------------------------------|
| <b>Objectives and funding</b>                                                                         |                                                                                                                                                                                                                                                                                                                                                                                           |                                                          |
| 1                                                                                                     | Define the indicator(s), populations (including age, sex, and geographic entities), and time period(s) for which estimates were made.                                                                                                                                                                                                                                                     | Abstract, 3-4                                            |
| 2                                                                                                     | List the funding sources for the work.                                                                                                                                                                                                                                                                                                                                                    | 16                                                       |
| <b>Data Inputs</b>                                                                                    |                                                                                                                                                                                                                                                                                                                                                                                           |                                                          |
| <i>For all data inputs from multiple sources that are synthesized as part of the study:</i>           |                                                                                                                                                                                                                                                                                                                                                                                           |                                                          |
| 3                                                                                                     | Describe how the data were identified and how the data were accessed.                                                                                                                                                                                                                                                                                                                     | 3-4                                                      |
| 4                                                                                                     | Specify the inclusion and exclusion criteria. Identify all ad-hoc exclusions.                                                                                                                                                                                                                                                                                                             | 3-4                                                      |
| 5                                                                                                     | Provide information on all included data sources and their main characteristics. For each data source used, report reference information or contact name/institution, population represented, data collection method, year(s) of data collection, sex and age range, diagnostic criteria or measurement method, and sample size, as relevant.                                             | 3-4                                                      |
| 6                                                                                                     | Identify and describe any categories of input data that have potentially important biases (e.g., based on characteristics listed in item 5).                                                                                                                                                                                                                                              | 3-4, 14-15                                               |
| <i>For data inputs that contribute to the analysis but were not synthesized as part of the study:</i> |                                                                                                                                                                                                                                                                                                                                                                                           |                                                          |
| 7                                                                                                     | Describe and give sources for any other data inputs.                                                                                                                                                                                                                                                                                                                                      | 3-4                                                      |
| <i>For all data inputs:</i>                                                                           |                                                                                                                                                                                                                                                                                                                                                                                           |                                                          |
| 8                                                                                                     | Provide all data inputs in a file format from which data can be efficiently extracted (e.g., a spreadsheet rather than a PDF), including all relevant meta-data listed in item 5. For any data inputs that cannot be shared because of ethical or legal reasons, such as third-party ownership, provide a contact name or the name of the institution that retains the right to the data. | All data is publicly available. References are provided. |
| <b>Data analysis</b>                                                                                  |                                                                                                                                                                                                                                                                                                                                                                                           |                                                          |
| 9                                                                                                     | Provide a conceptual overview of the data analysis method. A diagram may be helpful.                                                                                                                                                                                                                                                                                                      | 7                                                        |
| 10                                                                                                    | Provide a detailed description of all steps of the analysis, including mathematical formulae. This description should cover, as relevant, data cleaning, data pre-processing, data adjustments and weighting of data sources, and mathematical or statistical model(s).                                                                                                                   | 4-8                                                      |
| 11                                                                                                    | Describe how candidate models were evaluated and how the final model(s) were selected.                                                                                                                                                                                                                                                                                                    | N/A                                                      |
| 12                                                                                                    | Provide the results of an evaluation of model performance, if done, as well as the results of any relevant sensitivity analysis.                                                                                                                                                                                                                                                          | N/A                                                      |
| 13                                                                                                    | Describe methods for calculating uncertainty of the estimates. State which sources of uncertainty were, and were not, accounted for in the uncertainty analysis.                                                                                                                                                                                                                          | 7                                                        |
| 14                                                                                                    | State how analytic or statistical source code used to generate estimates can be accessed.                                                                                                                                                                                                                                                                                                 | N/A                                                      |
| <b>Results and Discussion</b>                                                                         |                                                                                                                                                                                                                                                                                                                                                                                           |                                                          |
| 15                                                                                                    | Provide published estimates in a file format from which data can be efficiently extracted.                                                                                                                                                                                                                                                                                                | Supplemental table 1-5                                   |
| 16                                                                                                    | Report a quantitative measure of the uncertainty of the estimates (e.g. uncertainty intervals).                                                                                                                                                                                                                                                                                           | All estimates come with 95% Uncertainty Intervals        |
| 17                                                                                                    | Interpret results in light of existing evidence. If updating a previous set of estimates, describe the reasons for changes in estimates.                                                                                                                                                                                                                                                  | 12-15                                                    |

1  
2  
3  
4  
5  
6  
7  
8  
9  
10  
11  
12  
13  
14  
15  
16  
17  
18  
19  
20  
21  
22  
23  
24  
25  
26  
27  
28  
29  
30  
31  
32  
33  
34  
35  
36  
37  
38  
39  
40  
41  
42  
43  
44  
45  
46  
47  
48  
49  
50  
51  
52  
53  
54  
55  
56  
57  
58  
59  
60

|           |                                                                                                                                                          |       |
|-----------|----------------------------------------------------------------------------------------------------------------------------------------------------------|-------|
| <b>18</b> | Discuss limitations of the estimates. Include a discussion of any modelling assumptions or data limitations that affect interpretation of the estimates. | 15-16 |
|-----------|----------------------------------------------------------------------------------------------------------------------------------------------------------|-------|

*This checklist should be used in conjunction with the GATHER statement and Explanation and Elaboration document, found on [gather-statement.org](http://gather-statement.org)*

For peer review only
