# Supplementary material for: Estimates of the 2016 global burden of kidney disease attributable to ambient fine particulate matter air pollution
Source: PubMed Central journal article supplement — BMJ Open. 2019 May 9;9(5):e022450. doi: 10.1136/bmjopen-2018-022450 (PMC6528010; doi:10.1136/bmjopen-2018-022450), 2019-05-09
Supplement: bmjopen-2018-022450supp001.pdf [file bmjopen-2018-022450supp001.pdf]

**Supplemental Material:**

**Supplemental table 1:** Country characteristics and attributable burden of incident chronic kidney disease attributable to PM<sub>2.5</sub>

| Country                    | Population (in 100,000s) | PM <sub>2.5</sub> (µg/m <sup>3</sup> ) | ABD (in 1000s)                | ABD (per 100,000)       | Age Standardized ABD (per 100,000) |
|----------------------------|--------------------------|----------------------------------------|-------------------------------|-------------------------|------------------------------------|
| <b>Global</b>              | 73710.68                 | 42.27353                               | 6,950.51 (5,061.53, 8,914.74) | 94.29 (68.67, 120.94)   | 101.39 (74.49, 129.69)             |
| <b>Afghanistan</b>         | 326.08                   | 46.1                                   | 30.62 (22.13, 39.33)          | 93.91 (67.87, 120.62)   | 191.88 (138.69, 250.09)            |
| <b>Albania</b>             | 28.96                    | 17.1                                   | 1.65 (1.17, 2.18)             | 56.86 (40.23, 75.34)    | 46.27 (32.73, 60.97)               |
| <b>Algeria</b>             | 396.35                   | 30.9                                   | 46.28 (33.81, 59.58)          | 116.77 (85.31, 150.32)  | 148.29 (108.18, 191.08)            |
| <b>American Samoa</b>      | 0.83                     | 3.7                                    | 0.00 (0.00, 0.00)             | 0.00 (0.00, 5.89)       | 0.00 (0.00, 10.24)                 |
| <b>Andorra</b>             | 0.79                     | 9.7                                    | 0.03 (0.02, 0.04)             | 33.65 (20.56, 51.06)    | 18.26 (11.18, 27.50)               |
| <b>Angola</b>              | 252.51                   | 29.1                                   | 18.63 (13.45, 23.93)          | 73.78 (53.28, 94.77)    | 167.03 (120.40, 218.54)            |
| <b>Antigua and Barbuda</b> | 0.92                     | 12.8                                   | 0.05 (0.03, 0.07)             | 52.16 (35.28, 72.37)    | 56.86 (38.55, 78.89)               |
| <b>Argentina</b>           | 434.13                   | 13                                     | 25.33 (17.07, 35.06)          | 58.35 (39.31, 80.76)    | 54.36 (37.06, 75.23)               |
| <b>Armenia</b>             | 30.08                    | 21.2                                   | 5.14 (3.62, 6.79)             | 170.82 (120.49, 225.62) | 146.08 (104.36, 192.99)            |
| <b>Australia</b>           | 243.22                   | 5.8                                    | 3.00 (0.00, 6.77)             | 12.32 (0.00, 27.83)     | 8.58 (0.00, 19.34)                 |
| <b>Austria</b>             | 86.70                    | 16.7                                   | 8.46 (5.94, 11.25)            | 97.63 (68.55, 129.71)   | 55.12 (38.79, 72.98)               |
| <b>Azerbaijan</b>          | 97.82                    | 25.6                                   | 13.61 (9.72, 17.82)           | 139.17 (99.35, 182.22)  | 162.21 (116.83, 212.80)            |
| <b>Bahrain</b>             | 13.67                    | 54.4                                   | 1.18 (0.86, 1.53)             | 86.54 (62.67, 112.18)   | 134.55 (97.69, 173.40)             |
| <b>Bangladesh</b>          | 1609.58                  | 87                                     | 136.17 (99.56, 174.46)        | 84.60 (61.86, 108.39)   | 121.08 (88.55, 156.18)             |
| <b>Barbados</b>            | 2.84                     | 14.1                                   | 0.23 (0.16, 0.31)             | 80.43 (55.70, 110.22)   | 58.71 (40.65, 79.70)               |
| <b>Belarus</b>             | 96.12                    | 17.9                                   | 12.27 (8.63, 16.39)           | 127.67 (89.75, 170.57)  | 90.45 (63.46, 120.31)              |
| <b>Belgium</b>             | 113.33                   | 15.3                                   | 8.55 (5.98, 11.60)            | 75.47 (52.75, 102.36)   | 43.74 (30.54, 59.11)               |
| <b>Belize</b>              | 3.59                     | 23.2                                   | 0.25 (0.18, 0.32)             | 69.68 (50.71, 89.18)    | 119.56 (86.74, 154.56)             |

|                                 |          |      |                         |                         |                         |
|---------------------------------|----------|------|-------------------------|-------------------------|-------------------------|
| <b>Benin</b>                    | 109.14   | 29.1 | 13.03 (9.45, 16.83)     | 119.42 (86.55, 154.23)  | 221.80 (158.67, 288.49) |
| <b>Bermuda</b>                  | 0.67     | 8.5  | 0.02 (0.01, 0.03)       | 23.70 (13.38, 37.60)    | 24.27 (13.58, 38.49)    |
| <b>Bhutan</b>                   | 7.75     | 54.1 | 0.63 (0.46, 0.81)       | 81.62 (59.15, 105.14)   | 117.58 (85.02, 151.93)  |
| <b>Bolivia</b>                  | 107.67   | 27.1 | 7.88 (5.73, 10.12)      | 73.15 (53.26, 93.97)    | 103.87 (75.28, 133.54)  |
| <b>Bosnia and Herzegovina</b>   | 38.11    | 45.3 | 3.47 (2.50, 4.50)       | 91.07 (65.52, 118.05)   | 61.29 (44.32, 79.04)    |
| <b>Botswana</b>                 | 22.59    | 15.4 | 2.05 (1.42, 2.76)       | 90.88 (62.78, 122.29)   | 141.70 (98.19, 191.81)  |
| <b>Brazil</b>                   | 2078.47  | 11.1 | 69.03 (45.11, 99.44)    | 33.21 (21.70, 47.84)    | 36.57 (23.68, 52.72)    |
| <b>Brunei</b>                   | 4.23     | 5    | 0.01 (0.00, 0.05)       | 3.42 (0.00, 11.43)      | 5.19 (0.00, 17.16)      |
| <b>Bulgaria</b>                 | 72.68    | 27.5 | 7.64 (5.50, 9.91)       | 105.13 (75.64, 136.35)  | 62.62 (45.69, 80.52)    |
| <b>Burkina Faso</b>             | 180.94   | 33.6 | 18.04 (13.04, 23.17)    | 99.72 (72.06, 128.05)   | 207.57 (150.31, 269.84) |
| <b>Burundi</b>                  | 112.47   | 37.1 | 9.66 (7.00, 12.41)      | 85.85 (62.26, 110.31)   | 177.62 (128.26, 231.63) |
| <b>Cambodia</b>                 | 155.92   | 23.9 | 5.78 (4.23, 7.39)       | 37.07 (27.10, 47.42)    | 56.89 (41.44, 72.76)    |
| <b>Cameroon</b>                 | 234.01   | 64   | 24.23 (17.60, 31.15)    | 103.53 (75.22, 133.13)  | 198.36 (144.84, 256.55) |
| <b>Canada</b>                   | 361.46   | 7    | 8.34 (3.40, 15.08)      | 23.07 (9.40, 41.72)     | 15.02 (6.10, 27.17)     |
| <b>Cape Verde</b>               | 5.20     | 35.2 | 0.75 (0.54, 0.96)       | 143.34 (104.72, 184.95) | 214.86 (154.68, 277.73) |
| <b>Central African Republic</b> | 49.03    | 38.3 | 4.79 (3.47, 6.14)       | 97.60 (70.67, 125.21)   | 171.43 (124.31, 223.21) |
| <b>Chad</b>                     | 140.63   | 39.6 | 14.46 (10.50, 18.54)    | 102.83 (74.64, 131.86)  | 220.58 (157.76, 287.17) |
| <b>Chile</b>                    | 179.48   | 20.6 | 18.72 (13.36, 24.39)    | 104.29 (74.42, 135.90)  | 91.45 (65.70, 118.71)   |
| <b>China</b>                    | 13834.71 | 57.2 | 766.73 (558.72, 985.14) | 55.42 (40.39, 71.21)    | 48.98 (35.52, 63.01)    |
| <b>Colombia</b>                 | 482.64   | 17.6 | 49.09 (34.74, 65.16)    | 101.71 (71.98, 135.00)  | 116.74 (82.49, 155.15)  |
| <b>Comoros</b>                  | 7.92     | 16.1 | 0.50 (0.35, 0.67)       | 63.64 (44.53, 84.92)    | 117.38 (81.93, 157.82)  |
| <b>Congo</b>                    | 46.29    | 42.3 | 4.48 (3.28, 5.75)       | 96.77 (70.88, 124.13)   | 176.51 (127.77, 229.52) |
| <b>Costa Rica</b>               | 48.09    | 19.7 | 6.86 (4.89, 9.01)       | 142.69 (101.73, 187.28) | 143.54 (102.27, 187.39) |

|                                         |        |      |                        |                         |                         |
|-----------------------------------------|--------|------|------------------------|-------------------------|-------------------------|
| <b>Cote d'Ivoire</b>                    | 226.88 | 19.8 | 26.91 (19.33, 35.11)   | 118.62 (85.19, 154.73)  | 214.13 (152.49, 280.67) |
| <b>Croatia</b>                          | 42.41  | 21.2 | 4.09 (2.91, 5.35)      | 96.50 (68.56, 126.11)   | 57.30 (41.40, 74.38)    |
| <b>Cuba</b>                             | 113.93 | 16.4 | 8.51 (5.99, 11.35)     | 74.69 (52.60, 99.60)    | 54.54 (38.26, 72.87)    |
| <b>Cyprus</b>                           | 8.92   | 17.9 | 0.75 (0.52, 0.99)      | 83.56 (58.73, 111.25)   | 61.89 (43.91, 82.30)    |
| <b>Czech Republic</b>                   | 106.97 | 21   | 9.13 (6.57, 11.84)     | 85.32 (61.46, 110.71)   | 53.89 (39.00, 69.54)    |
| <b>Democratic Republic of the Congo</b> | 774.14 | 38.7 | 59.51 (43.52, 76.68)   | 76.87 (56.22, 99.06)    | 160.32 (115.41, 208.74) |
| <b>Denmark</b>                          | 57.11  | 10.7 | 2.62 (1.68, 3.83)      | 45.79 (29.35, 67.00)    | 27.06 (17.47, 39.28)    |
| <b>Djibouti</b>                         | 8.90   | 39.1 | 0.90 (0.65, 1.16)      | 101.59 (73.49, 130.67)  | 168.86 (121.39, 218.42) |
| <b>Dominica</b>                         | 0.72   | 12.5 | 0.04 (0.03, 0.06)      | 58.81 (39.96, 82.15)    | 60.71 (41.15, 84.09)    |
| <b>Dominican Republic</b>               | 105.30 | 18.3 | 6.27 (4.47, 8.19)      | 59.57 (42.47, 77.75)    | 75.11 (53.80, 98.40)    |
| <b>Ecuador</b>                          | 161.54 | 12.5 | 6.81 (4.60, 9.48)      | 42.14 (28.51, 58.65)    | 54.52 (36.79, 75.88)    |
| <b>Egypt</b>                            | 911.48 | 99.5 | 115.58 (84.09, 148.52) | 126.81 (92.26, 162.95)  | 172.28 (124.99, 221.03) |
| <b>El Salvador</b>                      | 61.37  | 35.5 | 12.72 (9.33, 16.10)    | 207.27 (152.01, 262.25) | 243.44 (178.28, 309.30) |
| <b>Equatorial Guinea</b>                | 8.45   | 34   | 0.88 (0.63, 1.15)      | 103.85 (74.40, 135.90)  | 168.82 (121.56, 218.53) |
| <b>Eritrea</b>                          | 52.42  | 35.3 | 4.44 (3.22, 5.72)      | 84.61 (61.49, 109.10)   | 174.25 (125.86, 225.66) |
| <b>Estonia</b>                          | 13.54  | 9.1  | 1.00 (0.58, 1.55)      | 73.50 (42.99, 114.07)   | 44.54 (26.14, 69.71)    |
| <b>Ethiopia</b>                         | 994.32 | 30.1 | 91.51 (66.04, 117.62)  | 92.04 (66.42, 118.29)   | 175.10 (126.30, 227.38) |
| <b>Federated States of Micronesia</b>   | 1.05   | 6.1  | 0.01 (0.00, 0.02)      | 9.86 (1.48, 20.72)      | 15.19 (2.27, 31.50)     |
| <b>Fiji</b>                             | 8.92   | 6    | 0.12 (0.01, 0.26)      | 13.54 (1.36, 29.07)     | 16.03 (1.64, 34.27)     |
| <b>Finland</b>                          | 55.50  | 7.2  | 1.05 (0.46, 1.85)      | 19.00 (8.29, 33.37)     | 10.38 (4.56, 18.38)     |
| <b>France</b>                           | 652.32 | 12.1 | 33.11 (21.98, 46.89)   | 50.76 (33.69, 71.89)    | 28.24 (18.87, 39.78)    |
| <b>Gabon</b>                            | 17.26  | 31.3 | 1.82 (1.32, 2.34)      | 105.61 (76.30, 135.79)  | 168.43 (121.79, 218.50) |
| <b>Georgia</b>                          | 40.04  | 19.7 | 6.69 (4.78, 8.74)      | 167.15 (119.41, 218.39) | 132.27 (93.99, 172.71)  |
| <b>Germany</b>                          | 836.28 | 13.7 | 70.93 (47.89, 98.80)   | 84.82 (57.26, 118.14)   | 42.05 (28.94, 57.72)    |

|                      |          |      |                             |                         |                         |
|----------------------|----------|------|-----------------------------|-------------------------|-------------------------|
| <b>Ghana</b>         | 274.17   | 21.7 | 35.82 (26.00, 46.10)        | 130.65 (94.84, 168.16)  | 219.77 (158.78, 286.91) |
| <b>Greece</b>        | 109.22   | 13.2 | 8.16 (5.53, 11.34)          | 74.69 (50.68, 103.84)   | 38.26 (26.00, 52.72)    |
| <b>Greenland</b>     | 0.54     | 5.2  | 0.00 (0.00, 0.01)           | 5.33 (0.00, 15.58)      | 6.07 (0.00, 17.59)      |
| <b>Grenada</b>       | 1.07     | 14   | 0.06 (0.04, 0.08)           | 58.26 (40.14, 79.38)    | 70.08 (47.80, 96.05)    |
| <b>Guam</b>          | 1.70     | 6.8  | 0.03 (0.01, 0.05)           | 15.82 (5.83, 29.24)     | 16.30 (5.94, 29.82)     |
| <b>Guatemala</b>     | 163.55   | 33.9 | 19.67 (14.34, 25.39)        | 120.29 (87.70, 155.27)  | 209.74 (152.42, 272.81) |
| <b>Guinea</b>        | 125.74   | 19.3 | 13.72 (9.81, 17.89)         | 109.14 (78.05, 142.26)  | 195.33 (139.44, 258.00) |
| <b>Guinea-Bissau</b> | 18.48    | 26   | 2.72 (1.98, 3.50)           | 147.24 (107.14, 189.25) | 253.89 (183.23, 327.77) |
| <b>Guyana</b>        | 7.70     | 14.8 | 0.42 (0.29, 0.57)           | 54.46 (37.90, 73.60)    | 69.92 (48.64, 94.71)    |
| <b>Haiti</b>         | 107.21   | 22.1 | 7.40 (5.39, 9.51)           | 69.04 (50.28, 88.68)    | 112.63 (81.88, 145.09)  |
| <b>Honduras</b>      | 80.96    | 36.2 | 9.80 (7.08, 12.66)          | 120.98 (87.47, 156.34)  | 201.06 (144.40, 263.01) |
| <b>Hungary</b>       | 101.68   | 22.6 | 9.99 (7.20, 12.89)          | 98.26 (70.81, 126.78)   | 60.80 (44.16, 78.35)    |
| <b>Iceland</b>       | 3.26     | 7.5  | 0.05 (0.02, 0.09)           | 15.35 (7.31, 26.30)     | 11.32 (5.40, 19.37)     |
| <b>India</b>         | 13116.32 | 72.6 | 1,092.52 (791.38, 1,407.28) | 83.30 (60.34, 107.29)   | 108.21 (77.99, 139.22)  |
| <b>Indonesia</b>     | 2576.21  | 15   | 76.81 (53.66, 103.42)       | 29.81 (20.83, 40.15)    | 37.38 (26.05, 50.06)    |
| <b>Iran</b>          | 790.34   | 42   | 91.01 (65.99, 117.28)       | 115.16 (83.50, 148.39)  | 149.19 (108.02, 191.81) |
| <b>Iraq</b>          | 364.21   | 45.2 | 34.71 (25.24, 44.66)        | 95.31 (69.31, 122.62)   | 188.02 (137.00, 243.23) |
| <b>Ireland</b>       | 47.90    | 9.6  | 1.35 (0.83, 2.04)           | 28.24 (17.35, 42.64)    | 21.79 (13.38, 32.85)    |
| <b>Israel</b>        | 80.49    | 20.7 | 7.79 (5.61, 10.15)          | 96.73 (69.68, 126.13)   | 87.85 (62.89, 113.70)   |
| <b>Italy</b>         | 627.97   | 19.5 | 72.58 (51.77, 95.43)        | 115.58 (82.44, 151.96)  | 56.46 (40.37, 73.98)    |
| <b>Jamaica</b>       | 28.30    | 16.6 | 2.02 (1.43, 2.69)           | 71.31 (50.64, 94.92)    | 75.34 (53.45, 100.21)   |
| <b>Japan</b>         | 1283.06  | 13.1 | 134.56 (91.13, 186.81)      | 104.88 (71.03, 145.60)  | 44.79 (30.61, 61.70)    |
| <b>Jordan</b>        | 75.71    | 38   | 6.94 (5.06, 8.91)           | 91.72 (66.84, 117.67)   | 158.36 (114.70, 206.05) |

|                         |         |      |                         |                         |                         |
|-------------------------|---------|------|-------------------------|-------------------------|-------------------------|
| <b>Kazakhstan</b>       | 175.37  | 17   | 18.92 (13.23, 25.33)    | 107.86 (75.47, 144.46)  | 125.62 (88.13, 168.39)  |
| <b>Kenya</b>            | 461.90  | 15.6 | 22.91 (16.02, 30.63)    | 49.61 (34.68, 66.30)    | 99.34 (69.68, 134.28)   |
| <b>Kiribati</b>         | 1.13    | 3.4  | 0.00 (0.00, 0.01)       | 0.00 (0.00, 4.53)       | 0.00 (0.00, 7.19)       |
| <b>Kuwait</b>           | 39.01   | 65.7 | 2.99 (2.16, 3.87)       | 76.55 (55.33, 99.19)    | 128.44 (93.49, 165.90)  |
| <b>Kyrgyzstan</b>       | 58.94   | 16.1 | 4.19 (2.93, 5.63)       | 71.15 (49.79, 95.51)    | 103.57 (72.70, 139.25)  |
| <b>Laos</b>             | 67.99   | 27.9 | 2.60 (1.90, 3.30)       | 38.18 (27.97, 48.59)    | 64.96 (47.36, 83.09)    |
| <b>Latvia</b>           | 22.12   | 19.8 | 4.22 (2.98, 5.57)       | 190.58 (134.74, 251.78) | 114.09 (81.29, 150.57)  |
| <b>Lebanon</b>          | 57.62   | 31.8 | 6.04 (4.39, 7.77)       | 104.81 (76.23, 134.81)  | 112.01 (81.21, 144.48)  |
| <b>Lesotho</b>          | 21.29   | 18.6 | 2.38 (1.69, 3.13)       | 111.68 (79.43, 146.90)  | 195.68 (137.71, 258.63) |
| <b>Liberia</b>          | 45.08   | 7.4  | 1.17 (0.54, 2.03)       | 25.96 (12.07, 44.95)    | 46.88 (21.90, 81.55)    |
| <b>Libya</b>            | 62.95   | 69.4 | 6.90 (5.00, 8.86)       | 109.60 (79.50, 140.70)  | 149.84 (107.92, 192.76) |
| <b>Lithuania</b>        | 31.53   | 18.6 | 4.98 (3.52, 6.62)       | 157.85 (111.58, 209.91) | 96.99 (68.86, 127.38)   |
| <b>Luxembourg</b>       | 5.56    | 16.2 | 0.37 (0.26, 0.49)       | 65.91 (46.31, 88.37)    | 46.84 (32.97, 62.57)    |
| <b>Macedonia</b>        | 20.78   | 39.4 | 1.59 (1.15, 2.05)       | 76.57 (55.11, 98.54)    | 60.24 (43.70, 77.65)    |
| <b>Madagascar</b>       | 241.92  | 18.7 | 16.14 (11.53, 21.02)    | 66.71 (47.66, 86.88)    | 129.22 (91.66, 171.24)  |
| <b>Malawi</b>           | 172.14  | 21.4 | 12.44 (9.00, 16.02)     | 72.25 (52.30, 93.06)    | 155.47 (111.87, 203.05) |
| <b>Malaysia</b>         | 302.96  | 15.1 | 9.37 (6.58, 12.70)      | 30.91 (21.73, 41.93)    | 38.23 (26.77, 51.34)    |
| <b>Maldives</b>         | 3.63    | 28.5 | 0.16 (0.12, 0.21)       | 44.47 (32.46, 56.71)    | 65.13 (47.34, 82.98)    |
| <b>Mali</b>             | 175.68  | 37.2 | 17.90 (13.06, 22.97)    | 101.91 (74.36, 130.73)  | 215.28 (154.81, 278.99) |
| <b>Malta</b>            | 4.18    | 15.4 | 0.35 (0.24, 0.47)       | 83.52 (57.98, 113.42)   | 48.42 (33.48, 65.19)    |
| <b>Marshall Islands</b> | 0.72    | 9.1  | 0.02 (0.01, 0.03)       | 27.01 (16.13, 41.20)    | 46.11 (27.31, 71.02)    |
| <b>Mauritania</b>       | 40.85   | 68.5 | 5.39 (3.89, 6.93)       | 131.84 (95.23, 169.69)  | 221.28 (159.05, 287.45) |
| <b>Mauritius</b>        | 12.74   | 14.4 | 0.95 (0.66, 1.28)       | 74.40 (51.72, 100.81)   | 64.63 (44.84, 86.96)    |
| <b>Mexico</b>           | 1270.43 | 19.7 | 205.87 (147.95, 269.30) | 162.05 (116.46, 211.98) | 206.44 (147.97, 269.37) |
| <b>Moldova</b>          | 40.65   | 16.7 | 3.99 (2.77, 5.36)       | 98.14 (68.25, 131.75)   | 82.08 (57.78, 110.01)   |

|                                 |         |      |                         |                         |                         |
|---------------------------------|---------|------|-------------------------|-------------------------|-------------------------|
| <b>Mongolia</b>                 | 29.53   | 22.9 | 3.53 (2.55, 4.58)       | 119.47 (86.18, 155.07)  | 182.35 (130.58, 237.33) |
| <b>Montenegro</b>               | 6.26    | 22.7 | 0.57 (0.41, 0.74)       | 91.15 (65.81, 118.31)   | 68.28 (49.58, 88.70)    |
| <b>Morocco</b>                  | 343.73  | 22.4 | 28.75 (20.79, 37.13)    | 83.65 (60.47, 108.03)   | 97.08 (70.31, 125.02)   |
| <b>Mozambique</b>               | 279.91  | 17   | 18.20 (12.87, 24.04)    | 65.02 (45.96, 85.87)    | 130.12 (91.54, 172.57)  |
| <b>Myanmar</b>                  | 540.27  | 53   | 28.44 (20.70, 36.47)    | 52.64 (38.32, 67.51)    | 65.80 (47.73, 84.55)    |
| <b>Namibia</b>                  | 24.53   | 18.6 | 2.10 (1.50, 2.76)       | 85.72 (61.13, 112.35)   | 147.88 (104.50, 196.98) |
| <b>Nepal</b>                    | 285.51  | 70.9 | 33.03 (23.92, 42.72)    | 115.68 (83.79, 149.62)  | 163.61 (118.20, 211.43) |
| <b>Netherlands</b>              | 171.91  | 14.3 | 9.73 (6.73, 13.38)      | 56.63 (39.12, 77.82)    | 33.72 (23.31, 46.04)    |
| <b>New Zealand</b>              | 45.63   | 5.4  | 0.45 (0.00, 1.16)       | 9.76 (0.00, 25.40)      | 6.86 (0.00, 17.63)      |
| <b>Nicaragua</b>                | 60.89   | 23   | 8.80 (6.38, 11.37)      | 144.51 (104.85, 186.69) | 212.72 (153.46, 276.70) |
| <b>Niger</b>                    | 198.54  | 53   | 20.96 (15.19, 27.02)    | 105.56 (76.52, 136.07)  | 215.31 (154.91, 278.75) |
| <b>Nigeria</b>                  | 1824.90 | 36.9 | 195.23 (141.44, 250.95) | 106.98 (77.51, 137.52)  | 200.28 (145.24, 261.20) |
| <b>North Korea</b>              | 251.59  | 27.7 | 15.12 (10.90, 19.59)    | 60.11 (43.32, 77.88)    | 61.34 (44.58, 78.87)    |
| <b>Northern Mariana Islands</b> | 1.16    | 11.3 | 0.02 (0.02, 0.03)       | 20.67 (13.49, 29.40)    | 47.95 (31.41, 68.33)    |
| <b>Norway</b>                   | 51.64   | 8.9  | 1.11 (0.65, 1.74)       | 21.54 (12.50, 33.61)    | 13.87 (8.09, 21.62)     |
| <b>Oman</b>                     | 44.81   | 46.7 | 3.36 (2.44, 4.29)       | 74.90 (54.42, 95.71)    | 131.54 (95.01, 170.75)  |
| <b>Pakistan</b>                 | 1890.55 | 63   | 107.43 (78.85, 137.04)  | 56.83 (41.71, 72.49)    | 89.17 (64.66, 114.14)   |
| <b>Palestine</b>                | 46.73   | 20.1 | 3.83 (2.75, 4.94)       | 81.87 (58.75, 105.74)   | 165.02 (118.93, 215.20) |
| <b>Panama</b>                   | 39.29   | 12.6 | 2.89 (1.94, 4.05)       | 73.68 (49.45, 103.06)   | 85.49 (57.25, 120.64)   |
| <b>Papua New Guinea</b>         | 76.33   | 10.4 | 1.86 (1.19, 2.72)       | 24.39 (15.57, 35.63)    | 43.51 (27.83, 63.68)    |
| <b>Paraguay</b>                 | 66.53   | 14.3 | 2.90 (1.99, 3.95)       | 43.61 (29.95, 59.33)    | 61.17 (41.81, 82.87)    |
| <b>Peru</b>                     | 313.93  | 27.1 | 19.31 (14.05, 24.91)    | 61.52 (44.75, 79.35)    | 79.54 (57.72, 103.29)   |
| <b>Philippines</b>              | 1008.03 | 22.8 | 54.04 (39.68, 68.69)    | 53.61 (39.36, 68.14)    | 74.76 (54.64, 94.99)    |
| <b>Poland</b>                   | 389.13  | 23.8 | 40.53 (29.17, 52.81)    | 104.15 (74.95, 135.72)  | 70.38 (51.26, 90.87)    |
| <b>Portugal</b>                 | 108.00  | 9.5  | 3.85 (2.33, 5.84)       | 35.69 (21.59, 54.08)    | 18.78 (11.47, 28.35)    |

|                                         |         |       |                         |                         |                         |
|-----------------------------------------|---------|-------|-------------------------|-------------------------|-------------------------|
| <b>Puerto Rico</b>                      | 36.84   | 16.7  | 3.73 (2.64, 4.96)       | 101.27 (71.69, 134.66)  | 76.26 (53.86, 101.30)   |
| <b>Qatar</b>                            | 22.21   | 104.2 | 1.46 (1.06, 1.89)       | 65.88 (47.52, 84.97)    | 128.63 (92.66, 166.35)  |
| <b>Romania</b>                          | 195.27  | 19.2  | 15.83 (11.38, 20.56)    | 81.06 (58.28, 105.29)   | 51.90 (37.43, 67.35)    |
| <b>Russia</b>                           | 1481.18 | 15.8  | 170.89 (118.90, 229.76) | 115.38 (80.27, 155.12)  | 82.87 (57.99, 111.67)   |
| <b>Rwanda</b>                           | 116.31  | 41.3  | 8.71 (6.31, 11.23)      | 74.88 (54.22, 96.59)    | 151.70 (109.39, 196.85) |
| <b>Saint Lucia</b>                      | 1.85    | 13.1  | 0.11 (0.07, 0.15)       | 57.56 (39.30, 79.12)    | 57.71 (39.45, 80.03)    |
| <b>Saint Vincent and the Grenadines</b> | 1.10    | 13.2  | 0.06 (0.04, 0.08)       | 54.25 (36.90, 74.94)    | 60.38 (40.98, 83.45)    |
| <b>Samoa</b>                            | 1.94    | 3.7   | 0.00 (0.00, 0.01)       | 0.00 (0.00, 6.72)       | 0.00 (0.00, 10.11)      |
| <b>Sao Tome and Principe</b>            | 1.91    | 12.6  | 0.15 (0.10, 0.21)       | 80.10 (54.07, 111.56)   | 150.88 (101.15, 210.56) |
| <b>Saudi Arabia</b>                     | 314.35  | 102.9 | 30.70 (22.09, 39.58)    | 97.66 (70.26, 125.92)   | 150.52 (109.32, 194.82) |
| <b>Senegal</b>                          | 151.09  | 36.4  | 18.32 (13.34, 23.49)    | 121.23 (88.29, 155.47)  | 232.28 (166.70, 300.78) |
| <b>Serbia</b>                           | 88.56   | 20.8  | 6.93 (4.96, 9.08)       | 78.30 (56.00, 102.53)   | 50.81 (36.59, 66.12)    |
| <b>Seychelles</b>                       | 0.97    | 12.7  | 0.03 (0.02, 0.04)       | 32.68 (22.05, 45.29)    | 34.25 (23.23, 47.29)    |
| <b>Sierra Leone</b>                     | 64.62   | 15    | 5.21 (3.60, 7.02)       | 80.61 (55.73, 108.68)   | 150.18 (103.40, 203.74) |
| <b>Singapore</b>                        | 39.24   | 17.7  | 2.96 (2.09, 3.91)       | 75.44 (53.39, 99.60)    | 60.15 (42.54, 79.62)    |
| <b>Slovakia</b>                         | 55.55   | 20.1  | 4.34 (3.10, 5.65)       | 78.13 (55.88, 101.78)   | 56.44 (40.57, 73.37)    |
| <b>Slovenia</b>                         | 20.63   | 19.9  | 1.58 (1.12, 2.06)       | 76.60 (54.28, 99.90)    | 45.64 (32.80, 59.31)    |
| <b>Solomon Islands</b>                  | 5.86    | 5.2   | 0.03 (0.00, 0.08)       | 4.78 (0.00, 13.86)      | 8.83 (0.00, 25.48)      |
| <b>Somalia</b>                          | 108.49  | 16.7  | 7.39 (5.20, 9.81)       | 68.15 (47.95, 90.38)    | 133.98 (93.74, 179.48)  |
| <b>South Africa</b>                     | 537.24  | 28.9  | 83.45 (60.96, 107.82)   | 155.34 (113.48, 200.68) | 203.05 (146.97, 262.13) |
| <b>South Korea</b>                      | 502.83  | 28.1  | 42.98 (31.24, 55.16)    | 85.48 (62.13, 109.71)   | 62.81 (46.10, 80.28)    |
| <b>South Sudan</b>                      | 122.88  | 28.4  | 10.34 (7.48, 13.34)     | 84.15 (60.87, 108.54)   | 168.75 (121.86, 219.39) |
| <b>Spain</b>                            | 487.51  | 9.6   | 28.19 (17.24, 42.67)    | 57.82 (35.37, 87.52)    | 33.08 (20.25, 49.77)    |
| <b>Sri Lanka</b>                        | 207.48  | 26.4  | 13.44 (9.77, 17.25)     | 64.80 (47.07, 83.15)    | 62.19 (45.41, 79.45)    |

|                             |         |      |                         |                         |                         |
|-----------------------------|---------|------|-------------------------|-------------------------|-------------------------|
| <b>Sudan</b>                | 403.89  | 42.3 | 36.09 (26.23, 46.46)    | 89.36 (64.93, 115.04)   | 156.64 (112.55, 203.44) |
| <b>Suriname</b>             | 5.43    | 15.2 | 0.36 (0.25, 0.48)       | 66.06 (46.23, 88.46)    | 77.26 (53.87, 103.80)   |
| <b>Swaziland</b>            | 12.89   | 17.8 | 1.29 (0.90, 1.70)       | 99.81 (70.16, 131.93)   | 186.40 (131.74, 247.70) |
| <b>Sweden</b>               | 98.08   | 6.1  | 1.23 (0.18, 2.60)       | 12.55 (1.88, 26.47)     | 6.94 (1.03, 14.50)      |
| <b>Switzerland</b>          | 82.78   | 12.6 | 6.43 (4.30, 9.01)       | 77.64 (52.00, 108.88)   | 46.31 (30.85, 64.65)    |
| <b>Syria</b>                | 186.22  | 35.8 | 14.88 (10.81, 19.15)    | 79.89 (58.04, 102.85)   | 125.13 (90.21, 162.01)  |
| <b>Tajikistan</b>           | 85.01   | 41.3 | 6.87 (4.95, 8.91)       | 80.82 (58.28, 104.85)   | 145.74 (105.87, 189.20) |
| <b>Tanzania</b>             | 533.73  | 22   | 41.03 (29.90, 52.63)    | 76.87 (56.01, 98.61)    | 155.44 (112.27, 201.32) |
| <b>Thailand</b>             | 678.94  | 25.8 | 62.03 (45.04, 80.16)    | 91.36 (66.34, 118.07)   | 75.85 (55.19, 97.24)    |
| <b>The Bahamas</b>          | 3.87    | 12.6 | 0.20 (0.14, 0.28)       | 52.86 (35.40, 73.21)    | 54.03 (36.14, 75.68)    |
| <b>The Gambia</b>           | 20.01   | 39.7 | 2.00 (1.46, 2.59)       | 100.04 (72.77, 129.46)  | 214.82 (154.65, 277.45) |
| <b>Timor-Leste</b>          | 11.90   | 14.4 | 0.25 (0.18, 0.34)       | 21.32 (14.75, 28.69)    | 34.59 (23.89, 47.05)    |
| <b>Togo</b>                 | 73.03   | 26   | 9.06 (6.57, 11.67)      | 124.04 (89.92, 159.87)  | 227.28 (163.83, 296.75) |
| <b>Tonga</b>                | 1.07    | 3.9  | 0.00 (0.00, 0.01)       | 0.00 (0.00, 7.65)       | 0.00 (0.00, 11.18)      |
| <b>Trinidad and Tobago</b>  | 13.61   | 13.1 | 0.90 (0.61, 1.25)       | 66.18 (45.16, 91.60)    | 60.51 (41.36, 83.84)    |
| <b>Tunisia</b>              | 112.50  | 43.2 | 15.05 (10.93, 19.50)    | 133.82 (97.17, 173.35)  | 138.75 (101.14, 179.30) |
| <b>Turkey</b>               | 784.20  | 35.6 | 149.34 (107.89, 193.37) | 190.43 (137.58, 246.58) | 205.17 (148.13, 266.16) |
| <b>Turkmenistan</b>         | 53.81   | 26.7 | 6.22 (4.49, 8.05)       | 115.65 (83.43, 149.66)  | 173.38 (124.34, 226.28) |
| <b>Uganda</b>               | 391.54  | 57.2 | 26.34 (19.22, 33.74)    | 67.28 (49.09, 86.17)    | 162.19 (117.55, 209.23) |
| <b>Ukraine</b>              | 465.08  | 16.6 | 54.40 (38.42, 73.05)    | 116.97 (82.62, 157.08)  | 78.57 (55.29, 104.13)   |
| <b>United Arab Emirates</b> | 91.45   | 62.2 | 8.16 (5.89, 10.57)      | 89.24 (64.42, 115.58)   | 144.84 (104.05, 188.05) |
| <b>United Kingdom</b>       | 642.44  | 12.2 | 31.84 (21.27, 44.66)    | 49.56 (33.11, 69.52)    | 29.94 (19.98, 42.00)    |
| <b>United States</b>        | 3235.26 | 8.3  | 163.49 (88.76, 262.78)  | 50.53 (27.44, 81.22)    | 35.44 (19.39, 57.44)    |



|                                                                                                   |        |      |                      |                         |                         |
|---------------------------------------------------------------------------------------------------|--------|------|----------------------|-------------------------|-------------------------|
| <b>Uruguay</b>                                                                                    | 34.34  | 11.2 | 1.77 (1.14, 2.56)    | 51.47 (33.33, 74.66)    | 37.80 (24.60, 54.33)    |
| <b>Uzbekistan</b>                                                                                 | 299.41 | 33   | 30.79 (22.37, 39.65) | 102.83 (74.72, 132.42)  | 146.64 (105.09, 191.81) |
| <b>Vanuatu</b>                                                                                    | 2.63   | 6.5  | 0.03 (0.01, 0.05)    | 10.23 (2.99, 19.72)     | 16.78 (4.91, 32.33)     |
| <b>Venezuela</b>                                                                                  | 311.06 | 22.9 | 44.63 (31.94, 58.05) | 143.49 (102.69, 186.63) | 182.63 (131.66, 238.12) |
| <b>Vietnam</b>                                                                                    | 934.72 | 27.3 | 38.83 (28.20, 49.94) | 41.54 (30.17, 53.43)    | 46.79 (33.92, 60.31)    |
| <b>Virgin Islands, U.S.</b>                                                                       | 1.07   | 14.7 | 0.11 (0.07, 0.14)    | 99.44 (68.13, 135.33)   | 63.79 (43.94, 86.41)    |
| <b>Yemen</b>                                                                                      | 269.12 | 40.7 | 22.21 (16.22, 28.54) | 82.52 (60.27, 106.07)   | 166.16 (119.22, 215.67) |
| <b>Zambia</b>                                                                                     | 162.49 | 23.4 | 13.68 (9.94, 17.47)  | 84.19 (61.17, 107.53)   | 183.65 (132.13, 236.56) |
| <b>Zimbabwe</b>                                                                                   | 155.74 | 19.8 | 15.52 (11.18, 20.24) | 99.68 (71.79, 129.93)   | 213.77 (152.75, 280.65) |
| <b>PM<sub>2.5</sub>, Fine particulate matter &lt;2.5 µm; ABD, Attributable burden of disease;</b> |        |      |                      |                         |                         |

**Supplemental Table 2:** Years living with disability (YLD), years of life lost (YLL), and disability adjusted life years (DALY) of chronic kidney disease associated with PM<sub>2.5</sub>.

| Country                    | YLD<br>(in 1000s)                   | YLD<br>(per<br>100,000)    | Age<br>Standardized<br>YLD (per<br>100,000) | YLL<br>(in 1000s)                    | YLL<br>(per<br>100,000)       | Age<br>Standardized<br>YLL<br>(per 100,000) | DALY<br>(in 1000s)                    | DALY<br>(per<br>100,000)      | Age<br>Standardized<br>DALY<br>(per 100,000) |
|----------------------------|-------------------------------------|----------------------------|---------------------------------------------|--------------------------------------|-------------------------------|---------------------------------------------|---------------------------------------|-------------------------------|----------------------------------------------|
| <b>Global</b>              | 2,849.31<br>(1,875.22,<br>3,983.94) | 38.66<br>(25.44,<br>54.05) | 40.97 (26.84,<br>57.11)                     | 8,587.74<br>(6,355.78,<br>10,772.24) | 116.51<br>(86.23,<br>146.14)  | 122.71 (90.36,<br>153.52)                   | 11,445.40<br>(8,380.25,<br>14,554.09) | 155.27<br>(113.69,<br>197.45) | 163.69<br>(120.58,<br>207.28)                |
| <b>Afghanistan</b>         | 15.78<br>(10.35,<br>22.35)          | 48.39<br>(31.75,<br>68.53) | 100.93 (66.66,<br>141.17)                   | 80.86<br>(51.35,<br>116.20)          | 247.97<br>(157.47,<br>356.37) | 516.25<br>(326.37,<br>739.27)               | 96.28<br>(62.90,<br>135.20)           | 295.27<br>(192.91,<br>414.63) | 616.34<br>(408.20,<br>867.27)                |
| <b>Albania</b>             | 0.60 (0.38,<br>0.88)                | 20.80<br>(13.17,<br>30.22) | 17.31 (10.99,<br>24.97)                     | 2.11 (1.44,<br>2.90)                 | 72.97<br>(49.85,<br>100.23)   | 62.69 (43.29,<br>85.74)                     | 2.72 (1.90,<br>3.64)                  | 93.81<br>(65.63,<br>125.67)   | 80.29 (56.13,<br>106.33)                     |
| <b>Algeria</b>             | 22.93<br>(15.02,<br>32.26)          | 57.86<br>(37.91,<br>81.39) | 71.02 (46.64,<br>100.31)                    | 47.83<br>(33.27,<br>63.95)           | 120.68<br>(83.95,<br>161.35)  | 162.94<br>(114.17,<br>217.27)               | 71.00<br>(50.72,<br>92.82)            | 179.14<br>(127.96,<br>234.19) | 233.92<br>(169.67,<br>305.79)                |
| <b>American Samoa</b>      | 0.00 (0.00,<br>0.00)                | 0.00 (0.00,<br>3.32)       | 0.00 (0.00,<br>5.20)                        | 0.00 (0.00,<br>0.02)                 | 0.00 (0.00,<br>20.43)         | 0.00 (0.00,<br>33.64)                       | 0.00 (0.00,<br>0.02)                  | 0.00 (0.00,<br>23.78)         | 0.00 (0.00,<br>38.44)                        |
| <b>Andorra</b>             | 0.01 (0.00,<br>0.01)                | 10.42<br>(5.95,<br>16.83)  | 6.17 (3.51,<br>9.97)                        | 0.01 (0.00,<br>0.02)                 | 11.03<br>(5.28,<br>19.50)     | 5.94 (2.91,<br>10.55)                       | 0.02 (0.01,<br>0.03)                  | 21.70<br>(12.68,<br>34.27)    | 12.19 (7.19,<br>19.18)                       |
| <b>Angola</b>              | 6.58 (4.23,<br>9.46)                | 26.04<br>(16.74,<br>37.48) | 63.19 (40.50,<br>90.77)                     | 11.30<br>(6.78,<br>16.55)            | 44.76<br>(26.84,<br>65.53)    | 87.56 (52.33,<br>129.83)                    | 17.89<br>(12.24,<br>24.49)            | 70.84<br>(48.47,<br>96.97)    | 151.41<br>(104.04,<br>206.44)                |
| <b>Antigua and Barbuda</b> | 0.02 (0.01,<br>0.03)                | 21.07<br>(12.92,<br>31.63) | 22.64 (13.72,<br>34.35)                     | 0.09 (0.06,<br>0.12)                 | 93.37<br>(63.19,<br>130.16)   | 96.98 (65.92,<br>135.53)                    | 0.11 (0.07,<br>0.15)                  | 114.57<br>(77.87,<br>158.29)  | 119.87 (81.10,<br>165.54)                    |
| <b>Argentina</b>           | 10.35<br>(6.52,<br>15.41)           | 23.84<br>(15.02,<br>35.50) | 22.48 (14.23,<br>33.23)                     | 30.57<br>(21.14,<br>41.92)           | 70.43<br>(48.68,<br>96.56)    | 66.09 (45.14,<br>89.95)                     | 41.06<br>(28.15,<br>56.10)            | 94.58<br>(64.84,<br>129.21)   | 88.69 (60.91,<br>121.56)                     |
| <b>Armenia</b>             | 1.92 (1.24,<br>2.74)                | 63.93<br>(41.29,<br>91.25) | 54.32 (35.15,<br>77.48)                     | 2.24 (1.63,<br>2.88)                 | 74.53<br>(54.20,<br>95.72)    | 63.70 (46.31,<br>82.02)                     | 4.17 (2.99,<br>5.45)                  | 138.60<br>(99.27,<br>181.15)  | 118.22 (84.68,<br>154.97)                    |
| <b>Australia</b>           | 0.77 (0.00,<br>1.83)                | 3.17 (0.00,<br>7.54)       | 2.32 (0.00,<br>5.55)                        | 1.51 (0.00,<br>3.37)                 | 6.20 (0.00,<br>13.85)         | 4.11 (0.00,<br>9.20)                        | 2.29 (0.00,<br>5.11)                  | 9.43 (0.00,<br>20.99)         | 6.46 (0.00,<br>14.49)                        |

|                               |                      |                      |                       |                         |                         |                         |                         |                         |                         |
|-------------------------------|----------------------|----------------------|-----------------------|-------------------------|-------------------------|-------------------------|-------------------------|-------------------------|-------------------------|
| <b>Austria</b>                | 2.43 (1.56, 3.50)    | 28.07 (18.02, 40.36) | 16.95 (10.82, 24.67)  | 5.78 (4.12, 7.53)       | 66.71 (47.51, 86.83)    | 35.45 (25.30, 46.46)    | 8.22 (5.88, 10.81)      | 94.85 (67.87, 124.73)   | 52.55 (37.32, 69.02)    |
| <b>Azerbaijan</b>             | 4.67 (2.99, 6.64)    | 47.71 (30.59, 67.91) | 55.28 (35.35, 78.77)  | 10.89 (7.49, 14.76)     | 111.29 (76.59, 150.90)  | 118.28 (82.85, 158.67)  | 15.58 (11.18, 20.48)    | 159.25 (114.27, 209.40) | 173.98 (124.03, 226.28) |
| <b>Bahrain</b>                | 0.63 (0.40, 0.90)    | 46.21 (29.50, 65.98) | 63.69 (42.15, 88.70)  | 1.11 (0.75, 1.54)       | 81.34 (54.67, 112.79)   | 170.51 (112.78, 236.54) | 1.75 (1.23, 2.35)       | 128.14 (89.87, 171.95)  | 234.56 (165.09, 315.29) |
| <b>Bangladesh</b>             | 51.45 (33.04, 72.84) | 31.96 (20.53, 45.25) | 45.58 (28.89, 64.56)  | 168.36 (121.18, 220.47) | 104.60 (75.28, 136.98)  | 137.57 (98.14, 179.69)  | 220.26 (159.56, 283.60) | 136.84 (99.13, 176.20)  | 183.21 (132.76, 236.87) |
| <b>Barbados</b>               | 0.09 (0.05, 0.13)    | 30.39 (18.92, 44.96) | 22.88 (14.36, 33.90)  | 0.33 (0.23, 0.44)       | 115.22 (79.33, 156.08)  | 87.72 (60.74, 118.85)   | 0.41 (0.29, 0.56)       | 145.83 (101.20, 197.33) | 110.85 (76.61, 149.60)  |
| <b>Belarus</b>                | 3.20 (2.00, 4.70)    | 33.32 (20.76, 48.92) | 24.00 (15.01, 35.08)  | 3.21 (2.24, 4.31)       | 33.40 (23.28, 44.86)    | 25.13 (17.48, 33.86)    | 6.42 (4.43, 8.71)       | 66.78 (46.09, 90.63)    | 49.26 (34.10, 66.80)    |
| <b>Belgium</b>                | 2.59 (1.65, 3.76)    | 22.87 (14.56, 33.19) | 14.18 (9.15, 20.36)   | 4.60 (3.24, 6.15)       | 40.62 (28.56, 54.26)    | 21.68 (15.18, 28.86)    | 7.22 (5.04, 9.69)       | 63.75 (44.46, 85.52)    | 35.87 (25.02, 48.10)    |
| <b>Belize</b>                 | 0.10 (0.07, 0.15)    | 29.01 (18.88, 41.13) | 46.41 (29.68, 66.35)  | 0.69 (0.49, 0.91)       | 193.45 (137.33, 254.42) | 309.79 (222.58, 406.03) | 0.80 (0.57, 1.04)       | 222.65 (158.81, 289.88) | 356.94 (258.16, 462.43) |
| <b>Benin</b>                  | 4.31 (2.74, 6.20)    | 39.46 (25.10, 56.81) | 81.61 (52.77, 115.92) | 11.87 (8.18, 16.18)     | 108.76 (74.96, 148.28)  | 172.70 (119.54, 235.01) | 16.26 (11.35, 21.77)    | 148.96 (103.96, 199.48) | 254.04 (178.36, 337.96) |
| <b>Bermuda</b>                | 0.01 (0.00, 0.01)    | 8.40 (4.35, 14.40)   | 8.49 (4.43, 14.75)    | 0.02 (0.01, 0.03)       | 27.68 (15.47, 44.04)    | 28.16 (15.76, 45.10)    | 0.02 (0.01, 0.04)       | 36.12 (20.32, 57.30)    | 36.76 (20.69, 57.92)    |
| <b>Bhutan</b>                 | 0.29 (0.18, 0.41)    | 36.78 (23.66, 52.34) | 52.27 (33.89, 74.69)  | 0.97 (0.62, 1.38)       | 124.89 (79.46, 178.30)  | 168.36 (110.65, 236.69) | 1.25 (0.85, 1.72)       | 161.48 (110.05, 221.36) | 220.68 (151.58, 301.63) |
| <b>Bolivia</b>                | 2.99 (1.94, 4.24)    | 27.82 (18.01, 39.39) | 38.53 (24.81, 54.96)  | 22.30 (14.92, 30.93)    | 207.09 (138.57, 287.29) | 277.03 (182.00, 385.54) | 25.39 (17.43, 34.41)    | 235.85 (161.92, 319.63) | 316.08 (216.87, 431.03) |
| <b>Bosnia and Herzegovina</b> | 1.82 (1.19, 2.58)    | 47.73 (31.24, 67.59) | 32.51 (21.31, 45.52)  | 3.76 (2.67, 5.00)       | 98.66 (70.11, 131.12)   | 67.09 (47.63, 88.75)    | 5.60 (4.02, 7.28)       | 146.96 (105.54, 190.98) | 100.14 (71.90, 129.83)  |

|                                 |                      |                      |                       |                       |                        |                         |                        |                         |                         |
|---------------------------------|----------------------|----------------------|-----------------------|-----------------------|------------------------|-------------------------|------------------------|-------------------------|-------------------------|
| <b>Botswana</b>                 | 0.68 (0.43, 0.98)    | 29.90 (18.95, 43.55) | 48.07 (30.04, 70.85)  | 1.37 (0.63, 2.34)     | 60.71 (27.85, 103.76)  | 102.33 (50.74, 168.91)  | 2.06 (1.20, 3.16)      | 91.07 (52.95, 140.05)   | 151.38 (90.43, 229.77)  |
| <b>Brazil</b>                   | 25.72 (15.29, 39.59) | 12.38 (7.36, 19.05)  | 13.55 (8.11, 20.94)   | 98.88 (65.54, 139.27) | 47.57 (31.53, 67.01)   | 51.17 (34.05, 72.01)    | 124.85 (82.57, 176.65) | 60.07 (39.72, 84.99)    | 64.76 (42.92, 91.88)    |
| <b>Brunei</b>                   | 0.01 (0.00, 0.03)    | 2.32 (0.00, 8.04)    | 2.98 (0.00, 10.53)    | 0.02 (0.00, 0.08)     | 5.56 (0.00, 19.31)     | 7.87 (0.00, 26.63)      | 0.03 (0.00, 0.11)      | 8.00 (0.00, 26.61)      | 10.86 (0.00, 36.48)     |
| <b>Bulgaria</b>                 | 3.47 (2.17, 5.03)    | 47.72 (29.91, 69.20) | 28.59 (18.30, 40.81)  | 8.72 (6.17, 11.52)    | 119.92 (84.89, 158.48) | 77.27 (54.61, 101.87)   | 12.22 (8.79, 15.95)    | 168.11 (120.88, 219.44) | 105.94 (76.14, 137.65)  |
| <b>Burkina Faso</b>             | 6.04 (3.81, 8.75)    | 33.40 (21.06, 48.37) | 78.10 (49.95, 110.78) | 11.88 (8.40, 15.80)   | 65.65 (46.41, 87.30)   | 112.79 (81.92, 144.36)  | 17.97 (12.84, 23.59)   | 99.29 (70.95, 130.37)   | 190.49 (136.55, 249.99) |
| <b>Burundi</b>                  | 3.20 (1.98, 4.65)    | 28.44 (17.61, 41.35) | 62.45 (39.54, 90.32)  | 5.52 (3.77, 7.56)     | 49.05 (33.49, 67.22)   | 86.58 (59.04, 118.33)   | 8.74 (6.21, 11.58)     | 77.67 (55.23, 103.00)   | 149.74 (105.20, 198.10) |
| <b>Cambodia</b>                 | 2.75 (1.77, 3.94)    | 17.66 (11.35, 25.25) | 27.66 (18.20, 39.32)  | 17.78 (12.87, 22.99)  | 114.06 (82.52, 147.46) | 166.02 (120.34, 213.75) | 20.53 (14.88, 26.32)   | 131.69 (95.45, 168.79)  | 194.04 (141.21, 248.37) |
| <b>Cameroon</b>                 | 8.06 (5.11, 11.66)   | 34.44 (21.84, 49.84) | 69.42 (44.47, 100.23) | 29.37 (17.73, 42.92)  | 125.51 (75.78, 183.42) | 185.46 (113.23, 271.03) | 37.47 (25.06, 52.43)   | 160.13 (107.09, 224.05) | 255.04 (167.04, 356.67) |
| <b>Canada</b>                   | 2.63 (1.03, 5.03)    | 7.27 (2.84, 13.91)   | 5.09 (1.98, 9.77)     | 3.88 (1.58, 6.92)     | 10.73 (4.38, 19.14)    | 7.01 (2.86, 12.42)      | 6.55 (2.66, 11.74)     | 18.13 (7.35, 32.48)     | 12.13 (4.95, 21.82)     |
| <b>Cape Verde</b>               | 0.27 (0.18, 0.38)    | 52.09 (33.73, 73.89) | 77.90 (50.53, 111.43) | 0.51 (0.36, 0.68)     | 97.36 (69.06, 129.77)  | 132.17 (93.71, 175.24)  | 0.78 (0.56, 1.02)      | 150.01 (107.45, 196.66) | 210.82 (149.30, 276.52) |
| <b>Central African Republic</b> | 1.80 (1.17, 2.56)    | 36.68 (23.76, 52.20) | 68.27 (43.92, 97.19)  | 3.93 (2.61, 5.41)     | 80.08 (53.30, 110.29)  | 122.68 (82.91, 169.24)  | 5.73 (4.04, 7.62)      | 116.92 (82.30, 155.41)  | 191.79 (133.62, 256.75) |
| <b>Chad</b>                     | 5.12 (3.23, 7.36)    | 36.39 (22.95, 52.30) | 86.75 (54.15, 124.91) | 17.38 (12.11, 23.42)  | 123.61 (86.12, 166.54) | 177.23 (123.76, 236.45) | 22.54 (15.88, 29.84)   | 160.28 (112.95, 212.21) | 264.19 (189.32, 345.78) |
| <b>Chile</b>                    | 8.52 (5.63, 11.92)   | 47.46 (31.36, 66.43) | 41.42 (27.66, 57.65)  | 18.06 (12.01, 25.06)  | 100.60 (66.93, 139.64) | 87.97 (58.58, 122.97)   | 26.54 (18.38, 35.82)   | 147.86 (102.41, 199.56) | 129.54 (90.05, 175.32)  |

|                                         |                               |                            |                          |                                   |                              |                               |                                     |                               |                               |
|-----------------------------------------|-------------------------------|----------------------------|--------------------------|-----------------------------------|------------------------------|-------------------------------|-------------------------------------|-------------------------------|-------------------------------|
| <b>China</b>                            | 462.21<br>(304.57,<br>647.27) | 33.41<br>(22.01,<br>46.79) | 29.12 (19.36,<br>41.01)  | 1,188.22<br>(870.96,<br>1,501.83) | 85.89<br>(62.95,<br>108.56)  | 76.18 (55.93,<br>96.49)       | 1,651.72<br>(1,212.35,<br>2,103.21) | 119.39<br>(87.63,<br>152.02)  | 105.79 (77.30,<br>133.98)     |
| <b>Colombia</b>                         | 14.77<br>(9.60,<br>20.92)     | 30.61<br>(19.89,<br>43.34) | 34.79 (22.95,<br>49.73)  | 37.69<br>(26.69,<br>49.38)        | 78.08<br>(55.30,<br>102.32)  | 92.36 (65.62,<br>121.19)      | 52.45<br>(37.36,<br>68.94)          | 108.66<br>(77.41,<br>142.84)  | 127.67 (90.79,<br>167.02)     |
| <b>Comoros</b>                          | 0.20 (0.12,<br>0.30)          | 25.43<br>(15.55,<br>37.83) | 48.98 (29.85,<br>73.12)  | 0.25 (0.13,<br>0.39)              | 31.35<br>(17.02,<br>49.22)   | 53.86 (29.18,<br>84.89)       | 0.45 (0.29,<br>0.65)                | 56.76<br>(36.33,<br>81.83)    | 103.08 (66.46,<br>149.18)     |
| <b>Congo</b>                            | 1.55 (0.99,<br>2.20)          | 33.48<br>(21.39,<br>47.46) | 64.04 (41.27,<br>91.07)  | 2.68 (1.76,<br>3.74)              | 57.90<br>(37.97,<br>80.80)   | 100.69 (65.77,<br>141.75)     | 4.24 (2.96,<br>5.74)                | 91.63<br>(64.03,<br>124.09)   | 165.95<br>(114.47,<br>222.62) |
| <b>Costa Rica</b>                       | 1.89 (1.22,<br>2.73)          | 39.40<br>(25.33,<br>56.70) | 39.80 (25.50,<br>56.91)  | 6.49 (4.71,<br>8.39)              | 135.03<br>(98.02,<br>174.38) | 134.89 (97.43,<br>173.03)     | 8.41 (6.10,<br>10.78)               | 174.83<br>(126.80,<br>224.09) | 174.96<br>(126.88,<br>224.74) |
| <b>Cote d'Ivoire</b>                    | 9.08 (5.68,<br>13.15)         | 40.03<br>(25.06,<br>57.97) | 80.94 (51.84,<br>116.88) | 28.27<br>(19.14,<br>39.04)        | 124.62<br>(84.34,<br>172.07) | 189.00<br>(123.69,<br>267.47) | 37.33<br>(25.50,<br>50.49)          | 164.53<br>(112.41,<br>222.56) | 270.82<br>(185.31,<br>369.24) |
| <b>Croatia</b>                          | 1.65 (1.08,<br>2.34)          | 38.87<br>(25.48,<br>55.06) | 23.65 (15.44,<br>33.25)  | 3.34 (2.40,<br>4.33)              | 78.73<br>(56.70,<br>102.04)  | 45.03 (32.47,<br>58.44)       | 5.00 (3.62,<br>6.45)                | 117.81<br>(85.44,<br>152.10)  | 69.03 (49.85,<br>88.95)       |
| <b>Cuba</b>                             | 3.17 (1.99,<br>4.63)          | 27.81<br>(17.47,<br>40.61) | 20.49 (12.69,<br>30.35)  | 10.25<br>(7.29,<br>13.57)         | 89.95<br>(64.00,<br>119.09)  | 66.97 (47.68,<br>88.27)       | 13.45<br>(9.50,<br>17.70)           | 118.07<br>(83.42,<br>155.38)  | 87.58 (62.19,<br>115.61)      |
| <b>Cyprus</b>                           | 0.21 (0.14,<br>0.31)          | 23.91<br>(15.14,<br>34.44) | 18.20 (11.76,<br>25.83)  | 0.75 (0.54,<br>0.97)              | 83.82<br>(60.07,<br>109.09)  | 60.21 (43.24,<br>78.34)       | 0.96 (0.69,<br>1.25)                | 107.87<br>(77.36,<br>140.64)  | 78.41 (56.11,<br>102.22)      |
| <b>Czech Republic</b>                   | 4.25 (2.78,<br>6.04)          | 39.71<br>(25.97,<br>56.42) | 25.71 (16.53,<br>36.59)  | 5.56 (4.07,<br>7.07)              | 51.94<br>(38.09,<br>66.06)   | 32.97 (23.97,<br>41.68)       | 9.83 (7.04,<br>12.77)               | 91.86<br>(65.78,<br>119.39)   | 58.62 (42.45,<br>76.24)       |
| <b>Democratic Republic of the Congo</b> | 22.52<br>(14.70,<br>32.09)    | 29.09<br>(18.99,<br>41.45) | 65.38 (42.42,<br>93.03)  | 33.70<br>(24.05,<br>44.53)        | 43.53<br>(31.07,<br>57.52)   | 78.20 (56.21,<br>102.14)      | 56.66<br>(40.43,<br>73.73)          | 73.19<br>(52.22,<br>95.24)    | 143.94<br>(103.26,<br>188.29) |
| <b>Denmark</b>                          | 0.77 (0.46,<br>1.20)          | 13.52<br>(8.13,<br>21.05)  | 8.77 (5.30,<br>13.74)    | 1.38 (0.88,<br>2.00)              | 24.11<br>(15.44,<br>35.11)   | 14.49 (9.35,<br>21.05)        | 2.15 (1.39,<br>3.13)                | 37.71<br>(24.36,<br>54.78)    | 23.27 (15.13,<br>33.81)       |
| <b>Djibouti</b>                         | 0.35 (0.22,<br>0.51)          | 39.75<br>(24.97,<br>57.53) | 69.42 (43.27,<br>101.69) | 0.52 (0.33,<br>0.74)              | 58.06<br>(36.69,<br>83.43)   | 89.00 (55.89,<br>128.33)      | 0.87 (0.60,<br>1.19)                | 98.28<br>(67.04,<br>134.22)   | 159.20<br>(108.66,<br>216.60) |

|                                       |                      |                      |                       |                        |                         |                         |                         |                         |                         |
|---------------------------------------|----------------------|----------------------|-----------------------|------------------------|-------------------------|-------------------------|-------------------------|-------------------------|-------------------------|
| <b>Dominica</b>                       | 0.02 (0.01, 0.03)    | 26.78 (16.28, 40.41) | 27.20 (16.63, 41.41)  | 0.10 (0.07, 0.14)      | 141.01 (94.20, 198.43)  | 143.39 (95.78, 200.98)  | 0.12 (0.08, 0.17)       | 167.77 (112.89, 233.81) | 170.57 (114.74, 238.15) |
| <b>Dominican Republic</b>             | 2.16 (1.40, 3.11)    | 20.51 (13.32, 29.56) | 25.21 (16.27, 35.79)  | 10.27 (7.12, 13.78)    | 97.53 (67.59, 130.86)   | 118.26 (82.48, 158.03)  | 12.44 (8.72, 16.50)     | 118.16 (82.83, 156.69)  | 143.44 (101.14, 190.86) |
| <b>Ecuador</b>                        | 2.15 (1.32, 3.26)    | 13.29 (8.20, 20.16)  | 16.47 (10.07, 24.94)  | 16.18 (11.08, 22.31)   | 100.15 (68.60, 138.10)  | 125.41 (85.32, 172.37)  | 18.39 (12.51, 25.26)    | 113.87 (77.43, 156.40)  | 142.20 (96.35, 195.11)  |
| <b>Egypt</b>                          | 52.26 (33.82, 73.90) | 57.34 (37.10, 81.08) | 78.38 (52.19, 109.64) | 120.03 (72.90, 175.32) | 131.68 (79.98, 192.35)  | 195.21 (113.70, 292.81) | 172.30 (117.78, 234.75) | 189.03 (129.21, 257.55) | 273.55 (184.84, 379.35) |
| <b>El Salvador</b>                    | 3.28 (2.17, 4.57)    | 53.49 (35.35, 74.39) | 60.54 (40.91, 83.89)  | 26.18 (18.78, 34.28)   | 426.58 (306.06, 558.61) | 481.81 (344.35, 636.50) | 29.52 (21.20, 38.63)    | 481.04 (345.36, 629.37) | 543.35 (391.16, 707.96) |
| <b>Equatorial Guinea</b>              | 0.31 (0.19, 0.44)    | 36.10 (22.80, 52.06) | 62.82 (40.97, 89.68)  | 0.33 (0.14, 0.55)      | 38.67 (16.27, 65.19)    | 65.43 (28.59, 107.37)   | 0.63 (0.40, 0.91)       | 74.72 (47.43, 107.66)   | 127.91 (82.09, 182.20)  |
| <b>Eritrea</b>                        | 1.58 (0.99, 2.26)    | 30.15 (18.84, 43.18) | 65.72 (41.77, 93.78)  | 2.55 (1.72, 3.51)      | 48.56 (32.81, 67.03)    | 90.41 (61.56, 124.00)   | 4.13 (2.84, 5.58)       | 78.70 (54.27, 106.42)   | 156.58 (109.12, 209.90) |
| <b>Estonia</b>                        | 0.24 (0.13, 0.40)    | 17.52 (9.40, 29.47)  | 10.53 (5.71, 17.73)   | 0.34 (0.20, 0.52)      | 24.98 (14.95, 38.24)    | 15.18 (9.06, 23.36)     | 0.58 (0.34, 0.90)       | 42.69 (25.13, 66.20)    | 25.83 (15.22, 40.11)    |
| <b>Ethiopia</b>                       | 33.19 (20.80, 48.02) | 33.38 (20.92, 48.29) | 67.59 (42.14, 98.96)  | 61.22 (42.68, 81.87)   | 61.57 (42.92, 82.34)    | 109.74 (76.89, 145.84)  | 94.59 (67.19, 125.41)   | 95.13 (67.58, 126.13)   | 177.87 (126.42, 234.11) |
| <b>Federated States of Micronesia</b> | 0.01 (0.00, 0.01)    | 5.15 (0.78, 11.55)   | 8.30 (1.23, 18.33)    | 0.05 (0.01, 0.11)      | 46.55 (6.82, 106.75)    | 71.82 (10.73, 165.71)   | 0.05 (0.01, 0.12)       | 51.60 (7.54, 116.80)    | 80.06 (12.05, 181.25)   |
| <b>Fiji</b>                           | 0.06 (0.01, 0.14)    | 7.08 (0.72, 16.13)   | 8.44 (0.86, 19.52)    | 0.49 (0.05, 1.10)      | 54.64 (5.58, 123.55)    | 65.44 (6.46, 147.66)    | 0.55 (0.06, 1.23)       | 61.67 (6.29, 138.03)    | 74.23 (7.50, 164.95)    |
| <b>Finland</b>                        | 0.31 (0.13, 0.58)    | 5.53 (2.29, 10.37)   | 3.37 (1.42, 6.32)     | 0.34 (0.15, 0.59)      | 6.04 (2.65, 10.58)      | 3.25 (1.44, 5.68)       | 0.64 (0.28, 1.14)       | 11.62 (5.04, 20.51)     | 6.67 (2.90, 11.83)      |
| <b>France</b>                         | 10.91 (6.80, 16.24)  | 16.72 (10.42, 24.90) | 10.33 (6.46, 15.54)   | 14.82 (9.99, 20.53)    | 22.72 (15.32, 31.47)    | 11.56 (7.81, 16.04)     | 25.74 (17.27, 36.09)    | 39.46 (26.48, 55.32)    | 21.98 (14.45, 30.75)    |

|                      |                      |                      |                       |                      |                         |                         |                      |                         |                         |
|----------------------|----------------------|----------------------|-----------------------|----------------------|-------------------------|-------------------------|----------------------|-------------------------|-------------------------|
| <b>Gabon</b>         | 0.69 (0.44, 0.98)    | 39.84 (25.74, 56.59) | 64.43 (41.20, 92.46)  | 1.17 (0.73, 1.69)    | 67.89 (42.35, 97.63)    | 103.47 (65.94, 149.30)  | 1.86 (1.28, 2.56)    | 107.89 (74.10, 148.39)  | 169.15 (115.23, 230.82) |
| <b>Georgia</b>       | 2.79 (1.81, 3.99)    | 69.57 (45.09, 99.58) | 52.95 (34.74, 74.84)  | 5.47 (3.95, 7.07)    | 136.67 (98.53, 176.53)  | 109.34 (78.72, 141.78)  | 8.05 (5.80, 10.42)   | 200.95 (144.82, 260.11) | 162.56 (116.39, 211.01) |
| <b>Germany</b>       | 19.37 (12.08, 28.60) | 23.16 (14.45, 34.20) | 12.69 (7.91, 18.77)   | 48.60 (33.67, 65.68) | 58.12 (40.26, 78.54)    | 26.78 (18.63, 36.11)    | 68.11 (47.23, 92.79) | 81.44 (56.48, 110.96)   | 39.52 (27.20, 53.71)    |
| <b>Ghana</b>         | 12.42 (7.83, 17.85)  | 45.30 (28.55, 65.10) | 82.09 (52.28, 118.31) | 26.03 (18.42, 34.67) | 94.94 (67.17, 126.47)   | 138.80 (98.95, 184.52)  | 38.46 (27.42, 50.42) | 140.27 (100.00, 183.89) | 221.70 (158.31, 291.92) |
| <b>Greece</b>        | 2.82 (1.77, 4.15)    | 25.80 (16.19, 37.97) | 14.22 (8.94, 21.00)   | 6.41 (4.38, 8.70)    | 58.68 (40.11, 79.65)    | 28.23 (19.35, 38.55)    | 9.20 (6.34, 12.62)   | 84.26 (58.03, 115.54)   | 42.42 (29.20, 58.30)    |
| <b>Greenland</b>     | 0.00 (0.00, 0.00)    | 1.91 (0.00, 5.81)    | 2.03 (0.00, 6.25)     | 0.00 (0.00, 0.01)    | 3.06 (0.00, 9.34)       | 4.06 (0.00, 12.10)      | 0.00 (0.00, 0.01)    | 5.05 (0.00, 14.85)      | 6.15 (0.00, 17.97)      |
| <b>Grenada</b>       | 0.02 (0.02, 0.04)    | 23.18 (14.68, 34.33) | 26.83 (16.93, 39.22)  | 0.17 (0.12, 0.24)    | 160.25 (109.88, 220.44) | 185.70 (127.42, 254.62) | 0.20 (0.13, 0.27)    | 183.38 (126.10, 251.11) | 212.35 (146.51, 290.28) |
| <b>Guam</b>          | 0.01 (0.01, 0.03)    | 8.49 (3.03, 16.96)   | 8.90 (3.15, 17.49)    | 0.07 (0.02, 0.13)    | 40.18 (14.62, 75.40)    | 41.50 (15.03, 77.79)    | 0.08 (0.03, 0.15)    | 48.82 (18.00, 91.23)    | 50.69 (18.52, 93.78)    |
| <b>Guatemala</b>     | 6.58 (4.31, 9.27)    | 40.24 (26.36, 56.66) | 65.22 (42.57, 91.99)  | 36.15 (24.35, 49.98) | 221.02 (148.91, 305.60) | 341.33 (229.36, 470.47) | 42.67 (29.49, 58.10) | 260.90 (180.34, 355.27) | 408.41 (283.82, 551.84) |
| <b>Guinea</b>        | 4.63 (2.95, 6.69)    | 36.83 (23.43, 53.19) | 73.16 (46.42, 106.87) | 10.60 (7.03, 14.77)  | 84.34 (55.88, 117.44)   | 125.93 (84.04, 177.29)  | 15.23 (10.57, 20.72) | 121.16 (84.06, 164.80)  | 200.40 (138.47, 270.56) |
| <b>Guinea-Bissau</b> | 0.95 (0.60, 1.37)    | 51.12 (32.31, 73.94) | 97.52 (61.55, 140.52) | 3.07 (2.11, 4.18)    | 166.22 (114.18, 226.05) | 250.33 (172.32, 341.15) | 4.02 (2.82, 5.40)    | 217.69 (152.81, 291.96) | 349.02 (246.22, 463.93) |
| <b>Guyana</b>        | 0.16 (0.10, 0.23)    | 20.60 (12.92, 30.36) | 27.16 (17.08, 40.05)  | 1.07 (0.74, 1.45)    | 138.67 (96.10, 188.24)  | 166.74 (115.79, 224.82) | 1.23 (0.85, 1.66)    | 159.32 (110.51, 215.69) | 193.49 (134.96, 260.32) |
| <b>Haiti</b>         | 3.11 (1.99, 4.46)    | 28.98 (18.58, 41.56) | 46.35 (30.15, 65.93)  | 21.89 (13.72, 31.56) | 204.22 (127.98, 294.35) | 288.82 (178.97, 421.19) | 24.97 (16.35, 35.18) | 232.93 (152.48, 328.10) | 336.51 (221.79, 469.96) |



|                  |                               |                            |                           |                                     |                               |                               |                                     |                               |                               |
|------------------|-------------------------------|----------------------------|---------------------------|-------------------------------------|-------------------------------|-------------------------------|-------------------------------------|-------------------------------|-------------------------------|
| <b>Honduras</b>  | 2.91 (1.87,<br>4.16)          | 35.95<br>(23.14,<br>51.41) | 56.82 (36.73,<br>80.36)   | 18.89<br>(11.77,<br>27.36)          | 233.27<br>(145.37,<br>337.87) | 373.02<br>(236.17,<br>536.20) | 21.84<br>(14.16,<br>30.66)          | 269.69<br>(174.88,<br>378.64) | 429.86<br>(279.86,<br>607.50) |
| <b>Hungary</b>   | 4.43 (2.93,<br>6.25)          | 43.61<br>(28.86,<br>61.47) | 27.78 (18.37,<br>39.22)   | 7.31 (5.32,<br>9.32)                | 71.89<br>(52.35,<br>91.69)    | 45.39 (33.18,<br>57.91)       | 11.77<br>(8.60,<br>15.16)           | 115.74<br>(84.56,<br>149.08)  | 73.26 (53.08,<br>94.52)       |
| <b>Iceland</b>   | 0.01 (0.01,<br>0.03)          | 4.32 (1.96,<br>7.91)       | 3.32 (1.51,<br>6.12)      | 0.02 (0.01,<br>0.04)                | 6.61 (3.15,<br>11.26)         | 4.67 (2.24,<br>7.93)          | 0.04 (0.02,<br>0.06)                | 10.97<br>(5.24,<br>18.70)     | 8.05 (3.82,<br>13.68)         |
| <b>India</b>     | 447.47<br>(289.00,<br>638.28) | 34.12<br>(22.03,<br>48.66) | 45.40 (29.19,<br>64.54)   | 2,048.91<br>(1,471.02,<br>2,662.61) | 156.21<br>(112.15,<br>203.00) | 192.55<br>(138.73,<br>249.04) | 2,502.15<br>(1,827.96,<br>3,204.77) | 190.77<br>(139.37,<br>244.33) | 238.25<br>(173.90,<br>303.98) |
| <b>Indonesia</b> | 40.67<br>(25.55,<br>60.13)    | 15.79<br>(9.92,<br>23.34)  | 20.02 (12.80,<br>29.32)   | 224.57<br>(158.94,<br>297.66)       | 87.17<br>(61.70,<br>115.54)   | 102.00 (72.07,<br>134.72)     | 265.23<br>(186.14,<br>351.41)       | 102.95<br>(72.25,<br>136.41)  | 122.19 (86.18,<br>162.36)     |
| <b>Iran</b>      | 40.01<br>(25.81,<br>56.48)    | 50.63<br>(32.66,<br>71.46) | 62.59 (40.71,<br>87.54)   | 63.94<br>(43.65,<br>87.16)          | 80.90<br>(55.23,<br>110.28)   | 113.67 (76.61,<br>156.53)     | 104.22<br>(74.20,<br>137.48)        | 131.87<br>(93.88,<br>173.95)  | 176.65<br>(125.09,<br>232.59) |
| <b>Iraq</b>      | 19.19<br>(12.49,<br>27.20)    | 52.68<br>(34.30,<br>74.68) | 101.57 (65.61,<br>143.07) | 55.87<br>(36.12,<br>78.88)          | 153.40<br>(99.19,<br>216.58)  | 318.22<br>(206.59,<br>449.32) | 75.32<br>(50.89,<br>102.71)         | 206.79<br>(139.73,<br>282.01) | 419.84<br>(287.98,<br>568.47) |
| <b>Ireland</b>   | 0.37 (0.21,<br>0.61)          | 7.79 (4.40,<br>12.69)      | 6.15 (3.49,<br>9.94)      | 0.75 (0.46,<br>1.15)                | 15.76<br>(9.63,<br>23.98)     | 12.00 (7.32,<br>18.19)        | 1.13 (0.70,<br>1.71)                | 23.65<br>(14.54,<br>35.63)    | 18.27 (11.28,<br>27.51)       |
| <b>Israel</b>    | 3.02 (2.00,<br>4.21)          | 37.57<br>(24.79,<br>52.28) | 34.58 (23.29,<br>48.51)   | 8.19 (5.64,<br>11.06)               | 101.74<br>(70.06,<br>137.39)  | 89.16 (61.66,<br>120.39)      | 11.22<br>(8.06,<br>14.81)           | 139.36<br>(100.15,<br>184.04) | 124.05 (88.27,<br>162.83)     |
| <b>Italy</b>     | 21.45<br>(13.88,<br>30.20)    | 34.16<br>(22.11,<br>48.10) | 18.21 (11.64,<br>25.94)   | 42.15<br>(30.49,<br>53.95)          | 67.12<br>(48.55,<br>85.91)    | 30.11 (21.70,<br>38.73)       | 63.56<br>(45.86,<br>82.14)          | 101.22<br>(73.03,<br>130.80)  | 48.45 (34.67,<br>63.06)       |
| <b>Jamaica</b>   | 0.85 (0.55,<br>1.24)          | 30.16<br>(19.31,<br>43.66) | 31.36 (20.01,<br>45.53)   | 4.10 (2.52,<br>5.95)                | 145.06<br>(88.93,<br>210.37)  | 150.41 (95.03,<br>220.47)     | 4.93 (3.20,<br>7.06)                | 174.26<br>(113.09,<br>249.40) | 182.02<br>(119.19,<br>259.29) |
| <b>Japan</b>     | 57.64<br>(36.80,<br>84.54)    | 44.92<br>(28.68,<br>65.89) | 21.97 (13.83,<br>32.50)   | 72.08<br>(49.89,<br>97.36)          | 56.18<br>(38.88,<br>75.88)    | 23.15 (16.00,<br>31.22)       | 129.79<br>(88.75,<br>178.70)        | 101.16<br>(69.17,<br>139.27)  | 45.26 (30.63,<br>62.55)       |
| <b>Jordan</b>    | 3.38 (2.20,<br>4.78)          | 44.69<br>(29.00,<br>63.16) | 73.69 (48.26,<br>104.12)  | 8.94 (5.84,<br>12.69)               | 118.07<br>(77.08,<br>167.59)  | 220.75<br>(145.55,<br>309.46) | 12.38<br>(8.47,<br>16.92)           | 163.52<br>(111.86,<br>223.54) | 295.39<br>(203.17,<br>401.39) |



|                   |                    |                      |                       |                     |                         |                         |                      |                         |                         |
|-------------------|--------------------|----------------------|-----------------------|---------------------|-------------------------|-------------------------|----------------------|-------------------------|-------------------------|
| <b>Kazakhstan</b> | 6.56 (4.09, 9.54)  | 37.39 (23.33, 54.40) | 44.28 (27.96, 64.54)  | 10.80 (7.42, 14.68) | 61.60 (42.29, 83.70)    | 67.01 (45.73, 91.21)    | 17.40 (12.14, 23.45) | 99.23 (69.24, 133.73)   | 111.27 (77.35, 149.82)  |
| <b>Kenya</b>      | 7.21 (4.44, 10.72) | 15.62 (9.60, 23.20)  | 32.62 (19.87, 48.33)  | 9.03 (6.02, 12.76)  | 19.55 (13.04, 27.62)    | 35.26 (23.26, 49.71)    | 16.31 (11.14, 22.40) | 35.32 (24.13, 48.50)    | 67.96 (46.37, 94.51)    |
| <b>Kiribati</b>   | 0.00 (0.00, 0.00)  | 0.00 (0.00, 2.78)    | 0.00 (0.00, 4.34)     | 0.00 (0.00, 0.02)   | 0.00 (0.00, 14.97)      | 0.00 (0.00, 22.50)      | 0.00 (0.00, 0.02)    | 0.00 (0.00, 17.59)      | 0.00 (0.00, 26.59)      |
| <b>Kuwait</b>     | 1.67 (1.07, 2.36)  | 42.72 (27.46, 60.56) | 62.14 (41.51, 87.34)  | 1.46 (0.94, 2.04)   | 37.47 (24.17, 52.38)    | 96.18 (63.34, 135.21)   | 3.13 (2.18, 4.19)    | 80.12 (56.00, 107.52)   | 158.85 (110.11, 212.88) |
| <b>Kyrgyzstan</b> | 1.60 (0.99, 2.32)  | 27.19 (16.87, 39.37) | 39.54 (25.16, 57.71)  | 3.97 (2.80, 5.24)   | 67.28 (47.48, 88.89)    | 77.55 (54.77, 102.49)   | 5.58 (3.92, 7.39)    | 94.65 (66.52, 125.35)   | 117.48 (82.40, 157.14)  |
| <b>Laos</b>       | 1.40 (0.92, 1.96)  | 20.54 (13.47, 28.90) | 35.90 (23.64, 50.12)  | 10.56 (7.48, 13.97) | 155.35 (109.96, 205.51) | 225.76 (160.53, 295.45) | 11.98 (8.56, 15.65)  | 176.24 (125.92, 230.19) | 261.99 (187.73, 338.96) |
| <b>Latvia</b>     | 1.15 (0.72, 1.66)  | 51.94 (32.47, 75.02) | 31.18 (19.79, 44.95)  | 1.23 (0.88, 1.59)   | 55.51 (39.91, 71.89)    | 35.81 (25.58, 46.79)    | 2.38 (1.68, 3.14)    | 107.46 (75.80, 141.87)  | 66.97 (47.80, 88.16)    |
| <b>Lebanon</b>    | 2.84 (1.86, 4.04)  | 49.32 (32.23, 70.05) | 52.61 (33.79, 73.67)  | 3.16 (2.20, 4.23)   | 54.82 (38.26, 73.35)    | 60.14 (42.42, 81.00)    | 6.03 (4.33, 7.85)    | 104.63 (75.20, 136.31)  | 113.49 (80.31, 149.05)  |
| <b>Lesotho</b>    | 0.89 (0.57, 1.28)  | 41.72 (26.56, 60.28) | 73.49 (46.75, 106.00) | 2.27 (1.40, 3.30)   | 106.69 (65.92, 154.98)  | 191.47 (120.26, 275.94) | 3.17 (2.11, 4.41)    | 148.80 (99.07, 207.33)  | 265.75 (177.38, 369.94) |
| <b>Liberia</b>    | 0.37 (0.16, 0.69)  | 8.13 (3.55, 15.26)   | 16.17 (7.14, 30.27)   | 1.02 (0.46, 1.85)   | 22.67 (10.20, 41.02)    | 37.89 (17.07, 68.49)    | 1.40 (0.63, 2.46)    | 31.11 (14.03, 54.65)    | 54.40 (24.99, 95.66)    |
| <b>Libya</b>      | 3.10 (1.99, 4.41)  | 49.22 (31.58, 70.12) | 64.63 (41.62, 91.46)  | 9.93 (6.69, 13.58)  | 157.79 (106.21, 215.77) | 239.23 (164.52, 324.97) | 12.98 (9.12, 17.43)  | 206.27 (144.95, 276.96) | 304.55 (214.36, 405.38) |
| <b>Lithuania</b>  | 1.40 (0.87, 2.03)  | 44.29 (27.62, 64.53) | 26.66 (16.65, 38.80)  | 1.23 (0.89, 1.59)   | 38.87 (28.18, 50.34)    | 25.74 (18.60, 33.17)    | 2.63 (1.83, 3.53)    | 83.36 (57.97, 112.11)   | 52.62 (36.84, 69.86)    |
| <b>Luxembourg</b> | 0.11 (0.07, 0.16)  | 20.08 (13.06, 28.98) | 14.63 (9.45, 21.29)   | 0.20 (0.14, 0.27)   | 35.99 (25.41, 48.02)    | 24.27 (17.12, 32.21)    | 0.31 (0.22, 0.42)    | 56.31 (39.71, 74.94)    | 38.94 (27.24, 52.34)    |

|                         |                       |                      |                       |                         |                         |                         |                         |                         |                         |
|-------------------------|-----------------------|----------------------|-----------------------|-------------------------|-------------------------|-------------------------|-------------------------|-------------------------|-------------------------|
| <b>Macedonia</b>        | 0.90 (0.59, 1.27)     | 43.25 (28.18, 61.19) | 34.63 (22.59, 48.79)  | 2.21 (1.61, 2.83)       | 106.56 (77.58, 136.06)  | 84.44 (61.71, 107.85)   | 3.12 (2.28, 3.98)       | 150.29 (109.65, 191.33) | 119.39 (86.76, 152.31)  |
| <b>Madagascar</b>       | 5.26 (3.22, 7.69)     | 21.73 (13.31, 31.80) | 45.18 (28.06, 66.20)  | 9.04 (5.99, 12.78)      | 37.37 (24.77, 52.83)    | 61.22 (40.58, 85.75)    | 14.36 (9.80, 19.61)     | 59.35 (40.52, 81.07)    | 107.07 (74.22, 146.41)  |
| <b>Malawi</b>           | 4.24 (2.62, 6.18)     | 24.65 (15.22, 35.88) | 56.22 (35.02, 82.60)  | 8.68 (5.88, 11.99)      | 50.42 (34.18, 69.66)    | 89.53 (60.33, 124.01)   | 12.99 (9.07, 17.38)     | 75.45 (52.71, 100.96)   | 146.34 (103.79, 194.95) |
| <b>Malaysia</b>         | 4.83 (2.98, 7.15)     | 15.95 (9.83, 23.60)  | 19.95 (12.31, 29.58)  | 17.65 (12.24, 23.82)    | 58.25 (40.41, 78.62)    | 75.22 (52.62, 100.56)   | 22.52 (15.61, 30.24)    | 74.33 (51.53, 99.81)    | 95.26 (66.73, 127.57)   |
| <b>Maldives</b>         | 0.08 (0.05, 0.12)     | 22.29 (14.33, 31.90) | 31.65 (20.35, 44.89)  | 0.49 (0.33, 0.67)       | 134.44 (90.97, 184.83)  | 206.14 (139.42, 282.81) | 0.57 (0.39, 0.77)       | 156.71 (107.58, 212.79) | 237.75 (164.88, 321.79) |
| <b>Mali</b>             | 6.34 (3.98, 9.08)     | 36.09 (22.66, 51.68) | 84.40 (54.25, 121.34) | 16.34 (10.69, 22.99)    | 93.03 (60.87, 130.87)   | 140.33 (92.29, 195.80)  | 22.81 (15.96, 30.76)    | 129.83 (90.82, 175.11)  | 225.22 (157.45, 301.52) |
| <b>Malta</b>            | 0.10 (0.06, 0.15)     | 24.57 (15.50, 35.79) | 15.83 (10.05, 23.22)  | 0.23 (0.16, 0.32)       | 56.10 (37.89, 77.44)    | 33.99 (23.02, 47.21)    | 0.34 (0.23, 0.46)       | 80.76 (55.48, 109.36)   | 49.99 (34.54, 68.39)    |
| <b>Marshall Islands</b> | 0.01 (0.01, 0.02)     | 16.60 (9.08, 27.35)  | 27.62 (15.35, 45.56)  | 0.08 (0.04, 0.14)       | 107.66 (53.64, 189.61)  | 171.05 (85.99, 298.82)  | 0.09 (0.05, 0.15)       | 124.80 (65.47, 213.03)  | 199.34 (104.19, 344.92) |
| <b>Mauritania</b>       | 1.84 (1.14, 2.66)     | 44.98 (27.94, 65.03) | 81.72 (51.93, 116.30) | 3.45 (2.23, 4.89)       | 84.49 (54.54, 119.68)   | 133.29 (87.40, 189.66)  | 5.32 (3.67, 7.21)       | 130.13 (89.96, 176.52)  | 216.06 (149.79, 291.21) |
| <b>Mauritius</b>        | 0.53 (0.33, 0.77)     | 41.27 (26.17, 60.30) | 37.45 (23.50, 54.65)  | 4.03 (2.77, 5.54)       | 316.19 (217.45, 434.77) | 278.43 (190.83, 382.07) | 4.57 (3.14, 6.26)       | 358.69 (246.54, 491.69) | 315.62 (217.48, 432.92) |
| <b>Mexico</b>           | 74.93 (49.49, 104.85) | 58.98 (38.95, 82.54) | 72.27 (48.02, 101.20) | 390.95 (286.18, 495.17) | 307.73 (225.26, 389.77) | 382.48 (279.40, 484.08) | 466.91 (339.46, 591.64) | 367.53 (267.20, 465.70) | 455.29 (332.51, 577.97) |
| <b>Moldova</b>          | 1.10 (0.69, 1.65)     | 27.07 (16.89, 40.47) | 23.99 (14.92, 35.33)  | 1.24 (0.87, 1.65)       | 30.56 (21.50, 40.70)    | 25.99 (18.17, 34.39)    | 2.35 (1.63, 3.18)       | 57.86 (40.20, 78.24)    | 49.92 (34.26, 68.11)    |
| <b>Mongolia</b>         | 1.44 (0.91, 2.07)     | 48.65 (30.89, 70.07) | 71.95 (45.44, 104.52) | 3.92 (1.84, 6.39)       | 132.82 (62.15, 216.42)  | 159.95 (82.07, 251.45)  | 5.36 (3.07, 8.10)       | 181.34 (104.12, 274.36) | 232.09 (144.46, 338.98) |

|                                 |                      |                      |                       |                       |                         |                         |                        |                         |                         |
|---------------------------------|----------------------|----------------------|-----------------------|-----------------------|-------------------------|-------------------------|------------------------|-------------------------|-------------------------|
| <b>Montenegro</b>               | 0.24 (0.15, 0.35)    | 37.99 (23.22, 55.93) | 29.04 (18.03, 41.99)  | 0.70 (0.50, 0.90)     | 111.08 (79.94, 144.42)  | 85.11 (61.70, 110.56)   | 0.94 (0.68, 1.21)      | 149.44 (108.02, 193.16) | 114.41 (83.11, 147.56)  |
| <b>Morocco</b>                  | 15.85 (10.18, 22.71) | 46.12 (29.62, 66.05) | 53.43 (34.34, 77.10)  | 59.22 (39.29, 82.64)  | 172.28 (114.30, 240.41) | 210.24 (136.95, 298.98) | 75.30 (52.04, 101.51)  | 219.08 (151.40, 295.32) | 264.23 (181.58, 360.76) |
| <b>Mozambique</b>               | 6.48 (4.07, 9.58)    | 23.17 (14.54, 34.21) | 49.55 (31.12, 72.18)  | 11.62 (6.16, 18.36)   | 41.52 (22.01, 65.59)    | 68.33 (36.08, 108.85)   | 18.11 (11.57, 26.09)   | 64.70 (41.34, 93.20)    | 117.80 (75.41, 170.55)  |
| <b>Myanmar</b>                  | 14.41 (9.15, 20.69)  | 26.68 (16.94, 38.30) | 34.36 (21.95, 48.94)  | 85.73 (60.05, 113.35) | 158.68 (111.14, 209.81) | 193.98 (139.31, 254.94) | 100.03 (71.37, 131.87) | 185.15 (132.09, 244.09) | 228.69 (163.33, 299.93) |
| <b>Namibia</b>                  | 0.75 (0.47, 1.07)    | 30.49 (19.14, 43.78) | 54.33 (34.63, 79.02)  | 1.43 (0.87, 2.14)     | 58.35 (35.30, 87.20)    | 107.16 (65.06, 160.65)  | 2.19 (1.43, 3.08)      | 89.26 (58.27, 125.54)   | 161.94 (106.15, 227.78) |
| <b>Nepal</b>                    | 10.76 (6.99, 15.23)  | 37.67 (24.48, 53.34) | 56.55 (35.89, 80.92)  | 36.26 (24.22, 50.10)  | 127.02 (84.83, 175.47)  | 181.39 (122.63, 251.34) | 47.16 (32.78, 63.76)   | 165.17 (114.82, 223.31) | 238.33 (166.71, 319.47) |
| <b>Netherlands</b>              | 3.09 (1.97, 4.49)    | 17.96 (11.48, 26.15) | 11.61 (7.37, 17.08)   | 5.32 (3.71, 7.17)     | 30.93 (21.57, 41.71)    | 17.93 (12.50, 24.14)    | 8.40 (5.85, 11.41)     | 48.89 (34.02, 66.40)    | 29.64 (20.46, 40.00)    |
| <b>New Zealand</b>              | 0.10 (0.00, 0.29)    | 2.30 (0.00, 6.35)    | 1.71 (0.00, 4.68)     | 0.27 (0.00, 0.71)     | 5.99 (0.00, 15.48)      | 4.23 (0.00, 11.06)      | 0.38 (0.00, 0.99)      | 8.28 (0.00, 21.61)      | 5.98 (0.00, 15.66)      |
| <b>Nicaragua</b>                | 2.46 (1.61, 3.45)    | 40.37 (26.47, 56.66) | 55.95 (36.53, 79.46)  | 19.41 (13.63, 25.94)  | 318.74 (223.87, 426.02) | 430.73 (300.43, 574.81) | 21.91 (15.44, 29.17)   | 359.93 (253.60, 479.10) | 486.52 (343.82, 646.79) |
| <b>Niger</b>                    | 7.23 (4.59, 10.31)   | 36.44 (23.13, 51.95) | 83.74 (53.34, 119.47) | 19.14 (11.85, 28.03)  | 96.42 (59.70, 141.17)   | 146.12 (93.15, 208.11)  | 26.36 (17.79, 36.22)   | 132.75 (89.59, 182.42)  | 231.08 (156.91, 313.98) |
| <b>Nigeria</b>                  | 61.22 (38.09, 88.68) | 33.55 (20.87, 48.59) | 71.93 (45.61, 103.27) | 57.66 (37.92, 80.13)  | 31.60 (20.78, 43.91)    | 44.94 (29.23, 62.98)    | 119.40 (82.97, 161.55) | 65.43 (45.47, 88.52)    | 117.66 (81.05, 158.12)  |
| <b>North Korea</b>              | 9.89 (6.46, 13.94)   | 39.31 (25.66, 55.40) | 40.32 (26.41, 57.00)  | 28.73 (20.52, 37.48)  | 114.19 (81.57, 148.96)  | 113.40 (81.07, 148.41)  | 38.69 (27.97, 50.53)   | 153.79 (111.16, 200.83) | 153.80 (111.17, 199.42) |
| <b>Northern Mariana Islands</b> | 0.02 (0.01, 0.02)    | 13.73 (8.23, 21.38)  | 25.74 (15.51, 39.61)  | 0.07 (0.04, 0.10)     | 56.73 (35.54, 85.53)    | 126.69 (80.14, 186.00)  | 0.08 (0.05, 0.12)      | 70.80 (45.02, 105.00)   | 152.32 (98.83, 222.85)  |

|                         |                      |                      |                       |                         |                         |                         |                         |                         |                         |
|-------------------------|----------------------|----------------------|-----------------------|-------------------------|-------------------------|-------------------------|-------------------------|-------------------------|-------------------------|
| <b>Norway</b>           | 0.35 (0.19, 0.57)    | 6.69 (3.67, 11.04)   | 4.62 (2.56, 7.55)     | 0.59 (0.34, 0.91)       | 11.41 (6.67, 17.61)     | 7.13 (4.16, 11.03)      | 0.94 (0.55, 1.46)       | 18.15 (10.61, 28.26)    | 11.76 (6.86, 18.27)     |
| <b>Oman</b>             | 2.04 (1.31, 2.90)    | 45.54 (29.20, 64.74) | 71.02 (46.68, 99.09)  | 2.27 (1.65, 2.91)       | 50.70 (36.73, 64.92)    | 113.44 (82.14, 146.06)  | 4.32 (3.09, 5.62)       | 96.49 (68.90, 125.40)   | 184.57 (133.94, 239.56) |
| <b>Pakistan</b>         | 47.74 (30.60, 68.12) | 25.25 (16.19, 36.03) | 39.99 (25.77, 56.99)  | 292.68 (174.43, 434.38) | 154.81 (92.27, 229.76)  | 215.59 (123.95, 322.52) | 342.45 (213.87, 492.17) | 181.14 (113.12, 260.33) | 254.25 (157.33, 365.23) |
| <b>Palestine</b>        | 1.84 (1.16, 2.65)    | 39.37 (24.73, 56.67) | 77.71 (50.22, 110.75) | 6.37 (4.64, 8.22)       | 136.36 (99.30, 175.88)  | 312.70 (225.51, 403.20) | 8.22 (5.97, 10.57)      | 175.83 (127.80, 226.11) | 391.28 (283.36, 502.90) |
| <b>Panama</b>           | 0.84 (0.52, 1.26)    | 21.27 (13.18, 32.00) | 24.12 (14.67, 36.23)  | 3.17 (2.10, 4.53)       | 80.74 (53.51, 115.26)   | 90.28 (59.97, 128.36)   | 4.02 (2.69, 5.61)       | 102.22 (68.42, 142.71)  | 114.94 (77.67, 159.65)  |
| <b>Papua New Guinea</b> | 1.02 (0.58, 1.64)    | 13.36 (7.66, 21.46)  | 23.89 (14.06, 37.88)  | 7.50 (3.99, 12.60)      | 98.32 (52.22, 165.03)   | 164.66 (87.62, 270.05)  | 8.59 (4.78, 13.94)      | 112.56 (62.64, 182.66)  | 188.56 (106.76, 304.33) |
| <b>Paraguay</b>         | 1.07 (0.67, 1.58)    | 16.15 (10.09, 23.78) | 22.06 (13.58, 33.09)  | 7.25 (4.98, 9.86)       | 108.93 (74.87, 148.24)  | 149.05 (102.59, 203.04) | 8.33 (5.69, 11.26)      | 125.17 (85.58, 169.27)  | 171.06 (118.47, 232.34) |
| <b>Peru</b>             | 6.45 (4.15, 9.18)    | 20.56 (13.22, 29.25) | 25.73 (16.56, 36.66)  | 34.03 (23.23, 46.67)    | 108.39 (74.00, 148.65)  | 133.73 (90.56, 180.87)  | 40.38 (28.21, 53.89)    | 128.62 (89.86, 171.68)  | 160.05 (112.59, 214.73) |
| <b>Philippines</b>      | 28.85 (18.52, 41.30) | 28.62 (18.37, 40.97) | 40.41 (25.99, 57.40)  | 259.30 (185.16, 337.40) | 257.24 (183.69, 334.71) | 354.39 (255.63, 460.41) | 287.75 (207.53, 372.02) | 285.46 (205.87, 369.05) | 394.64 (287.96, 511.26) |
| <b>Poland</b>           | 16.59 (10.98, 23.41) | 42.64 (28.22, 60.15) | 29.10 (18.79, 41.18)  | 24.23 (17.69, 31.13)    | 62.27 (45.45, 80.01)    | 41.86 (30.51, 53.59)    | 40.89 (29.87, 52.59)    | 105.08 (76.76, 135.15)  | 71.27 (51.55, 91.90)    |
| <b>Portugal</b>         | 1.71 (0.99, 2.72)    | 15.81 (9.20, 25.23)  | 8.93 (5.16, 14.25)    | 3.81 (2.34, 5.70)       | 35.29 (21.68, 52.81)    | 17.91 (11.04, 26.83)    | 5.54 (3.39, 8.34)       | 51.31 (31.41, 77.26)    | 26.99 (16.50, 40.67)    |
| <b>Puerto Rico</b>      | 1.51 (0.97, 2.15)    | 40.87 (26.40, 58.46) | 30.98 (20.18, 44.62)  | 5.52 (3.91, 7.28)       | 149.97 (106.23, 197.55) | 113.91 (81.06, 151.00)  | 7.03 (4.97, 9.27)       | 190.95 (135.04, 251.55) | 145.37 (102.98, 191.07) |
| <b>Qatar</b>            | 0.89 (0.57, 1.27)    | 39.90 (25.64, 57.14) | 60.35 (40.19, 84.52)  | 0.84 (0.51, 1.23)       | 37.93 (23.17, 55.38)    | 118.50 (73.98, 173.45)  | 1.73 (1.18, 2.38)       | 77.95 (52.91, 107.28)   | 180.00 (118.76, 250.16) |

|                                         |                      |                      |                       |                      |                         |                         |                        |                         |                         |
|-----------------------------------------|----------------------|----------------------|-----------------------|----------------------|-------------------------|-------------------------|------------------------|-------------------------|-------------------------|
| <b>Romania</b>                          | 6.85 (4.56, 9.70)    | 35.10 (23.33, 49.66) | 22.37 (14.74, 31.48)  | 14.11 (10.21, 18.23) | 72.25 (52.29, 93.34)    | 47.26 (33.91, 61.01)    | 21.02 (15.03, 27.30)   | 107.63 (77.00, 139.82)  | 69.60 (50.30, 90.70)    |
| <b>Russia</b>                           | 45.31 (27.94, 67.45) | 30.59 (18.86, 45.54) | 22.99 (14.08, 34.08)  | 54.05 (32.23, 81.33) | 36.49 (21.76, 54.91)    | 28.25 (16.88, 42.28)    | 100.14 (66.26, 140.14) | 67.61 (44.74, 94.61)    | 51.29 (34.08, 72.60)    |
| <b>Rwanda</b>                           | 3.02 (1.87, 4.36)    | 25.97 (16.05, 37.47) | 54.12 (33.17, 79.17)  | 4.28 (2.55, 6.38)    | 36.79 (21.93, 54.89)    | 66.56 (38.82, 99.41)    | 7.33 (4.95, 10.18)     | 63.00 (42.53, 87.49)    | 121.20 (82.06, 167.28)  |
| <b>Saint Lucia</b>                      | 0.04 (0.03, 0.07)    | 23.08 (13.90, 35.17) | 22.71 (13.76, 34.28)  | 0.20 (0.13, 0.27)    | 106.13 (72.88, 144.74)  | 103.81 (71.55, 141.19)  | 0.24 (0.17, 0.33)      | 129.38 (89.20, 176.24)  | 126.62 (87.55, 173.16)  |
| <b>Saint Vincent and the Grenadines</b> | 0.02 (0.02, 0.04)    | 22.50 (13.87, 33.75) | 24.70 (15.16, 37.46)  | 0.13 (0.09, 0.18)    | 121.90 (84.02, 166.76)  | 130.26 (90.01, 177.81)  | 0.16 (0.11, 0.22)      | 144.55 (99.57, 196.30)  | 155.22 (106.97, 212.14) |
| <b>Samoa</b>                            | 0.00 (0.00, 0.01)    | 0.00 (0.00, 3.84)    | 0.00 (0.00, 5.70)     | 0.00 (0.00, 0.04)    | 0.00 (0.00, 21.72)      | 0.00 (0.00, 32.36)      | 0.00 (0.00, 0.05)      | 0.00 (0.00, 25.64)      | 0.00 (0.00, 38.51)      |
| <b>Sao Tome and Principe</b>            | 0.05 (0.03, 0.07)    | 25.35 (15.10, 38.77) | 48.74 (29.60, 73.96)  | 0.17 (0.11, 0.26)    | 91.25 (57.95, 133.66)   | 153.48 (99.48, 221.91)  | 0.22 (0.14, 0.32)      | 116.63 (75.83, 168.74)  | 201.80 (134.38, 288.06) |
| <b>Saudi Arabia</b>                     | 13.27 (8.63, 18.98)  | 42.23 (27.44, 60.38) | 62.93 (41.40, 88.25)  | 34.01 (24.58, 43.86) | 108.19 (78.18, 139.51)  | 227.28 (166.46, 290.61) | 47.31 (34.52, 61.01)   | 150.50 (109.80, 194.09) | 291.08 (211.88, 372.82) |
| <b>Senegal</b>                          | 6.52 (4.13, 9.37)    | 43.18 (27.36, 62.00) | 89.98 (57.24, 129.26) | 17.32 (12.26, 22.75) | 114.64 (81.16, 150.60)  | 189.77 (136.70, 246.60) | 23.92 (17.22, 31.12)   | 158.33 (113.97, 205.94) | 280.40 (202.56, 362.00) |
| <b>Serbia</b>                           | 3.62 (2.36, 5.13)    | 40.87 (26.60, 57.97) | 26.73 (17.55, 38.13)  | 10.32 (7.49, 13.20)  | 116.57 (84.53, 149.08)  | 75.89 (55.14, 97.25)    | 13.91 (10.13, 17.91)   | 157.10 (114.42, 202.25) | 102.82 (74.80, 132.19)  |
| <b>Seychelles</b>                       | 0.02 (0.01, 0.02)    | 16.72 (9.88, 25.59)  | 17.41 (10.55, 26.44)  | 0.15 (0.10, 0.22)    | 157.96 (104.85, 223.41) | 165.03 (110.66, 233.29) | 0.17 (0.11, 0.24)      | 175.10 (117.35, 245.78) | 182.95 (123.36, 256.84) |
| <b>Sierra Leone</b>                     | 1.76 (1.09, 2.61)    | 27.31 (16.90, 40.32) | 57.89 (35.55, 86.10)  | 5.04 (3.25, 7.28)    | 77.97 (50.36, 112.65)   | 115.11 (76.06, 165.01)  | 6.81 (4.62, 9.62)      | 105.39 (71.44, 148.83)  | 173.17 (116.39, 240.75) |
| <b>Singapore</b>                        | 1.56 (1.03, 2.22)    | 39.79 (26.21, 56.48) | 31.23 (20.24, 43.99)  | 2.85 (1.93, 3.94)    | 72.51 (49.28, 100.30)   | 59.44 (40.45, 82.38)    | 4.42 (3.07, 5.94)      | 112.75 (78.29, 151.41)  | 91.04 (63.80, 122.34)   |

|                        |                      |                      |                       |                       |                         |                         |                        |                         |                         |
|------------------------|----------------------|----------------------|-----------------------|-----------------------|-------------------------|-------------------------|------------------------|-------------------------|-------------------------|
| <b>Slovakia</b>        | 2.05 (1.30, 2.92)    | 36.82 (23.46, 52.56) | 26.93 (17.23, 38.62)  | 3.67 (2.63, 4.82)     | 66.15 (47.33, 86.81)    | 48.08 (34.41, 63.01)    | 5.74 (4.13, 7.48)      | 103.39 (74.37, 134.71)  | 75.35 (53.37, 98.22)    |
| <b>Slovenia</b>        | 0.76 (0.49, 1.09)    | 36.97 (23.84, 52.95) | 22.44 (14.62, 31.75)  | 0.74 (0.53, 0.96)     | 35.71 (25.55, 46.58)    | 19.26 (13.81, 25.17)    | 1.50 (1.07, 1.98)      | 72.72 (51.62, 95.92)    | 41.95 (29.69, 55.35)    |
| <b>Solomon Islands</b> | 0.02 (0.00, 0.05)    | 2.71 (0.00, 8.38)    | 4.99 (0.00, 15.26)    | 0.14 (0.00, 0.41)     | 23.14 (0.00, 70.41)     | 40.62 (0.00, 123.55)    | 0.15 (0.00, 0.46)      | 25.72 (0.00, 77.88)     | 45.76 (0.00, 138.00)    |
| <b>Somalia</b>         | 2.96 (1.85, 4.35)    | 27.31 (17.04, 40.10) | 57.58 (36.03, 84.84)  | 5.51 (3.55, 7.90)     | 50.78 (32.77, 72.85)    | 89.84 (58.08, 129.98)   | 8.53 (5.80, 11.81)     | 78.63 (53.43, 108.87)   | 148.16 (100.71, 204.83) |
| <b>South Africa</b>    | 27.41 (17.89, 38.81) | 51.02 (33.31, 72.23) | 67.92 (44.54, 95.71)  | 81.03 (59.31, 102.93) | 150.82 (110.39, 191.60) | 190.53 (139.55, 242.61) | 108.75 (79.90, 138.51) | 202.42 (148.72, 257.83) | 259.46 (189.72, 330.98) |
| <b>South Korea</b>     | 24.09 (16.23, 33.14) | 47.91 (32.28, 65.91) | 35.22 (23.78, 48.74)  | 32.63 (21.06, 45.80)  | 64.89 (41.88, 91.08)    | 47.57 (31.30, 67.16)    | 56.83 (40.04, 75.77)   | 113.03 (79.62, 150.69)  | 83.04 (58.26, 110.17)   |
| <b>South Sudan</b>     | 4.16 (2.62, 5.98)    | 33.85 (21.28, 48.68) | 71.82 (44.86, 104.50) | 6.02 (3.84, 8.64)     | 48.97 (31.25, 70.29)    | 83.15 (52.95, 119.74)   | 10.22 (7.03, 13.78)    | 83.14 (57.24, 112.15)   | 155.42 (107.47, 212.16) |
| <b>Spain</b>           | 8.34 (4.81, 13.36)   | 17.11 (9.87, 27.41)  | 10.21 (5.88, 16.32)   | 11.66 (7.25, 17.41)   | 23.92 (14.87, 35.71)    | 11.96 (7.42, 17.73)     | 20.04 (12.24, 30.13)   | 41.11 (25.12, 61.80)    | 22.12 (13.53, 33.48)    |
| <b>Sri Lanka</b>       | 6.74 (4.41, 9.60)    | 32.50 (21.25, 46.29) | 32.31 (20.93, 45.89)  | 30.64 (20.66, 41.83)  | 147.68 (99.59, 201.61)  | 145.77 (100.00, 197.32) | 37.46 (26.07, 50.17)   | 180.56 (125.66, 241.80) | 178.26 (125.31, 238.47) |
| <b>Sudan</b>           | 17.14 (11.07, 24.14) | 42.44 (27.40, 59.77) | 75.61 (50.12, 105.62) | 54.41 (36.50, 74.99)  | 134.71 (90.36, 185.67)  | 234.94 (156.60, 330.04) | 71.81 (49.63, 95.93)   | 177.81 (122.88, 237.51) | 311.20 (213.50, 423.15) |
| <b>Suriname</b>        | 0.14 (0.09, 0.20)    | 25.84 (16.27, 37.78) | 29.49 (18.58, 43.47)  | 0.92 (0.64, 1.24)     | 169.52 (118.42, 228.60) | 193.35 (134.48, 259.66) | 1.06 (0.74, 1.42)      | 195.57 (136.51, 262.14) | 223.20 (155.73, 298.41) |
| <b>Swaziland</b>       | 0.44 (0.29, 0.64)    | 34.42 (22.15, 49.72) | 66.36 (42.53, 94.95)  | 1.07 (0.55, 1.69)     | 83.05 (42.89, 131.20)   | 159.16 (84.75, 252.88)  | 1.51 (0.93, 2.23)      | 117.26 (71.89, 173.20)  | 224.89 (141.20, 332.16) |
| <b>Sweden</b>          | 0.36 (0.05, 0.80)    | 3.69 (0.55, 8.14)    | 2.26 (0.34, 5.03)     | 0.59 (0.09, 1.22)     | 5.99 (0.87, 12.47)      | 3.22 (0.48, 6.74)       | 0.95 (0.14, 1.98)      | 9.73 (1.43, 20.17)      | 5.52 (0.82, 11.48)      |



|                            |                            |                             |                          |                               |                               |                               |                               |                               |                               |
|----------------------------|----------------------------|-----------------------------|--------------------------|-------------------------------|-------------------------------|-------------------------------|-------------------------------|-------------------------------|-------------------------------|
| <b>Switzerland</b>         | 1.71 (1.05,<br>2.59)       | 20.64<br>(12.68,<br>31.26)  | 13.02 (7.91,<br>19.65)   | 2.11 (1.34,<br>3.10)          | 25.54<br>(16.22,<br>37.49)    | 13.62 (8.63,<br>20.04)        | 3.84 (2.53,<br>5.47)          | 46.38<br>(30.56,<br>66.14)    | 26.68 (17.56,<br>38.31)       |
| <b>Syria</b>               | 7.11 (4.50,<br>10.34)      | 38.18<br>(24.18,<br>55.51)  | 60.33 (38.67,<br>86.39)  | 16.36<br>(10.44,<br>23.32)    | 87.86<br>(56.05,<br>125.22)   | 141.61 (81.93,<br>212.25)     | 23.61<br>(16.44,<br>31.59)    | 126.79<br>(88.26,<br>169.63)  | 201.75<br>(134.52,<br>283.36) |
| <b>Tajikistan</b>          | 2.82 (1.79,<br>4.05)       | 33.23<br>(21.02,<br>47.65)  | 58.23 (37.24,<br>83.38)  | 7.10 (4.96,<br>9.50)          | 83.52<br>(58.29,<br>111.75)   | 105.21 (73.36,<br>140.51)     | 9.96 (7.14,<br>13.14)         | 117.10<br>(84.04,<br>154.52)  | 163.73<br>(117.63,<br>214.65) |
| <b>Tanzania</b>            | 13.76<br>(8.49,<br>20.08)  | 25.79<br>(15.92,<br>37.61)  | 55.74 (35.21,<br>80.51)  | 27.22<br>(19.17,<br>36.19)    | 51.00<br>(35.92,<br>67.81)    | 87.12 (61.28,<br>116.64)      | 41.06<br>(29.18,<br>54.43)    | 76.94<br>(54.67,<br>101.99)   | 143.21<br>(100.95,<br>190.96) |
| <b>Thailand</b>            | 27.14<br>(17.67,<br>38.62) | 39.97<br>(26.03,<br>56.88)  | 33.88 (22.16,<br>47.79)  | 140.01<br>(101.18,<br>180.95) | 206.22<br>(149.02,<br>266.52) | 171.39<br>(123.59,<br>221.15) | 167.25<br>(121.13,<br>215.36) | 246.34<br>(178.41,<br>317.21) | 205.12<br>(148.73,<br>264.89) |
| <b>The Bahamas</b>         | 0.07 (0.05,<br>0.11)       | 19.36<br>(11.85,<br>29.42)  | 19.87 (12.22,<br>30.23)  | 0.41 (0.28,<br>0.57)          | 105.56<br>(71.18,<br>147.20)  | 105.35 (71.38,<br>147.16)     | 0.49 (0.33,<br>0.67)          | 125.28<br>(84.18,<br>173.53)  | 125.71 (84.37,<br>174.29)     |
| <b>The Gambia</b>          | 0.68 (0.42,<br>0.98)       | 33.86<br>(20.99,<br>48.78)  | 81.01 (51.16,<br>116.49) | 1.49 (1.01,<br>2.04)          | 74.24<br>(50.69,<br>102.08)   | 130.92 (90.23,<br>176.72)     | 2.17 (1.52,<br>2.89)          | 108.35<br>(76.15,<br>144.33)  | 212.34<br>(150.15,<br>281.19) |
| <b>Timor-Leste</b>         | 0.13 (0.08,<br>0.19)       | 10.59<br>(6.62,<br>15.79)   | 18.13 (11.17,<br>26.69)  | 0.55 (0.32,<br>0.85)          | 46.57<br>(27.21,<br>71.11)    | 71.35 (42.26,<br>109.34)      | 0.68 (0.42,<br>1.01)          | 57.16<br>(35.65,<br>84.79)    | 90.03 (56.96,<br>132.62)      |
| <b>Togo</b>                | 2.88 (1.81,<br>4.13)       | 39.41<br>(24.84,<br>56.55)  | 78.92 (50.62,<br>112.90) | 6.49 (3.96,<br>9.52)          | 88.94<br>(54.21,<br>130.42)   | 140.32 (86.84,<br>207.76)     | 9.36 (6.26,<br>13.02)         | 128.21<br>(85.77,<br>178.27)  | 220.62<br>(147.56,<br>303.58) |
| <b>Tonga</b>               | 0.00 (0.00,<br>0.00)       | 0.00 (0.00,<br>4.34)        | 0.00 (0.00,<br>6.18)     | 0.00 (0.00,<br>0.03)          | 0.00 (0.00,<br>27.12)         | 0.00 (0.00,<br>39.21)         | 0.00 (0.00,<br>0.03)          | 0.00 (0.00,<br>31.16)         | 0.00 (0.00,<br>45.13)         |
| <b>Trinidad and Tobago</b> | 0.36 (0.22,<br>0.54)       | 26.48<br>(16.42,<br>39.35)  | 24.67 (15.46,<br>36.58)  | 1.76 (1.20,<br>2.41)          | 129.36<br>(88.11,<br>177.01)  | 117.31 (79.95,<br>160.41)     | 2.12 (1.45,<br>2.91)          | 155.66<br>(106.50,<br>213.89) | 142.26 (97.78,<br>193.90)     |
| <b>Tunisia</b>             | 7.08 (4.62,<br>9.84)       | 62.89<br>(41.10,<br>87.50)  | 64.17 (42.47,<br>90.61)  | 16.92<br>(10.83,<br>24.13)    | 150.41<br>(96.24,<br>214.47)  | 166.49<br>(106.85,<br>237.69) | 24.11<br>(16.42,<br>33.07)    | 214.31<br>(145.96,<br>293.94) | 230.95<br>(156.75,<br>318.41) |
| <b>Turkey</b>              | 63.22<br>(41.62,<br>88.48) | 80.61<br>(53.08,<br>112.82) | 86.19 (56.33,<br>121.10) | 79.28<br>(54.93,<br>107.65)   | 101.09<br>(70.05,<br>137.27)  | 113.99 (78.91,<br>153.13)     | 143.05<br>(102.67,<br>187.25) | 182.41<br>(130.92,<br>238.78) | 200.99<br>(144.30,<br>264.54) |

|                             |                             |                            |                          |                              |                               |                               |                               |                               |                               |
|-----------------------------|-----------------------------|----------------------------|--------------------------|------------------------------|-------------------------------|-------------------------------|-------------------------------|-------------------------------|-------------------------------|
| <b>Turkmenistan</b>         | 2.53 (1.63,<br>3.64)        | 47.09<br>(30.30,<br>67.69) | 67.91 (42.54,<br>98.10)  | 8.66 (6.36,<br>10.90)        | 160.90<br>(118.25,<br>202.64) | 198.23<br>(145.67,<br>249.49) | 11.23<br>(8.23,<br>14.21)     | 208.67<br>(152.91,<br>264.14) | 266.68<br>(195.69,<br>338.43) |
| <b>Uganda</b>               | 9.17 (5.72,<br>13.20)       | 23.42<br>(14.61,<br>33.71) | 60.85 (38.80,<br>87.27)  | 19.21<br>(13.48,<br>25.56)   | 49.06<br>(34.42,<br>65.29)    | 95.39 (67.65,<br>125.88)      | 28.37<br>(20.17,<br>37.25)    | 72.46<br>(51.51,<br>95.13)    | 156.82<br>(111.58,<br>207.31) |
| <b>Ukraine</b>              | 13.52<br>(8.37,<br>19.79)   | 29.06<br>(18.00,<br>42.55) | 20.19 (12.64,<br>29.78)  | 13.19<br>(8.56,<br>18.92)    | 28.36<br>(18.41,<br>40.67)    | 21.20 (13.61,<br>30.58)       | 26.74<br>(18.11,<br>36.66)    | 57.49<br>(38.94,<br>78.83)    | 41.62 (28.40,<br>57.65)       |
| <b>United Arab Emirates</b> | 4.95 (3.20,<br>7.04)        | 54.16<br>(34.96,<br>76.97) | 74.23 (48.95,<br>105.11) | 11.09<br>(6.58,<br>16.60)    | 121.26<br>(71.91,<br>181.56)  | 226.66<br>(140.67,<br>329.49) | 16.03<br>(10.55,<br>22.82)    | 175.24<br>(115.35,<br>249.54) | 302.07<br>(200.89,<br>419.93) |
| <b>United Kingdom</b>       | 9.60 (5.90,<br>14.42)       | 14.94<br>(9.19,<br>22.45)  | 9.70 (6.06,<br>14.53)    | 11.85<br>(8.08,<br>16.24)    | 18.45<br>(12.57,<br>25.27)    | 11.01 (7.52,<br>15.09)        | 21.50<br>(14.36,<br>30.15)    | 33.47<br>(22.35,<br>46.93)    | 20.75 (13.83,<br>29.21)       |
| <b>United States</b>        | 61.54<br>(32.36,<br>105.07) | 19.02<br>(10.00,<br>32.48) | 14.51 (7.59,<br>24.72)   | 104.78<br>(58.14,<br>165.08) | 32.39<br>(17.97,<br>51.03)    | 23.30 (12.96,<br>36.77)       | 166.61<br>(91.84,<br>264.98)  | 51.50<br>(28.39,<br>81.90)    | 37.92 (20.91,<br>60.47)       |
| <b>Uruguay</b>              | 0.71 (0.43,<br>1.08)        | 20.69<br>(12.56,<br>31.57) | 15.67 (9.62,<br>24.00)   | 1.53 (1.01,<br>2.16)         | 44.42<br>(29.32,<br>62.88)    | 32.94 (21.77,<br>46.83)       | 2.24 (1.47,<br>3.18)          | 65.20<br>(42.90,<br>92.65)    | 48.80 (31.93,<br>69.47)       |
| <b>Uzbekistan</b>           | 11.53<br>(7.50,<br>16.42)   | 38.51<br>(25.05,<br>54.83) | 53.53 (34.39,<br>76.99)  | 39.04<br>(28.32,<br>50.30)   | 130.39<br>(94.60,<br>167.99)  | 148.03<br>(107.44,<br>190.30) | 50.65<br>(36.81,<br>64.96)    | 169.18<br>(122.95,<br>216.98) | 201.97<br>(146.53,<br>259.25) |
| <b>Vanuatu</b>              | 0.01 (0.00,<br>0.03)        | 5.58 (1.61,<br>11.49)      | 9.25 (2.66,<br>19.08)    | 0.12 (0.03,<br>0.25)         | 45.10<br>(12.84,<br>94.05)    | 71.48 (20.34,<br>148.26)      | 0.13 (0.04,<br>0.28)          | 51.16<br>(14.58,<br>106.04)   | 80.50 (23.32,<br>165.50)      |
| <b>Venezuela</b>            | 11.03<br>(7.21,<br>15.68)   | 35.44<br>(23.19,<br>50.42) | 44.25 (29.06,<br>63.09)  | 56.58<br>(40.06,<br>75.49)   | 181.91<br>(128.77,<br>242.68) | 224.40<br>(158.78,<br>299.11) | 67.82<br>(48.29,<br>88.71)    | 218.03<br>(155.25,<br>285.18) | 269.20<br>(192.79,<br>351.74) |
| <b>Vietnam</b>              | 20.60<br>(13.42,<br>29.12)  | 22.04<br>(14.36,<br>31.16) | 24.02 (15.53,<br>34.04)  | 123.68<br>(88.51,<br>161.51) | 132.32<br>(94.69,<br>172.79)  | 147.11<br>(105.04,<br>192.10) | 144.22<br>(103.44,<br>188.31) | 154.29<br>(110.66,<br>201.46) | 171.04<br>(123.43,<br>221.91) |
| <b>Virgin Islands, U.S.</b> | 0.03 (0.02,<br>0.05)        | 31.63<br>(19.64,<br>46.93) | 21.89 (13.33,<br>32.72)  | 0.17 (0.12,<br>0.23)         | 159.81<br>(109.28,<br>220.35) | 106.73 (72.23,<br>147.83)     | 0.21 (0.14,<br>0.28)          | 192.64<br>(132.92,<br>261.64) | 128.74 (88.45,<br>176.67)     |
| <b>Yemen</b>                | 10.76<br>(6.86,<br>15.33)   | 39.99<br>(25.51,<br>56.97) | 83.25 (54.04,<br>117.66) | 30.76<br>(18.58,<br>44.88)   | 114.32<br>(69.06,<br>166.75)  | 243.61<br>(148.90,<br>356.94) | 41.43<br>(27.53,<br>58.27)    | 153.93<br>(102.30,<br>216.52) | 327.43<br>(212.41,<br>459.04) |



|                                                                                                         |                      |                            |                          |                           |                             |                               |                            |                              |                               |
|---------------------------------------------------------------------------------------------------------|----------------------|----------------------------|--------------------------|---------------------------|-----------------------------|-------------------------------|----------------------------|------------------------------|-------------------------------|
| <b>Zambia</b>                                                                                           | 4.42 (2.80,<br>6.28) | 27.20<br>(17.24,<br>38.63) | 60.68 (38.79,<br>86.73)  | 10.69<br>(7.18,<br>14.66) | 65.77<br>(44.21,<br>90.22)  | 119.87 (80.00,<br>165.72)     | 15.13<br>(10.63,<br>20.18) | 93.12<br>(65.40,<br>124.18)  | 181.28<br>(127.74,<br>242.93) |
| <b>Zimbabwe</b>                                                                                         | 5.27 (3.33,<br>7.56) | 33.85<br>(21.41,<br>48.53) | 71.70 (45.37,<br>103.06) | 14.99<br>(9.74,<br>21.22) | 96.26<br>(62.54,<br>136.27) | 205.12<br>(133.09,<br>292.11) | 20.33<br>(13.95,<br>27.55) | 130.52<br>(89.56,<br>176.88) | 278.23<br>(188.52,<br>380.20) |
| <b>YLD, Years living with disability; YLL, Years of life lost; DALY, Disability adjusted life years</b> |                      |                            |                          |                           |                             |                               |                            |                              |                               |

**Supplemental table 3:** Frontier analysis for age standardized disability adjusted life years (DALY) rates and risk deleted DALY rates by Socio-demographic Index (SDI).

| Country                    | Region                  | Socio-demographic Index | DALY (Per 100,000) | Frontier (DALY Per 100,000) | Effective Difference (DALY Per 100,000) | Risk Deleted       |                             |                                         |
|----------------------------|-------------------------|-------------------------|--------------------|-----------------------------|-----------------------------------------|--------------------|-----------------------------|-----------------------------------------|
|                            |                         |                         |                    |                             |                                         | DALY (Per 100,000) | Frontier (DALY Per 100,000) | Effective Difference (DALY Per 100,000) |
| <b>Afghanistan</b>         | West & Central Asia     | 0.289                   | 616.34             | 116.07                      | 500.27                                  | 254.21             | 54.46                       | 199.75                                  |
| <b>Albania</b>             | Europe                  | 0.736                   | 80.29              | 8.72                        | 71.57                                   | 58.44              | 0.60                        | 57.83                                   |
| <b>Algeria</b>             | North Africa            | 0.590                   | 233.92             | 39.80                       | 194.13                                  | 93.55              | 6.71                        | 86.84                                   |
| <b>American Samoa</b>      | Oceania                 | 0.714                   | 0.00               | 2.83                        | 0.00                                    | 0.00               | 0.23                        | 0.00                                    |
| <b>Andorra</b>             | Europe                  | 0.919                   | 12.19              | 1.35                        | 10.84                                   | 6.40               | 0.12                        | 6.27                                    |
| <b>Angola</b>              | Sub-Saharan Africa      | 0.419                   | 151.41             | 84.75                       | 66.66                                   | 75.46              | 37.27                       | 38.19                                   |
| <b>Antigua and Barbuda</b> | North & Central America | 0.841                   | 119.87             | 3.49                        | 116.38                                  | 61.13              | 0.25                        | 60.88                                   |
| <b>Argentina</b>           | South America           | 0.772                   | 88.69              | 4.97                        | 83.71                                   | 41.39              | 0.29                        | 41.10                                   |
| <b>Armenia</b>             | West & Central Asia     | 0.755                   | 118.22             | 6.88                        | 111.34                                  | 59.73              | 0.57                        | 59.16                                   |
| <b>Australia</b>           | Oceania                 | 0.915                   | 6.46               | 1.18                        | 5.28                                    | 2.13               | 0.09                        | 2.04                                    |

|                               |                                  |       |        |        |        |        |       |        |
|-------------------------------|----------------------------------|-------|--------|--------|--------|--------|-------|--------|
| <b>Austria</b>                | Europe                           | 0.888 | 52.55  | 2.56   | 50.00  | 24.99  | 0.17  | 24.81  |
| <b>Azerbaijan</b>             | West & Central Asia              | 0.788 | 173.98 | 5.28   | 168.70 | 94.95  | 0.33  | 94.63  |
| <b>Bahrain</b>                | West & Central Asia              | 0.776 | 234.56 | 4.80   | 229.76 | 86.84  | 0.25  | 86.58  |
| <b>Bangladesh</b>             | South & Southeast Asia           | 0.472 | 183.21 | 62.05  | 121.16 | 80.55  | 18.48 | 62.07  |
| <b>Barbados</b>               | North & Central America          | 0.782 | 110.85 | 5.00   | 105.84 | 56.37  | 0.33  | 56.04  |
| <b>Belarus</b>                | East Asia                        | 0.847 | 49.26  | 3.59   | 45.67  | 33.58  | 0.25  | 33.33  |
| <b>Belgium</b>                | Europe                           | 0.882 | 35.87  | 3.56   | 32.31  | 18.20  | 0.18  | 18.01  |
| <b>Belize</b>                 | Mesoamerica (or Central America) | 0.665 | 356.94 | 14.40  | 342.54 | 184.41 | 1.25  | 183.16 |
| <b>Benin</b>                  | Sub-Saharan Africa               | 0.345 | 254.04 | 105.60 | 148.45 | 132.65 | 48.47 | 84.18  |
| <b>Bermuda</b>                | North & Central America          | 0.916 | 36.76  | 1.44   | 35.32  | 17.23  | 0.13  | 17.10  |
| <b>Bhutan</b>                 | South & Southeast Asia           | 0.532 | 220.68 | 46.18  | 174.49 | 87.52  | 10.15 | 77.37  |
| <b>Bolivia</b>                | South America                    | 0.612 | 316.08 | 41.66  | 274.43 | 164.20 | 6.46  | 157.74 |
| <b>Bosnia and Herzegovina</b> | Europe                           | 0.739 | 100.14 | 9.33   | 90.82  | 56.03  | 0.61  | 55.42  |
| <b>Botswana</b>               | Sub-Saharan Africa               | 0.641 | 151.38 | 16.86  | 134.52 | 71.40  | 1.69  | 69.71  |
| <b>Brazil</b>                 | South America                    | 0.662 | 64.76  | 14.60  | 50.17  | 32.98  | 1.42  | 31.56  |
| <b>Brunei</b>                 | South & Southeast Asia           | 0.923 | 10.86  | 0.95   | 9.91   | 2.89   | 0.06  | 2.83   |
| <b>Bulgaria</b>               | Europe                           | 0.808 | 105.94 | 4.59   | 101.35 | 60.69  | 0.33  | 60.36  |
| <b>Burkina Faso</b>           | Sub-Saharan Africa               | 0.237 | 190.49 | 175.07 | 15.41  | 95.27  | 86.52 | 8.75   |
| <b>Burundi</b>                | Sub-Saharan Africa               | 0.240 | 149.74 | 142.05 | 7.69   | 77.83  | 70.89 | 6.95   |
| <b>Cambodia</b>               | South & Southeast Asia           | 0.486 | 194.04 | 45.95  | 148.09 | 29.25  | 9.69  | 19.57  |
| <b>Cameroon</b>               | Sub-Saharan Africa               | 0.464 | 255.04 | 69.10  | 185.94 | 133.55 | 20.26 | 113.29 |

|                                         |                                  |       |        |        |        |        |       |       |
|-----------------------------------------|----------------------------------|-------|--------|--------|--------|--------|-------|-------|
| <b>Canada</b>                           | North America                    | 0.938 | 12.13  | 1.20   | 10.94  | 3.51   | 0.12  | 3.38  |
| <b>Cape Verde</b>                       | Sub-Saharan Africa               | 0.549 | 210.82 | 43.63  | 167.18 | 101.07 | 8.52  | 92.55 |
| <b>Central African Republic</b>         | Sub-Saharan Africa               | 0.282 | 191.79 | 134.31 | 57.48  | 97.07  | 63.65 | 33.42 |
| <b>Chad</b>                             | Sub-Saharan Africa               | 0.287 | 264.19 | 113.38 | 150.81 | 139.83 | 53.35 | 86.48 |
| <b>Chile</b>                            | South America                    | 0.805 | 129.54 | 5.44   | 124.10 | 58.36  | 0.35  | 58.01 |
| <b>China</b>                            | East Asia                        | 0.678 | 105.79 | 14.21  | 91.58  | 20.33  | 1.30  | 19.03 |
| <b>Colombia</b>                         | South America                    | 0.700 | 127.67 | 14.30  | 113.37 | 66.21  | 1.14  | 65.07 |
| <b>Comoros</b>                          | Sub-Saharan Africa               | 0.365 | 103.08 | 83.92  | 19.17  | 51.34  | 38.59 | 12.74 |
| <b>Congo</b>                            | Sub-Saharan Africa               | 0.527 | 165.95 | 47.33  | 118.62 | 81.54  | 10.61 | 70.93 |
| <b>Costa Rica</b>                       | Mesoamerica (or Central America) | 0.723 | 174.96 | 8.10   | 166.86 | 85.79  | 0.48  | 85.31 |
| <b>Cote d'Ivoire</b>                    | Sub-Saharan Africa               | 0.381 | 270.82 | 89.20  | 181.62 | 137.83 | 40.47 | 97.36 |
| <b>Croatia</b>                          | Europe                           | 0.784 | 69.03  | 4.71   | 64.31  | 34.25  | 0.27  | 33.97 |
| <b>Cuba</b>                             | North & Central America          | 0.766 | 87.58  | 4.73   | 82.85  | 43.90  | 0.36  | 43.54 |
| <b>Cyprus</b>                           | West & Central Asia              | 0.881 | 78.41  | 3.63   | 74.78  | 40.49  | 0.26  | 40.23 |
| <b>Czech Republic</b>                   | Europe                           | 0.892 | 58.62  | 2.54   | 56.08  | 32.15  | 0.18  | 31.98 |
| <b>Democratic Republic of the Congo</b> | Sub-Saharan Africa               | 0.239 | 143.94 | 142.01 | 1.93   | 71.79  | 69.93 | 1.86  |
| <b>Denmark</b>                          | Europe                           | 0.910 | 23.27  | 1.52   | 21.75  | 12.35  | 0.11  | 12.24 |
| <b>Djibouti</b>                         | Sub-Saharan Africa               | 0.462 | 159.20 | 68.65  | 90.55  | 78.25  | 20.59 | 57.66 |
| <b>Dominica</b>                         | North & Central America          | 0.753 | 170.57 | 7.01   | 163.56 | 84.96  | 0.56  | 84.40 |
| <b>Dominican Republic</b>               | North & Central America          | 0.684 | 143.44 | 14.86  | 128.58 | 75.39  | 1.34  | 74.05 |
| <b>Ecuador</b>                          | South America                    | 0.685 | 142.20 | 12.78  | 129.42 | 71.94  | 1.13  | 70.80 |

|                                           |                                        |       |        |        |        |        |       |        |
|-------------------------------------------|----------------------------------------|-------|--------|--------|--------|--------|-------|--------|
| <b>Egypt</b>                              | North Africa                           | 0.619 | 273.55 | 40.74  | 232.80 | 110.54 | 6.36  | 104.19 |
| <b>El Salvador</b>                        | Mesoamerica<br>(or Central<br>America) | 0.619 | 543.35 | 41.79  | 501.56 | 270.61 | 6.88  | 263.74 |
| <b>Equatorial Guinea</b>                  | Sub-Saharan<br>Africa                  | 0.609 | 127.91 | 41.46  | 86.45  | 61.33  | 6.54  | 54.79  |
| <b>Eritrea</b>                            | Sub-Saharan<br>Africa                  | 0.324 | 156.58 | 102.14 | 54.45  | 79.37  | 47.31 | 32.06  |
| <b>Estonia</b>                            | Europe                                 | 0.861 | 25.83  | 3.33   | 22.49  | 13.73  | 0.23  | 13.50  |
| <b>Ethiopia</b>                           | Sub-Saharan<br>Africa                  | 0.302 | 177.87 | 110.01 | 67.86  | 88.62  | 51.26 | 37.36  |
| <b>Federated States of<br/>Micronesia</b> | Oceania                                | 0.624 | 80.06  | 21.75  | 58.31  | 10.95  | 1.86  | 9.09   |
| <b>Fiji</b>                               | Oceania                                | 0.693 | 74.23  | 12.92  | 61.31  | 12.32  | 0.92  | 11.40  |
| <b>Finland</b>                            | Europe                                 | 0.893 | 6.67   | 1.45   | 5.22   | 3.32   | 0.13  | 3.19   |
| <b>France</b>                             | Europe                                 | 0.834 | 21.98  | 3.49   | 18.48  | 11.39  | 0.29  | 11.10  |
| <b>Gabon</b>                              | Sub-Saharan<br>Africa                  | 0.644 | 169.15 | 15.21  | 153.94 | 80.92  | 1.37  | 79.55  |
| <b>Georgia</b>                            | West & Central<br>Asia                 | 0.761 | 162.56 | 4.45   | 158.11 | 91.66  | 0.33  | 91.34  |
| <b>Germany</b>                            | Europe                                 | 0.903 | 39.52  | 1.59   | 37.94  | 19.02  | 0.15  | 18.87  |
| <b>Ghana</b>                              | Sub-Saharan<br>Africa                  | 0.511 | 221.70 | 46.74  | 174.96 | 111.84 | 11.38 | 100.46 |
| <b>Greece</b>                             | Europe                                 | 0.825 | 42.42  | 4.12   | 38.30  | 19.09  | 0.35  | 18.74  |
| <b>Greenland</b>                          | Europe                                 | 0.758 | 6.15   | 2.04   | 4.10   | 1.48   | 0.16  | 1.33   |
| <b>Grenada</b>                            | North & Central<br>America             | 0.753 | 212.35 | 7.33   | 205.03 | 110.85 | 0.58  | 110.27 |
| <b>Guam</b>                               | Oceania                                | 0.884 | 50.69  | 3.51   | 47.17  | 7.89   | 0.21  | 7.68   |
| <b>Guatemala</b>                          | Mesoamerica<br>(or Central<br>America) | 0.543 | 408.41 | 42.19  | 366.22 | 205.05 | 8.06  | 197.00 |
| <b>Guinea</b>                             | Sub-Saharan<br>Africa                  | 0.278 | 200.40 | 148.97 | 51.42  | 102.86 | 72.22 | 30.64  |
| <b>Guinea-Bissau</b>                      | Sub-Saharan<br>Africa                  | 0.294 | 349.02 | 115.70 | 233.32 | 178.80 | 54.47 | 124.32 |
| <b>Guyana</b>                             | South America                          | 0.655 | 193.49 | 15.00  | 178.49 | 101.06 | 1.33  | 99.73  |

|                   |                                  |       |        |       |        |        |       |        |
|-------------------|----------------------------------|-------|--------|-------|--------|--------|-------|--------|
| <b>Haiti</b>      | North & Central America          | 0.412 | 336.51 | 87.21 | 249.30 | 186.15 | 39.17 | 146.98 |
| <b>Honduras</b>   | Mesoamerica (or Central America) | 0.568 | 429.86 | 43.74 | 386.12 | 216.42 | 7.94  | 208.49 |
| <b>Hungary</b>    | Europe                           | 0.849 | 73.26  | 3.96  | 69.29  | 37.00  | 0.29  | 36.72  |
| <b>Iceland</b>    | Europe                           | 0.893 | 8.05   | 1.32  | 6.72   | 4.67   | 0.10  | 4.56   |
| <b>India</b>      | South & Southeast Asia           | 0.556 | 238.25 | 41.39 | 196.86 | 96.78  | 8.04  | 88.74  |
| <b>Indonesia</b>  | South & Southeast Asia           | 0.652 | 122.19 | 15.71 | 106.48 | 21.58  | 1.40  | 20.18  |
| <b>Iran</b>       | West & Central Asia              | 0.715 | 176.65 | 8.26  | 168.39 | 65.88  | 0.58  | 65.30  |
| <b>Iraq</b>       | West & Central Asia              | 0.576 | 419.84 | 43.41 | 376.43 | 162.62 | 7.59  | 155.02 |
| <b>Ireland</b>    | Europe                           | 0.885 | 18.27  | 2.28  | 15.99  | 9.74   | 0.18  | 9.56   |
| <b>Israel</b>     | West & Central Asia              | 0.842 | 124.05 | 3.98  | 120.07 | 31.83  | 0.33  | 31.50  |
| <b>Italy</b>      | Europe                           | 0.856 | 48.45  | 3.83  | 44.62  | 25.21  | 0.29  | 24.92  |
| <b>Jamaica</b>    | North & Central America          | 0.719 | 182.02 | 7.82  | 174.20 | 93.27  | 0.54  | 92.73  |
| <b>Japan</b>      | East Asia                        | 0.896 | 45.26  | 1.46  | 43.80  | 14.88  | 0.12  | 14.75  |
| <b>Jordan</b>     | West & Central Asia              | 0.695 | 295.39 | 13.45 | 281.94 | 100.48 | 1.30  | 99.18  |
| <b>Kazakhstan</b> | West & Central Asia              | 0.807 | 111.27 | 4.60  | 106.67 | 55.28  | 0.31  | 54.97  |
| <b>Kenya</b>      | Sub-Saharan Africa               | 0.472 | 67.96  | 53.14 | 14.82  | 34.27  | 17.23 | 17.04  |
| <b>Kiribati</b>   | Oceania                          | 0.478 | 0.00   | 5.25  | 0.00   | 0.00   | 0.85  | 0.00   |
| <b>Kuwait</b>     | West & Central Asia              | 0.862 | 158.85 | 3.98  | 154.87 | 58.61  | 0.27  | 58.34  |
| <b>Kyrgyzstan</b> | West & Central Asia              | 0.631 | 117.48 | 22.37 | 95.11  | 64.36  | 2.40  | 61.96  |
| <b>Laos</b>       | South & Southeast Asia           | 0.508 | 261.99 | 43.67 | 218.32 | 49.83  | 10.94 | 38.89  |
| <b>Latvia</b>     | Europe                           | 0.861 | 66.97  | 3.67  | 63.30  | 47.11  | 0.27  | 46.84  |

|                         |                                  |       |        |        |        |        |        |        |
|-------------------------|----------------------------------|-------|--------|--------|--------|--------|--------|--------|
| <b>Lebanon</b>          | West & Central Asia              | 0.755 | 113.49 | 6.75   | 106.74 | 45.38  | 0.53   | 44.85  |
| <b>Lesotho</b>          | Sub-Saharan Africa               | 0.522 | 265.75 | 47.44  | 218.31 | 126.81 | 10.02  | 116.79 |
| <b>Liberia</b>          | Sub-Saharan Africa               | 0.283 | 54.40  | 52.54  | 1.86   | 26.86  | 25.75  | 1.11   |
| <b>Libya</b>            | North Africa                     | 0.643 | 304.55 | 15.06  | 289.49 | 110.95 | 1.39   | 109.56 |
| <b>Lithuania</b>        | Europe                           | 0.837 | 52.62  | 3.79   | 48.83  | 35.49  | 0.34   | 35.15  |
| <b>Luxembourg</b>       | Europe                           | 0.911 | 38.94  | 1.64   | 37.30  | 20.17  | 0.12   | 20.05  |
| <b>Macedonia</b>        | Europe                           | 0.762 | 119.39 | 4.17   | 115.22 | 69.67  | 0.27   | 69.40  |
| <b>Madagascar</b>       | Sub-Saharan Africa               | 0.370 | 107.07 | 83.69  | 23.37  | 54.45  | 38.52  | 15.93  |
| <b>Malawi</b>           | Sub-Saharan Africa               | 0.309 | 146.34 | 105.99 | 40.35  | 73.88  | 48.96  | 24.92  |
| <b>Malaysia</b>         | South & Southeast Asia           | 0.767 | 95.26  | 5.08   | 90.18  | 10.32  | 0.32   | 10.00  |
| <b>Maldives</b>         | South & Southeast Asia           | 0.623 | 237.75 | 25.14  | 212.60 | 28.75  | 2.42   | 26.33  |
| <b>Mali</b>             | Sub-Saharan Africa               | 0.231 | 225.22 | 198.87 | 26.35  | 116.72 | 101.45 | 15.27  |
| <b>Malta</b>            | Europe                           | 0.806 | 49.99  | 4.82   | 45.17  | 25.70  | 0.33   | 25.38  |
| <b>Marshall Islands</b> | Oceania                          | 0.592 | 199.34 | 41.81  | 157.53 | 34.19  | 5.89   | 28.31  |
| <b>Mauritania</b>       | Sub-Saharan Africa               | 0.401 | 216.06 | 87.44  | 128.62 | 109.51 | 39.38  | 70.13  |
| <b>Mauritius</b>        | Sub-Saharan Africa               | 0.735 | 315.62 | 8.43   | 307.19 | 35.60  | 0.47   | 35.13  |
| <b>Mexico</b>           | Mesoamerica (or Central America) | 0.718 | 455.29 | 8.25   | 447.04 | 218.43 | 0.70   | 217.73 |
| <b>Moldova</b>          | East Asia                        | 0.703 | 49.92  | 12.12  | 37.80  | 33.98  | 1.10   | 32.88  |
| <b>Mongolia</b>         | East Asia                        | 0.705 | 232.09 | 12.51  | 219.59 | 122.00 | 1.12   | 120.89 |
| <b>Montenegro</b>       | Europe                           | 0.799 | 114.41 | 4.67   | 109.74 | 54.08  | 0.30   | 53.78  |
| <b>Morocco</b>          | North Africa                     | 0.496 | 264.23 | 45.46  | 218.77 | 120.60 | 11.21  | 109.39 |
| <b>Mozambique</b>       | Sub-Saharan Africa               | 0.278 | 117.80 | 113.00 | 4.80   | 59.03  | 53.99  | 5.05   |

|                                 |                                  |       |        |        |        |        |        |        |
|---------------------------------|----------------------------------|-------|--------|--------|--------|--------|--------|--------|
| <b>Myanmar</b>                  | South & Southeast Asia           | 0.520 | 228.69 | 47.08  | 181.62 | 33.54  | 9.52   | 24.02  |
| <b>Namibia</b>                  | Sub-Saharan Africa               | 0.617 | 161.94 | 41.24  | 120.69 | 75.52  | 6.97   | 68.55  |
| <b>Nepal</b>                    | South & Southeast Asia           | 0.423 | 238.33 | 87.48  | 150.85 | 89.43  | 38.56  | 50.86  |
| <b>Netherlands</b>              | Europe                           | 0.894 | 29.64  | 1.50   | 28.14  | 15.80  | 0.11   | 15.70  |
| <b>New Zealand</b>              | Oceania                          | 0.884 | 5.98   | 1.50   | 4.47   | 1.64   | 0.10   | 1.54   |
| <b>Nicaragua</b>                | Mesoamerica (or Central America) | 0.563 | 486.52 | 43.63  | 442.89 | 246.19 | 8.38   | 237.81 |
| <b>Niger</b>                    | Sub-Saharan Africa               | 0.147 | 231.08 | 235.99 | 0.00   | 120.56 | 124.29 | 0.00   |
| <b>Nigeria</b>                  | Sub-Saharan Africa               | 0.474 | 117.66 | 62.18  | 55.48  | 58.08  | 18.17  | 39.91  |
| <b>North Korea</b>              | East Asia                        | 0.565 | 153.80 | 42.37  | 111.43 | 31.95  | 7.70   | 24.24  |
| <b>Northern Mariana Islands</b> | Oceania                          | 0.841 | 152.32 | 3.75   | 148.57 | 22.46  | 0.35   | 22.12  |
| <b>Norway</b>                   | Europe                           | 0.937 | 11.76  | 1.14   | 10.62  | 6.83   | 0.09   | 6.74   |
| <b>Oman</b>                     | West & Central Asia              | 0.730 | 184.57 | 8.46   | 176.11 | 68.64  | 0.66   | 67.98  |
| <b>Pakistan</b>                 | West & Central Asia              | 0.468 | 254.25 | 70.13  | 184.12 | 108.52 | 19.77  | 88.75  |
| <b>Palestine</b>                | West & Central Asia              | 0.567 | 391.28 | 43.89  | 347.39 | 150.15 | 8.07   | 142.08 |
| <b>Panama</b>                   | Mesoamerica (or Central America) | 0.747 | 114.94 | 8.33   | 106.61 | 57.45  | 0.61   | 56.84  |
| <b>Papua New Guinea</b>         | Oceania                          | 0.448 | 188.56 | 85.54  | 103.02 | 35.56  | 26.98  | 8.58   |
| <b>Paraguay</b>                 | South America                    | 0.644 | 171.06 | 15.11  | 155.95 | 84.08  | 1.44   | 82.64  |
| <b>Peru</b>                     | South America                    | 0.705 | 160.05 | 12.58  | 147.47 | 86.35  | 1.11   | 85.24  |
| <b>Philippines</b>              | South & Southeast Asia           | 0.645 | 394.64 | 15.17  | 379.47 | 58.03  | 1.34   | 56.69  |
| <b>Poland</b>                   | Europe                           | 0.868 | 71.27  | 3.68   | 67.59  | 31.64  | 0.24   | 31.40  |
| <b>Portugal</b>                 | Europe                           | 0.752 | 26.99  | 5.72   | 21.27  | 10.69  | 0.44   | 10.24  |

|                                         |                         |       |        |        |        |        |       |        |
|-----------------------------------------|-------------------------|-------|--------|--------|--------|--------|-------|--------|
| <b>Puerto Rico</b>                      | North & Central America | 0.882 | 145.37 | 3.51   | 141.86 | 67.38  | 0.24  | 67.14  |
| <b>Qatar</b>                            | West & Central Asia     | 0.805 | 180.00 | 4.77   | 175.22 | 66.70  | 0.27  | 66.43  |
| <b>Romania</b>                          | Europe                  | 0.799 | 69.60  | 4.40   | 65.20  | 44.40  | 0.25  | 44.15  |
| <b>Russia</b>                           | East Asia               | 0.856 | 51.29  | 3.13   | 48.16  | 36.80  | 0.20  | 36.61  |
| <b>Rwanda</b>                           | Sub-Saharan Africa      | 0.371 | 121.20 | 86.13  | 35.07  | 61.80  | 39.03 | 22.77  |
| <b>Saint Lucia</b>                      | North & Central America | 0.741 | 126.62 | 8.57   | 118.05 | 65.96  | 0.64  | 65.32  |
| <b>Saint Vincent and the Grenadines</b> | North & Central America | 0.747 | 155.22 | 6.95   | 148.26 | 80.30  | 0.47  | 79.83  |
| <b>Samoa</b>                            | Oceania                 | 0.637 | 0.00   | 3.62   | 0.00   | 0.00   | 0.28  | 0.00   |
| <b>Sao Tome and Principe</b>            | Sub-Saharan Africa      | 0.448 | 201.80 | 88.19  | 113.61 | 101.72 | 38.89 | 62.82  |
| <b>Saudi Arabia</b>                     | West & Central Asia     | 0.759 | 291.08 | 4.78   | 286.30 | 98.26  | 0.28  | 97.98  |
| <b>Senegal</b>                          | Sub-Saharan Africa      | 0.334 | 280.40 | 102.79 | 177.61 | 140.37 | 47.36 | 93.02  |
| <b>Serbia</b>                           | Europe                  | 0.772 | 102.82 | 4.48   | 98.34  | 51.91  | 0.29  | 51.62  |
| <b>Seychelles</b>                       | Sub-Saharan Africa      | 0.759 | 182.95 | 4.62   | 178.33 | 22.80  | 0.35  | 22.45  |
| <b>Sierra Leone</b>                     | Sub-Saharan Africa      | 0.323 | 173.17 | 104.57 | 68.60  | 90.51  | 48.64 | 41.88  |
| <b>Singapore</b>                        | South & Southeast Asia  | 0.881 | 91.04  | 3.63   | 87.41  | 18.29  | 0.23  | 18.06  |
| <b>Slovakia</b>                         | Europe                  | 0.862 | 75.35  | 3.57   | 71.79  | 31.91  | 0.26  | 31.65  |
| <b>Slovenia</b>                         | Europe                  | 0.856 | 41.95  | 3.99   | 37.96  | 23.08  | 0.25  | 22.83  |
| <b>Solomon Islands</b>                  | Oceania                 | 0.461 | 45.76  | 46.46  | 0.00   | 5.56   | 7.81  | 0.00   |
| <b>Somalia</b>                          | Sub-Saharan Africa      | 0.151 | 148.16 | 152.80 | 0.00   | 74.94  | 77.75 | 0.00   |
| <b>South Africa</b>                     | Sub-Saharan Africa      | 0.716 | 259.46 | 9.56   | 249.90 | 129.46 | 0.74  | 128.72 |
| <b>South Korea</b>                      | East Asia               | 0.871 | 83.04  | 3.56   | 79.48  | 13.10  | 0.24  | 12.86  |
| <b>South Sudan</b>                      | Sub-Saharan Africa      | 0.262 | 155.42 | 143.99 | 11.43  | 76.43  | 69.55 | 6.88   |



|                            |                         |       |        |        |        |        |       |        |
|----------------------------|-------------------------|-------|--------|--------|--------|--------|-------|--------|
| <b>Spain</b>               | Europe                  | 0.819 | 22.12  | 3.70   | 18.42  | 11.46  | 0.31  | 11.15  |
| <b>Sri Lanka</b>           | South & Southeast Asia  | 0.705 | 178.26 | 11.82  | 166.44 | 22.96  | 0.80  | 22.16  |
| <b>Sudan</b>               | Sub-Saharan Africa      | 0.428 | 311.20 | 87.18  | 224.02 | 131.93 | 38.53 | 93.40  |
| <b>Suriname</b>            | South America           | 0.704 | 223.20 | 12.16  | 211.04 | 113.99 | 1.15  | 112.84 |
| <b>Swaziland</b>           | Sub-Saharan Africa      | 0.623 | 224.89 | 24.67  | 200.22 | 106.71 | 3.16  | 103.55 |
| <b>Sweden</b>              | Europe                  | 0.892 | 5.52   | 1.40   | 4.12   | 3.04   | 0.12  | 2.92   |
| <b>Switzerland</b>         | Europe                  | 0.928 | 26.68  | 1.37   | 25.31  | 11.53  | 0.11  | 11.42  |
| <b>Syria</b>               | West & Central Asia     | 0.579 | 201.75 | 41.84  | 159.91 | 80.22  | 7.90  | 72.32  |
| <b>Tajikistan</b>          | West & Central Asia     | 0.574 | 163.73 | 39.30  | 124.43 | 92.48  | 7.41  | 85.07  |
| <b>Tanzania</b>            | Sub-Saharan Africa      | 0.411 | 143.21 | 86.63  | 56.57  | 71.52  | 38.73 | 32.79  |
| <b>Thailand</b>            | South & Southeast Asia  | 0.705 | 205.12 | 12.80  | 192.32 | 19.55  | 1.02  | 18.53  |
| <b>The Bahamas</b>         | North & Central America | 0.835 | 125.71 | 3.78   | 121.93 | 65.03  | 0.28  | 64.75  |
| <b>The Gambia</b>          | Sub-Saharan Africa      | 0.327 | 212.34 | 106.09 | 106.26 | 103.27 | 48.78 | 54.49  |
| <b>Timor-Leste</b>         | South & Southeast Asia  | 0.450 | 90.03  | 73.14  | 16.89  | 14.59  | 13.40 | 1.19   |
| <b>Togo</b>                | Sub-Saharan Africa      | 0.362 | 220.62 | 105.78 | 114.84 | 113.01 | 48.13 | 64.88  |
| <b>Tonga</b>               | Oceania                 | 0.622 | 0.00   | 6.78   | 0.00   | 0.00   | 0.94  | 0.00   |
| <b>Trinidad and Tobago</b> | North & Central America | 0.833 | 142.26 | 3.78   | 138.48 | 73.04  | 0.27  | 72.77  |
| <b>Tunisia</b>             | North Africa            | 0.652 | 230.95 | 15.33  | 215.62 | 98.96  | 1.31  | 97.65  |
| <b>Turkey</b>              | West & Central Asia     | 0.690 | 200.99 | 15.07  | 185.91 | 65.65  | 1.36  | 64.29  |
| <b>Turkmenistan</b>        | West & Central Asia     | 0.781 | 266.68 | 4.72   | 261.96 | 147.02 | 0.33  | 146.69 |
| <b>Uganda</b>              | Sub-Saharan Africa      | 0.377 | 156.82 | 87.84  | 68.98  | 79.22  | 39.45 | 39.77  |
| <b>Ukraine</b>             | East Asia               | 0.811 | 41.62  | 4.21   | 37.42  | 29.60  | 0.28  | 29.32  |

|                                             |                         |       |        |       |        |        |       |        |
|---------------------------------------------|-------------------------|-------|--------|-------|--------|--------|-------|--------|
| <b>United Arab Emirates</b>                 | West & Central Asia     | 0.875 | 302.07 | 3.51  | 298.56 | 111.81 | 0.25  | 111.55 |
| <b>United Kingdom</b>                       | Europe                  | 0.893 | 20.75  | 1.64  | 19.12  | 11.97  | 0.12  | 11.85  |
| <b>United States</b>                        | North America           | 0.931 | 37.92  | 1.21  | 36.71  | 9.52   | 0.10  | 9.42   |
| <b>Uruguay</b>                              | South America           | 0.745 | 48.80  | 6.96  | 41.84  | 19.73  | 0.54  | 19.19  |
| <b>Uzbekistan</b>                           | West & Central Asia     | 0.699 | 201.97 | 14.47 | 187.50 | 112.81 | 1.15  | 111.65 |
| <b>Vanuatu</b>                              | Oceania                 | 0.536 | 80.50  | 38.48 | 42.02  | 13.48  | 5.46  | 8.03   |
| <b>Venezuela</b>                            | South America           | 0.728 | 269.20 | 8.85  | 260.34 | 130.43 | 0.55  | 129.87 |
| <b>Vietnam</b>                              | South & Southeast Asia  | 0.628 | 171.04 | 23.48 | 147.56 | 22.06  | 2.38  | 19.68  |
| <b>Virgin Islands, U.S.</b>                 | North & Central America | 0.886 | 128.74 | 2.48  | 126.26 | 62.83  | 0.16  | 62.67  |
| <b>Yemen</b>                                | West & Central Asia     | 0.408 | 327.43 | 88.39 | 239.04 | 129.35 | 40.08 | 89.27  |
| <b>Zambia</b>                               | Sub-Saharan Africa      | 0.467 | 181.28 | 69.00 | 112.28 | 93.25  | 20.79 | 72.46  |
| <b>Zimbabwe</b>                             | Sub-Saharan Africa      | 0.538 | 278.23 | 41.15 | 237.08 | 131.89 | 7.97  | 123.92 |
| <b>DALYs are age adjusted</b>               |                         |       |        |       |        |        |       |        |
| <b>DALY, Disability adjusted life years</b> |                         |       |        |       |        |        |       |        |

**Supplemental Table 4:** Attributable burden of disease (ABD) and disability adjusted life years (DALY) using the World Health Organization recommended level of PM<sub>2.5</sub> as the theoretical minimum risk exposure level (TMREL), 10 ug/m<sup>3</sup>

| Location                   | ABD<br>(in 1000s)                   | ABD<br>(per 100,000)      | Age<br>Standardized<br>ABD<br>(per 100,000) | DALY<br>(in 1000s)                   | DALY<br>(per 100,000)      | Age<br>Standardized<br>DALY<br>(per 100,000) |
|----------------------------|-------------------------------------|---------------------------|---------------------------------------------|--------------------------------------|----------------------------|----------------------------------------------|
| <b>Global</b>              | 5,005.39<br>(3,626.87,<br>6,397.35) | 67.91 (49.20,<br>86.79)   | 73.20 (53.22,<br>93.42)                     | 8,257.98<br>(6,012.93,<br>10,386.32) | 112.03 (81.57,<br>140.91)  | 118.28 (86.27,<br>148.54)                    |
| <b>Afghanistan</b>         | 21.98 (15.96,<br>28.25)             | 67.40 (48.93,<br>86.65)   | 138.11 (99.80,<br>180.11)                   | 69.58 (45.30,<br>97.15)              | 213.40 (138.94,<br>297.93) | 443.96 (293.57,<br>623.12)                   |
| <b>Albania</b>             | 0.97 (0.69, 1.27)                   | 33.42 (23.74,<br>43.70)   | 27.22 (19.45,<br>35.35)                     | 1.60 (1.13, 2.09)                    | 55.15 (38.92,<br>72.17)    | 47.21 (33.37,<br>61.57)                      |
| <b>Algeria</b>             | 33.44 (24.06,<br>42.68)             | 84.36 (60.70,<br>107.69)  | 106.95 (77.07,<br>137.86)                   | 51.11 (36.52,<br>66.58)              | 128.96 (92.13,<br>167.99)  | 169.14 (121.26,<br>219.48)                   |
| <b>American Samoa</b>      | 0.00 (0.00, 0.00)                   | 0.00 (0.00, 0.00)         | 0.00 (0.00, 0.00)                           | 0.00 (0.00, 0.00)                    | 0.00 (0.00, 0.00)          | 0.00 (0.00, 0.00)                            |
| <b>Andorra</b>             | 0.00 (0.00, 0.00)                   | 0.00 (0.00, 0.00)         | 0.00 (0.00, 0.00)                           | 0.00 (0.00, 0.00)                    | 0.00 (0.00, 0.00)          | 0.00 (0.00, 0.00)                            |
| <b>Angola</b>              | 13.40 (9.76,<br>17.23)              | 53.08 (38.63,<br>68.25)   | 120.74 (86.10,<br>155.91)                   | 12.85 (8.85,<br>17.55)               | 50.88 (35.05,<br>69.51)    | 109.31 (74.01,<br>149.93)                    |
| <b>Antigua and Barbuda</b> | 0.02 (0.01, 0.02)                   | 18.25 (12.86,<br>23.96)   | 19.86 (13.92,<br>26.35)                     | 0.04 (0.03, 0.05)                    | 40.12 (28.25,<br>52.78)    | 41.98 (29.34,<br>54.91)                      |
| <b>Argentina</b>           | 9.26 (6.50,<br>12.17)               | 21.34 (14.98,<br>28.04)   | 19.88 (13.97,<br>26.21)                     | 15.01 (10.73,<br>19.32)              | 34.57 (24.71,<br>44.51)    | 32.39 (23.02,<br>41.95)                      |
| <b>Armenia</b>             | 3.61 (2.56, 4.77)                   | 120.03 (85.19,<br>158.46) | 102.64 (72.84,<br>133.45)                   | 2.93 (2.11, 3.81)                    | 97.44 (70.00,<br>126.56)   | 83.33 (59.56,<br>108.46)                     |
| <b>Australia</b>           | 0.00 (0.00, 0.00)                   | 0.00 (0.00, 0.00)         | 0.00 (0.00, 0.00)                           | 0.00 (0.00, 0.00)                    | 0.00 (0.00, 0.00)          | 0.00 (0.00, 0.00)                            |
| <b>Austria</b>             | 4.85 (3.43, 6.31)                   | 55.93 (39.60,<br>72.76)   | 31.54 (22.45,<br>41.10)                     | 4.71 (3.40, 6.07)                    | 54.29 (39.23,<br>70.02)    | 30.12 (21.69,<br>38.70)                      |
| <b>Azerbaijan</b>          | 9.81 (6.97,<br>12.84)               | 100.33 (71.22,<br>131.27) | 116.91 (82.78,<br>152.33)                   | 11.22 (8.02,<br>14.72)               | 114.68 (82.00,<br>150.53)  | 125.34 (89.22,<br>163.91)                    |
| <b>Bahrain</b>             | 0.85 (0.61, 1.10)                   | 62.24 (44.93,<br>80.26)   | 96.84 (69.69,<br>124.03)                    | 1.26 (0.88, 1.69)                    | 92.33 (64.18,<br>123.36)   | 168.77 (117.82,<br>225.26)                   |
| <b>Bangladesh</b>          | 98.37 (71.45,<br>125.09)            | 61.12 (44.39,<br>77.72)   | 87.57 (62.83,<br>112.10)                    | 158.40 (114.47,<br>204.64)           | 98.41 (71.12,<br>127.14)   | 131.92 (94.99,<br>170.95)                    |

|                                 |                      |                        |                         |                      |                         |                         |
|---------------------------------|----------------------|------------------------|-------------------------|----------------------|-------------------------|-------------------------|
| <b>Barbados</b>                 | 0.10 (0.07, 0.13)    | 35.78 (25.28, 46.74)   | 26.04 (18.44, 33.95)    | 0.18 (0.13, 0.24)    | 64.56 (45.97, 83.78)    | 49.10 (34.89, 63.86)    |
| <b>Belarus</b>                  | 7.57 (5.29, 9.98)    | 78.75 (55.08, 103.81)  | 55.79 (39.35, 73.08)    | 3.95 (2.74, 5.27)    | 41.05 (28.52, 54.86)    | 30.35 (21.12, 40.37)    |
| <b>Belgium</b>                  | 4.37 (3.08, 5.73)    | 38.59 (27.21, 50.55)   | 22.33 (15.79, 29.14)    | 3.69 (2.63, 4.80)    | 32.59 (23.21, 42.36)    | 18.29 (13.00, 23.90)    |
| <b>Belize</b>                   | 0.18 (0.13, 0.23)    | 50.23 (36.31, 63.77)   | 86.32 (62.21, 111.02)   | 0.57 (0.41, 0.75)    | 160.19 (114.86, 207.71) | 256.89 (184.83, 332.08) |
| <b>Benin</b>                    | 9.38 (6.80, 12.07)   | 85.96 (62.33, 110.56)  | 159.79 (114.64, 207.00) | 11.67 (8.11, 15.70)  | 106.93 (74.32, 143.83)  | 183.62 (129.07, 243.93) |
| <b>Bermuda</b>                  | 0.00 (0.00, 0.00)    | 0.00 (0.00, 0.00)      | 0.00 (0.00, 0.00)       | 0.00 (0.00, 0.00)    | 0.00 (0.00, 0.00)       | 0.00 (0.00, 0.00)       |
| <b>Bhutan</b>                   | 0.46 (0.33, 0.58)    | 58.76 (42.60, 75.28)   | 84.66 (60.91, 109.00)   | 0.90 (0.61, 1.24)    | 116.56 (79.10, 159.41)  | 158.91 (108.55, 216.91) |
| <b>Bolivia</b>                  | 5.67 (4.12, 7.28)    | 52.70 (38.23, 67.63)   | 74.72 (54.09, 96.00)    | 18.26 (12.50, 24.63) | 169.63 (116.14, 228.76) | 227.62 (155.42, 310.03) |
| <b>Bosnia and Herzegovina</b>   | 2.50 (1.79, 3.21)    | 65.48 (47.09, 84.18)   | 44.13 (31.82, 56.59)    | 4.03 (2.91, 5.24)    | 105.76 (76.41, 137.56)  | 72.12 (51.59, 93.10)    |
| <b>Botswana</b>                 | 1.06 (0.75, 1.39)    | 46.83 (33.14, 61.51)   | 73.00 (51.63, 96.64)    | 1.06 (0.62, 1.59)    | 47.03 (27.49, 70.30)    | 78.14 (47.97, 116.14)   |
| <b>Brazil</b>                   | 11.82 (8.27, 15.56)  | 5.69 (3.98, 7.49)      | 6.28 (4.38, 8.28)       | 21.40 (15.16, 27.64) | 10.29 (7.29, 13.30)     | 11.12 (7.90, 14.42)     |
| <b>Brunei</b>                   | 0.00 (0.00, 0.00)    | 0.00 (0.00, 0.00)      | 0.00 (0.00, 0.00)       | 0.00 (0.00, 0.00)    | 0.00 (0.00, 0.00)       | 0.00 (0.00, 0.00)       |
| <b>Bulgaria</b>                 | 5.52 (3.95, 7.11)    | 75.88 (54.41, 97.79)   | 45.06 (32.67, 57.89)    | 8.81 (6.34, 11.43)   | 121.20 (87.24, 157.30)  | 76.38 (54.70, 99.19)    |
| <b>Burkina Faso</b>             | 13.01 (9.43, 16.64)  | 71.90 (52.12, 91.96)   | 149.63 (107.38, 193.44) | 12.94 (9.24, 16.87)  | 71.52 (51.08, 93.26)    | 137.35 (98.15, 179.85)  |
| <b>Burundi</b>                  | 6.96 (5.07, 8.91)    | 61.85 (45.11, 79.18)   | 128.03 (91.78, 164.95)  | 6.30 (4.42, 8.37)    | 55.98 (39.28, 74.45)    | 107.48 (75.07, 142.14)  |
| <b>Cambodia</b>                 | 4.16 (3.02, 5.31)    | 26.71 (19.37, 34.06)   | 41.02 (29.77, 52.49)    | 14.80 (10.67, 18.98) | 94.90 (68.44, 121.73)   | 139.82 (101.39, 178.67) |
| <b>Cameroon</b>                 | 17.44 (12.61, 22.31) | 74.53 (53.88, 95.36)   | 143.07 (103.50, 184.81) | 27.04 (17.85, 37.94) | 115.54 (76.27, 162.14)  | 183.33 (120.38, 256.90) |
| <b>Canada</b>                   | 0.00 (0.00, 0.00)    | 0.00 (0.00, 0.00)      | 0.00 (0.00, 0.00)       | 0.00 (0.00, 0.00)    | 0.00 (0.00, 0.00)       | 0.00 (0.00, 0.00)       |
| <b>Cape Verde</b>               | 0.54 (0.39, 0.69)    | 103.50 (74.92, 132.79) | 154.92 (110.80, 201.01) | 0.56 (0.40, 0.73)    | 108.20 (77.18, 141.11)  | 151.72 (108.17, 198.88) |
| <b>Central African Republic</b> | 3.44 (2.48, 4.42)    | 70.25 (50.63, 90.14)   | 123.73 (88.66, 158.84)  | 4.13 (2.89, 5.48)    | 84.31 (58.90, 111.85)   | 138.05 (96.19, 184.94)  |

|                                         |                         |                       |                         |                             |                        |                         |
|-----------------------------------------|-------------------------|-----------------------|-------------------------|-----------------------------|------------------------|-------------------------|
| <b>Chad</b>                             | 10.41 (7.56, 13.38)     | 74.04 (53.75, 95.15)  | 158.85 (113.74, 206.67) | 16.20 (11.42, 21.47)        | 115.20 (81.18, 152.68) | 190.06 (135.31, 248.39) |
| <b>Chile</b>                            | 12.89 (9.25, 16.73)     | 71.84 (51.53, 93.21)  | 62.97 (45.14, 81.15)    | 18.32 (12.76, 24.56)        | 102.06 (71.09, 136.84) | 89.44 (62.04, 120.05)   |
| <b>China</b>                            | 553.88 (401.61, 707.76) | 40.04 (29.03, 51.16)  | 35.31 (25.78, 45.01)    | 1,191.53 (869.38, 1,507.32) | 86.13 (62.84, 108.95)  | 76.16 (55.70, 96.10)    |
| <b>Colombia</b>                         | 29.70 (21.14, 38.65)    | 61.53 (43.81, 80.07)  | 70.74 (50.04, 92.03)    | 31.86 (22.71, 41.22)        | 66.02 (47.05, 85.40)   | 77.50 (55.34, 99.33)    |
| <b>Comoros</b>                          | 0.28 (0.20, 0.36)       | 34.97 (24.71, 45.66)  | 64.26 (45.62, 84.21)    | 0.25 (0.16, 0.35)           | 31.08 (20.39, 44.11)   | 56.48 (36.58, 80.01)    |
| <b>Congo</b>                            | 3.23 (2.34, 4.13)       | 69.68 (50.48, 89.33)  | 127.16 (91.21, 164.60)  | 3.06 (2.13, 4.08)           | 66.13 (45.96, 88.08)   | 119.50 (82.10, 160.66)  |
| <b>Costa Rica</b>                       | 4.60 (3.28, 5.97)       | 95.57 (68.20, 124.19) | 95.69 (68.57, 124.55)   | 5.61 (4.08, 7.14)           | 116.74 (84.78, 148.57) | 116.74 (84.28, 149.09)  |
| <b>Cote d'Ivoire</b>                    | 18.05 (12.96, 23.36)    | 79.57 (57.13, 102.95) | 143.36 (102.49, 187.33) | 24.96 (17.20, 33.69)        | 110.03 (75.81, 148.48) | 181.06 (124.07, 243.27) |
| <b>Croatia</b>                          | 2.88 (2.06, 3.72)       | 68.01 (48.54, 87.70)  | 40.27 (28.97, 51.94)    | 3.51 (2.52, 4.53)           | 82.84 (59.40, 106.76)  | 48.45 (34.93, 62.01)    |
| <b>Cuba</b>                             | 4.78 (3.39, 6.18)       | 41.93 (29.79, 54.28)  | 30.59 (21.70, 39.78)    | 7.55 (5.40, 9.69)           | 66.31 (47.44, 85.09)   | 49.26 (35.37, 63.36)    |
| <b>Cyprus</b>                           | 0.46 (0.32, 0.60)       | 51.51 (36.41, 67.08)  | 38.19 (26.83, 49.92)    | 0.59 (0.43, 0.76)           | 66.36 (47.88, 85.46)   | 48.27 (34.82, 61.71)    |
| <b>Czech Republic</b>                   | 6.38 (4.58, 8.22)       | 59.64 (42.84, 76.82)  | 37.56 (27.33, 48.18)    | 6.86 (4.91, 8.92)           | 64.13 (45.94, 83.43)   | 40.94 (29.44, 53.31)    |
| <b>Democratic Republic of the Congo</b> | 42.90 (31.03, 54.95)    | 55.42 (40.09, 70.98)  | 115.51 (82.91, 149.82)  | 40.74 (29.19, 53.05)        | 52.62 (37.71, 68.52)   | 103.70 (73.69, 135.06)  |
| <b>Denmark</b>                          | 0.30 (0.21, 0.40)       | 5.30 (3.68, 7.08)     | 3.13 (2.19, 4.16)       | 0.25 (0.17, 0.33)           | 4.38 (3.06, 5.77)      | 2.70 (1.89, 3.59)       |
| <b>Djibouti</b>                         | 0.65 (0.47, 0.84)       | 73.08 (52.68, 94.07)  | 121.71 (87.79, 157.11)  | 0.63 (0.43, 0.86)           | 70.67 (48.37, 96.80)   | 114.87 (78.22, 155.63)  |
| <b>Dominica</b>                         | 0.01 (0.01, 0.02)       | 19.08 (13.42, 25.10)  | 19.59 (13.87, 25.78)    | 0.04 (0.03, 0.05)           | 54.29 (38.24, 71.34)   | 55.30 (38.67, 72.77)    |
| <b>Dominican Republic</b>               | 3.94 (2.84, 5.07)       | 37.41 (26.97, 48.16)  | 47.21 (33.77, 60.99)    | 7.83 (5.53, 10.24)          | 74.37 (52.48, 97.27)   | 90.19 (63.68, 118.24)   |
| <b>Ecuador</b>                          | 2.21 (1.55, 2.89)       | 13.66 (9.60, 17.90)   | 17.66 (12.41, 23.19)    | 5.95 (4.24, 7.71)           | 36.80 (26.26, 47.70)   | 46.03 (32.60, 59.49)    |
| <b>Egypt</b>                            | 83.34 (60.45, 106.96)   | 91.43 (66.32, 117.35) | 124.26 (89.93, 159.34)  | 124.12 (84.50, 168.87)      | 136.18 (92.71, 185.27) | 197.49 (132.77, 271.08) |

|                                       |                      |                         |                         |                      |                         |                         |
|---------------------------------------|----------------------|-------------------------|-------------------------|----------------------|-------------------------|-------------------------|
| <b>El Salvador</b>                    | 9.16 (6.68, 11.57)   | 149.33 (108.87, 188.55) | 175.31 (128.04, 221.56) | 21.25 (15.13, 27.55) | 346.20 (246.49, 448.96) | 391.27 (280.15, 508.00) |
| <b>Equatorial Guinea</b>              | 0.63 (0.45, 0.82)    | 74.89 (53.52, 97.57)    | 121.56 (87.18, 157.49)  | 0.46 (0.29, 0.66)    | 53.85 (33.80, 77.55)    | 91.96 (58.70, 132.26)   |
| <b>Eritrea</b>                        | 3.20 (2.32, 4.10)    | 60.96 (44.19, 78.16)    | 125.53 (90.04, 162.49)  | 2.97 (2.04, 4.02)    | 56.73 (38.83, 76.59)    | 112.89 (78.78, 150.20)  |
| <b>Estonia</b>                        | 0.00 (0.00, 0.00)    | 0.00 (0.00, 0.00)       | 0.00 (0.00, 0.00)       | 0.00 (0.00, 0.00)    | 0.00 (0.00, 0.00)       | 0.00 (0.00, 0.00)       |
| <b>Ethiopia</b>                       | 65.83 (47.76, 84.63) | 66.20 (48.03, 85.11)    | 126.18 (90.75, 163.63)  | 67.95 (48.21, 89.90) | 68.34 (48.49, 90.41)    | 128.06 (90.83, 168.68)  |
| <b>Federated States of Micronesia</b> | 0.00 (0.00, 0.00)    | 0.00 (0.00, 0.00)       | 0.00 (0.00, 0.00)       | 0.00 (0.00, 0.00)    | 0.00 (0.00, 0.00)       | 0.00 (0.00, 0.00)       |
| <b>Fiji</b>                           | 0.00 (0.00, 0.00)    | 0.00 (0.00, 0.00)       | 0.00 (0.00, 0.00)       | 0.00 (0.00, 0.00)    | 0.00 (0.00, 0.00)       | 0.00 (0.00, 0.00)       |
| <b>Finland</b>                        | 0.00 (0.00, 0.00)    | 0.00 (0.00, 0.00)       | 0.00 (0.00, 0.00)       | 0.00 (0.00, 0.00)    | 0.00 (0.00, 0.00)       | 0.00 (0.00, 0.00)       |
| <b>France</b>                         | 9.44 (6.60, 12.52)   | 14.47 (10.12, 19.19)    | 8.07 (5.64, 10.60)      | 7.35 (5.18, 9.65)    | 11.27 (7.94, 14.80)     | 6.26 (4.37, 8.27)       |
| <b>Gabon</b>                          | 1.31 (0.95, 1.69)    | 75.97 (54.98, 97.76)    | 121.15 (87.25, 156.37)  | 1.34 (0.91, 1.84)    | 77.89 (52.50, 106.50)   | 121.85 (82.86, 165.77)  |
| <b>Georgia</b>                        | 4.47 (3.19, 5.81)    | 111.52 (79.78, 145.01)  | 88.20 (62.89, 114.83)   | 5.36 (3.85, 6.89)    | 133.91 (96.19, 172.09)  | 108.65 (78.21, 140.28)  |
| <b>Germany</b>                        | 29.62 (20.61, 39.24) | 35.42 (24.65, 46.92)    | 17.56 (12.38, 23.06)    | 28.42 (20.14, 37.19) | 33.99 (24.08, 44.48)    | 16.49 (11.71, 21.42)    |
| <b>Ghana</b>                          | 25.51 (18.34, 32.82) | 93.05 (66.91, 119.69)   | 156.61 (112.61, 203.64) | 27.39 (19.59, 36.02) | 99.90 (71.46, 131.36)   | 157.89 (112.67, 207.44) |
| <b>Greece</b>                         | 3.11 (2.18, 4.13)    | 28.48 (19.96, 37.84)    | 14.59 (10.28, 19.15)    | 3.51 (2.50, 4.57)    | 32.17 (22.86, 41.82)    | 16.17 (11.63, 21.05)    |
| <b>Greenland</b>                      | 0.00 (0.00, 0.00)    | 0.00 (0.00, 0.00)       | 0.00 (0.00, 0.00)       | 0.00 (0.00, 0.00)    | 0.00 (0.00, 0.00)       | 0.00 (0.00, 0.00)       |
| <b>Grenada</b>                        | 0.03 (0.02, 0.04)    | 25.49 (17.93, 33.25)    | 30.60 (21.67, 40.21)    | 0.09 (0.06, 0.11)    | 80.37 (56.68, 105.81)   | 92.92 (65.67, 121.98)   |
| <b>Guam</b>                           | 0.00 (0.00, 0.00)    | 0.00 (0.00, 0.00)       | 0.00 (0.00, 0.00)       | 0.00 (0.00, 0.00)    | 0.00 (0.00, 0.00)       | 0.00 (0.00, 0.00)       |
| <b>Guatemala</b>                      | 14.19 (10.27, 18.18) | 86.74 (62.81, 111.17)   | 151.50 (109.29, 195.59) | 30.82 (21.13, 41.65) | 188.47 (129.22, 254.64) | 293.76 (201.78, 397.48) |
| <b>Guinea</b>                         | 9.01 (6.42, 11.67)   | 71.68 (51.10, 92.78)    | 128.63 (90.70, 167.52)  | 10.01 (6.95, 13.46)  | 79.64 (55.23, 107.06)   | 131.47 (90.77, 176.10)  |
| <b>Guinea-Bissau</b>                  | 1.96 (1.41, 2.53)    | 106.12 (76.38, 136.74)  | 182.42 (132.07, 236.39) | 2.90 (2.04, 3.85)    | 156.81 (110.21, 208.47) | 251.12 (177.70, 334.40) |
| <b>Guyana</b>                         | 0.20 (0.14, 0.27)    | 26.36 (18.68, 34.60)    | 33.86 (24.13, 44.31)    | 0.60 (0.42, 0.78)    | 77.31 (55.14, 101.13)   | 94.06 (66.81, 122.08)   |

|                   |                           |                       |                         |                               |                         |                         |
|-------------------|---------------------------|-----------------------|-------------------------|-------------------------------|-------------------------|-------------------------|
| <b>Haiti</b>      | 5.35 (3.85, 6.80)         | 49.87 (35.93, 63.45)  | 81.26 (58.71, 104.11)   | 18.01 (11.79, 25.27)          | 167.94 (109.94, 235.67) | 242.70 (158.09, 335.78) |
| <b>Honduras</b>   | 7.05 (5.07, 9.13)         | 87.06 (62.61, 112.78) | 144.71 (103.71, 188.55) | 15.72 (10.16, 22.23)          | 194.17 (125.47, 274.60) | 309.35 (199.62, 431.69) |
| <b>Hungary</b>    | 7.19 (5.18, 9.27)         | 70.71 (50.99, 91.17)  | 43.77 (31.75, 56.07)    | 8.48 (6.16, 10.87)            | 83.42 (60.59, 106.92)   | 52.83 (38.17, 67.50)    |
| <b>Iceland</b>    | 0.00 (0.00, 0.00)         | 0.00 (0.00, 0.00)     | 0.00 (0.00, 0.00)       | 0.00 (0.00, 0.00)             | 0.00 (0.00, 0.00)       | 0.00 (0.00, 0.00)       |
| <b>India</b>      | 786.55 (568.75, 1,006.63) | 59.97 (43.36, 76.75)  | 77.91 (56.46, 99.99)    | 1,801.84 (1,309.50, 2,298.82) | 137.37 (99.84, 175.26)  | 171.90 (125.02, 217.84) |
| <b>Indonesia</b>  | 38.10 (26.91, 49.38)      | 14.79 (10.45, 19.17)  | 18.54 (13.14, 23.97)    | 131.65 (94.36, 168.66)        | 51.10 (36.63, 65.47)    | 60.56 (43.44, 77.50)    |
| <b>Iran</b>       | 65.60 (47.37, 84.25)      | 83.01 (59.94, 106.60) | 107.31 (77.53, 138.37)  | 75.07 (53.25, 98.71)          | 94.98 (67.37, 124.89)   | 127.28 (90.41, 167.32)  |
| <b>Iraq</b>       | 25.02 (18.15, 32.10)      | 68.69 (49.84, 88.14)  | 135.49 (97.84, 174.11)  | 54.04 (36.71, 74.16)          | 148.38 (100.80, 203.61) | 302.27 (208.95, 407.86) |
| <b>Ireland</b>    | 0.00 (0.00, 0.00)         | 0.00 (0.00, 0.00)     | 0.00 (0.00, 0.00)       | 0.00 (0.00, 0.00)             | 0.00 (0.00, 0.00)       | 0.00 (0.00, 0.00)       |
| <b>Israel</b>     | 5.39 (3.86, 6.92)         | 66.96 (48.01, 85.94)  | 60.56 (43.99, 78.24)    | 7.77 (5.56, 10.12)            | 96.58 (69.04, 125.79)   | 85.70 (60.78, 112.41)   |
| <b>Italy</b>      | 48.18 (34.38, 62.54)      | 76.73 (54.75, 99.59)  | 37.35 (26.87, 48.50)    | 42.12 (30.31, 54.13)          | 67.07 (48.27, 86.20)    | 32.10 (23.13, 41.26)    |
| <b>Jamaica</b>    | 1.15 (0.82, 1.49)         | 40.59 (28.99, 52.60)  | 42.96 (30.55, 56.17)    | 2.81 (1.84, 3.93)             | 99.18 (65.01, 138.75)   | 103.55 (68.49, 144.47)  |
| <b>Japan</b>      | 50.38 (35.22, 66.88)      | 39.26 (27.45, 52.12)  | 16.75 (11.79, 21.90)    | 48.57 (34.25, 63.35)          | 37.85 (26.69, 49.37)    | 16.88 (11.94, 22.17)    |
| <b>Jordan</b>     | 5.00 (3.65, 6.43)         | 66.07 (48.16, 84.91)  | 113.96 (81.78, 147.50)  | 8.90 (6.09, 12.15)            | 117.52 (80.39, 160.47)  | 212.61 (146.56, 288.57) |
| <b>Kazakhstan</b> | 11.04 (7.85, 14.44)       | 62.98 (44.78, 82.36)  | 73.34 (52.15, 96.31)    | 10.16 (7.12, 13.50)           | 57.96 (40.60, 76.99)    | 65.03 (45.58, 86.68)    |
| <b>Kenya</b>      | 12.04 (8.51, 15.61)       | 26.06 (18.42, 33.80)  | 52.29 (36.88, 68.52)    | 8.57 (5.98, 11.45)            | 18.56 (12.95, 24.78)    | 35.82 (24.74, 48.42)    |
| <b>Kiribati</b>   | 0.00 (0.00, 0.00)         | 0.00 (0.00, 0.00)     | 0.00 (0.00, 0.00)       | 0.00 (0.00, 0.00)             | 0.00 (0.00, 0.00)       | 0.00 (0.00, 0.00)       |
| <b>Kuwait</b>     | 2.16 (1.54, 2.77)         | 55.27 (39.61, 71.00)  | 92.57 (67.03, 119.14)   | 2.26 (1.56, 3.02)             | 57.88 (40.11, 77.39)    | 114.27 (79.77, 152.45)  |
| <b>Kyrgyzstan</b> | 2.30 (1.63, 3.02)         | 38.97 (27.61, 51.20)  | 56.95 (39.97, 74.65)    | 3.05 (2.17, 3.95)             | 51.78 (36.88, 67.08)    | 64.33 (46.01, 83.27)    |
| <b>Laos</b>       | 1.87 (1.36, 2.38)         | 27.48 (19.97, 34.94)  | 46.84 (33.91, 59.47)    | 8.64 (6.14, 11.33)            | 127.05 (90.36, 166.61)  | 188.65 (136.73, 243.39) |

|                         |                        |                        |                         |                         |                         |                         |
|-------------------------|------------------------|------------------------|-------------------------|-------------------------|-------------------------|-------------------------|
| <b>Latvia</b>           | 2.82 (2.00, 3.69)      | 127.37 (90.52, 166.94) | 76.37 (54.21, 99.86)    | 1.59 (1.13, 2.10)       | 72.01 (51.09, 95.01)    | 44.92 (31.99, 58.53)    |
| <b>Lebanon</b>          | 4.35 (3.14, 5.57)      | 75.56 (54.56, 96.66)   | 80.84 (58.27, 104.12)   | 4.34 (3.10, 5.66)       | 75.29 (53.74, 98.22)    | 81.72 (58.13, 106.46)   |
| <b>Lesotho</b>          | 1.52 (1.08, 1.97)      | 71.32 (50.71, 92.39)   | 124.48 (88.50, 163.40)  | 2.02 (1.35, 2.79)       | 94.71 (63.63, 131.22)   | 168.86 (114.18, 232.64) |
| <b>Liberia</b>          | 0.00 (0.00, 0.00)      | 0.00 (0.00, 0.00)      | 0.00 (0.00, 0.00)       | 0.00 (0.00, 0.00)       | 0.00 (0.00, 0.00)       | 0.00 (0.00, 0.00)       |
| <b>Libya</b>            | 4.97 (3.60, 6.36)      | 78.96 (57.12, 101.11)  | 107.90 (77.77, 138.57)  | 9.35 (6.51, 12.51)      | 148.56 (103.41, 198.70) | 219.10 (154.40, 293.34) |
| <b>Lithuania</b>        | 3.17 (2.25, 4.16)      | 100.50 (71.27, 131.87) | 61.75 (44.36, 80.35)    | 1.67 (1.17, 2.23)       | 53.11 (37.22, 70.70)    | 33.53 (23.72, 43.97)    |
| <b>Luxembourg</b>       | 0.20 (0.14, 0.27)      | 36.48 (25.60, 47.68)   | 25.89 (18.32, 33.77)    | 0.17 (0.12, 0.22)       | 31.13 (22.16, 40.37)    | 21.52 (15.28, 28.16)    |
| <b>Macedonia</b>        | 1.15 (0.82, 1.47)      | 55.16 (39.59, 70.95)   | 43.45 (31.41, 55.52)    | 2.25 (1.63, 2.88)       | 108.28 (78.60, 138.39)  | 86.14 (62.08, 109.72)   |
| <b>Madagascar</b>       | 10.33 (7.37, 13.37)    | 42.71 (30.47, 55.26)   | 82.75 (58.53, 108.21)   | 9.17 (6.33, 12.41)      | 37.91 (26.16, 51.30)    | 68.59 (47.60, 92.21)    |
| <b>Malawi</b>           | 8.78 (6.36, 11.29)     | 51.01 (36.95, 65.57)   | 109.83 (79.39, 142.95)  | 9.17 (6.36, 12.27)      | 53.26 (36.96, 71.30)    | 103.32 (72.48, 137.05)  |
| <b>Malaysia</b>         | 4.70 (3.35, 6.11)      | 15.51 (11.04, 20.18)   | 19.16 (13.48, 25.04)    | 11.27 (7.98, 14.63)     | 37.21 (26.33, 48.30)    | 47.69 (33.89, 61.68)    |
| <b>Maldives</b>         | 0.12 (0.08, 0.15)      | 32.02 (23.23, 40.83)   | 46.86 (34.02, 59.57)    | 0.41 (0.28, 0.56)       | 112.83 (77.79, 153.36)  | 171.15 (118.28, 230.15) |
| <b>Mali</b>             | 12.89 (9.34, 16.49)    | 73.36 (53.18, 93.87)   | 154.93 (111.18, 200.53) | 16.38 (11.46, 21.95)    | 93.23 (65.24, 124.95)   | 162.02 (113.44, 216.44) |
| <b>Malta</b>            | 0.18 (0.13, 0.24)      | 43.10 (30.52, 56.82)   | 24.96 (17.55, 32.76)    | 0.17 (0.12, 0.23)       | 41.64 (29.26, 55.28)    | 25.80 (17.98, 34.14)    |
| <b>Marshall Islands</b> | 0.00 (0.00, 0.00)      | 0.00 (0.00, 0.00)      | 0.00 (0.00, 0.00)       | 0.00 (0.00, 0.00)       | 0.00 (0.00, 0.00)       | 0.00 (0.00, 0.00)       |
| <b>Mauritania</b>       | 3.88 (2.79, 4.97)      | 94.91 (68.35, 121.77)  | 159.22 (114.17, 206.63) | 3.82 (2.63, 5.17)       | 93.62 (64.47, 126.47)   | 155.47 (107.46, 210.16) |
| <b>Mauritius</b>        | 0.44 (0.31, 0.57)      | 34.29 (24.08, 44.80)   | 29.81 (21.18, 38.80)    | 2.11 (1.49, 2.78)       | 165.84 (116.67, 218.42) | 145.74 (102.55, 193.09) |
| <b>Mexico</b>           | 137.61 (98.68, 177.83) | 108.32 (77.68, 139.97) | 137.61 (98.41, 178.80)  | 311.56 (227.46, 390.77) | 245.24 (179.04, 307.59) | 304.03 (221.95, 382.61) |
| <b>Moldova</b>          | 2.28 (1.60, 3.01)      | 56.13 (39.41, 74.09)   | 46.86 (33.49, 61.85)    | 1.35 (0.94, 1.78)       | 33.20 (23.16, 43.73)    | 28.60 (19.85, 38.17)    |
| <b>Mongolia</b>         | 2.54 (1.83, 3.29)      | 86.13 (61.84, 111.34)  | 131.02 (93.69, 170.41)  | 3.88 (2.19, 5.85)       | 131.22 (74.00, 198.03)  | 167.71 (103.81, 242.85) |



|                                 |                         |                        |                         |                         |                         |                         |
|---------------------------------|-------------------------|------------------------|-------------------------|-------------------------|-------------------------|-------------------------|
| <b>Montenegro</b>               | 0.41 (0.30, 0.53)       | 65.58 (47.33, 85.01)   | 49.22 (35.54, 63.15)    | 0.67 (0.49, 0.86)       | 107.57 (77.94, 138.06)  | 82.39 (59.82, 105.73)   |
| <b>Morocco</b>                  | 20.70 (15.05, 26.64)    | 60.22 (43.80, 77.49)   | 69.93 (50.31, 89.65)    | 54.19 (37.34, 73.07)    | 157.65 (108.63, 212.57) | 190.76 (131.21, 259.15) |
| <b>Mozambique</b>               | 10.63 (7.60, 13.83)     | 37.98 (27.16, 49.42)   | 76.22 (53.75, 99.50)    | 10.55 (6.83, 15.07)     | 37.71 (24.40, 53.83)    | 68.74 (44.97, 97.91)    |
| <b>Myanmar</b>                  | 20.52 (14.77, 26.34)    | 37.99 (27.34, 48.75)   | 47.49 (34.25, 60.68)    | 72.10 (51.34, 94.80)    | 133.45 (95.03, 175.48)  | 164.59 (118.35, 214.89) |
| <b>Namibia</b>                  | 1.34 (0.96, 1.74)       | 54.66 (39.03, 70.75)   | 94.50 (67.32, 123.60)   | 1.39 (0.91, 1.94)       | 56.77 (37.20, 79.14)    | 103.18 (67.97, 143.38)  |
| <b>Nepal</b>                    | 23.84 (17.27, 30.59)    | 83.50 (60.48, 107.15)  | 117.84 (84.33, 151.74)  | 34.01 (23.35, 45.63)    | 119.11 (81.80, 159.80)  | 172.09 (120.09, 228.43) |
| <b>Netherlands</b>              | 4.44 (3.12, 5.86)       | 25.83 (18.12, 34.11)   | 15.41 (10.85, 20.24)    | 3.84 (2.72, 5.01)       | 22.33 (15.83, 29.12)    | 13.49 (9.58, 17.64)     |
| <b>New Zealand</b>              | 0.00 (0.00, 0.00)       | 0.00 (0.00, 0.00)      | 0.00 (0.00, 0.00)       | 0.00 (0.00, 0.00)       | 0.00 (0.00, 0.00)       | 0.00 (0.00, 0.00)       |
| <b>Nicaragua</b>                | 6.33 (4.58, 8.19)       | 103.91 (75.25, 134.55) | 153.27 (110.22, 197.22) | 15.77 (11.07, 20.94)    | 259.01 (181.79, 344.00) | 350.66 (246.24, 461.78) |
| <b>Niger</b>                    | 15.10 (10.88, 19.41)    | 76.04 (54.79, 97.75)   | 155.10 (112.04, 201.47) | 18.99 (12.68, 26.34)    | 95.67 (63.84, 132.66)   | 165.85 (113.37, 227.06) |
| <b>Nigeria</b>                  | 140.66 (101.70, 180.23) | 77.08 (55.73, 98.76)   | 144.52 (103.59, 187.08) | 85.68 (59.86, 115.45)   | 46.95 (32.80, 63.26)    | 84.71 (58.31, 114.01)   |
| <b>North Korea</b>              | 10.91 (7.86, 14.14)     | 43.38 (31.24, 56.20)   | 44.22 (32.10, 56.62)    | 27.94 (20.06, 36.08)    | 111.07 (79.75, 143.39)  | 110.68 (79.45, 144.03)  |
| <b>Northern Mariana Islands</b> | 0.00 (0.00, 0.01)       | 4.06 (2.84, 5.36)      | 9.45 (6.67, 12.47)      | 0.02 (0.01, 0.02)       | 13.91 (9.36, 19.18)     | 30.01 (20.76, 40.37)    |
| <b>Norway</b>                   | 0.00 (0.00, 0.00)       | 0.00 (0.00, 0.00)      | 0.00 (0.00, 0.00)       | 0.00 (0.00, 0.00)       | 0.00 (0.00, 0.00)       | 0.00 (0.00, 0.00)       |
| <b>Oman</b>                     | 2.41 (1.75, 3.08)       | 53.87 (39.12, 68.73)   | 94.72 (68.30, 122.31)   | 3.11 (2.22, 4.05)       | 69.45 (49.56, 90.32)    | 133.13 (95.31, 171.44)  |
| <b>Pakistan</b>                 | 77.51 (56.63, 98.27)    | 41.00 (29.95, 51.98)   | 64.30 (46.68, 82.05)    | 246.12 (153.64, 353.37) | 130.18 (81.26, 186.91)  | 182.73 (113.75, 263.58) |
| <b>Palestine</b>                | 2.59 (1.87, 3.32)       | 55.46 (40.08, 71.09)   | 112.01 (80.08, 144.76)  | 5.58 (4.03, 7.13)       | 119.35 (86.24, 152.53)  | 264.79 (192.26, 339.14) |
| <b>Panama</b>                   | 0.96 (0.67, 1.28)       | 24.48 (17.14, 32.48)   | 28.53 (19.86, 37.87)    | 1.33 (0.94, 1.75)       | 33.98 (23.99, 44.65)    | 38.22 (26.76, 50.29)    |
| <b>Papua New Guinea</b>         | 0.13 (0.09, 0.17)       | 1.69 (1.19, 2.23)      | 3.03 (2.11, 4.00)       | 0.60 (0.36, 0.89)       | 7.82 (4.72, 11.70)      | 13.11 (8.02, 19.50)     |
| <b>Paraguay</b>                 | 1.33 (0.94, 1.73)       | 19.95 (14.11, 26.01)   | 27.91 (19.62, 36.66)    | 3.80 (2.69, 4.98)       | 57.05 (40.38, 74.85)    | 77.87 (55.16, 101.70)   |

|                                         |                       |                       |                         |                         |                         |                         |
|-----------------------------------------|-----------------------|-----------------------|-------------------------|-------------------------|-------------------------|-------------------------|
| <b>Peru</b>                             | 13.94 (10.11, 17.78)  | 44.40 (32.21, 56.62)  | 57.34 (41.46, 73.89)    | 29.10 (20.36, 38.58)    | 92.68 (64.86, 122.89)   | 115.33 (80.52, 152.93)  |
| <b>Philippines</b>                      | 38.96 (28.35, 49.52)  | 38.65 (28.12, 49.12)  | 53.88 (38.80, 68.32)    | 207.35 (148.93, 267.93) | 205.70 (147.75, 265.80) | 284.53 (205.31, 366.11) |
| <b>Poland</b>                           | 29.14 (20.79, 37.60)  | 74.90 (53.42, 96.62)  | 50.77 (36.67, 65.26)    | 29.47 (21.27, 37.75)    | 75.73 (54.66, 97.00)    | 51.37 (37.25, 66.05)    |
| <b>Portugal</b>                         | 0.00 (0.00, 0.00)     | 0.00 (0.00, 0.00)     | 0.00 (0.00, 0.00)       | 0.00 (0.00, 0.00)       | 0.00 (0.00, 0.00)       | 0.00 (0.00, 0.00)       |
| <b>Puerto Rico</b>                      | 2.14 (1.52, 2.79)     | 58.02 (41.36, 75.61)  | 43.71 (31.05, 56.69)    | 4.03 (2.90, 5.19)       | 109.42 (78.65, 140.83)  | 83.18 (59.51, 107.10)   |
| <b>Qatar</b>                            | 1.05 (0.76, 1.35)     | 47.36 (34.13, 60.94)  | 92.76 (66.44, 119.08)   | 1.25 (0.84, 1.70)       | 56.17 (37.79, 76.58)    | 129.54 (86.48, 179.64)  |
| <b>Romania</b>                          | 10.38 (7.47, 13.32)   | 53.14 (38.23, 68.24)  | 34.01 (24.55, 43.74)    | 13.72 (9.93, 17.66)     | 70.27 (50.87, 90.43)    | 45.55 (32.81, 58.52)    |
| <b>Russia</b>                           | 91.33 (64.40, 119.39) | 61.66 (43.48, 80.61)  | 44.39 (31.27, 58.14)    | 53.41 (35.80, 73.06)    | 36.06 (24.17, 49.33)    | 27.36 (18.33, 37.88)    |
| <b>Rwanda</b>                           | 6.27 (4.53, 8.07)     | 53.89 (38.92, 69.35)  | 109.18 (78.76, 140.88)  | 5.29 (3.56, 7.31)       | 45.47 (30.60, 62.83)    | 87.10 (58.68, 121.25)   |
| <b>Saint Lucia</b>                      | 0.04 (0.03, 0.05)     | 21.49 (15.19, 28.00)  | 21.57 (15.15, 28.46)    | 0.09 (0.06, 0.12)       | 48.42 (34.63, 62.48)    | 47.38 (33.62, 61.13)    |
| <b>Saint Vincent and the Grenadines</b> | 0.02 (0.02, 0.03)     | 20.66 (14.57, 27.12)  | 22.97 (16.13, 30.12)    | 0.06 (0.04, 0.08)       | 55.11 (39.35, 71.07)    | 59.25 (41.87, 76.15)    |
| <b>Samoa</b>                            | 0.00 (0.00, 0.00)     | 0.00 (0.00, 0.00)     | 0.00 (0.00, 0.00)       | 0.00 (0.00, 0.00)       | 0.00 (0.00, 0.00)       | 0.00 (0.00, 0.00)       |
| <b>Sao Tome and Principe</b>            | 0.05 (0.04, 0.07)     | 26.60 (18.89, 34.87)  | 50.12 (35.12, 66.25)    | 0.07 (0.05, 0.10)       | 38.84 (25.99, 53.11)    | 67.04 (46.10, 90.33)    |
| <b>Saudi Arabia</b>                     | 22.09 (15.99, 28.43)  | 70.27 (50.87, 90.43)  | 108.54 (78.59, 139.62)  | 34.11 (24.78, 43.85)    | 108.52 (78.82, 139.49)  | 209.54 (151.98, 266.42) |
| <b>Senegal</b>                          | 13.18 (9.55, 16.84)   | 87.26 (63.22, 111.46) | 166.93 (120.36, 217.81) | 17.26 (12.44, 22.29)    | 114.26 (82.33, 147.51)  | 201.83 (145.14, 260.94) |
| <b>Serbia</b>                           | 4.81 (3.45, 6.24)     | 54.29 (38.97, 70.48)  | 35.27 (25.45, 45.43)    | 9.68 (6.97, 12.39)      | 109.25 (78.66, 139.85)  | 71.38 (51.90, 90.78)    |
| <b>Seychelles</b>                       | 0.01 (0.01, 0.01)     | 11.12 (7.97, 14.61)   | 11.66 (8.24, 15.24)     | 0.06 (0.04, 0.08)       | 59.67 (41.69, 79.71)    | 62.47 (43.54, 82.95)    |
| <b>Sierra Leone</b>                     | 2.58 (1.83, 3.40)     | 39.98 (28.37, 52.56)  | 74.47 (52.46, 97.62)    | 3.38 (2.30, 4.63)       | 52.37 (35.60, 71.61)    | 85.72 (58.82, 115.97)   |
| <b>Singapore</b>                        | 1.80 (1.28, 2.34)     | 45.85 (32.63, 59.56)  | 36.70 (26.06, 47.70)    | 2.69 (1.89, 3.58)       | 68.68 (48.27, 91.14)    | 55.46 (38.80, 73.16)    |
| <b>Slovakia</b>                         | 2.94 (2.12, 3.82)     | 52.97 (38.07, 68.79)  | 38.25 (27.64, 49.43)    | 3.89 (2.80, 5.05)       | 70.00 (50.40, 90.88)    | 51.09 (36.21, 66.20)    |

|                        |                      |                        |                         |                        |                         |                         |
|------------------------|----------------------|------------------------|-------------------------|------------------------|-------------------------|-------------------------|
| <b>Slovenia</b>        | 1.06 (0.76, 1.37)    | 51.45 (36.91, 66.55)   | 30.77 (22.06, 39.69)    | 1.01 (0.72, 1.32)      | 48.94 (34.96, 63.93)    | 28.16 (19.93, 36.75)    |
| <b>Solomon Islands</b> | 0.00 (0.00, 0.00)    | 0.00 (0.00, 0.00)      | 0.00 (0.00, 0.00)       | 0.00 (0.00, 0.00)      | 0.00 (0.00, 0.00)       | 0.00 (0.00, 0.00)       |
| <b>Somalia</b>         | 4.23 (3.02, 5.51)    | 38.98 (27.81, 50.83)   | 76.87 (54.43, 100.26)   | 4.89 (3.37, 6.60)      | 45.07 (31.02, 60.81)    | 84.75 (58.59, 114.52)   |
| <b>South Africa</b>    | 60.27 (43.43, 77.00) | 112.19 (80.84, 143.33) | 146.54 (105.05, 187.65) | 78.29 (56.93, 99.75)   | 145.72 (105.98, 185.67) | 186.86 (135.89, 237.91) |
| <b>South Korea</b>     | 30.99 (22.52, 39.62) | 61.64 (44.79, 78.79)   | 45.33 (32.97, 57.95)    | 40.91 (28.68, 54.41)   | 81.36 (57.05, 108.21)   | 59.65 (42.11, 79.40)    |
| <b>South Sudan</b>     | 7.44 (5.38, 9.55)    | 60.55 (43.75, 77.68)   | 121.62 (87.40, 157.96)  | 7.34 (5.09, 9.90)      | 59.76 (41.43, 80.58)    | 112.01 (77.43, 152.44)  |
| <b>Spain</b>           | 0.00 (0.00, 0.00)    | 0.00 (0.00, 0.00)      | 0.00 (0.00, 0.00)       | 0.00 (0.00, 0.00)      | 0.00 (0.00, 0.00)       | 0.00 (0.00, 0.00)       |
| <b>Sri Lanka</b>       | 9.67 (7.03, 12.39)   | 46.61 (33.88, 59.69)   | 44.84 (32.61, 57.01)    | 27.05 (18.68, 35.98)   | 130.36 (90.03, 173.39)  | 127.97 (90.13, 170.38)  |
| <b>Sudan</b>           | 26.03 (18.77, 33.52) | 64.45 (46.46, 83.00)   | 112.68 (81.47, 146.65)  | 51.64 (35.95, 69.16)   | 127.87 (89.01, 171.22)  | 224.43 (155.47, 305.45) |
| <b>Suriname</b>        | 0.18 (0.13, 0.24)    | 33.41 (23.72, 43.84)   | 39.09 (27.76, 50.85)    | 0.54 (0.38, 0.70)      | 99.23 (70.12, 128.32)   | 113.04 (80.32, 146.34)  |
| <b>Swaziland</b>       | 0.79 (0.56, 1.02)    | 61.17 (43.78, 79.47)   | 114.19 (80.74, 149.79)  | 0.93 (0.57, 1.36)      | 71.86 (43.94, 105.19)   | 137.92 (85.57, 200.74)  |
| <b>Sweden</b>          | 0.00 (0.00, 0.00)    | 0.00 (0.00, 0.00)      | 0.00 (0.00, 0.00)       | 0.00 (0.00, 0.00)      | 0.00 (0.00, 0.00)       | 0.00 (0.00, 0.00)       |
| <b>Switzerland</b>     | 2.14 (1.50, 2.85)    | 25.81 (18.07, 34.38)   | 15.41 (10.77, 20.31)    | 1.28 (0.88, 1.73)      | 15.42 (10.60, 20.89)    | 8.85 (6.07, 12.05)      |
| <b>Syria</b>           | 10.71 (7.74, 13.73)  | 57.54 (41.54, 73.74)   | 90.21 (65.03, 116.49)   | 17.02 (11.81, 22.80)   | 91.37 (63.44, 122.44)   | 145.14 (95.07, 203.80)  |
| <b>Tajikistan</b>      | 4.94 (3.58, 6.35)    | 58.15 (42.11, 74.73)   | 105.26 (75.64, 135.83)  | 7.16 (5.11, 9.40)      | 84.25 (60.08, 110.54)   | 118.15 (84.06, 154.62)  |
| <b>Tanzania</b>        | 29.49 (21.40, 37.75) | 55.26 (40.10, 70.72)   | 111.66 (80.03, 144.68)  | 29.57 (20.88, 38.78)   | 55.40 (39.13, 72.66)    | 102.94 (72.10, 136.87)  |
| <b>Thailand</b>        | 44.70 (32.46, 57.48) | 65.84 (47.80, 84.66)   | 54.71 (39.42, 70.19)    | 120.20 (86.91, 154.57) | 177.04 (128.00, 227.66) | 147.71 (106.95, 189.58) |
| <b>The Bahamas</b>     | 0.07 (0.05, 0.09)    | 17.55 (12.20, 23.06)   | 17.97 (12.60, 23.64)    | 0.16 (0.11, 0.21)      | 41.58 (29.32, 54.40)    | 41.84 (29.32, 54.63)    |
| <b>The Gambia</b>      | 1.44 (1.05, 1.86)    | 72.18 (52.26, 92.74)   | 154.64 (112.08, 199.68) | 1.56 (1.10, 2.07)      | 78.09 (54.87, 103.59)   | 152.74 (108.08, 202.17) |
| <b>Timor-Leste</b>     | 0.12 (0.08, 0.15)    | 9.82 (6.98, 12.85)     | 15.97 (11.34, 20.86)    | 0.31 (0.20, 0.45)      | 26.36 (16.72, 38.10)    | 41.55 (26.17, 59.52)    |

|                             |                        |                        |                         |                        |                         |                         |
|-----------------------------|------------------------|------------------------|-------------------------|------------------------|-------------------------|-------------------------|
| <b>Togo</b>                 | 6.53 (4.73, 8.38)      | 89.42 (64.76, 114.73)  | 163.94 (117.68, 212.81) | 6.75 (4.48, 9.37)      | 92.38 (61.29, 128.24)   | 158.90 (106.35, 219.49) |
| <b>Tonga</b>                | 0.00 (0.00, 0.00)      | 0.00 (0.00, 0.00)      | 0.00 (0.00, 0.00)       | 0.00 (0.00, 0.00)      | 0.00 (0.00, 0.00)       | 0.00 (0.00, 0.00)       |
| <b>Trinidad and Tobago</b>  | 0.34 (0.24, 0.44)      | 24.73 (17.42, 32.52)   | 22.64 (15.85, 29.68)    | 0.79 (0.56, 1.03)      | 58.21 (41.50, 75.65)    | 53.06 (37.48, 68.83)    |
| <b>Tunisia</b>              | 10.87 (7.83, 14.03)    | 96.60 (69.60, 124.68)  | 99.93 (72.54, 128.48)   | 17.39 (11.77, 23.70)   | 154.56 (104.59, 210.69) | 166.84 (112.62, 226.87) |
| <b>Turkey</b>               | 107.73 (77.61, 138.62) | 137.38 (98.97, 176.77) | 147.75 (106.34, 190.82) | 103.23 (73.62, 134.37) | 131.64 (93.88, 171.35)  | 144.75 (103.04, 189.76) |
| <b>Turkmenistan</b>         | 4.49 (3.23, 5.76)      | 83.47 (59.96, 107.04)  | 125.07 (88.85, 162.56)  | 8.08 (5.91, 10.19)     | 150.22 (109.89, 189.36) | 192.21 (140.50, 242.68) |
| <b>Uganda</b>               | 18.97 (13.84, 24.23)   | 48.46 (35.34, 61.89)   | 116.67 (84.54, 150.41)  | 20.43 (14.50, 26.67)   | 52.19 (37.04, 68.12)    | 112.70 (79.91, 149.04)  |
| <b>Ukraine</b>              | 31.03 (21.74, 40.58)   | 66.73 (46.74, 87.25)   | 44.57 (31.62, 58.46)    | 15.15 (10.40, 20.57)   | 32.58 (22.36, 44.23)    | 23.64 (16.18, 32.30)    |
| <b>United Arab Emirates</b> | 5.89 (4.26, 7.60)      | 64.39 (46.57, 83.11)   | 104.27 (75.17, 134.17)  | 11.63 (7.43, 16.37)    | 127.18 (81.21, 178.99)  | 217.26 (144.57, 299.97) |
| <b>United Kingdom</b>       | 9.43 (6.59, 12.36)     | 14.67 (10.26, 19.25)   | 8.85 (6.21, 11.60)      | 6.35 (4.46, 8.39)      | 9.89 (6.94, 13.07)      | 6.12 (4.27, 8.10)       |
| <b>United States</b>        | 0.00 (0.00, 0.00)      | 0.00 (0.00, 0.00)      | 0.00 (0.00, 0.00)       | 0.00 (0.00, 0.00)      | 0.00 (0.00, 0.00)       | 0.00 (0.00, 0.00)       |
| <b>Uruguay</b>              | 0.33 (0.23, 0.44)      | 9.51 (6.58, 12.70)     | 6.97 (4.87, 9.27)       | 0.41 (0.29, 0.54)      | 12.02 (8.48, 15.75)     | 9.01 (6.34, 11.73)      |
| <b>Uzbekistan</b>           | 22.17 (15.98, 28.45)   | 74.03 (53.37, 95.03)   | 105.80 (75.84, 136.97)  | 36.51 (26.41, 46.89)   | 121.94 (88.20, 156.62)  | 145.71 (105.49, 185.71) |
| <b>Vanuatu</b>              | 0.00 (0.00, 0.00)      | 0.00 (0.00, 0.00)      | 0.00 (0.00, 0.00)       | 0.00 (0.00, 0.00)      | 0.00 (0.00, 0.00)       | 0.00 (0.00, 0.00)       |
| <b>Venezuela</b>            | 32.17 (22.93, 42.01)   | 103.43 (73.73, 135.05) | 131.52 (94.17, 170.60)  | 48.77 (34.76, 63.70)   | 156.79 (111.74, 204.78) | 194.19 (137.84, 254.47) |
| <b>Vietnam</b>              | 27.89 (20.21, 35.80)   | 29.84 (21.62, 38.30)   | 33.74 (24.45, 43.41)    | 104.22 (74.13, 135.01) | 111.50 (79.31, 144.44)  | 123.22 (88.58, 160.01)  |
| <b>Virgin Islands, U.S.</b> | 0.05 (0.04, 0.07)      | 47.66 (33.60, 62.81)   | 30.54 (21.54, 40.20)    | 0.10 (0.07, 0.13)      | 92.05 (64.52, 121.11)   | 61.65 (43.18, 81.47)    |
| <b>Yemen</b>                | 16.01 (11.57, 20.53)   | 59.50 (42.98, 76.27)   | 119.38 (86.19, 154.56)  | 29.90 (19.63, 41.81)   | 111.09 (72.96, 155.36)  | 235.43 (152.58, 331.79) |
| <b>Zambia</b>               | 9.85 (7.13, 12.61)     | 60.64 (43.90, 77.58)   | 132.06 (94.54, 170.67)  | 10.91 (7.58, 14.49)    | 67.12 (46.63, 89.15)    | 130.59 (91.31, 173.75)  |
| <b>Zimbabwe</b>             | 10.43 (7.46, 13.42)    | 66.94 (47.92, 86.14)   | 143.36 (101.91, 186.83) | 13.56 (9.34, 18.47)    | 87.10 (59.98, 118.61)   | 186.08 (126.46, 253.26) |

Attributable burden of disease, ABD; Disability Adjusted Life Years, DALY

**Supplemental Table 5:** Years living with disability (YLD) and years of life lost (YLL) using the World Health Organization recommended level of PM<sub>2.5</sub> as the theoretical minimum risk exposure level (TMREL), 10 ug/m<sup>3</sup>

| Location                   | YLD (in 1000s)                   | YLD (per 100,000)    | Age Standardized YLD (per 100,000) | YLL in 1000s                     | YLL (per 100,000)       | Age Standardized YLL (per 100,000) |
|----------------------------|----------------------------------|----------------------|------------------------------------|----------------------------------|-------------------------|------------------------------------|
| <b>Global</b>              | 2,047.18<br>(1,352.47, 2,852.81) | 27.77 (18.35, 38.70) | 29.57 (19.51, 41.12)               | 6,189.43<br>(4,532.12, 7,756.55) | 83.97 (61.49, 105.23)   | 88.41 (64.89, 110.21)              |
| <b>Afghanistan</b>         | 11.38 (7.40, 16.05)              | 34.91 (22.70, 49.23) | 72.66 (47.99, 101.24)              | 58.20 (36.71, 84.14)             | 178.50 (112.59, 258.04) | 371.49 (234.67, 535.24)            |
| <b>Albania</b>             | 0.35 (0.22, 0.51)                | 12.23 (7.66, 17.63)  | 10.16 (6.56, 14.44)                | 1.24 (0.86, 1.68)                | 42.80 (29.59, 57.99)    | 36.93 (25.52, 49.36)               |
| <b>Algeria</b>             | 16.51 (10.74, 23.36)             | 41.67 (27.11, 58.94) | 51.08 (33.70, 71.66)               | 34.37 (23.90, 46.24)             | 86.72 (60.30, 116.67)   | 117.49 (82.32, 157.01)             |
| <b>American Samoa</b>      | 0.00 (0.00, 0.00)                | 0.00 (0.00, 0.00)    | 0.00 (0.00, 0.00)                  | 0.00 (0.00, 0.00)                | 0.00 (0.00, 0.00)       | 0.00 (0.00, 0.00)                  |
| <b>Andorra</b>             | 0.00 (0.00, 0.00)                | 0.00 (0.00, 0.00)    | 0.00 (0.00, 0.00)                  | 0.00 (0.00, 0.00)                | 0.00 (0.00, 0.00)       | 0.00 (0.00, 0.00)                  |
| <b>Angola</b>              | 4.75 (3.06, 6.74)                | 18.80 (12.11, 26.70) | 45.42 (28.98, 65.41)               | 8.12 (4.89, 11.95)               | 32.17 (19.37, 47.33)    | 63.10 (37.35, 93.36)               |
| <b>Antigua and Barbuda</b> | 0.01 (0.00, 0.01)                | 7.35 (4.67, 10.61)   | 7.93 (4.96, 11.45)                 | 0.03 (0.02, 0.04)                | 32.66 (22.97, 43.06)    | 33.92 (23.76, 44.69)               |
| <b>Argentina</b>           | 3.79 (2.46, 5.41)                | 8.72 (5.67, 12.45)   | 8.23 (5.38, 11.63)                 | 11.18 (7.97, 14.44)              | 25.75 (18.36, 33.26)    | 24.17 (17.10, 31.29)               |
| <b>Armenia</b>             | 1.35 (0.86, 1.93)                | 44.80 (28.75, 64.14) | 38.16 (24.70, 53.90)               | 1.57 (1.14, 2.01)                | 52.35 (37.83, 66.75)    | 44.76 (32.53, 57.09)               |
| <b>Australia</b>           | 0.00 (0.00, 0.00)                | 0.00 (0.00, 0.00)    | 0.00 (0.00, 0.00)                  | 0.00 (0.00, 0.00)                | 0.00 (0.00, 0.00)       | 0.00 (0.00, 0.00)                  |
| <b>Austria</b>             | 1.39 (0.91, 1.97)                | 16.06 (10.46, 22.69) | 9.76 (6.33, 13.77)                 | 3.31 (2.39, 4.23)                | 38.18 (27.54, 48.85)    | 20.31 (14.58, 25.97)               |
| <b>Azerbaijan</b>          | 3.37 (2.15, 4.82)                | 34.42 (21.96, 49.26) | 39.75 (25.46, 56.39)               | 7.84 (5.42, 10.57)               | 80.15 (55.38, 108.05)   | 85.05 (59.61, 114.53)              |
| <b>Bahrain</b>             | 0.45 (0.29, 0.64)                | 33.23 (21.28, 46.95) | 45.79 (30.36, 63.51)               | 0.80 (0.53, 1.10)                | 58.73 (39.05, 80.81)    | 122.97 (81.37, 170.08)             |



|                                         |                         |                      |                      |                           |                       |                        |
|-----------------------------------------|-------------------------|----------------------|----------------------|---------------------------|-----------------------|------------------------|
| <b>Cape Verde</b>                       | 0.19 (0.13, 0.28)       | 37.42 (24.19, 53.26) | 56.20 (36.22, 79.52) | 0.36 (0.26, 0.48)         | 70.08 (49.24, 92.83)  | 95.20 (67.30, 125.84)  |
| <b>Central African Republic</b>         | 1.29 (0.84, 1.85)       | 26.40 (17.04, 37.66) | 49.12 (31.59, 70.11) | 2.83 (1.89, 3.88)         | 57.76 (38.53, 79.11)  | 88.58 (59.53, 120.91)  |
| <b>Chad</b>                             | 3.68 (2.33, 5.29)       | 26.15 (16.56, 37.60) | 62.49 (39.21, 89.07) | 12.53 (8.60, 16.88)       | 89.10 (61.14, 120.06) | 127.12 (88.85, 171.12) |
| <b>Chile</b>                            | 5.86 (3.93, 8.15)       | 32.67 (21.89, 45.40) | 28.63 (18.99, 39.72) | 12.46 (8.21, 17.15)       | 69.41 (45.76, 95.58)  | 60.53 (40.65, 83.93)   |
| <b>China</b>                            | 331.78 (218.42, 466.00) | 23.98 (15.79, 33.68) | 21.03 (13.78, 29.52) | 856.85 (624.59, 1,078.57) | 61.94 (45.15, 77.96)  | 54.86 (40.22, 69.46)   |
| <b>Colombia</b>                         | 8.95 (5.86, 12.53)      | 18.55 (12.15, 25.96) | 21.15 (13.94, 29.73) | 22.82 (16.39, 29.50)      | 47.28 (33.95, 61.12)  | 56.01 (39.94, 71.97)   |
| <b>Comoros</b>                          | 0.11 (0.07, 0.16)       | 13.94 (8.47, 20.30)  | 26.87 (16.31, 39.51) | 0.14 (0.08, 0.21)         | 17.18 (9.56, 26.49)   | 29.47 (16.21, 46.31)   |
| <b>Congo</b>                            | 1.11 (0.71, 1.58)       | 24.06 (15.39, 34.22) | 46.15 (29.49, 65.68) | 1.93 (1.27, 2.70)         | 41.69 (27.52, 58.39)  | 72.35 (47.47, 102.93)  |
| <b>Costa Rica</b>                       | 1.26 (0.82, 1.80)       | 26.29 (17.00, 37.51) | 26.52 (16.89, 37.76) | 4.34 (3.15, 5.51)         | 90.21 (65.46, 114.55) | 90.06 (65.08, 114.16)  |
| <b>Cote d'Ivoire</b>                    | 6.07 (3.80, 8.80)       | 26.76 (16.73, 38.79) | 54.16 (34.62, 77.47) | 18.89 (12.82, 25.99)      | 83.25 (56.49, 114.55) | 126.83 (83.68, 176.27) |
| <b>Croatia</b>                          | 1.16 (0.76, 1.63)       | 27.24 (17.86, 38.51) | 16.60 (10.83, 23.33) | 2.35 (1.68, 3.03)         | 55.34 (39.71, 71.43)  | 31.67 (22.90, 40.74)   |
| <b>Cuba</b>                             | 1.78 (1.12, 2.57)       | 15.61 (9.86, 22.60)  | 11.49 (7.11, 16.73)  | 5.75 (4.12, 7.40)         | 50.51 (36.15, 64.94)  | 37.56 (27.06, 48.30)   |
| <b>Cyprus</b>                           | 0.13 (0.08, 0.19)       | 14.74 (9.42, 20.94)  | 11.20 (7.27, 15.77)  | 0.46 (0.33, 0.59)         | 51.55 (37.19, 66.01)  | 37.05 (26.77, 47.23)   |
| <b>Czech Republic</b>                   | 2.97 (1.93, 4.18)       | 27.72 (18.07, 39.04) | 17.92 (11.67, 25.29) | 3.88 (2.81, 4.91)         | 36.31 (26.31, 45.88)  | 22.97 (16.70, 28.99)   |
| <b>Democratic Republic of the Congo</b> | 16.28 (10.49, 23.09)    | 21.03 (13.55, 29.83) | 47.02 (30.71, 66.80) | 24.29 (17.18, 32.09)      | 31.38 (22.20, 41.45)  | 56.41 (39.94, 73.63)   |
| <b>Denmark</b>                          | 0.09 (0.06, 0.13)       | 1.57 (1.01, 2.25)    | 1.02 (0.65, 1.45)    | 0.16 (0.11, 0.21)         | 2.79 (1.94, 3.72)     | 1.68 (1.17, 2.23)      |
| <b>Djibouti</b>                         | 0.26 (0.16, 0.37)       | 28.73 (17.91, 41.12) | 49.96 (31.19, 72.63) | 0.37 (0.23, 0.54)         | 41.87 (26.26, 60.66)  | 63.99 (40.03, 92.06)   |
| <b>Dominica</b>                         | 0.01 (0.00, 0.01)       | 8.68 (5.45, 12.45)   | 8.83 (5.54, 12.83)   | 0.03 (0.02, 0.04)         | 45.61 (31.89, 60.63)  | 46.29 (32.37, 61.20)   |
| <b>Dominican Republic</b>               | 1.36 (0.88, 1.93)       | 12.89 (8.38, 18.30)  | 15.83 (10.23, 22.46) | 6.44 (4.54, 8.57)         | 61.16 (43.10, 81.36)  | 74.13 (51.99, 98.03)   |







|                      |                         |                      |                       |                               |                         |                         |
|----------------------|-------------------------|----------------------|-----------------------|-------------------------------|-------------------------|-------------------------|
| <b>Guatemala</b>     | 4.73 (3.07, 6.64)       | 28.94 (18.78, 40.59) | 46.99 (30.68, 65.82)  | 26.09 (17.47, 35.84)          | 159.50 (106.84, 219.12) | 246.08 (164.39, 337.58) |
| <b>Guinea</b>        | 3.04 (1.91, 4.35)       | 24.19 (15.18, 34.62) | 48.23 (30.41, 69.71)  | 6.97 (4.64, 9.66)             | 55.45 (36.87, 76.79)    | 82.86 (55.23, 114.90)   |
| <b>Guinea-Bissau</b> | 0.68 (0.43, 0.97)       | 36.93 (23.20, 52.74) | 70.17 (44.44, 100.88) | 2.21 (1.53, 3.01)             | 119.33 (82.89, 162.89)  | 180.09 (123.43, 245.78) |
| <b>Guyana</b>        | 0.08 (0.05, 0.11)       | 9.99 (6.40, 14.25)   | 13.15 (8.41, 18.83)   | 0.52 (0.37, 0.68)             | 67.28 (47.75, 88.08)    | 80.77 (57.43, 105.42)   |
| <b>Haiti</b>         | 2.23 (1.43, 3.18)       | 20.84 (13.32, 29.67) | 33.43 (21.78, 47.35)  | 15.78 (9.78, 22.75)           | 147.20 (91.19, 212.16)  | 207.97 (129.75, 304.16) |
| <b>Honduras</b>      | 2.10 (1.34, 3.00)       | 25.89 (16.50, 37.04) | 40.84 (26.30, 57.89)  | 13.57 (8.47, 19.78)           | 167.57 (104.57, 244.32) | 269.11 (169.22, 385.92) |
| <b>Hungary</b>       | 3.19 (2.09, 4.53)       | 31.41 (20.59, 44.56) | 20.06 (13.09, 28.12)  | 5.26 (3.84, 6.69)             | 51.78 (37.80, 65.79)    | 32.64 (23.78, 41.63)    |
| <b>Iceland</b>       | 0.00 (0.00, 0.00)       | 0.00 (0.00, 0.00)    | 0.00 (0.00, 0.00)     | 0.00 (0.00, 0.00)             | 0.00 (0.00, 0.00)       | 0.00 (0.00, 0.00)       |
| <b>India</b>         | 321.95 (209.02, 458.60) | 24.55 (15.94, 34.96) | 32.64 (21.08, 46.40)  | 1,474.63 (1,061.17, 1,912.57) | 112.43 (80.90, 145.82)  | 138.74 (99.54, 179.15)  |
| <b>Indonesia</b>     | 20.12 (12.80, 28.94)    | 7.81 (4.97, 11.23)   | 9.92 (6.37, 14.17)    | 111.23 (80.12, 141.74)        | 43.18 (31.10, 55.02)    | 50.58 (36.47, 64.90)    |
| <b>Iran</b>          | 28.80 (18.43, 40.61)    | 36.44 (23.32, 51.38) | 45.00 (29.25, 63.43)  | 46.01 (31.39, 62.97)          | 58.22 (39.72, 79.67)    | 81.82 (54.70, 112.73)   |
| <b>Iraq</b>          | 13.83 (8.95, 19.67)     | 37.97 (24.58, 54.01) | 73.16 (47.17, 102.82) | 40.16 (26.07, 56.62)          | 110.27 (71.57, 155.45)  | 229.39 (149.71, 321.96) |
| <b>Ireland</b>       | 0.00 (0.00, 0.00)       | 0.00 (0.00, 0.00)    | 0.00 (0.00, 0.00)     | 0.00 (0.00, 0.00)             | 0.00 (0.00, 0.00)       | 0.00 (0.00, 0.00)       |
| <b>Israel</b>        | 2.09 (1.40, 2.89)       | 25.95 (17.34, 35.89) | 23.94 (15.95, 33.16)  | 5.65 (3.94, 7.62)             | 70.20 (48.95, 94.67)    | 61.63 (42.72, 83.12)    |
| <b>Italy</b>         | 14.15 (9.32, 20.00)     | 22.53 (14.84, 31.85) | 12.06 (7.69, 17.11)   | 27.87 (20.24, 35.52)          | 44.38 (32.22, 56.56)    | 19.95 (14.40, 25.31)    |
| <b>Jamaica</b>       | 0.48 (0.31, 0.69)       | 17.14 (11.12, 24.35) | 17.84 (11.51, 25.43)  | 2.32 (1.45, 3.35)             | 82.00 (51.19, 118.28)   | 85.43 (54.56, 123.21)   |
| <b>Japan</b>         | 21.47 (14.32, 30.11)    | 16.73 (11.16, 23.46) | 8.23 (5.40, 11.60)    | 26.97 (19.23, 34.38)          | 21.02 (14.99, 26.79)    | 8.66 (6.18, 11.05)      |
| <b>Jordan</b>        | 2.44 (1.58, 3.45)       | 32.19 (20.85, 45.56) | 53.15 (34.73, 74.27)  | 6.45 (4.23, 9.15)             | 85.19 (55.83, 120.81)   | 159.42 (103.99, 222.47) |
| <b>Kazakhstan</b>    | 3.82 (2.42, 5.48)       | 21.77 (13.80, 31.22) | 25.86 (16.34, 37.22)  | 6.30 (4.37, 8.45)             | 35.91 (24.95, 48.21)    | 39.04 (27.02, 52.79)    |

|                   |                   |                      |                      |                     |                        |                         |
|-------------------|-------------------|----------------------|----------------------|---------------------|------------------------|-------------------------|
| <b>Kenya</b>      | 3.80 (2.34, 5.50) | 8.22 (5.06, 11.90)   | 17.10 (10.69, 24.81) | 4.75 (3.21, 6.52)   | 10.28 (6.95, 14.12)    | 18.54 (12.62, 25.56)    |
| <b>Kiribati</b>   | 0.00 (0.00, 0.00) | 0.00 (0.00, 0.00)    | 0.00 (0.00, 0.00)    | 0.00 (0.00, 0.00)   | 0.00 (0.00, 0.00)      | 0.00 (0.00, 0.00)       |
| <b>Kuwait</b>     | 1.20 (0.77, 1.70) | 30.72 (19.84, 43.62) | 44.74 (29.67, 62.64) | 1.05 (0.68, 1.49)   | 26.96 (17.38, 38.24)   | 69.41 (45.60, 96.77)    |
| <b>Kyrgyzstan</b> | 0.87 (0.56, 1.26) | 14.82 (9.44, 21.32)  | 21.74 (13.81, 31.04) | 2.17 (1.56, 2.81)   | 36.88 (26.53, 47.67)   | 42.44 (30.47, 54.85)    |
| <b>Laos</b>       | 1.01 (0.65, 1.42) | 14.81 (9.55, 20.85)  | 25.84 (16.91, 36.11) | 7.60 (5.42, 10.03)  | 111.81 (79.72, 147.52) | 162.90 (116.05, 212.45) |
| <b>Latvia</b>     | 0.77 (0.48, 1.11) | 34.81 (21.71, 50.28) | 20.85 (13.31, 30.06) | 0.82 (0.60, 1.06)   | 37.18 (26.91, 48.02)   | 23.97 (17.24, 30.85)    |
| <b>Lebanon</b>    | 2.04 (1.33, 2.89) | 35.47 (23.14, 50.11) | 37.86 (24.58, 53.38) | 2.28 (1.59, 3.04)   | 39.53 (27.52, 52.77)   | 43.56 (30.06, 58.69)    |
| <b>Lesotho</b>    | 0.57 (0.36, 0.80) | 26.65 (16.99, 37.80) | 46.85 (30.05, 66.51) | 1.45 (0.88, 2.08)   | 68.07 (41.32, 97.76)   | 121.69 (77.01, 173.73)  |
| <b>Liberia</b>    | 0.00 (0.00, 0.00) | 0.00 (0.00, 0.00)    | 0.00 (0.00, 0.00)    | 0.00 (0.00, 0.00)   | 0.00 (0.00, 0.00)      | 0.00 (0.00, 0.00)       |
| <b>Libya</b>      | 2.23 (1.42, 3.19) | 35.36 (22.49, 50.60) | 46.50 (29.87, 65.78) | 7.14 (4.85, 9.72)   | 113.45 (77.09, 154.34) | 172.32 (119.22, 232.55) |
| <b>Lithuania</b>  | 0.89 (0.56, 1.28) | 28.24 (17.74, 40.50) | 17.04 (10.74, 24.36) | 0.78 (0.56, 0.99)   | 24.78 (17.86, 31.54)   | 16.42 (11.84, 20.85)    |
| <b>Luxembourg</b> | 0.06 (0.04, 0.09) | 11.11 (7.24, 15.74)  | 8.10 (5.21, 11.45)   | 0.11 (0.08, 0.14)   | 19.89 (14.17, 25.87)   | 13.41 (9.60, 17.33)     |
| <b>Macedonia</b>  | 0.65 (0.42, 0.91) | 31.14 (20.16, 43.97) | 24.97 (16.15, 35.05) | 1.60 (1.16, 2.03)   | 76.95 (56.06, 97.74)   | 60.84 (44.31, 77.06)    |
| <b>Madagascar</b> | 3.36 (2.10, 4.87) | 13.87 (8.68, 20.13)  | 28.95 (18.03, 41.75) | 5.80 (3.78, 8.11)   | 23.98 (15.64, 33.53)   | 39.25 (26.46, 54.52)    |
| <b>Malawi</b>     | 3.00 (1.86, 4.35) | 17.44 (10.78, 25.27) | 39.69 (24.63, 58.00) | 6.15 (4.15, 8.45)   | 35.72 (24.11, 49.08)   | 63.21 (42.89, 86.75)    |
| <b>Malaysia</b>   | 2.42 (1.53, 3.50) | 7.99 (5.04, 11.55)   | 9.96 (6.17, 14.52)   | 8.82 (6.28, 11.47)  | 29.11 (20.73, 37.88)   | 37.66 (26.80, 48.94)    |
| <b>Maldives</b>   | 0.06 (0.04, 0.08) | 16.04 (10.34, 22.99) | 22.73 (14.69, 32.24) | 0.35 (0.24, 0.48)   | 96.76 (64.94, 132.54)  | 148.14 (101.30, 203.53) |
| <b>Mali</b>       | 4.56 (2.88, 6.50) | 25.95 (16.37, 36.99) | 60.85 (38.91, 87.43) | 11.76 (7.72, 16.48) | 66.94 (43.93, 93.80)   | 100.92 (66.62, 141.60)  |
| <b>Malta</b>      | 0.05 (0.03, 0.08) | 12.63 (8.13, 18.04)  | 8.13 (5.27, 11.59)   | 0.12 (0.08, 0.16)   | 28.88 (19.97, 38.96)   | 17.53 (12.08, 23.68)    |

|                                 |                      |                      |                      |                         |                         |                         |
|---------------------------------|----------------------|----------------------|----------------------|-------------------------|-------------------------|-------------------------|
| <b>Marshall Islands</b>         | 0.00 (0.00, 0.00)    | 0.00 (0.00, 0.00)    | 0.00 (0.00, 0.00)    | 0.00 (0.00, 0.00)       | 0.00 (0.00, 0.00)       | 0.00 (0.00, 0.00)       |
| <b>Mauritania</b>               | 1.32 (0.83, 1.90)    | 32.38 (20.25, 46.54) | 58.81 (37.13, 84.70) | 2.48 (1.61, 3.53)       | 60.69 (39.30, 86.46)    | 96.33 (62.60, 135.98)   |
| <b>Mauritius</b>                | 0.24 (0.16, 0.35)    | 19.01 (12.30, 27.24) | 17.24 (11.10, 24.57) | 1.86 (1.30, 2.46)       | 146.16 (101.76, 192.74) | 129.09 (90.56, 170.44)  |
| <b>Mexico</b>                   | 50.01 (33.33, 69.50) | 39.37 (26.24, 54.71) | 48.23 (31.98, 67.07) | 260.98 (191.44, 327.02) | 205.43 (150.69, 257.41) | 255.19 (187.29, 320.56) |
| <b>Moldova</b>                  | 0.63 (0.39, 0.92)    | 15.53 (9.66, 22.71)  | 13.72 (8.48, 20.01)  | 0.71 (0.51, 0.94)       | 17.51 (12.42, 23.01)    | 14.85 (10.67, 19.38)    |
| <b>Mongolia</b>                 | 1.04 (0.65, 1.49)    | 35.07 (21.99, 50.37) | 51.89 (32.88, 74.65) | 2.83 (1.30, 4.60)       | 95.77 (44.00, 155.77)   | 115.55 (59.53, 182.08)  |
| <b>Montenegro</b>               | 0.17 (0.11, 0.25)    | 27.41 (17.04, 39.88) | 20.89 (12.93, 30.41) | 0.50 (0.36, 0.65)       | 80.06 (57.23, 103.50)   | 61.29 (44.27, 79.51)    |
| <b>Morocco</b>                  | 11.42 (7.35, 16.31)  | 33.22 (21.39, 47.46) | 38.65 (24.66, 55.35) | 42.69 (28.30, 59.15)    | 124.18 (82.33, 172.09)  | 151.44 (98.73, 213.29)  |
| <b>Mozambique</b>               | 3.79 (2.38, 5.51)    | 13.53 (8.51, 19.68)  | 28.99 (18.34, 41.69) | 6.78 (3.59, 10.58)      | 24.23 (12.83, 37.80)    | 40.01 (21.40, 62.78)    |
| <b>Myanmar</b>                  | 10.37 (6.58, 14.75)  | 19.20 (12.19, 27.30) | 24.72 (15.88, 35.01) | 61.62 (43.47, 81.51)    | 114.05 (80.47, 150.87)  | 139.84 (99.41, 183.83)  |
| <b>Namibia</b>                  | 0.48 (0.30, 0.68)    | 19.39 (12.30, 27.69) | 34.76 (21.93, 49.98) | 0.91 (0.55, 1.35)       | 37.20 (22.42, 54.94)    | 68.14 (41.46, 101.42)   |
| <b>Nepal</b>                    | 7.76 (5.03, 10.96)   | 27.19 (17.61, 38.40) | 40.74 (25.91, 58.14) | 26.15 (17.54, 36.12)    | 91.60 (61.45, 126.50)   | 130.76 (87.57, 179.62)  |
| <b>Netherlands</b>              | 1.41 (0.93, 2.00)    | 8.20 (5.41, 11.61)   | 5.30 (3.47, 7.47)    | 2.42 (1.73, 3.16)       | 14.10 (10.06, 18.35)    | 8.19 (5.83, 10.64)      |
| <b>New Zealand</b>              | 0.00 (0.00, 0.00)    | 0.00 (0.00, 0.00)    | 0.00 (0.00, 0.00)    | 0.00 (0.00, 0.00)       | 0.00 (0.00, 0.00)       | 0.00 (0.00, 0.00)       |
| <b>Nicaragua</b>                | 1.77 (1.16, 2.46)    | 29.07 (18.97, 40.43) | 40.26 (26.36, 57.18) | 13.96 (9.76, 18.71)     | 229.28 (160.23, 307.36) | 310.15 (217.89, 411.28) |
| <b>Niger</b>                    | 5.20 (3.31, 7.42)    | 26.20 (16.65, 37.37) | 60.33 (38.50, 85.59) | 13.81 (8.60, 20.07)     | 69.55 (43.33, 101.09)   | 105.32 (66.30, 150.45)  |
| <b>Nigeria</b>                  | 43.99 (27.51, 63.27) | 24.11 (15.07, 34.67) | 52.00 (33.07, 74.66) | 41.45 (27.56, 58.05)    | 22.71 (15.10, 31.81)    | 32.30 (21.25, 45.22)    |
| <b>North Korea</b>              | 7.11 (4.68, 9.91)    | 28.27 (18.59, 39.40) | 29.04 (19.01, 40.78) | 20.75 (14.76, 27.05)    | 82.46 (58.68, 107.52)   | 81.68 (58.19, 106.40)   |
| <b>Northern Mariana Islands</b> | 0.00 (0.00, 0.00)    | 2.71 (1.71, 3.93)    | 5.04 (3.25, 7.38)    | 0.01 (0.01, 0.02)       | 11.17 (7.31, 15.58)     | 24.92 (16.91, 34.15)    |



|                              |                      |                      |                      |                      |                        |                         |
|------------------------------|----------------------|----------------------|----------------------|----------------------|------------------------|-------------------------|
| <b>Sao Tome and Principe</b> | 0.02 (0.01, 0.02)    | 8.42 (5.27, 12.30)   | 16.18 (10.16, 23.39) | 0.06 (0.04, 0.08)    | 30.25 (19.95, 42.51)   | 50.89 (34.43, 70.03)    |
| <b>Saudi Arabia</b>          | 9.55 (6.17, 13.59)   | 30.39 (19.64, 43.22) | 45.30 (29.76, 63.49) | 24.50 (17.61, 31.42) | 77.94 (56.01, 99.95)   | 163.92 (119.09, 209.47) |
| <b>Senegal</b>               | 4.70 (2.98, 6.76)    | 31.09 (19.73, 44.71) | 64.85 (41.07, 93.06) | 12.48 (8.87, 16.46)  | 82.62 (58.69, 108.93)  | 136.81 (98.45, 176.64)  |
| <b>Serbia</b>                | 2.52 (1.62, 3.55)    | 28.40 (18.33, 40.09) | 18.58 (12.08, 26.25) | 7.15 (5.19, 9.13)    | 80.74 (58.65, 103.06)  | 52.76 (38.15, 66.92)    |
| <b>Seychelles</b>            | 0.01 (0.00, 0.01)    | 5.72 (3.48, 8.36)    | 5.94 (3.76, 8.61)    | 0.05 (0.04, 0.07)    | 53.82 (37.25, 72.00)   | 56.39 (38.89, 75.12)    |
| <b>Sierra Leone</b>          | 0.87 (0.54, 1.26)    | 13.52 (8.40, 19.57)  | 28.68 (17.81, 41.78) | 2.50 (1.64, 3.50)    | 38.71 (25.34, 54.12)   | 56.96 (38.11, 79.27)    |
| <b>Singapore</b>             | 0.95 (0.63, 1.33)    | 24.28 (16.15, 33.90) | 19.00 (12.57, 26.55) | 1.73 (1.19, 2.35)    | 44.08 (30.37, 59.92)   | 36.25 (24.74, 49.52)    |
| <b>Slovakia</b>              | 1.39 (0.89, 1.98)    | 24.98 (15.97, 35.70) | 18.19 (11.63, 26.15) | 2.49 (1.77, 3.23)    | 44.78 (31.88, 58.16)   | 32.63 (23.12, 42.46)    |
| <b>Slovenia</b>              | 0.51 (0.33, 0.73)    | 24.86 (16.15, 35.49) | 15.15 (9.85, 21.15)  | 0.49 (0.35, 0.64)    | 23.98 (17.15, 31.24)   | 12.93 (9.30, 16.75)     |
| <b>Solomon Islands</b>       | 0.00 (0.00, 0.00)    | 0.00 (0.00, 0.00)    | 0.00 (0.00, 0.00)    | 0.00 (0.00, 0.00)    | 0.00 (0.00, 0.00)      | 0.00 (0.00, 0.00)       |
| <b>Somalia</b>               | 1.70 (1.06, 2.46)    | 15.65 (9.79, 22.69)  | 32.99 (20.74, 47.70) | 3.16 (2.08, 4.47)    | 29.12 (19.22, 41.19)   | 51.46 (33.43, 72.91)    |
| <b>South Africa</b>          | 19.72 (12.80, 27.66) | 36.70 (23.82, 51.49) | 48.91 (31.84, 68.99) | 58.33 (42.65, 73.98) | 108.58 (79.39, 137.71) | 137.43 (99.68, 173.95)  |
| <b>South Korea</b>           | 17.38 (11.76, 23.83) | 34.56 (23.38, 47.39) | 25.33 (17.04, 34.81) | 23.55 (15.11, 33.25) | 46.84 (30.04, 66.12)   | 34.25 (22.30, 47.93)    |
| <b>South Sudan</b>           | 2.99 (1.89, 4.30)    | 24.33 (15.36, 34.97) | 51.75 (32.09, 75.36) | 4.35 (2.72, 6.21)    | 35.39 (22.17, 50.52)   | 59.89 (37.95, 85.45)    |
| <b>Spain</b>                 | 0.00 (0.00, 0.00)    | 0.00 (0.00, 0.00)    | 0.00 (0.00, 0.00)    | 0.00 (0.00, 0.00)    | 0.00 (0.00, 0.00)      | 0.00 (0.00, 0.00)       |
| <b>Sri Lanka</b>             | 4.86 (3.15, 6.82)    | 23.41 (15.19, 32.87) | 23.28 (14.92, 33.03) | 22.08 (14.85, 30.20) | 106.42 (71.55, 145.57) | 105.07 (70.89, 142.32)  |
| <b>Sudan</b>                 | 12.33 (7.95, 17.47)  | 30.53 (19.68, 43.26) | 54.58 (36.28, 75.67) | 39.11 (26.35, 54.08) | 96.84 (65.23, 133.89)  | 169.37 (111.48, 238.89) |
| <b>Suriname</b>              | 0.07 (0.05, 0.10)    | 13.05 (8.47, 18.56)  | 14.93 (9.48, 21.37)  | 0.47 (0.33, 0.61)    | 85.96 (60.88, 112.08)  | 97.82 (69.19, 128.13)   |
| <b>Swaziland</b>             | 0.27 (0.18, 0.39)    | 21.09 (13.74, 29.99) | 40.62 (26.32, 58.01) | 0.66 (0.34, 1.02)    | 50.88 (26.32, 78.97)   | 97.54 (51.30, 152.07)   |

|                             |                      |                      |                      |                        |                         |                         |
|-----------------------------|----------------------|----------------------|----------------------|------------------------|-------------------------|-------------------------|
| <b>Sweden</b>               | 0.00 (0.00, 0.00)    | 0.00 (0.00, 0.00)    | 0.00 (0.00, 0.00)    | 0.00 (0.00, 0.00)      | 0.00 (0.00, 0.00)       | 0.00 (0.00, 0.00)       |
| <b>Switzerland</b>          | 0.57 (0.36, 0.82)    | 6.86 (4.36, 9.91)    | 4.31 (2.76, 6.29)    | 0.70 (0.47, 0.98)      | 8.48 (5.71, 11.87)      | 4.52 (2.97, 6.31)       |
| <b>Syria</b>                | 5.14 (3.24, 7.40)    | 27.61 (17.38, 39.72) | 43.40 (27.65, 62.59) | 11.80 (7.54, 16.82)    | 63.35 (40.48, 90.33)    | 102.17 (57.85, 152.97)  |
| <b>Tajikistan</b>           | 2.03 (1.29, 2.92)    | 23.91 (15.12, 34.36) | 42.03 (26.52, 59.98) | 5.11 (3.56, 6.86)      | 60.10 (41.84, 80.63)    | 75.56 (52.60, 101.68)   |
| <b>Tanzania</b>             | 9.90 (6.17, 14.29)   | 18.55 (11.56, 26.78) | 40.10 (25.68, 57.59) | 19.58 (13.68, 25.94)   | 36.68 (25.63, 48.61)    | 62.52 (43.89, 83.87)    |
| <b>Thailand</b>             | 19.46 (12.54, 27.84) | 28.66 (18.47, 41.01) | 24.40 (15.75, 34.46) | 100.91 (72.11, 129.44) | 148.63 (106.22, 190.66) | 123.20 (88.60, 158.83)  |
| <b>The Bahamas</b>          | 0.02 (0.02, 0.04)    | 6.44 (4.06, 9.24)    | 6.61 (4.24, 9.53)    | 0.14 (0.10, 0.18)      | 35.02 (24.58, 45.95)    | 34.98 (24.53, 46.16)    |
| <b>The Gambia</b>           | 0.49 (0.30, 0.70)    | 24.38 (15.15, 35.15) | 58.57 (36.46, 83.32) | 1.07 (0.72, 1.46)      | 53.54 (36.11, 73.20)    | 94.33 (64.94, 127.22)   |
| <b>Timor-Leste</b>          | 0.06 (0.04, 0.08)    | 4.88 (3.09, 7.11)    | 8.33 (5.23, 12.16)   | 0.26 (0.15, 0.38)      | 21.44 (12.65, 32.18)    | 33.00 (19.72, 49.20)    |
| <b>Togo</b>                 | 2.07 (1.31, 2.98)    | 28.36 (17.92, 40.75) | 56.83 (36.28, 81.33) | 4.67 (2.87, 6.81)      | 64.00 (39.31, 93.21)    | 101.35 (62.08, 148.63)  |
| <b>Tonga</b>                | 0.00 (0.00, 0.00)    | 0.00 (0.00, 0.00)    | 0.00 (0.00, 0.00)    | 0.00 (0.00, 0.00)      | 0.00 (0.00, 0.00)       | 0.00 (0.00, 0.00)       |
| <b>Trinidad and Tobago</b>  | 0.13 (0.09, 0.19)    | 9.87 (6.43, 14.19)   | 9.21 (5.95, 13.14)   | 0.66 (0.47, 0.86)      | 48.28 (34.29, 62.87)    | 43.77 (30.97, 56.85)    |
| <b>Tunisia</b>              | 5.07 (3.34, 7.12)    | 45.09 (29.67, 63.28) | 46.29 (30.89, 65.29) | 12.17 (7.73, 17.42)    | 108.15 (68.69, 154.83)  | 119.91 (75.89, 170.51)  |
| <b>Turkey</b>               | 45.45 (29.94, 63.66) | 57.96 (38.18, 81.17) | 61.97 (41.33, 87.17) | 57.26 (39.37, 77.22)   | 73.02 (50.20, 98.47)    | 81.84 (56.78, 110.38)   |
| <b>Turkmenistan</b>         | 1.83 (1.16, 2.62)    | 33.95 (21.59, 48.71) | 48.87 (30.36, 70.58) | 6.24 (4.59, 7.85)      | 115.93 (85.24, 145.79)  | 142.94 (104.59, 179.26) |
| <b>Uganda</b>               | 6.61 (4.18, 9.36)    | 16.88 (10.68, 23.90) | 43.89 (27.79, 62.74) | 13.81 (9.65, 18.39)    | 35.28 (24.65, 46.98)    | 68.61 (48.46, 90.65)    |
| <b>Ukraine</b>              | 7.71 (4.83, 11.11)   | 16.57 (10.39, 23.89) | 11.49 (7.25, 16.69)  | 7.50 (4.90, 10.53)     | 16.13 (10.54, 22.64)    | 12.08 (7.91, 17.11)     |
| <b>United Arab Emirates</b> | 3.57 (2.31, 5.03)    | 39.03 (25.29, 54.98) | 53.70 (34.58, 75.47) | 8.00 (4.68, 11.84)     | 87.50 (51.13, 129.41)   | 163.20 (100.84, 238.05) |
| <b>United Kingdom</b>       | 2.83 (1.83, 4.04)    | 4.41 (2.85, 6.29)    | 2.86 (1.84, 4.08)    | 3.50 (2.51, 4.47)      | 5.45 (3.90, 6.95)       | 3.25 (2.33, 4.16)       |

|                                                                   |                     |                      |                      |                       |                        |                         |
|-------------------------------------------------------------------|---------------------|----------------------|----------------------|-----------------------|------------------------|-------------------------|
| <b>United States</b>                                              | 0.00 (0.00, 0.00)   | 0.00 (0.00, 0.00)    | 0.00 (0.00, 0.00)    | 0.00 (0.00, 0.00)     | 0.00 (0.00, 0.00)      | 0.00 (0.00, 0.00)       |
| <b>Uruguay</b>                                                    | 0.13 (0.08, 0.19)   | 3.82 (2.45, 5.46)    | 2.89 (1.87, 4.11)    | 0.28 (0.20, 0.37)     | 8.20 (5.80, 10.65)     | 6.08 (4.30, 7.89)       |
| <b>Uzbekistan</b>                                                 | 8.33 (5.38, 11.72)  | 27.84 (17.96, 39.15) | 38.59 (24.71, 54.94) | 28.11 (20.38, 36.24)  | 93.89 (68.06, 121.04)  | 106.63 (77.03, 136.37)  |
| <b>Vanuatu</b>                                                    | 0.00 (0.00, 0.00)   | 0.00 (0.00, 0.00)    | 0.00 (0.00, 0.00)    | 0.00 (0.00, 0.00)     | 0.00 (0.00, 0.00)      | 0.00 (0.00, 0.00)       |
| <b>Venezuela</b>                                                  | 7.91 (5.20, 11.19)  | 25.44 (16.70, 35.98) | 31.92 (20.84, 45.23) | 40.84 (28.56, 54.04)  | 131.29 (91.82, 173.73) | 161.68 (113.49, 214.22) |
| <b>Vietnam</b>                                                    | 14.83 (9.73, 20.94) | 15.86 (10.41, 22.41) | 17.29 (11.43, 24.17) | 88.96 (63.22, 116.91) | 95.17 (67.64, 125.08)  | 105.85 (75.39, 138.02)  |
| <b>Virgin Islands, U.S.</b>                                       | 0.02 (0.01, 0.02)   | 15.19 (9.45, 22.03)  | 10.49 (6.59, 15.10)  | 0.08 (0.06, 0.11)     | 76.75 (53.39, 102.08)  | 51.16 (35.43, 68.56)    |
| <b>Yemen</b>                                                      | 7.74 (4.93, 11.13)  | 28.77 (18.33, 41.37) | 59.85 (38.83, 84.91) | 22.09 (13.44, 32.34)  | 82.07 (49.93, 120.17)  | 175.22 (107.99, 256.20) |
| <b>Zambia</b>                                                     | 3.18 (2.01, 4.54)   | 19.56 (12.36, 27.95) | 43.73 (27.72, 62.35) | 7.69 (5.13, 10.63)    | 47.32 (31.59, 65.40)   | 86.42 (57.46, 119.13)   |
| <b>Zimbabwe</b>                                                   | 3.53 (2.25, 5.09)   | 22.69 (14.45, 32.70) | 48.08 (30.43, 68.21) | 10.03 (6.54, 14.17)   | 64.40 (41.97, 90.99)   | 137.14 (89.08, 194.76)  |
| <b>Years living with disability, YLD; Years of life lost, YLL</b> |                     |                      |                      |                       |                        |                         |
